# Supplementary material
Source: PubMed Central journal article supplement (PMC4376567)

## Supplementary Figures and Tables

# Dissecting the Roles of microRNAs in Coronary Heart Disease via Integrative Genomics Analyses

Tianxiao Huan<sup>1,2</sup>, Jian Rong<sup>3</sup>, Kahraman Tanriverdi<sup>4</sup>, Qingying Meng<sup>5</sup>, Anindya Bhattacharya<sup>5</sup>, David D. McManus<sup>4</sup>, Roby Joehanes<sup>1,2,6,7,8</sup>, Themistocles L. Assimes<sup>9</sup>, Ruth McPherson<sup>10</sup>, Nilesh J. Samani<sup>11,12</sup>, Jeanette Erdmann<sup>13, 14</sup>, Heribert Schunkert<sup>15,16</sup>, Coronary ARteryDIsease Genome wide Replication and Meta-analysis (CARDIoGRAM) Consortium, Paul Courchesne<sup>1,2</sup>, Peter J. Munson<sup>8</sup>, Andrew D. Johnson<sup>1,17</sup>, Christopher J. O'Donnell<sup>1,17</sup>, Bin Zhang<sup>18,19</sup>, Martin G. Larson<sup>3</sup>, Jane E Freedman<sup>4\*</sup>, Daniel Levy<sup>1,2\*</sup> and Xia Yang<sup>5\*</sup>

<sup>1</sup>The National Heart, Lung, and Blood Institute's Framingham Heart Study, 73 Mt. Wayte Avenue, Framingham, MA, USA; <sup>2</sup>The Population Sciences Branch, Division of Intramural Research, National Heart, Lung, and Blood Institute, Bethesda, MD, USA; <sup>3</sup>Department of Mathematics and Statistics, Boston University, Boston, MA, USA; <sup>4</sup>Department of Medicine, University of Massachusetts Medical School, Worcester, MA, USA; <sup>5</sup>Department of Integrative Biology and Physiology, University of California, Los Angeles, CA, USA; <sup>6</sup>Mathematical and Statistical Computing Laboratory, Center for Information Technology, National Institutes of Health, Bethesda, MD, USA; <sup>7</sup>Harvard Medical School, Boston, MA, USA; <sup>8</sup>Hebrew SeniorLife, Boston, MA, USA; <sup>9</sup>Department of Medicine, Stanford University School of Medicine, Palo Alto, CA, USA; <sup>10</sup>Departments of Medicine and Biochemistry, University of Ottawa, Ottawa, Canada; <sup>11</sup>Department of Cardiovascular Sciences, University of Leicester, Leicester, UK; <sup>12</sup>NIHR Leicester Cardiovascular Biomedical Research Unit, Glenfield Hospital, Leicester, UK; <sup>13</sup>Institut für Integrative und Experimentelle Genomik, Universität zu Lübeck, Lübeck, Germany; <sup>14</sup>DZHK (German Research Centre for Cardiovascular Research), partner site Hamburg/Lübeck/Kiel, Lübeck, Germany, <sup>15</sup>Deutsches Herzzentrum München, Technische Universität München, 80636 München, Germany; <sup>16</sup>DZHK (German Centre for Cardiovascular Research), partner site Munich Heart Alliance, Munich, Germany; <sup>17</sup>Cardiovascular Epidemiology and Human Genomics Branch, Division of Intramural Research, National Heart, Lung and Blood Institute, Bethesda, MD, USA; <sup>18</sup>Department of Genetics and Genomic Sciences, <sup>19</sup>Institute of Genomics and Multiscale Biology, New York, NY;

**Running title:** *Huan et al.; Dissecting the Roles of miRNAs in Coronary Heart Disease*

### Correspondence should be addressed to:

Jane E. Freedman, MD  
University of Massachusetts Medical School  
AS7-1051, 368 Plantation St.  
Worcester, MA 01605-4319 USA  
Email: jane.freedman@umassmed.edu  
Phone: (508) 856-6961

Daniel Levy, MD

Framingham Heart Study  
Center for Population Studies  
National Heart, Lung, and Blood Institute  
73 Mt. Wayte Avenue, Suite 2  
Framingham, MA 01702  
Email: [Levyd@nih.gov](mailto:Levyd@nih.gov)  
Phone: 508-935-3458  
Fax: 508-872-2678

Xia Yang, PhD  
Department of Integrative Biology and Physiology  
University of California, Los Angeles  
Los Angeles, CA 90095  
Email: [xyang123@ucla.edu](mailto:xyang123@ucla.edu)  
Phone: 310-206-1812  
Fax: 310-206-9184

**Supplementary Table I: Clinical Characteristics Summary of the 186 Coronary Heart Disease Case-control Pairs**

|                                           | <b>CHD Cases</b><br>N=186 | <b>CHD Controls</b><br>N=186 |
|-------------------------------------------|---------------------------|------------------------------|
| <b>Age (yr )</b>                          | 70.8±7.9                  | 70.8±8.0                     |
| <b>Sex, male (female)</b>                 | 139 (47)                  | 139 (47)                     |
| <b>Hypertension, n (%)</b>                | 158 (85)                  | 130 (70)                     |
| <b>Diabetes, n (%)</b>                    | 49 (26)                   | 30 (16)                      |
| <b>BMI (kg/m<sup>2</sup>)</b>             | 28.8±4.7                  | 28.7±4.8                     |
| <b>Systolic BP (mm Hg)</b>                | 128 ±19                   | 129±16                       |
| <b>Diastolic BP (mm Hg)</b>               | 69±10                     | 73±10                        |
| <b>Total cholesterol (mg/dl)</b>          | 151±33                    | 173±31                       |
| <b>Triglycerides (mg/dl)</b>              | 126±86                    | 117±71                       |
| <b>HDL cholesterol (mg/dl)</b>            | 48±14                     | 53±15                        |
| <b>Glucose</b>                            | 115±34                    | 110±21                       |
| <b>Lipid treatment, n (%)</b>             | 175 (94)                  | 125 (67)                     |
| <b>Anti-hypertensive treatment, n (%)</b> | 142 (76)                  | 103 (55)                     |
| <b>Diabetes treatment, n (%)</b>          | 38 (20)                   | 31 (17)                      |
| <b>Current cigarette smoking, n (%)</b>   | 2 (1)                     | 15 (8)                       |

**Supplementary Table II: The correlations between miRNA expression levels and cell counts proportion.**

| miRNA        | pval_WBC | pval_RBC | pval_PLT       | pval_LY        | pval_MO | pval_EO        | pval_BA |
|--------------|----------|----------|----------------|----------------|---------|----------------|---------|
| let_7a_5p    | 1.8E-01  | 3.3E-01  | 2.4E-01        | 8.8E-01        | 8.1E-01 | 7.1E-01        | 5.1E-01 |
| let_7b_5p    | 4.8E-03  | 3.6E-01  | 5.4E-01        | 1.7E-03        | 8.1E-01 | 1.4E-01        | 6.5E-01 |
| let_7c       | 9.7E-04  | 1.8E-01  | 4.7E-01        | 1.4E-02        | 4.1E-01 | 8.6E-02        | 3.6E-01 |
| let_7d_3p    | 5.4E-03  | 5.1E-02  | 9.8E-01        | 9.8E-01        | 6.0E-01 | 8.9E-01        | 3.5E-02 |
| let_7d_5p    | 1.1E-01  | 3.4E-01  | 2.3E-01        | 3.1E-01        | 8.0E-01 | 2.4E-02        | 1.7E-01 |
| let_7e_5p    | 6.3E-01  | 1.9E-01  | 1.3E-01        | 9.2E-01        | 8.2E-01 | 2.6E-03        | 2.2E-01 |
| let_7g_3p    | 1.7E-01  | 5.8E-01  | 5.1E-01        | 6.6E-02        | 9.9E-01 | 8.2E-01        | 7.2E-01 |
| let_7g_5p    | 9.0E-01  | 5.7E-01  | 6.0E-01        | 8.3E-01        | 6.6E-01 | 1.0E-02        | 6.5E-01 |
| miR_100_5p   | 8.1E-01  | 5.1E-02  | 1.6E-01        | 7.5E-01        | 1.5E-01 | 6.6E-01        | 8.9E-01 |
| miR_103a_3p  | 9.6E-02  | 2.7E-01  | 3.3E-01        | 2.0E-01        | 6.2E-01 | 3.0E-02        | 4.0E-02 |
| miR_106a_5p  | 3.7E-02  | 5.2E-01  | 4.2E-01        | 7.9E-01        | 7.7E-01 | 6.3E-02        | 2.6E-01 |
| miR_106b_3p  | 4.3E-01  | 5.5E-01  | 1.2E-02        | 1.9E-01        | 1.0E-01 | 7.2E-02        | 2.4E-01 |
| miR_106b_5p  | 7.6E-01  | 9.1E-01  | 6.4E-01        | 5.0E-01        | 9.6E-01 | 1.5E-01        | 2.4E-01 |
| miR_107      | 3.7E-01  | 6.9E-01  | 5.0E-01        | 5.4E-01        | 4.0E-02 | 2.7E-01        | 7.5E-02 |
| miR_10a_5p   | 2.8E-01  | 6.8E-01  | <b>7.5E-07</b> | 2.1E-01        | 2.3E-01 | 4.5E-01        | 3.1E-01 |
| miR_1178     | 8.2E-01  | 8.5E-01  | 5.8E-01        | 2.7E-01        | 4.1E-01 | 1.0E-01        | 3.4E-01 |
| miR_1180     | 1.2E-01  | 3.7E-01  | 3.2E-01        | 7.4E-03        | 3.7E-01 | 3.4E-01        | 1.4E-02 |
| miR_1201     | 6.2E-03  | 5.3E-01  | 3.8E-01        | 3.5E-03        | 8.2E-01 | 5.6E-02        | 1.3E-01 |
| miR_1227     | 4.9E-02  | 3.4E-01  | 3.3E-02        | 1.2E-01        | 1.5E-01 | 1.8E-01        | 3.2E-01 |
| miR_1236     | 7.5E-01  | 7.7E-01  | 6.3E-01        | 5.2E-01        | 9.4E-01 | 5.2E-01        | 8.1E-01 |
| miR_1244     | 7.0E-01  | 5.8E-01  | 7.7E-01        | 3.2E-01        | 9.3E-01 | 4.1E-01        | 4.5E-01 |
| miR_1248     | 3.9E-02  | 5.9E-01  | 9.8E-01        | 7.7E-03        | 9.2E-01 | 3.7E-01        | 9.0E-01 |
| miR_1249     | 1.1E-01  | 4.8E-02  | 3.0E-01        | 4.1E-02        | 8.6E-01 | 7.3E-01        | 5.9E-01 |
| miR_1254     | 5.4E-01  | 9.0E-01  | 5.4E-01        | 3.7E-01        | 6.3E-01 | 1.8E-01        | 9.1E-01 |
| miR_1255b_5p | 7.8E-01  | 2.9E-01  | 6.0E-01        | 8.0E-01        | 8.7E-01 | 4.2E-01        | 8.7E-01 |
| miR_125a_5p  | 2.1E-02  | 5.2E-01  | 5.0E-03        | 3.8E-02        | 2.0E-01 | 8.9E-02        | 2.5E-01 |
| miR_125b_5p  | 6.3E-01  | 1.6E-02  | 2.2E-01        | 9.5E-01        | 1.0E+00 | 5.3E-01        | 2.4E-01 |
| miR_126_3p   | 8.7E-01  | 9.6E-01  | 6.4E-01        | 9.4E-01        | 8.4E-01 | 2.2E-01        | 6.5E-01 |
| miR_126_5p   | 5.9E-01  | 3.7E-01  | 5.1E-02        | 3.4E-01        | 3.9E-01 | 9.9E-01        | 8.1E-01 |
| miR_1260a    | 1.3E-01  | 8.8E-01  | 1.9E-03        | 4.8E-02        | 5.5E-01 | <b>1.6E-04</b> | 4.1E-02 |
| miR_127_3p   | 1.9E-01  | 1.5E-01  | 1.0E-01        | 2.8E-01        | 6.8E-01 | 5.2E-01        | 6.6E-01 |
| miR_1270     | 1.4E-01  | 3.8E-01  | 1.2E-01        | 7.6E-02        | 6.4E-01 | 1.1E-01        | 5.3E-01 |
| miR_1275     | 6.0E-04  | 4.1E-01  | 1.9E-01        | <b>3.7E-12</b> | 5.4E-01 | 1.2E-01        | 7.1E-02 |
| miR_1276     | 7.7E-01  | 5.6E-01  | 3.5E-01        | 9.6E-01        | 6.9E-01 | 2.4E-01        | 6.8E-01 |
| miR_128      | 7.4E-02  | 1.7E-01  | 2.7E-02        | 5.2E-02        | 4.8E-01 | 1.2E-01        | 9.2E-03 |
| miR_1282     | 3.2E-01  | 6.9E-01  | 1.2E-02        | 8.5E-01        | 4.3E-01 | 8.3E-01        | 4.6E-02 |
| miR_1285_3p  | 3.0E-01  | 2.0E-01  | 8.8E-01        | 8.9E-01        | 5.7E-01 | 3.6E-02        | 2.1E-01 |
| miR_129_1_3p | 6.8E-01  | 2.9E-02  | 7.6E-01        | 3.4E-01        | 4.7E-01 | 7.0E-01        | 8.3E-01 |

|               |                |         |                |                |         |         |                |
|---------------|----------------|---------|----------------|----------------|---------|---------|----------------|
| miR_1296      | 4.7E-01        | 8.4E-01 | 7.7E-02        | 4.2E-03        | 7.2E-01 | 7.0E-01 | 4.2E-01        |
| miR_1303      | 6.3E-01        | 9.7E-01 | 6.9E-02        | 7.5E-01        | 3.0E-01 | 5.9E-01 | 1.5E-01        |
| miR_130a_3p   | 8.7E-01        | 9.8E-01 | 3.0E-01        | 3.0E-01        | 4.7E-01 | 2.0E-01 | 1.1E-01        |
| miR_130b_3p   | 2.3E-01        | 2.7E-02 | 2.3E-01        | 1.8E-01        | 2.8E-01 | 4.7E-01 | 5.5E-01        |
| miR_130b_5p   | 2.7E-01        | 4.0E-01 | 1.2E-01        | 7.5E-01        | 7.9E-01 | 1.4E-01 | 5.5E-01        |
| miR_132_3p    | 2.9E-01        | 4.3E-01 | 9.8E-03        | 2.3E-02        | 7.3E-01 | 1.8E-01 | 9.8E-03        |
| miR_133a      | 8.7E-01        | 8.8E-03 | 1.3E-03        | 4.5E-02        | 6.8E-01 | 7.5E-01 | 5.4E-01        |
| miR_134       | 3.1E-01        | 7.4E-01 | 1.9E-01        | 8.6E-01        | 9.9E-01 | 3.8E-01 | 2.6E-01        |
| miR_135a_5p   | 6.6E-01        | 6.8E-01 | 4.3E-01        | 4.0E-01        | 4.9E-01 | 4.0E-01 | 9.7E-01        |
| miR_136_3p    | 4.4E-01        | 8.4E-01 | 2.0E-01        | 4.4E-01        | 9.3E-01 | 7.1E-01 | 8.3E-01        |
| miR_138_5p    | 5.0E-01        | 6.5E-01 | 5.5E-01        | 1.1E-01        | 7.2E-01 | 1.0E+00 | 3.8E-01        |
| miR_139_3p    | 1.2E-01        | 1.2E-01 | <b>3.6E-05</b> | 4.6E-01        | 8.9E-01 | 7.5E-01 | 3.2E-01        |
| miR_139_5p    | 1.1E-01        | 8.0E-01 | <b>1.0E-04</b> | 8.3E-01        | 5.0E-01 | 5.5E-01 | 2.5E-01        |
| miR_140_3p    | 1.9E-01        | 3.6E-02 | 4.4E-01        | 5.7E-01        | 7.8E-01 | 2.7E-01 | 1.0E-01        |
| miR_140_5p    | 8.8E-01        | 2.5E-01 | 9.5E-01        | 5.5E-01        | 5.4E-01 | 6.7E-01 | 5.2E-02        |
| miR_142_3p    | 2.2E-03        | 4.4E-01 | 8.7E-02        | 6.2E-01        | 4.4E-01 | 4.2E-01 | 5.4E-02        |
| miR_142_5p    | 1.3E-01        | 3.6E-01 | 5.9E-03        | 4.8E-03        | 3.4E-01 | 4.2E-01 | 3.1E-01        |
| miR_143_3p    | 6.9E-01        | 8.3E-01 | 6.5E-02        | 2.2E-01        | 6.1E-01 | 4.9E-01 | 6.4E-02        |
| miR_144_5p    | 9.4E-02        | 1.1E-01 | 5.5E-01        | 7.4E-01        | 8.6E-01 | 4.1E-01 | 4.2E-01        |
| miR_145_3p    | 1.6E-01        | 6.7E-01 | 9.8E-01        | 7.3E-01        | 6.8E-01 | 9.0E-01 | 9.2E-01        |
| miR_145_5p    | 7.4E-02        | 2.8E-02 | <b>2.3E-06</b> | <b>4.2E-04</b> | 3.1E-01 | 1.3E-02 | 3.9E-03        |
| miR_146a_5p   | 2.7E-01        | 3.1E-01 | 2.8E-03        | 8.7E-01        | 6.7E-01 | 1.5E-02 | 3.0E-01        |
| miR_146b_3p   | 1.5E-02        | 4.3E-03 | 4.1E-02        | 9.7E-01        | 2.1E-01 | 1.3E-01 | 5.6E-01        |
| miR_146b_5p   | 1.2E-03        | 2.6E-01 | 1.2E-01        | 3.4E-01        | 5.5E-01 | 1.4E-01 | 6.3E-01        |
| miR_148a_3p   | 1.2E-01        | 6.4E-01 | 4.8E-01        | 3.8E-02        | 8.0E-01 | 6.9E-01 | 9.2E-01        |
| miR_148b_3p   | 5.2E-01        | 5.0E-01 | 8.5E-01        | 2.6E-02        | 7.1E-01 | 5.6E-01 | 6.8E-01        |
| miR_148b_5p   | 4.0E-02        | 7.9E-01 | 7.2E-02        | 4.7E-01        | 3.7E-01 | 2.2E-03 | <b>2.9E-04</b> |
| miR_149_5p    | 6.2E-01        | 4.6E-01 | 1.4E-01        | 1.6E-02        | 2.3E-02 | 4.9E-01 | 4.0E-01        |
| miR_150_5p    | <b>1.2E-04</b> | 4.8E-01 | 3.3E-02        | <b>1.7E-08</b> | 6.9E-01 | 3.7E-01 | 5.8E-01        |
| miR_151a_3p   | 7.2E-01        | 6.3E-01 | 3.5E-01        | 2.7E-01        | 9.1E-01 | 2.9E-01 | 4.6E-01        |
| miR_151a_5p   | 4.0E-01        | 6.8E-01 | 3.6E-01        | 4.3E-01        | 3.1E-01 | 2.7E-01 | 1.6E-01        |
| miR_152       | 6.8E-01        | 8.0E-03 | 1.7E-01        | 2.9E-01        | 8.8E-01 | 8.5E-02 | 2.4E-01        |
| miR_154_5p    | 7.8E-01        | 8.1E-01 | 4.6E-01        | 6.2E-01        | 7.4E-01 | 2.3E-01 | 7.7E-01        |
| miR_155_5p    | 3.3E-01        | 2.6E-01 | 9.8E-01        | 5.5E-01        | 7.6E-01 | 7.0E-03 | 4.4E-01        |
| miR_15a_3p    | 4.9E-01        | 1.1E-01 | 7.2E-01        | 7.2E-01        | 1.5E-01 | 5.6E-01 | 6.8E-01        |
| miR_15b_3p    | 1.4E-01        | 1.5E-02 | 3.8E-02        | 2.6E-01        | 6.9E-01 | 7.7E-02 | 1.5E-02        |
| miR_15b_5p    | 8.0E-01        | 8.7E-01 | 8.0E-01        | 6.8E-01        | 8.7E-01 | 4.9E-01 | 6.0E-01        |
| miR_16_1_3p   | 7.4E-02        | 3.4E-01 | 2.3E-01        | 1.1E-01        | 1.5E-01 | 2.1E-01 | 7.9E-01        |
| miR_16_5p     | 2.4E-01        | 9.2E-01 | 6.0E-01        | 3.2E-01        | 4.0E-01 | 4.0E-01 | 3.8E-01        |
| miR_17_5p     | 3.2E-01        | 3.5E-01 | 7.8E-01        | 8.9E-01        | 9.3E-01 | 2.4E-01 | 3.2E-01        |
| miR_181a_2_3p | 1.7E-01        | 6.1E-01 | 2.9E-03        | 2.7E-01        | 2.5E-01 | 8.0E-02 | 8.2E-02        |

|              |         |         |         |         |         |         |         |
|--------------|---------|---------|---------|---------|---------|---------|---------|
| miR_181a_5p  | 5.7E-02 | 8.2E-01 | 8.7E-01 | 1.8E-02 | 8.8E-01 | 3.7E-01 | 4.7E-01 |
| miR_182_5p   | 7.3E-01 | 4.5E-01 | 3.5E-01 | 5.6E-01 | 4.5E-01 | 9.1E-01 | 3.4E-01 |
| miR_183_3p   | 8.4E-01 | 9.5E-01 | 2.7E-01 | 8.2E-01 | 4.5E-01 | 1.7E-01 | 5.0E-02 |
| miR_183_5p   | 9.0E-01 | 1.8E-02 | 6.4E-01 | 2.9E-01 | 5.5E-01 | 3.0E-01 | 2.0E-01 |
| miR_184      | 4.9E-01 | 2.9E-02 | 1.7E-01 | 4.6E-01 | 2.6E-01 | 1.6E-01 | 5.8E-02 |
| miR_185_5p   | 7.8E-01 | 1.7E-02 | 5.5E-01 | 7.3E-02 | 4.0E-01 | 6.1E-02 | 9.2E-02 |
| miR_18a_3p   | 4.1E-01 | 3.0E-01 | 2.7E-01 | 1.9E-01 | 7.8E-01 | 6.1E-01 | 1.0E-01 |
| miR_190a     | 8.3E-01 | 1.7E-01 | 9.9E-01 | 2.4E-01 | 2.7E-01 | 4.1E-02 | 7.2E-02 |
| miR_191_3p   | 2.8E-01 | 8.1E-01 | 6.5E-02 | 1.1E-02 | 3.9E-01 | 2.6E-01 | 3.0E-01 |
| miR_191_5p   | 7.6E-01 | 7.5E-03 | 2.1E-02 | 1.2E-01 | 6.0E-01 | 1.9E-01 | 2.3E-02 |
| miR_192_3p   | 9.7E-01 | 2.3E-02 | 3.5E-01 | 2.3E-01 | 3.3E-02 | 5.3E-01 | 8.4E-01 |
| miR_192_5p   | 3.9E-01 | 1.0E-02 | 1.3E-01 | 1.6E-01 | 5.2E-01 | 6.1E-01 | 3.7E-01 |
| miR_193a_5p  | 5.4E-01 | 1.4E-01 | 1.1E-01 | 5.4E-04 | 8.5E-01 | 8.2E-02 | 8.5E-02 |
| miR_193b_3p  | 5.1E-05 | 8.2E-03 | 2.4E-01 | 7.7E-03 | 9.6E-01 | 8.4E-01 | 2.6E-01 |
| miR_194_5p   | 2.3E-01 | 9.8E-02 | 1.3E-01 | 9.2E-01 | 6.2E-01 | 8.3E-01 | 9.3E-01 |
| miR_195_5p   | 8.8E-01 | 7.9E-01 | 8.3E-01 | 7.4E-01 | 5.6E-01 | 2.5E-01 | 4.3E-03 |
| miR_196b_5p  | 2.5E-01 | 7.7E-01 | 2.0E-01 | 1.4E-02 | 1.3E-01 | 5.6E-01 | 8.8E-03 |
| miR_197_3p   | 3.9E-01 | 5.7E-01 | 4.9E-04 | 3.7E-04 | 8.0E-01 | 8.3E-02 | 1.4E-01 |
| miR_199a_3p  | 7.8E-01 | 1.1E-01 | 2.4E-02 | 2.7E-01 | 9.5E-01 | 6.9E-01 | 7.0E-02 |
| miR_199a_5p  | 6.8E-01 | 5.0E-01 | 3.5E-01 | 9.8E-01 | 4.9E-01 | 1.6E-01 | 2.8E-01 |
| miR_19a_3p   | 2.7E-01 | 5.1E-01 | 1.0E-02 | 7.2E-02 | 8.2E-01 | 1.2E-01 | 1.6E-01 |
| miR_19b_1_5p | 4.5E-01 | 2.1E-01 | 7.3E-01 | 9.1E-02 | 2.2E-02 | 2.1E-01 | 5.8E-01 |
| miR_19b_3p   | 1.5E-01 | 2.1E-01 | 5.5E-01 | 8.1E-01 | 7.9E-01 | 1.2E-01 | 1.1E-01 |
| miR_200c_3p  | 5.3E-01 | 1.5E-01 | 2.2E-01 | 2.6E-01 | 6.8E-01 | 4.9E-01 | 3.4E-01 |
| miR_204_5p   | 5.5E-01 | 7.8E-01 | 3.3E-02 | 8.5E-01 | 3.3E-01 | 1.4E-01 | 5.0E-01 |
| miR_206      | 8.2E-01 | 6.9E-01 | 9.7E-02 | 9.8E-01 | 7.2E-01 | 9.5E-01 | 5.8E-01 |
| miR_20a_3p   | 9.6E-01 | 8.1E-01 | 6.5E-01 | 6.2E-01 | 3.7E-01 | 2.1E-01 | 8.5E-01 |
| miR_20a_5p   | 2.4E-01 | 2.5E-01 | 7.3E-01 | 8.4E-01 | 8.8E-01 | 7.7E-02 | 5.1E-01 |
| miR_20b_3p   | 4.0E-01 | 7.7E-01 | 9.5E-01 | 4.3E-01 | 6.5E-01 | 6.3E-01 | 5.2E-01 |
| miR_20b_5p   | 1.2E-01 | 8.5E-01 | 5.6E-01 | 4.3E-01 | 8.9E-01 | 5.1E-02 | 1.2E-01 |
| miR_210      | 6.0E-01 | 3.3E-01 | 8.6E-01 | 3.6E-02 | 9.3E-01 | 2.1E-01 | 7.8E-01 |
| miR_211_5p   | 5.5E-02 | 1.5E-02 | 1.4E-01 | 2.3E-01 | 6.2E-01 | 9.4E-01 | 6.1E-01 |
| miR_212_3p   | 4.0E-02 | 1.3E-01 | 1.2E-02 | 6.3E-01 | 7.7E-01 | 9.4E-01 | 6.0E-01 |
| miR_213      | 4.7E-01 | 2.4E-02 | 3.9E-02 | 3.5E-01 | 4.6E-01 | 2.9E-01 | 2.8E-01 |
| miR_216b     | 3.5E-01 | 3.0E-01 | 8.2E-01 | 2.4E-02 | 5.9E-02 | 9.9E-01 | 2.0E-01 |
| miR_218_5p   | 2.3E-01 | 4.9E-02 | 4.0E-02 | 6.6E-01 | 2.4E-01 | 8.5E-03 | 1.1E-03 |
| miR_219_1_3p | 1.7E-01 | 7.4E-01 | 7.6E-01 | 1.1E-01 | 2.7E-01 | 1.4E-01 | 2.8E-02 |
| miR_22_3p    | 6.7E-01 | 9.5E-01 | 4.8E-01 | 3.5E-02 | 5.9E-02 | 5.2E-03 | 3.2E-02 |
| miR_22_5p    | 9.0E-01 | 6.6E-01 | 7.9E-02 | 5.2E-02 | 3.6E-01 | 7.6E-01 | 4.2E-01 |
| miR_221_3p   | 2.6E-01 | 6.0E-01 | 3.9E-04 | 7.3E-02 | 8.0E-01 | 2.4E-01 | 4.5E-01 |
| miR_222_3p   | 6.3E-01 | 2.8E-01 | 4.5E-02 | 1.6E-01 | 9.5E-01 | 2.0E-01 | 4.1E-01 |

|              |                |         |                |                |         |         |         |
|--------------|----------------|---------|----------------|----------------|---------|---------|---------|
| miR_223_3p   | 4.7E-02        | 6.8E-03 | 1.3E-02        | 7.8E-02        | 9.3E-01 | 3.7E-01 | 4.4E-01 |
| miR_223_5p   | 1.7E-01        | 2.5E-01 | 5.9E-01        | 6.4E-02        | 3.0E-01 | 9.5E-03 | 6.4E-01 |
| miR_224_5p   | 9.1E-01        | 9.8E-01 | 3.9E-02        | 4.8E-01        | 9.7E-02 | 7.1E-01 | 3.1E-01 |
| miR_23a_5p   | 6.2E-01        | 3.4E-01 | 7.6E-01        | 1.2E-01        | 5.6E-01 | 6.6E-01 | 8.1E-01 |
| miR_24_2_5p  | 9.3E-01        | 9.7E-01 | 3.7E-01        | 5.0E-02        | 1.1E-01 | 2.1E-01 | 3.5E-01 |
| miR_24_3p    | 1.9E-01        | 6.2E-01 | 1.0E-01        | 2.5E-01        | 9.7E-01 | 2.1E-02 | 8.2E-02 |
| miR_25_3p    | 5.7E-02        | 5.5E-01 | 9.7E-01        | 5.9E-01        | 4.5E-01 | 4.7E-01 | 1.4E-01 |
| miR_25_5p    | <b>4.7E-05</b> | 5.3E-01 | 4.3E-02        | 1.8E-02        | 3.1E-02 | 1.4E-01 | 5.3E-01 |
| miR_26a_1_3p | 4.4E-02        | 4.3E-02 | 4.8E-01        | 7.1E-01        | 4.4E-01 | 2.1E-01 | 7.1E-01 |
| miR_26a_5p   | 1.8E-01        | 1.4E-01 | 1.6E-01        | 4.9E-01        | 3.4E-01 | 3.8E-01 | 2.3E-02 |
| miR_26b_3p   | <b>3.7E-06</b> | 1.5E-01 | 9.0E-03        | 5.1E-01        | 8.9E-01 | 9.6E-02 | 3.3E-01 |
| miR_26b_5p   | 8.8E-01        | 3.7E-01 | 1.5E-02        | 5.9E-01        | 3.1E-01 | 1.4E-01 | 7.5E-02 |
| miR_27a_3p   | 1.7E-02        | 4.9E-01 | 1.4E-03        | 8.4E-02        | 2.3E-01 | 2.4E-02 | 4.5E-02 |
| miR_27a_5p   | 7.3E-01        | 4.6E-01 | 5.8E-01        | 3.3E-02        | 8.9E-01 | 3.0E-01 | 6.7E-01 |
| miR_27b_3p   | 3.3E-02        | 7.3E-01 | 1.4E-01        | 4.0E-01        | 1.0E-02 | 6.2E-01 | 5.6E-01 |
| miR_28_3p    | 9.8E-03        | 8.6E-01 | <b>8.7E-05</b> | 4.5E-01        | 9.0E-01 | 2.4E-02 | 2.0E-01 |
| miR_28_5p    | 4.4E-02        | 1.8E-01 | 1.3E-01        | 4.7E-01        | 6.8E-01 | 1.2E-01 | 3.2E-01 |
| miR_296_5p   | 3.4E-01        | 2.5E-01 | 7.0E-01        | 7.3E-01        | 4.9E-01 | 7.2E-01 | 2.2E-02 |
| miR_29a_3p   | 1.4E-01        | 9.7E-01 | 7.0E-03        | 7.9E-01        | 9.2E-01 | 4.1E-02 | 2.3E-01 |
| miR_29a_5p   | 6.7E-01        | 9.6E-01 | 2.3E-02        | 2.0E-01        | 5.0E-01 | 7.5E-01 | 4.7E-01 |
| miR_29b_2_5p | 1.1E-01        | 6.8E-01 | 6.5E-01        | 7.6E-02        | 4.7E-01 | 3.0E-01 | 7.9E-01 |
| miR_29c_3p   | 6.2E-01        | 2.3E-01 | 2.1E-01        | 3.4E-01        | 7.7E-01 | 9.0E-02 | 2.9E-01 |
| miR_29c_5p   | 1.9E-02        | 3.7E-01 | 7.5E-02        | 3.1E-02        | 6.2E-01 | 2.2E-02 | 1.3E-01 |
| miR_301a_3p  | 1.4E-02        | 7.6E-01 | 7.6E-01        | 2.3E-01        | 5.3E-01 | 1.9E-01 | 2.3E-01 |
| miR_302c_3p  | 4.8E-02        | 1.4E-01 | 6.0E-01        | 2.5E-01        | 3.1E-01 | 6.7E-01 | 6.1E-02 |
| miR_30a_3p   | 3.2E-01        | 1.6E-01 | 5.2E-01        | 5.1E-01        | 8.1E-02 | 2.7E-01 | 8.2E-01 |
| miR_30a_5p   | 2.7E-01        | 9.1E-01 | 5.2E-02        | 1.3E-01        | 2.2E-01 | 3.8E-02 | 4.1E-02 |
| miR_30b_5p   | 5.1E-01        | 1.7E-01 | 2.1E-01        | 3.2E-01        | 6.5E-01 | 2.0E-01 | 4.6E-02 |
| miR_30c_5p   | 2.6E-01        | 1.3E-01 | 2.4E-01        | 4.7E-01        | 9.9E-01 | 4.7E-01 | 6.8E-02 |
| miR_30d_5p   | 9.7E-01        | 5.3E-01 | 1.0E-01        | 4.4E-01        | 8.8E-01 | 2.6E-01 | 4.5E-02 |
| miR_30e_3p   | 9.4E-02        | 9.3E-01 | 1.8E-02        | 6.4E-02        | 3.0E-01 | 5.3E-02 | 2.9E-02 |
| miR_31_3p    | 8.6E-01        | 2.5E-01 | 4.1E-02        | 1.3E-02        | 5.7E-01 | 2.6E-01 | 8.5E-01 |
| miR_31_5p    | 8.5E-01        | 1.8E-01 | 4.9E-03        | <b>2.1E-04</b> | 2.3E-03 | 1.8E-01 | 9.6E-01 |
| miR_320a     | 8.3E-02        | 3.4E-01 | 5.4E-01        | 1.4E-01        | 7.9E-01 | 3.6E-01 | 3.0E-01 |
| miR_320b     | 8.0E-01        | 6.6E-01 | 2.1E-01        | 4.2E-01        | 3.7E-01 | 5.7E-01 | 2.5E-01 |
| miR_323a_3p  | 9.8E-01        | 1.9E-01 | 1.5E-02        | 1.6E-01        | 1.5E-01 | 5.7E-01 | 1.6E-01 |
| miR_324_3p   | 9.6E-01        | 2.0E-01 | 3.1E-01        | 3.4E-02        | 9.5E-01 | 1.7E-01 | 2.0E-01 |
| miR_324_5p   | 5.6E-01        | 3.2E-02 | 4.6E-01        | 2.8E-02        | 8.1E-01 | 1.3E-01 | 5.1E-02 |
| miR_328      | 4.7E-02        | 4.4E-01 | 1.7E-03        | 2.4E-02        | 4.0E-01 | 6.8E-01 | 1.2E-01 |
| miR_329      | 9.0E-01        | 5.9E-01 | 3.3E-01        | 8.8E-01        | 9.7E-01 | 1.1E-01 | 3.6E-01 |
| miR_330_3p   | 9.2E-01        | 1.5E-01 | 7.9E-03        | 4.6E-02        | 9.9E-01 | 1.9E-01 | 4.6E-02 |

|             |         |         |         |                |         |         |         |
|-------------|---------|---------|---------|----------------|---------|---------|---------|
| miR_331_3p  | 4.6E-01 | 3.1E-01 | 3.3E-02 | 2.0E-01        | 6.3E-01 | 3.2E-01 | 1.4E-01 |
| miR_331_5p  | 4.4E-01 | 3.0E-01 | 9.6E-03 | 7.5E-01        | 6.7E-01 | 9.1E-01 | 5.3E-01 |
| miR_335_3p  | 3.5E-01 | 2.3E-02 | 3.3E-01 | 3.1E-01        | 6.8E-01 | 6.0E-01 | 2.7E-01 |
| miR_335_5p  | 5.1E-01 | 6.5E-02 | 1.1E-01 | 2.0E-01        | 2.9E-01 | 6.7E-01 | 6.3E-01 |
| miR_337_3p  | 2.6E-01 | 4.0E-02 | 8.4E-01 | 9.5E-01        | 1.3E-01 | 5.1E-01 | 9.3E-01 |
| miR_339_3p  | 1.7E-01 | 1.4E-02 | 8.3E-01 | 1.4E-01        | 7.9E-01 | 1.2E-01 | 9.1E-01 |
| miR_339_5p  | 9.5E-01 | 5.2E-01 | 3.5E-01 | 3.6E-01        | 7.7E-01 | 7.1E-01 | 4.5E-01 |
| miR_340_3p  | 1.7E-01 | 8.3E-02 | 8.3E-02 | 1.5E-01        | 5.3E-01 | 2.9E-01 | 3.8E-01 |
| miR_340_5p  | 6.1E-01 | 5.6E-01 | 5.4E-01 | 1.1E-01        | 7.8E-02 | 7.4E-01 | 6.2E-01 |
| miR_342_3p  | 6.4E-02 | 4.3E-01 | 2.4E-03 | 2.6E-01        | 7.4E-01 | 2.9E-01 | 6.4E-01 |
| miR_345_5p  | 6.1E-03 | 2.9E-01 | 5.6E-02 | 1.6E-02        | 1.7E-01 | 2.3E-01 | 5.1E-01 |
| miR_34b_3p  | 1.2E-01 | 1.7E-02 | 5.4E-01 | 4.3E-02        | 6.1E-02 | 7.1E-01 | 1.5E-02 |
| miR_361_5p  | 8.3E-01 | 2.2E-01 | 5.8E-03 | 5.8E-03        | 7.5E-01 | 6.4E-01 | 7.9E-01 |
| miR_362_5p  | 7.2E-01 | 2.3E-01 | 5.3E-01 | 1.1E-02        | 6.8E-01 | 2.1E-01 | 5.1E-01 |
| miR_363_3p  | 5.8E-02 | 3.7E-01 | 2.2E-01 | 7.9E-01        | 5.0E-01 | 1.5E-01 | 9.8E-02 |
| miR_363_5p  | 1.5E-01 | 4.6E-01 | 5.7E-01 | 8.4E-01        | 1.8E-01 | 2.2E-01 | 4.6E-01 |
| miR_365a_3p | 6.0E-01 | 2.5E-01 | 7.2E-02 | <b>4.1E-04</b> | 2.0E-01 | 5.3E-01 | 9.8E-01 |
| miR_370     | 3.0E-01 | 2.0E-01 | 1.3E-01 | 4.5E-01        | 5.5E-01 | 7.5E-01 | 1.2E-02 |
| miR_374a_5p | 8.1E-01 | 2.3E-01 | 5.9E-01 | 9.2E-01        | 9.3E-01 | 9.7E-01 | 5.6E-01 |
| miR_374b_5p | 5.6E-01 | 5.1E-01 | 8.0E-01 | 9.4E-01        | 7.3E-01 | 4.1E-01 | 8.3E-02 |
| miR_375     | 2.2E-01 | 9.0E-01 | 6.1E-01 | 9.5E-01        | 8.0E-01 | 1.1E-01 | 2.4E-01 |
| miR_376a_3p | 7.0E-03 | 3.6E-01 | 9.2E-03 | 9.8E-01        | 4.2E-01 | 9.2E-01 | 2.0E-01 |
| miR_376c    | 1.9E-01 | 2.3E-03 | 8.3E-01 | 3.4E-01        | 9.6E-01 | 5.4E-01 | 1.6E-01 |
| miR_378a_3p | 9.1E-01 | 7.0E-01 | 5.3E-01 | 4.2E-01        | 7.2E-01 | 6.3E-01 | 1.7E-01 |
| miR_378a_5p | 1.7E-01 | 2.0E-01 | 7.9E-01 | 5.9E-02        | 9.2E-01 | 4.5E-01 | 1.4E-02 |
| miR_382_5p  | 7.6E-01 | 9.8E-01 | 4.2E-01 | 2.6E-01        | 9.9E-01 | 8.5E-01 | 2.5E-03 |
| miR_409_3p  | 6.2E-01 | 1.7E-01 | 1.3E-03 | 3.3E-01        | 7.1E-01 | 1.1E-01 | 2.5E-01 |
| miR_410     | 8.3E-01 | 3.4E-01 | 4.7E-02 | 5.1E-01        | 8.9E-01 | 7.6E-01 | 2.5E-01 |
| miR_411_3p  | 2.2E-02 | 9.8E-02 | 8.0E-01 | 5.1E-01        | 3.2E-01 | 9.9E-01 | 1.6E-01 |
| miR_422a    | 8.4E-01 | 2.6E-01 | 3.7E-01 | 5.9E-02        | 5.9E-01 | 7.6E-01 | 1.0E-01 |
| miR_423_5p  | 2.2E-02 | 1.9E-01 | 1.4E-01 | 1.3E-03        | 5.9E-01 | 1.8E-01 | 1.3E-01 |
| miR_424_3p  | 8.7E-01 | 9.8E-01 | 4.6E-01 | 1.3E-01        | 5.7E-01 | 5.7E-01 | 3.8E-01 |
| miR_425_3p  | 7.1E-01 | 1.7E-02 | 2.0E-02 | 9.7E-02        | 5.7E-01 | 3.2E-02 | 1.7E-01 |
| miR_431_5p  | 2.3E-02 | 3.2E-01 | 7.4E-01 | 9.3E-01        | 1.8E-02 | 7.1E-01 | 8.0E-01 |
| miR_432_5p  | 2.8E-02 | 3.4E-01 | 1.6E-01 | 7.3E-01        | 9.4E-02 | 7.4E-01 | 4.0E-01 |
| miR_433     | 1.7E-02 | 1.1E-01 | 4.8E-01 | 7.9E-01        | 1.7E-01 | 7.9E-01 | 2.6E-01 |
| miR_451a    | 4.1E-03 | 1.2E-01 | 6.1E-01 | 3.5E-01        | 5.3E-01 | 5.7E-01 | 4.9E-01 |
| miR_454_3p  | 8.7E-01 | 9.1E-01 | 6.7E-01 | 6.7E-01        | 9.2E-01 | 1.3E-01 | 7.6E-01 |
| miR_454_5p  | 5.2E-01 | 4.8E-01 | 1.9E-01 | 4.9E-01        | 3.6E-01 | 1.8E-01 | 5.0E-02 |
| miR_483_3p  | 5.4E-01 | 3.6E-01 | 7.9E-02 | 6.4E-01        | 2.6E-01 | 1.6E-03 | 5.7E-01 |
| miR_483_5p  | 8.9E-01 | 2.3E-01 | 3.1E-01 | 4.9E-01        | 6.9E-01 | 6.6E-01 | 9.8E-01 |



|             |         |                |         |         |         |         |         |
|-------------|---------|----------------|---------|---------|---------|---------|---------|
| miR_484     | 2.4E-02 | 7.3E-01        | 6.7E-01 | 2.3E-01 | 1.0E-01 | 1.4E-01 | 1.8E-01 |
| miR_485_3p  | 5.4E-01 | 5.4E-01        | 5.7E-01 | 4.5E-01 | 9.6E-01 | 4.8E-01 | 4.4E-01 |
| miR_486_3p  | 7.0E-03 | 1.9E-01        | 8.3E-01 | 1.5E-02 | 3.9E-01 | 7.6E-01 | 8.4E-02 |
| miR_487b    | 1.2E-01 | 5.8E-02        | 4.8E-01 | 9.9E-01 | 1.5E-01 | 3.2E-01 | 7.6E-01 |
| miR_491_5p  | 8.2E-01 | 5.8E-01        | 3.9E-01 | 2.2E-01 | 4.4E-01 | 8.1E-01 | 7.4E-01 |
| miR_494     | 6.5E-02 | 2.3E-02        | 3.3E-02 | 9.0E-01 | 2.1E-01 | 4.2E-01 | 5.7E-01 |
| miR_495     | 2.0E-02 | 4.0E-01        | 6.3E-02 | 3.9E-01 | 5.7E-01 | 2.7E-01 | 8.5E-01 |
| miR_500a_3p | 2.2E-01 | 4.4E-01        | 3.7E-01 | 6.4E-02 | 1.0E+00 | 5.7E-01 | 9.3E-01 |
| miR_500a_5p | 6.5E-01 | 5.6E-02        | 8.0E-01 | 1.5E-01 | 6.9E-01 | 5.4E-02 | 7.2E-03 |
| miR_501_3p  | 5.8E-03 | 9.0E-02        | 7.1E-02 | 1.4E-01 | 6.7E-01 | 8.8E-01 | 1.8E-01 |
| miR_502_3p  | 8.7E-01 | 1.3E-01        | 9.8E-01 | 3.3E-01 | 3.0E-01 | 9.3E-02 | 1.8E-02 |
| miR_502_5p  | 6.2E-01 | 8.6E-01        | 6.7E-01 | 3.3E-02 | 3.9E-01 | 7.9E-01 | 5.5E-01 |
| miR_504     | 1.4E-02 | 2.5E-01        | 9.2E-01 | 1.6E-01 | 1.9E-03 | 5.3E-01 | 1.8E-02 |
| miR_505_3p  | 9.3E-01 | 7.6E-01        | 4.9E-01 | 1.2E-01 | 7.5E-01 | 6.8E-01 | 6.0E-01 |
| miR_505_5p  | 4.2E-01 | 1.8E-01        | 3.7E-01 | 9.8E-02 | 9.9E-01 | 2.3E-01 | 5.4E-01 |
| miR_511     | 9.2E-01 | 3.1E-02        | 1.2E-01 | 6.1E-01 | 4.7E-01 | 9.4E-01 | 1.5E-01 |
| miR_520f    | 2.0E-01 | 1.1E-01        | 5.2E-01 | 7.9E-01 | 6.6E-01 | 4.4E-01 | 4.2E-01 |
| miR_532_3p  | 5.5E-01 | 1.7E-01        | 2.2E-01 | 3.5E-01 | 3.8E-01 | 9.2E-02 | 3.1E-02 |
| miR_532_5p  | 5.3E-01 | 1.0E-01        | 8.2E-01 | 3.5E-01 | 2.8E-01 | 4.0E-02 | 1.1E-01 |
| miR_539_5p  | 9.4E-01 | 3.1E-02        | 2.7E-01 | 3.7E-01 | 3.5E-01 | 5.0E-01 | 2.3E-02 |
| miR_542_3p  | 3.3E-01 | 4.1E-01        | 2.2E-01 | 5.2E-01 | 1.2E-02 | 7.2E-01 | 2.3E-02 |
| miR_543     | 6.4E-03 | 2.3E-02        | 1.4E-01 | 6.1E-01 | 1.6E-01 | 9.0E-01 | 8.8E-01 |
| miR_548d_3p | 8.9E-01 | <b>4.8E-04</b> | 9.8E-02 | 2.1E-01 | 1.5E-01 | 7.7E-01 | 2.9E-01 |
| miR_550     | 1.6E-01 | 1.3E-02        | 8.2E-01 | 8.5E-01 | 3.8E-01 | 7.1E-02 | 5.8E-02 |
| miR_574_3p  | 9.8E-01 | 7.6E-01        | 2.2E-02 | 6.7E-02 | 8.5E-01 | 8.2E-01 | 6.8E-01 |
| miR_576_3p  | 7.7E-01 | 7.5E-01        | 2.0E-01 | 2.4E-01 | 1.7E-01 | 9.4E-01 | 5.5E-01 |
| miR_581     | 2.4E-01 | 2.2E-01        | 2.4E-01 | 4.8E-01 | 6.4E-01 | 4.6E-01 | 3.3E-01 |
| miR_584_5p  | 7.4E-02 | 7.6E-01        | 8.8E-01 | 7.3E-01 | 7.3E-01 | 8.3E-01 | 9.2E-01 |
| miR_589_3p  | 6.4E-01 | 4.8E-01        | 1.1E-01 | 6.1E-02 | 6.3E-01 | 2.1E-01 | 8.8E-02 |
| miR_589_5p  | 7.3E-01 | 9.5E-02        | 7.5E-01 | 5.4E-01 | 6.9E-01 | 4.3E-01 | 3.2E-01 |
| miR_590_5p  | 8.3E-01 | 1.0E+00        | 1.3E-01 | 3.7E-01 | 4.9E-01 | 7.4E-01 | 4.2E-01 |
| miR_598     | 3.0E-01 | 1.2E-01        | 6.6E-01 | 2.7E-01 | 7.8E-01 | 6.5E-01 | 9.1E-01 |
| miR_601     | 1.3E-01 | 6.4E-01        | 1.5E-01 | 9.2E-01 | 8.3E-01 | 4.9E-01 | 1.2E-01 |
| miR_616_3p  | 1.2E-01 | 5.1E-01        | 5.7E-01 | 1.1E-01 | 5.9E-01 | 8.9E-01 | 3.9E-01 |
| miR_616_5p  | 1.6E-01 | 3.0E-01        | 1.0E-01 | 5.0E-02 | 2.6E-02 | 9.1E-02 | 3.1E-02 |
| miR_624_5p  | 4.8E-01 | 5.5E-01        | 7.5E-01 | 4.3E-01 | 5.2E-01 | 1.4E-01 | 8.4E-02 |
| miR_625_3p  | 1.2E-01 | 7.5E-02        | 1.4E-02 | 8.0E-02 | 5.6E-01 | 1.5E-01 | 5.8E-01 |
| miR_625_5p  | 4.4E-01 | 1.9E-01        | 3.6E-01 | 2.8E-01 | 4.4E-01 | 6.3E-01 | 5.2E-01 |
| miR_628_3p  | 1.3E-01 | 6.7E-01        | 8.1E-01 | 5.2E-01 | 6.5E-01 | 1.9E-01 | 4.2E-01 |
| miR_629_3p  | 9.0E-01 | 1.4E-01        | 2.2E-03 | 1.5E-01 | 2.9E-01 | 3.7E-02 | 1.4E-01 |
| miR_629_5p  | 7.5E-01 | 1.3E-01        | 8.8E-01 | 4.8E-01 | 2.3E-01 | 5.2E-02 | 5.9E-01 |

|             |                |         |                |         |         |                |                |
|-------------|----------------|---------|----------------|---------|---------|----------------|----------------|
| miR_636     | 8.1E-01        | 4.9E-01 | 5.4E-01        | 4.2E-02 | 6.7E-02 | 7.5E-01        | 6.2E-01        |
| miR_642a_5p | 2.3E-03        | 4.5E-01 | 5.9E-03        | 4.4E-03 | 3.0E-01 | <b>8.9E-12</b> | <b>5.3E-04</b> |
| miR_652_3p  | 5.6E-01        | 5.9E-01 | 2.8E-01        | 6.8E-01 | 8.8E-01 | 1.4E-01        | 6.8E-01        |
| miR_654_5p  | 4.1E-01        | 4.1E-01 | 4.8E-02        | 4.4E-01 | 9.0E-01 | 7.0E-01        | 6.3E-02        |
| miR_660_5p  | 6.7E-02        | 9.4E-02 | 3.7E-01        | 5.1E-01 | 9.5E-02 | 2.7E-01        | 6.6E-02        |
| miR_664_3p  | 7.8E-01        | 1.9E-01 | 1.4E-02        | 3.4E-01 | 7.9E-01 | 4.6E-03        | 1.1E-02        |
| miR_668     | 7.8E-01        | 5.4E-01 | 1.7E-02        | 4.1E-01 | 7.3E-01 | 4.4E-01        | 3.6E-01        |
| miR_671_3p  | <b>6.2E-05</b> | 5.0E-01 | <b>1.2E-06</b> | 2.6E-01 | 1.6E-01 | 1.4E-01        | 6.8E-02        |
| miR_7_1_3p  | 5.2E-01        | 2.3E-01 | 2.3E-01        | 6.2E-01 | 8.9E-01 | 2.6E-01        | 8.9E-02        |
| miR_7_2_3p  | 5.4E-01        | 9.3E-01 | 5.7E-02        | 4.0E-01 | 6.2E-01 | 9.4E-01        | 9.8E-01        |
| miR_7_5p    | 4.0E-01        | 2.0E-01 | 5.4E-01        | 6.4E-02 | 4.9E-01 | 5.7E-02        | 9.2E-01        |
| miR_720     | 6.2E-02        | 2.6E-01 | 7.6E-02        | 7.1E-02 | 8.7E-01 | <b>1.5E-04</b> | 5.5E-02        |
| miR_744_3p  | 9.6E-01        | 1.2E-02 | 8.4E-04        | 3.9E-02 | 2.6E-02 | 1.1E-01        | 1.2E-01        |
| miR_744_5p  | 8.0E-01        | 2.5E-01 | 2.1E-01        | 1.0E-02 | 7.7E-01 | 9.4E-02        | 9.0E-02        |
| miR_758     | 8.0E-02        | 5.4E-03 | 5.3E-02        | 9.8E-01 | 7.9E-01 | 5.8E-01        | 7.1E-01        |
| miR_766_3p  | 5.7E-01        | 1.9E-01 | <b>5.0E-06</b> | 1.8E-01 | 3.8E-01 | 3.5E-02        | 9.9E-03        |
| miR_769_5p  | 4.9E-01        | 8.5E-01 | 4.6E-02        | 5.1E-03 | 1.6E-01 | 5.1E-01        | 4.8E-01        |
| miR_885_5p  | 6.9E-01        | 3.6E-01 | 1.7E-02        | 8.6E-01 | 1.6E-01 | 5.2E-02        | 4.0E-02        |
| miR_9_3p    | 8.1E-01        | 3.0E-01 | 2.9E-01        | 8.1E-01 | 4.2E-01 | 3.2E-01        | 4.2E-01        |
| miR_92a_3p  | 9.8E-01        | 8.4E-01 | 6.5E-01        | 3.6E-01 | 9.6E-01 | 3.9E-01        | 1.3E-01        |
| miR_93_3p   | 8.1E-01        | 1.4E-01 | 3.3E-02        | 8.6E-02 | 2.4E-01 | 2.8E-02        | 1.4E-02        |
| miR_93_5p   | 2.4E-01        | 5.0E-01 | 9.9E-01        | 4.6E-01 | 8.4E-01 | 3.6E-02        | 5.6E-01        |
| miR_939     | 5.8E-01        | 5.6E-01 | 2.3E-02        | 7.6E-01 | 4.0E-01 | 1.0E-01        | 1.5E-01        |
| miR_941     | 7.1E-01        | 6.8E-01 | 9.4E-01        | 8.1E-03 | 9.5E-03 | 3.1E-01        | 3.4E-01        |
| miR_942     | 3.5E-01        | 8.6E-01 | 1.8E-02        | 3.1E-01 | 8.6E-01 | 3.4E-01        | 4.6E-02        |
| miR_943     | 7.6E-01        | 1.7E-01 | 5.2E-01        | 8.8E-01 | 7.3E-01 | 6.4E-01        | 9.7E-01        |
| miR_99b_3p  | 5.6E-02        | 8.1E-01 | 3.0E-01        | 7.9E-01 | 3.3E-01 | 6.6E-01        | 1.7E-01        |
| miR_99b_5p  | 5.3E-02        | 5.2E-01 | 1.2E-01        | 7.6E-01 | 6.8E-01 | 6.1E-01        | 4.4E-01        |

WBC is white blood cell; RBC is red blood cell; PLT is platelet; LY is lymphocyte; MO is monocyte; EO is eosinophil; and BA is basophil;

The corresponding p value for Benjamini-Hochberg methods corrected FDR=0.05 is 6.0e-4. Highlighted p value is passing FDR<0.05.

**Supplementary Table III: *cis*-miR-eSNPs at FDR<5%.**

| snpID      | miRNA-FHS   | pValue  | Rsquare | CisMark | BH_FDR  |
|------------|-------------|---------|---------|---------|---------|
| rs10892855 | miR-100-5p  | <1E-16  | 0.23    | cis     | <1E-16  |
| rs12223035 | miR-100-5p  | <1E-16  | 0.23    | cis     | <1E-16  |
| rs1450796  | miR-100-5p  | <1E-16  | 0.23    | cis     | <1E-16  |
| rs11218651 | miR-100-5p  | <1E-16  | 0.23    | cis     | <1E-16  |
| rs2084637  | miR-100-5p  | <1E-16  | 0.23    | cis     | <1E-16  |
| rs11218646 | miR-100-5p  | <1E-16  | 0.23    | cis     | <1E-16  |
| rs10892855 | miR-125b-5p | <1E-16  | 0.17    | cis     | <1E-16  |
| rs12223035 | miR-125b-5p | <1E-16  | 0.17    | cis     | <1E-16  |
| rs1450796  | miR-125b-5p | <1E-16  | 0.17    | cis     | <1E-16  |
| rs11218651 | miR-125b-5p | <1E-16  | 0.17    | cis     | <1E-16  |
| rs2084637  | miR-125b-5p | <1E-16  | 0.17    | cis     | <1E-16  |
| rs11218646 | miR-125b-5p | <1E-16  | 0.18    | cis     | <1E-16  |
| rs6062278  | miR-133a    | 1.1E-12 | 0.13    | cis     | 9.8E-08 |
| rs3934574  | miR-133a    | 1.2E-12 | 0.13    | cis     | 1.0E-07 |
| rs6062277  | miR-133a    | 1.7E-12 | 0.12    | cis     | 1.4E-07 |
| rs7110361  | miR-100-5p  | 4.0E-12 | 0.13    | cis     | 3.0E-07 |
| rs7110230  | miR-100-5p  | 5.6E-12 | 0.13    | cis     | 3.5E-07 |
| rs4123597  | miR-100-5p  | 5.1E-12 | 0.13    | cis     | 3.5E-07 |
| rs6061576  | miR-133a    | 5.1E-12 | 0.12    | cis     | 3.5E-07 |
| rs4935796  | miR-100-5p  | 2.3E-11 | 0.12    | cis     | 1.1E-06 |
| rs11218648 | miR-100-5p  | 2.3E-11 | 0.12    | cis     | 1.1E-06 |
| rs7937803  | miR-100-5p  | 2.2E-11 | 0.12    | cis     | 1.2E-06 |
| rs7938375  | miR-100-5p  | 2.2E-11 | 0.12    | cis     | 1.2E-06 |
| rs11906462 | miR-133a    | 2.0E-11 | 0.11    | cis     | 1.2E-06 |
| rs1839544  | miR-100-5p  | 2.2E-11 | 0.12    | cis     | 1.3E-06 |
| rs6062267  | miR-133a    | 3.0E-11 | 0.11    | cis     | 1.4E-06 |
| rs4123597  | miR-125b-5p | 9.3E-11 | 0.11    | cis     | 4.1E-06 |
| rs7110361  | miR-125b-5p | 9.7E-11 | 0.11    | cis     | 4.2E-06 |
| rs7110230  | miR-125b-5p | 1.2E-10 | 0.10    | cis     | 5.1E-06 |
| rs11763020 | miR-339-5p  | 1.8E-10 | 0.10    | cis     | 6.9E-06 |
| rs6951245  | miR-339-5p  | 1.8E-10 | 0.10    | cis     | 7.0E-06 |
| rs2363286  | miR-339-5p  | 2.2E-10 | 0.10    | cis     | 8.1E-06 |
| rs1997243  | miR-339-5p  | 2.2E-10 | 0.10    | cis     | 8.3E-06 |
| rs1133122  | miR-339-5p  | 5.4E-10 | 0.10    | cis     | 1.9E-05 |
| rs4724725  | miR-339-5p  | 1.6E-09 | 0.09    | cis     | 5.4E-05 |
| rs9364166  | miR-30a-3p  | 3.0E-09 | 0.18    | cis     | 7.6E-05 |
| rs9364165  | miR-30a-3p  | 2.9E-09 | 0.18    | cis     | 7.6E-05 |
| rs1839545  | miR-100-5p  | 2.9E-09 | 0.09    | cis     | 7.8E-05 |
| rs12701834 | miR-339-5p  | 2.3E-09 | 0.09    | cis     | 7.8E-05 |

|            |             |         |      |     |         |
|------------|-------------|---------|------|-----|---------|
| rs9364167  | miR-30a-3p  | 2.9E-09 | 0.18 | cis | 8.0E-05 |
| rs17126624 | miR-100-5p  | 2.9E-09 | 0.09 | cis | 8.0E-05 |
| rs4935797  | miR-100-5p  | 2.9E-09 | 0.09 | cis | 8.0E-05 |
| rs6589928  | miR-100-5p  | 3.2E-09 | 0.09 | cis | 8.1E-05 |
| rs6589923  | miR-100-5p  | 3.3E-09 | 0.09 | cis | 8.1E-05 |
| rs1901184  | miR-100-5p  | 2.6E-09 | 0.10 | cis | 8.3E-05 |
| rs11218652 | miR-100-5p  | 2.8E-09 | 0.09 | cis | 8.3E-05 |
| rs7110089  | miR-100-5p  | 2.8E-09 | 0.09 | cis | 8.4E-05 |
| rs7114509  | miR-100-5p  | 2.6E-09 | 0.10 | cis | 8.4E-05 |
| rs7124646  | miR-100-5p  | 2.8E-09 | 0.09 | cis | 8.5E-05 |
| rs10275401 | miR-339-5p  | 3.9E-09 | 0.09 | cis | 9.2E-05 |
| rs9346470  | miR-30a-3p  | 3.9E-09 | 0.17 | cis | 9.4E-05 |
| rs9351811  | miR-30a-3p  | 5.4E-09 | 0.17 | cis | 1.2E-04 |
| rs763354   | miR-30a-3p  | 7.0E-09 | 0.17 | cis | 1.6E-04 |
| rs9671394  | miR-127-3p  | 7.1E-09 | 0.09 | cis | 1.6E-04 |
| rs9342836  | miR-30a-3p  | 7.7E-09 | 0.17 | cis | 1.6E-04 |
| rs13242526 | miR-339-5p  | 7.6E-09 | 0.09 | cis | 1.7E-04 |
| rs7149242  | miR-127-3p  | 9.7E-09 | 0.08 | cis | 2.0E-04 |
| rs4073275  | miR-133a    | 2.1E-08 | 0.08 | cis | 4.3E-04 |
| rs10951499 | miR-339-5p  | 2.4E-08 | 0.08 | cis | 4.8E-04 |
| rs11218648 | miR-125b-5p | 2.9E-08 | 0.08 | cis | 5.5E-04 |
| rs7937803  | miR-125b-5p | 2.9E-08 | 0.08 | cis | 5.5E-04 |
| rs4935796  | miR-125b-5p | 3.0E-08 | 0.08 | cis | 5.6E-04 |
| rs7938375  | miR-125b-5p | 2.8E-08 | 0.08 | cis | 5.6E-04 |
| rs1839544  | miR-125b-5p | 2.8E-08 | 0.08 | cis | 5.6E-04 |
| rs7141210  | miR-654-5p  | 3.6E-08 | 0.09 | cis | 6.4E-04 |
| rs6589936  | miR-100-5p  | 3.5E-08 | 0.08 | cis | 6.4E-04 |
| rs12882815 | miR-654-5p  | 3.6E-08 | 0.09 | cis | 6.5E-04 |
| rs4619692  | miR-133a    | 3.7E-08 | 0.08 | cis | 6.5E-04 |
| rs4072474  | miR-133a    | 5.2E-08 | 0.08 | cis | 9.0E-04 |
| rs11698727 | miR-133a    | 5.4E-08 | 0.08 | cis | 9.3E-04 |
| rs1880296  | miR-339-5p  | 6.5E-08 | 0.08 | cis | 1.1E-03 |
| rs4905994  | miR-127-3p  | 6.6E-08 | 0.08 | cis | 1.1E-03 |
| rs1880295  | miR-339-5p  | 6.5E-08 | 0.08 | cis | 1.1E-03 |
| rs11620937 | miR-127-3p  | 7.2E-08 | 0.07 | cis | 1.2E-03 |
| rs7155375  | miR-654-5p  | 8.2E-08 | 0.08 | cis | 1.3E-03 |
| rs10262070 | miR-339-5p  | 8.5E-08 | 0.07 | cis | 1.3E-03 |
| rs7114509  | miR-125b-5p | 1.2E-07 | 0.07 | cis | 1.9E-03 |
| rs1901184  | miR-125b-5p | 1.3E-07 | 0.07 | cis | 2.0E-03 |
| rs7124646  | miR-125b-5p | 1.4E-07 | 0.07 | cis | 2.1E-03 |
| rs7110089  | miR-125b-5p | 1.4E-07 | 0.07 | cis | 2.1E-03 |

|            |             |         |      |     |         |
|------------|-------------|---------|------|-----|---------|
| rs17126624 | miR-125b-5p | 1.4E-07 | 0.07 | cis | 2.1E-03 |
| rs4935797  | miR-125b-5p | 1.4E-07 | 0.07 | cis | 2.1E-03 |
| rs1839545  | miR-125b-5p | 1.5E-07 | 0.07 | cis | 2.1E-03 |
| rs11218652 | miR-125b-5p | 1.4E-07 | 0.07 | cis | 2.1E-03 |
| rs2949173  | miR-339-5p  | 1.7E-07 | 0.07 | cis | 2.4E-03 |
| rs6589923  | miR-125b-5p | 1.8E-07 | 0.07 | cis | 2.5E-03 |
| rs6589928  | miR-125b-5p | 1.8E-07 | 0.07 | cis | 2.5E-03 |
| rs7726430  | miR-218-5p  | 1.9E-07 | 0.07 | cis | 2.6E-03 |
| rs16880826 | miR-30a-3p  | 2.6E-07 | 0.14 | cis | 3.5E-03 |
| rs6973680  | miR-339-5p  | 2.7E-07 | 0.07 | cis | 3.6E-03 |
| rs6143056  | miR-133a    | 2.8E-07 | 0.07 | cis | 3.7E-03 |
| rs9364164  | miR-30a-3p  | 2.9E-07 | 0.13 | cis | 3.7E-03 |
| rs7717597  | miR-218-5p  | 3.5E-07 | 0.07 | cis | 4.5E-03 |
| rs6967496  | miR-339-5p  | 3.7E-07 | 0.07 | cis | 4.7E-03 |
| rs8012970  | miR-654-5p  | 3.7E-07 | 0.08 | cis | 4.7E-03 |
| rs17099614 | miR-654-5p  | 3.7E-07 | 0.08 | cis | 4.7E-03 |
| rs10280960 | miR-339-5p  | 3.8E-07 | 0.07 | cis | 4.7E-03 |
| rs6462277  | miR-339-5p  | 3.9E-07 | 0.07 | cis | 4.8E-03 |
| rs10146962 | miR-654-5p  | 4.7E-07 | 0.07 | cis | 5.7E-03 |
| rs2363285  | miR-339-5p  | 4.7E-07 | 0.07 | cis | 5.7E-03 |
| rs3813451  | miR-133a    | 5.2E-07 | 0.07 | cis | 6.0E-03 |
| rs11606532 | miR-100-5p  | 5.1E-07 | 0.07 | cis | 6.0E-03 |
| rs4969526  | miR-133a    | 5.1E-07 | 0.07 | cis | 6.0E-03 |
| rs10790519 | miR-100-5p  | 5.5E-07 | 0.07 | cis | 6.1E-03 |
| rs10892873 | miR-100-5p  | 5.4E-07 | 0.07 | cis | 6.2E-03 |
| rs7117842  | miR-100-5p  | 5.4E-07 | 0.07 | cis | 6.2E-03 |
| rs7115089  | miR-100-5p  | 5.4E-07 | 0.07 | cis | 6.3E-03 |
| rs7127978  | miR-100-5p  | 5.9E-07 | 0.07 | cis | 6.5E-03 |
| rs10750215 | miR-100-5p  | 6.0E-07 | 0.07 | cis | 6.6E-03 |
| rs6143050  | miR-133a    | 6.3E-07 | 0.06 | cis | 6.9E-03 |
| rs6589936  | miR-125b-5p | 6.5E-07 | 0.06 | cis | 7.1E-03 |
| rs1562821  | miR-100-5p  | 7.7E-07 | 0.07 | cis | 8.3E-03 |
| rs10502250 | miR-100-5p  | 7.9E-07 | 0.07 | cis | 8.4E-03 |
| rs13242526 | miR-339-3p  | 8.2E-07 | 0.06 | cis | 8.6E-03 |
| rs10892861 | miR-100-5p  | 8.7E-07 | 0.07 | cis | 9.1E-03 |
| rs12882815 | miR-370     | 1.2E-06 | 0.07 | cis | 0.01    |
| rs7141210  | miR-370     | 1.2E-06 | 0.07 | cis | 0.01    |
| rs7941030  | miR-100-5p  | 1.2E-06 | 0.06 | cis | 0.01    |
| rs10280960 | miR-339-3p  | 1.3E-06 | 0.06 | cis | 0.01    |
| rs12882815 | miR-127-3p  | 1.4E-06 | 0.06 | cis | 0.01    |
| rs7141210  | miR-127-3p  | 1.4E-06 | 0.06 | cis | 0.01    |

|            |             |         |      |     |      |
|------------|-------------|---------|------|-----|------|
| rs7155375  | miR-370     | 1.5E-06 | 0.06 | cis | 0.01 |
| rs7349905  | miR-30a-3p  | 1.6E-06 | 0.12 | cis | 0.02 |
| rs17099614 | miR-127-3p  | 1.7E-06 | 0.06 | cis | 0.02 |
| rs7155375  | miR-127-3p  | 1.7E-06 | 0.06 | cis | 0.02 |
| rs8012970  | miR-127-3p  | 1.7E-06 | 0.06 | cis | 0.02 |
| rs10790517 | miR-100-5p  | 1.8E-06 | 0.06 | cis | 0.02 |
| rs6589938  | miR-100-5p  | 1.8E-06 | 0.06 | cis | 0.02 |
| rs6589939  | miR-100-5p  | 1.8E-06 | 0.06 | cis | 0.02 |
| rs7149242  | miR-370     | 1.8E-06 | 0.06 | cis | 0.02 |
| rs10750216 | miR-100-5p  | 1.8E-06 | 0.06 | cis | 0.02 |
| rs10146962 | miR-127-3p  | 1.9E-06 | 0.06 | cis | 0.02 |
| rs11218725 | miR-100-5p  | 1.9E-06 | 0.06 | cis | 0.02 |
| rs7952141  | miR-100-5p  | 1.9E-06 | 0.06 | cis | 0.02 |
| rs7123220  | miR-100-5p  | 1.9E-06 | 0.06 | cis | 0.02 |
| rs7809667  | miR-339-5p  | 2.0E-06 | 0.06 | cis | 0.02 |
| rs9671394  | miR-370     | 2.1E-06 | 0.06 | cis | 0.02 |
| rs11218700 | miR-100-5p  | 2.2E-06 | 0.06 | cis | 0.02 |
| rs7941064  | miR-100-5p  | 2.2E-06 | 0.06 | cis | 0.02 |
| rs2370756  | miR-100-5p  | 2.7E-06 | 0.06 | cis | 0.02 |
| rs6089232  | miR-133a    | 3.0E-06 | 0.06 | cis | 0.03 |
| rs2427560  | miR-941     | 3.2E-06 | 0.07 | cis | 0.03 |
| rs2427560  | miR-941     | 3.2E-06 | 0.07 | cis | 0.03 |
| rs2427560  | miR-941     | 3.2E-06 | 0.07 | cis | 0.03 |
| rs2427565  | miR-941     | 3.1E-06 | 0.07 | cis | 0.03 |
| rs2427565  | miR-941     | 3.1E-06 | 0.07 | cis | 0.03 |
| rs2427565  | miR-941     | 3.1E-06 | 0.07 | cis | 0.03 |
| rs4809247  | miR-941     | 3.5E-06 | 0.07 | cis | 0.03 |
| rs4809247  | miR-941     | 3.5E-06 | 0.07 | cis | 0.03 |
| rs4809247  | miR-941     | 3.5E-06 | 0.07 | cis | 0.03 |
| rs567490   | miR-204-5p  | 3.4E-06 | 0.13 | cis | 0.03 |
| rs10750215 | miR-125b-5p | 3.4E-06 | 0.06 | cis | 0.03 |
| rs12421957 | miR-125b-5p | 3.5E-06 | 0.06 | cis | 0.03 |
| rs6122211  | miR-941     | 3.4E-06 | 0.07 | cis | 0.03 |
| rs6122211  | miR-941     | 3.4E-06 | 0.07 | cis | 0.03 |
| rs6122211  | miR-941     | 3.4E-06 | 0.07 | cis | 0.03 |
| rs9346471  | miR-30a-3p  | 3.7E-06 | 0.11 | cis | 0.03 |
| rs11606532 | miR-125b-5p | 4.0E-06 | 0.06 | cis | 0.03 |
| rs7127978  | miR-125b-5p | 4.0E-06 | 0.06 | cis | 0.03 |
| rs10790519 | miR-125b-5p | 4.3E-06 | 0.05 | cis | 0.03 |
| rs10892873 | miR-125b-5p | 4.2E-06 | 0.05 | cis | 0.03 |
| rs7117842  | miR-125b-5p | 4.2E-06 | 0.05 | cis | 0.03 |

|            |             |         |      |     |      |
|------------|-------------|---------|------|-----|------|
| rs7115089  | miR-125b-5p | 4.2E-06 | 0.05 | cis | 0.03 |
| rs11218700 | miR-125b-5p | 4.6E-06 | 0.05 | cis | 0.03 |
| rs13036466 | miR-133a    | 4.6E-06 | 0.05 | cis | 0.03 |
| rs7941064  | miR-125b-5p | 4.6E-06 | 0.05 | cis | 0.03 |
| rs2949171  | miR-339-5p  | 4.8E-06 | 0.05 | cis | 0.03 |
| rs10892871 | miR-125b-5p | 5.3E-06 | 0.05 | cis | 0.04 |
| rs2092530  | miR-30a-3p  | 5.8E-06 | 0.11 | cis | 0.04 |
| rs4077179  | miR-133a    | 6.0E-06 | 0.05 | cis | 0.04 |
| rs7941030  | miR-125b-5p | 6.3E-06 | 0.05 | cis | 0.04 |
| rs2960852  | miR-339-5p  | 6.3E-06 | 0.05 | cis | 0.04 |
| rs2363285  | miR-339-3p  | 6.6E-06 | 0.05 | cis | 0.04 |
| rs8012970  | miR-543     | 7.2E-06 | 0.06 | cis | 0.05 |
| rs17099614 | miR-543     | 7.2E-06 | 0.06 | cis | 0.05 |
| rs12702440 | miR-339-5p  | 7.2E-06 | 0.05 | cis | 0.05 |
| rs8008285  | miR-127-3p  | 7.2E-06 | 0.05 | cis | 0.05 |
| rs1190876  | miR-654-5p  | 6.8E-06 | 0.06 | cis | 0.05 |
| rs7740167  | miR-30a-3p  | 6.9E-06 | 0.10 | cis | 0.05 |
| rs10790517 | miR-125b-5p | 7.7E-06 | 0.05 | cis | 0.05 |
| rs10750216 | miR-125b-5p | 7.6E-06 | 0.05 | cis | 0.05 |
| rs6589938  | miR-125b-5p | 7.7E-06 | 0.05 | cis | 0.05 |
| rs6589939  | miR-125b-5p | 7.6E-06 | 0.05 | cis | 0.05 |
| rs11218725 | miR-125b-5p | 7.9E-06 | 0.05 | cis | 0.05 |
| rs7123220  | miR-125b-5p | 8.0E-06 | 0.05 | cis | 0.05 |
| rs7149242  | miR-543     | 7.9E-06 | 0.06 | cis | 0.05 |
| rs7952141  | miR-125b-5p | 7.9E-06 | 0.05 | cis | 0.05 |
| rs9671394  | miR-543     | 8.1E-06 | 0.06 | cis | 0.05 |
| rs4290241  | miR-100-5p  | 8.6E-06 | 0.05 | cis | 0.05 |
| rs12291999 | miR-100-5p  | 8.5E-06 | 0.05 | cis | 0.05 |
| rs11600391 | miR-100-5p  | 8.6E-06 | 0.05 | cis | 0.05 |

**Supplementary Table IV: The Overlapping miRNA and mRNA *cis*-eSNPs**

| snpID      | miRNA_FHS  | geneSym | SNP-miRNA |      |         |         | SNP-mRNA |      |         |         |
|------------|------------|---------|-----------|------|---------|---------|----------|------|---------|---------|
|            |            |         | pVal      | R2   | BH_FDR  | cisMark | pVal     | R2   | BH_FDR  | cisMark |
| rs10280960 | miR_339_3p | ZFAND2A | 1.3E-06   | 0.06 | 1.4E-02 | cis     | 6.3E-07  | 0.06 | 6.1E-04 | cis     |
| rs13242526 | miR_339_3p | GPR146  | 8.2E-07   | 0.06 | 8.6E-03 | cis     | 1.7E-09  | 0.09 | 2.9E-06 | cis     |
| rs2363285  | miR_339_3p | ZFAND2A | 6.6E-06   | 0.05 | 4.5E-02 | cis     | 5.3E-07  | 0.06 | 5.3E-04 | cis     |
| rs10262070 | miR_339_5p | ZFAND2A | 8.5E-08   | 0.07 | 1.3E-03 | cis     | 3.7E-07  | 0.06 | 3.8E-04 | cis     |
| rs10262070 | miR_339_5p | GPR146  | 8.5E-08   | 0.07 | 1.3E-03 | cis     | 1.3E-06  | 0.06 | 1.1E-03 | cis     |
| rs10275401 | miR_339_5p | GPR146  | 3.9E-09   | 0.09 | 9.2E-05 | cis     | 8.3E-09  | 0.08 | 1.2E-05 | cis     |
| rs10275401 | miR_339_5p | ZFAND2A | 3.9E-09   | 0.09 | 9.2E-05 | cis     | 2.5E-08  | 0.07 | 3.4E-05 | cis     |
| rs10280960 | miR_339_5p | ZFAND2A | 3.8E-07   | 0.07 | 4.7E-03 | cis     | 6.3E-07  | 0.06 | 6.1E-04 | cis     |
| rs10951499 | miR_339_5p | ZFAND2A | 2.4E-08   | 0.08 | 4.8E-04 | cis     | 2.7E-05  | 0.04 | 1.5E-02 | cis     |
| rs1133122  | miR_339_5p | ZFAND2A | 5.4E-10   | 0.10 | 1.9E-05 | cis     | 1.5E-07  | 0.07 | 1.8E-04 | cis     |
| rs1133122  | miR_339_5p | GPR146  | 5.4E-10   | 0.10 | 1.9E-05 | cis     | 4.7E-09  | 0.08 | 7.5E-06 | cis     |
| rs11763020 | miR_339_5p | ZFAND2A | 1.8E-10   | 0.10 | 6.9E-06 | cis     | 9.8E-05  | 0.04 | 4.3E-02 | cis     |
| rs11763020 | miR_339_5p | GPR146  | 1.8E-10   | 0.10 | 6.9E-06 | cis     | 3.2E-12  | 0.11 | 9.2E-09 | cis     |
| rs12701834 | miR_339_5p | GPR146  | 2.3E-09   | 0.09 | 7.8E-05 | cis     | 5.9E-07  | 0.06 | 5.7E-04 | cis     |
| rs12701834 | miR_339_5p | ZFAND2A | 2.3E-09   | 0.09 | 7.8E-05 | cis     | 2.4E-06  | 0.05 | 1.9E-03 | cis     |
| rs12702440 | miR_339_5p | ZFAND2A | 7.2E-06   | 0.05 | 4.5E-02 | cis     | 8.0E-12  | 0.11 | 2.1E-08 | cis     |
| rs13242526 | miR_339_5p | GPR146  | 7.6E-09   | 0.09 | 1.7E-04 | cis     | 1.7E-09  | 0.09 | 2.9E-06 | cis     |
| rs1880295  | miR_339_5p | ZFAND2A | 6.5E-08   | 0.08 | 1.1E-03 | cis     | 1.9E-13  | 0.13 | 6.7E-10 | cis     |
| rs1880296  | miR_339_5p | ZFAND2A | 6.5E-08   | 0.08 | 1.1E-03 | cis     | 1.9E-13  | 0.13 | 6.7E-10 | cis     |
| rs1997243  | miR_339_5p | GPR146  | 2.2E-10   | 0.10 | 8.3E-06 | cis     | 3.0E-12  | 0.11 | 8.8E-09 | cis     |
| rs1997243  | miR_339_5p | ZFAND2A | 2.2E-10   | 0.10 | 8.3E-06 | cis     | 7.9E-05  | 0.04 | 3.6E-02 | cis     |
| rs2363285  | miR_339_5p | ZFAND2A | 4.7E-07   | 0.07 | 5.7E-03 | cis     | 5.3E-07  | 0.06 | 5.3E-04 | cis     |
| rs2363286  | miR_339_5p | ZFAND2A | 2.2E-10   | 0.10 | 8.1E-06 | cis     | 7.8E-05  | 0.04 | 3.6E-02 | cis     |
| rs2363286  | miR_339_5p | GPR146  | 2.2E-10   | 0.10 | 8.1E-06 | cis     | 3.0E-12  | 0.11 | 8.6E-09 | cis     |
| rs2949171  | miR_339_5p | ZFAND2A | 4.8E-06   | 0.05 | 3.4E-02 | cis     | 1.1E-12  | 0.12 | 3.5E-09 | cis     |
| rs2949173  | miR_339_5p | ZFAND2A | 1.7E-07   | 0.07 | 2.4E-03 | cis     | 2.6E-13  | 0.12 | 9.2E-10 | cis     |
| rs2960852  | miR_339_5p | ZFAND2A | 6.3E-06   | 0.05 | 4.3E-02 | cis     | 1.0E-11  | 0.11 | 2.7E-08 | cis     |
| rs4724725  | miR_339_5p | ZFAND2A | 1.6E-09   | 0.09 | 5.4E-05 | cis     | 4.5E-07  | 0.06 | 4.5E-04 | cis     |
| rs4724725  | miR_339_5p | GPR146  | 1.6E-09   | 0.09 | 5.4E-05 | cis     | 1.9E-09  | 0.09 | 3.3E-06 | cis     |
| rs6462277  | miR_339_5p | GPR146  | 3.9E-07   | 0.07 | 4.8E-03 | cis     | 2.4E-06  | 0.05 | 1.9E-03 | cis     |
| rs6951245  | miR_339_5p | ZFAND2A | 1.8E-10   | 0.10 | 7.0E-06 | cis     | 9.9E-05  | 0.04 | 4.4E-02 | cis     |
| rs6951245  | miR_339_5p | GPR146  | 1.8E-10   | 0.10 | 7.0E-06 | cis     | 3.2E-12  | 0.11 | 9.2E-09 | cis     |
| rs6967496  | miR_339_5p | ZFAND2A | 3.7E-07   | 0.07 | 4.7E-03 | cis     | 5.5E-12  | 0.11 | 1.5E-08 | cis     |
| rs6973680  | miR_339_5p | ZFAND2A | 2.7E-07   | 0.07 | 3.6E-03 | cis     | 7.9E-14  | 0.13 | 3.0E-10 | cis     |
| rs7809667  | miR_339_5p | ZFAND2A | 2.0E-06   | 0.06 | 1.8E-02 | cis     | 2.6E-12  | 0.12 | 7.5E-09 | cis     |



**Supplementary Table V: Summary of miRNA-mRNA co-expression pairs**

| <b>miRNAs</b> | <b>mRNAs</b> | <b>miRNA-mRNA pairs</b> | <b>Inverse pairs</b> | <b>Sample groups</b> |
|---------------|--------------|-------------------------|----------------------|----------------------|
| 163           | 2008         | 5539                    | 80%                  | CHD cases            |
| 209           | 2302         | 6558                    | 30%                  | Controls             |
| 217           | 4893         | 26115                   | 52%                  | Overall samples      |

**Supplementary Table VI: Differential miRNA-mRNA co-expression pairs between CHD cases and controls**

| miRNA       | Transcript ID | Gene Symbol  | Interaction estimate | interaction Std.Error | interaction zValue | interaction p | Interaction FDR | Population |
|-------------|---------------|--------------|----------------------|-----------------------|--------------------|---------------|-----------------|------------|
| miR_193b_3p | 3881010       | LOC100134868 | 0.55                 | 0.12                  | 4.53               | 5.80E-06      | 0.05            | control    |
| miR_720     | 3722872       | RUNDC3A      | -1.57                | 0.36                  | -4.35              | 1.40E-05      | 0.06            | case       |
| miR_19b_3p  | 2596948       | CRYGD        | 1.4                  | 0.35                  | 3.97               | 7.10E-05      | 0.09            | control    |
| miR_18a_3p  | 3056414       | RFC2         | -1.39                | 0.36                  | -3.9               | 9.50E-05      | 0.09            | control    |
| miR_128     | 2596948       | CRYGD        | 1.19                 | 0.31                  | 3.9                | 9.50E-05      | 0.09            | control    |
| miR_18a_3p  | 2437247       | GBA          | -0.99                | 0.26                  | -3.87              | 1.10E-04      | 0.09            | control    |
| miR_7_5p    | 2491168       | DNAH6        | 1.18                 | 0.31                  | 3.84               | 1.20E-04      | 0.09            | case       |
| miR_140_3p  | 2596948       | CRYGD        | 1.12                 | 0.29                  | 3.82               | 1.30E-04      | 0.09            | control    |
| miR_210     | 3329649       | DDB2         | -1.15                | 0.3                   | -3.81              | 1.40E-04      | 0.09            | case       |
| miR_502_3p  | 2596948       | CRYGD        | 0.94                 | 0.25                  | 3.8                | 1.50E-04      | 0.09            | control    |
| miR_720     | 3720388       | PNMT         | -1.2                 | 0.32                  | -3.79              | 1.50E-04      | 0.09            | case       |
| let_7d_3p   | 3318244       | OR51T1       | -0.52                | 0.14                  | -3.72              | 2.00E-04      | 0.09            | control    |
| miR_125b_5p | 3602569       | C15orf27     | 1.64                 | 0.44                  | 3.71               | 2.00E-04      | 0.09            | case       |
| miR_19b_3p  | 2941287       | OFCC1        | 2.25                 | 0.61                  | 3.71               | 2.10E-04      | 0.09            | control    |
| miR_212_3p  | 3535780       | PTGER2       | -0.94                | 0.25                  | -3.71              | 2.10E-04      | 0.09            | control    |
| miR_145_5p  | 3881010       | LOC100134868 | 0.35                 | 0.1                   | 3.7                | 2.20E-04      | 0.09            | control    |
| miR_128     | 2941287       | OFCC1        | 2.21                 | 0.6                   | 3.68               | 2.30E-04      | 0.09            | control    |
| miR_720     | 3905145       | TGM2         | -1.73                | 0.47                  | -3.68              | 2.40E-04      | 0.09            | case       |
| miR_148b_3p | 2955863       | GPR116       | 1.88                 | 0.52                  | 3.65               | 2.60E-04      | 0.09            | control    |
| miR_505_3p  | 4011844       | IL2RG        | -1.06                | 0.29                  | -3.63              | 2.80E-04      | 0.09            | control    |
| miR_500a_3p | 3795045       | ATP9B        | -2.58                | 0.71                  | -3.63              | 2.90E-04      | 0.09            | case       |
| miR_148b_5p | 3188697       | NEK6         | -1.44                | 0.4                   | -3.63              | 2.90E-04      | 0.09            | control    |
| miR_192_5p  | 3393622       | SCN4B        | 2.01                 | 0.56                  | 3.61               | 3.10E-04      | 0.09            | case       |
| miR_100_5p  | 3756482       | KRT27        | 0.67                 | 0.19                  | 3.6                | 3.10E-04      | 0.09            | control    |
| miR_378a_5p | 2436973       | PYGO2        | -1.51                | 0.42                  | -3.58              | 3.40E-04      | 0.09            | case       |
| miR_148b_5p | 3918635       | IFNGR2       | -1.37                | 0.38                  | -3.57              | 3.60E-04      | 0.09            | control    |
| miR_24_2_5p | 3704980       | FANCA        | -2.43                | 0.68                  | -3.57              | 3.60E-04      | 0.09            | case       |
| miR_28_5p   | 2941287       | OFCC1        | 1.84                 | 0.52                  | 3.56               | 3.60E-04      | 0.09            | control    |
| miR_146b_5p | 3514685       | NCRNA00282   | -0.84                | 0.24                  | -3.56              | 3.70E-04      | 0.09            | control    |
| miR_125b_5p | 3107234       | C8orf39      | -0.72                | 0.2                   | -3.53              | 4.10E-04      | 0.09            | control    |
| miR_152     | 3053691       | GUSB         | -1.12                | 0.32                  | -3.53              | 4.20E-04      | 0.09            | case       |
| miR_654_5p  | 2645722       | GRK7         | 1.66                 | 0.47                  | 3.51               | 4.40E-04      | 0.09            | case       |
| miR_671_3p  | 2596948       | CRYGD        | 1.21                 | 0.34                  | 3.51               | 4.40E-04      | 0.09            | control    |
| miR_193b_3p | 3840327       | ZNF808       | -0.83                | 0.24                  | -3.5               | 4.60E-04      | 0.09            | control    |

|             |         |          |       |      |       |          |      |         |
|-------------|---------|----------|-------|------|-------|----------|------|---------|
| miR_30c_5p  | 2596948 | CRYGD    | 1.56  | 0.45 | 3.5   | 4.70E-04 | 0.09 | control |
| miR_7_1_3p  | 3749767 | TMEM11   | -0.72 | 0.21 | -3.5  | 4.70E-04 | 0.09 | control |
| miR_126_5p  | 2960303 | B3GAT2   | 0.95  | 0.27 | 3.49  | 4.90E-04 | 0.09 | case    |
| miR_590_5p  | 2451567 | MYBPH    | 0.88  | 0.25 | 3.48  | 4.90E-04 | 0.09 | control |
| miR_363_3p  | 2941287 | OFCC1    | 1.52  | 0.44 | 3.48  | 4.90E-04 | 0.09 | control |
| miR_590_5p  | 3666409 | CDH1     | -0.49 | 0.14 | -3.48 | 5.00E-04 | 0.09 | control |
| miR_302c_3p | 3757154 | KRT14    | -0.73 | 0.21 | -3.48 | 5.00E-04 | 0.09 | control |
| miR_766_3p  | 3476665 | SCARB1   | -2.43 | 0.7  | -3.47 | 5.20E-04 | 0.09 | case    |
| miR_212_3p  | 3033209 | INSIG1   | -1.16 | 0.33 | -3.47 | 5.20E-04 | 0.09 | control |
| miR_296_5p  | 2898597 | GMNN     | 1.83  | 0.53 | 3.47  | 5.20E-04 | 0.09 | control |
| miR_221_3p  | 3367231 | BDNF     | 2.34  | 0.68 | 3.46  | 5.40E-04 | 0.09 | case    |
| miR_106b_5p | 2485406 | HSPC159  | -0.6  | 0.17 | -3.46 | 5.50E-04 | 0.09 | control |
| miR_210     | 3643703 | UBE2I    | -1.23 | 0.36 | -3.46 | 5.50E-04 | 0.09 | case    |
| miR_18a_3p  | 2431112 | NOTCH2   | -1.02 | 0.29 | -3.45 | 5.60E-04 | 0.09 | control |
| miR_15b_3p  | 3749767 | TMEM11   | -0.86 | 0.25 | -3.45 | 5.60E-04 | 0.09 | control |
| miR_320a    | 3387537 | MAML2    | -1.77 | 0.51 | -3.45 | 5.60E-04 | 0.09 | case    |
| miR_766_3p  | 2845078 | TRIM52   | 0.88  | 0.26 | 3.45  | 5.70E-04 | 0.09 | case    |
| miR_155_5p  | 3838886 | AP2A1    | -1.24 | 0.36 | -3.45 | 5.70E-04 | 0.09 | case    |
| miR_1260a   | 3642654 | HBM      | -0.49 | 0.14 | -3.44 | 5.70E-04 | 0.09 | control |
| miR_196b_5p | 4012407 | DMRTC1   | 0.47  | 0.14 | 3.44  | 5.80E-04 | 0.09 | case    |
| miR_1275    | 2326912 | WDTC1    | -1.14 | 0.33 | -3.44 | 5.90E-04 | 0.09 | case    |
| miR_25_3p   | 2941287 | OFCC1    | 2.18  | 0.64 | 3.42  | 6.20E-04 | 0.09 | control |
| miR_590_5p  | 3018605 | SLC26A4  | 0.83  | 0.24 | 3.41  | 6.60E-04 | 0.09 | control |
| miR_1248    | 3015178 | ZSCAN21  | -3.22 | 0.95 | -3.4  | 6.60E-04 | 0.09 | control |
| miR_144_5p  | 3720739 | CASC3    | -0.6  | 0.18 | -3.4  | 6.60E-04 | 0.09 | case    |
| miR_505_3p  | 3817420 | SHD      | 1.48  | 0.44 | 3.4   | 6.80E-04 | 0.09 | control |
| miR_720     | 3124537 | CTSB     | -1.07 | 0.31 | -3.38 | 7.10E-04 | 0.09 | case    |
| miR_221_3p  | 2715634 | ADD1     | -1.11 | 0.33 | -3.38 | 7.30E-04 | 0.09 | case    |
| miR_1227    | 2908179 | VEGFA    | -1.35 | 0.4  | -3.38 | 7.30E-04 | 0.09 | case    |
| miR_7_5p    | 4001654 | GPR64    | -1.22 | 0.36 | -3.37 | 7.50E-04 | 0.09 | control |
| miR_885_5p  | 3984945 | ARMCX3   | 1.44  | 0.43 | 3.37  | 7.60E-04 | 0.09 | case    |
| miR_20a_5p  | 3029030 | CASP2    | -1.29 | 0.38 | -3.36 | 7.90E-04 | 0.09 | case    |
| miR_194_5p  | 2615360 | TGFBR2   | -1.58 | 0.47 | -3.35 | 8.00E-04 | 0.09 | case    |
| miR_454_3p  | 2359817 | INTS3    | -0.68 | 0.2  | -3.35 | 8.00E-04 | 0.09 | case    |
| miR_148a_3p | 3395817 | OR10G7   | 0.56  | 0.17 | 3.35  | 8.10E-04 | 0.09 | control |
| miR_103a_3p | 3259367 | CC2D2B   | -1.39 | 0.42 | -3.35 | 8.10E-04 | 0.09 | control |
| miR_130a_3p | 3957224 | TBC1D10A | 1.57  | 0.47 | 3.35  | 8.20E-04 | 0.09 | control |
| miR_454_3p  | 2495446 | INPP4A   | -0.89 | 0.27 | -3.35 | 8.20E-04 | 0.09 | case    |

|              |         |           |       |      |       |          |      |         |
|--------------|---------|-----------|-------|------|-------|----------|------|---------|
| miR_1260a    | 3890109 | C20orf108 | -0.91 | 0.27 | -3.34 | 8.50E-04 | 0.09 | control |
| miR_30b_5p   | 2941287 | OFCC1     | 2.65  | 0.8  | 3.33  | 8.60E-04 | 0.09 | control |
| miR_30b_5p   | 3840327 | ZNF808    | -1.36 | 0.41 | -3.33 | 8.80E-04 | 0.09 | control |
| miR_18a_3p   | 2319802 | PGD       | -0.83 | 0.25 | -3.32 | 8.90E-04 | 0.09 | control |
| miR_1275     | 3838886 | AP2A1     | -0.93 | 0.28 | -3.32 | 8.90E-04 | 0.09 | case    |
| miR_1275     | 2361342 | SEMA4A    | -0.91 | 0.28 | -3.32 | 9.10E-04 | 0.09 | case    |
| miR_27a_5p   | 3838556 | FLT3LG    | -1.49 | 0.45 | -3.31 | 9.20E-04 | 0.09 | case    |
| miR_505_3p   | 2339786 | PGM1      | -1.65 | 0.5  | -3.31 | 9.20E-04 | 0.09 | control |
| miR_18a_3p   | 3655920 | ALDOA     | -1.12 | 0.34 | -3.31 | 9.20E-04 | 0.09 | control |
| miR_93_3p    | 3373411 | OR5R1     | -0.69 | 0.21 | -3.31 | 9.30E-04 | 0.09 | case    |
| miR_1260a    | 2450345 | KIF14     | -0.72 | 0.22 | -3.31 | 9.40E-04 | 0.09 | control |
| miR_454_3p   | 3029030 | CASP2     | -1.04 | 0.32 | -3.3  | 9.80E-04 | 0.09 | case    |
| miR_574_3p   | 4026560 | FAM58A    | -0.5  | 0.15 | -3.3  | 9.80E-04 | 0.09 | case    |
| miR_18a_3p   | 3188697 | NEK6      | -1.18 | 0.36 | -3.29 | 9.90E-04 | 0.09 | control |
| miR_26a_5p   | 2941287 | OFCC1     | 1.68  | 0.51 | 3.29  | 1.00E-03 | 0.09 | control |
| miR_1260a    | 2708922 | IGF2BP2   | -0.42 | 0.13 | -3.29 | 1.00E-03 | 0.09 | control |
| miR_30b_5p   | 2596948 | CRYGD     | 1.31  | 0.4  | 3.28  | 1.00E-03 | 0.09 | control |
| miR_18a_3p   | 3587015 | KLF13     | -1.37 | 0.42 | -3.28 | 1.00E-03 | 0.09 | control |
| miR_148a_3p  | 2622970 | DOCK3     | 1.84  | 0.56 | 3.27  | 1.10E-03 | 0.1  | control |
| miR_378a_5p  | 3358538 | CHID1     | -1.57 | 0.48 | -3.27 | 1.10E-03 | 0.1  | case    |
| let_7d_3p    | 3891342 | TUBB1     | 0.33  | 0.1  | 3.26  | 1.10E-03 | 0.1  | control |
| miR_222_3p   | 2715634 | ADD1      | -0.77 | 0.24 | -3.26 | 1.10E-03 | 0.1  | case    |
| miR_221_3p   | 3957224 | TBC1D10A  | 1.69  | 0.52 | 3.26  | 1.10E-03 | 0.1  | control |
| miR_143_3p   | 2532681 | NEU2      | 4.96  | 1.53 | 3.25  | 1.10E-03 | 0.1  | case    |
| miR_197_3p   | 3705412 | C17orf97  | -1.44 | 0.44 | -3.24 | 1.20E-03 | 0.1  | case    |
| miR_520f     | 3843848 | ZNF544    | 0.78  | 0.24 | 3.24  | 1.20E-03 | 0.1  | control |
| miR_1275     | 3757664 | RAB5C     | -0.85 | 0.26 | -3.24 | 1.20E-03 | 0.1  | case    |
| miR_197_3p   | 3712363 | MPRIP     | -0.94 | 0.29 | -3.24 | 1.20E-03 | 0.1  | case    |
| miR_103a_3p  | 3957224 | TBC1D10A  | 1.83  | 0.57 | 3.23  | 1.20E-03 | 0.1  | control |
| miR_29b_2_5p | 3188697 | NEK6      | -1.18 | 0.37 | -3.23 | 1.20E-03 | 0.1  | case    |
| miR_197_3p   | 2458513 | TMEM63A   | -1.19 | 0.37 | -3.23 | 1.20E-03 | 0.1  | case    |
| miR_151a_5p  | 3168508 | MELK      | -0.99 | 0.31 | -3.23 | 1.20E-03 | 0.1  | control |
| miR_329      | 3040699 | SP8       | 4.5   | 1.4  | 3.22  | 1.30E-03 | 0.1  | case    |
| miR_150_5p   | 3840327 | ZNF808    | -1.31 | 0.41 | -3.22 | 1.30E-03 | 0.1  | control |
| miR_1260a    | 2383859 | GUK1      | -0.45 | 0.14 | -3.22 | 1.30E-03 | 0.1  | control |
| miR_20b_5p   | 2485406 | HSPC159   | -0.47 | 0.15 | -3.22 | 1.30E-03 | 0.1  | control |
| miR_1236     | 2325274 | C1orf128  | 1.2   | 0.37 | 3.22  | 1.30E-03 | 0.1  | control |
| miR_454_3p   | 2363084 | NCSTN     | -0.74 | 0.23 | -3.22 | 1.30E-03 | 0.1  | case    |

|              |         |           |       |      |       |          |     |         |
|--------------|---------|-----------|-------|------|-------|----------|-----|---------|
| miR_1248     | 2882897 | GEMIN5    | -2.95 | 0.92 | -3.21 | 1.30E-03 | 0.1 | control |
| miR_1275     | 3398145 | PRDM10    | -1.7  | 0.53 | -3.21 | 1.30E-03 | 0.1 | case    |
| miR_93_3p    | 3848039 | C3        | -2.52 | 0.79 | -3.21 | 1.30E-03 | 0.1 | case    |
| miR_197_3p   | 3937130 | C22orf25  | -1.42 | 0.44 | -3.21 | 1.30E-03 | 0.1 | case    |
| miR_210      | 3732230 | PITPNC1   | -0.66 | 0.21 | -3.2  | 1.40E-03 | 0.1 | case    |
| miR_103a_3p  | 2485406 | HSPC159   | -0.61 | 0.19 | -3.2  | 1.40E-03 | 0.1 | control |
| miR_155_5p   | 2403111 | WASF2     | -0.77 | 0.24 | -3.2  | 1.40E-03 | 0.1 | case    |
| miR_301a_3p  | 2901913 | TUBB      | -0.73 | 0.23 | -3.2  | 1.40E-03 | 0.1 | case    |
| miR_1275     | 2954818 | MRPS18A   | -0.85 | 0.27 | -3.19 | 1.40E-03 | 0.1 | control |
| miR_151a_5p  | 3880191 | GZF1      | -1.5  | 0.47 | -3.19 | 1.40E-03 | 0.1 | control |
| miR_199a_5p  | 2948783 | C6orf15   | 5.45  | 1.71 | 3.19  | 1.40E-03 | 0.1 | control |
| miR_1236     | 2801608 | 6-Mar     | 2.6   | 0.81 | 3.19  | 1.40E-03 | 0.1 | control |
| miR_1275     | 2333907 | RNF220    | -1.07 | 0.34 | -3.19 | 1.40E-03 | 0.1 | control |
| miR_210      | 3168938 | POLR1E    | -0.58 | 0.18 | -3.19 | 1.40E-03 | 0.1 | case    |
| miR_16_5p    | 3065546 | DPY19L2P2 | 0.26  | 0.08 | 3.19  | 1.40E-03 | 0.1 | case    |
| miR_185_5p   | 3852880 | EMR2      | -0.73 | 0.23 | -3.18 | 1.50E-03 | 0.1 | case    |
| miR_378a_3p  | 2620773 | CXCR6     | -0.77 | 0.24 | -3.18 | 1.50E-03 | 0.1 | case    |
| miR_574_3p   | 2903470 | SLC39A7   | -0.85 | 0.27 | -3.18 | 1.50E-03 | 0.1 | case    |
| miR_151a_5p  | 3428268 | GAS2L3    | -0.74 | 0.23 | -3.17 | 1.50E-03 | 0.1 | control |
| miR_144_5p   | 2612175 | NR2C2     | -0.59 | 0.19 | -3.17 | 1.50E-03 | 0.1 | case    |
| miR_197_3p   | 2403111 | WASF2     | -0.96 | 0.3  | -3.17 | 1.50E-03 | 0.1 | case    |
| miR_454_3p   | 2400518 | ECE1      | -0.46 | 0.15 | -3.17 | 1.50E-03 | 0.1 | case    |
| miR_1275     | 2438657 | ARHGEF11  | -1.03 | 0.33 | -3.17 | 1.50E-03 | 0.1 | case    |
| miR_1275     | 3832978 | ZFP36     | -0.87 | 0.27 | -3.17 | 1.50E-03 | 0.1 | control |
| miR_301a_3p  | 3680479 | TXNDC11   | -1.4  | 0.44 | -3.17 | 1.50E-03 | 0.1 | case    |
| miR_210      | 3191695 | EXOSC2    | -0.65 | 0.21 | -3.16 | 1.60E-03 | 0.1 | case    |
| miR_26a_5p   | 3768280 | C17orf58  | 1.11  | 0.35 | 3.15  | 1.60E-03 | 0.1 | case    |
| miR_29b_2_5p | 3442205 | ZNF384    | -1.14 | 0.36 | -3.15 | 1.70E-03 | 0.1 | case    |
| miR_29b_2_5p | 3720739 | CASC3     | -1    | 0.32 | -3.14 | 1.70E-03 | 0.1 | case    |
| miR_1260a    | 3642687 | HBQ1      | -0.89 | 0.28 | -3.14 | 1.70E-03 | 0.1 | control |
| miR_223_5p   | 2919669 | PRDM1     | -1    | 0.32 | -3.14 | 1.70E-03 | 0.1 | case    |
| miR_422a     | 2328808 | EIF3I     | -0.62 | 0.2  | -3.14 | 1.70E-03 | 0.1 | case    |
| miR_18a_3p   | 4037652 | SH3KBP1   | 1.3   | 0.41 | 3.14  | 1.70E-03 | 0.1 | control |
| miR_505_5p   | 2993639 | CBX3      | 0.81  | 0.26 | 3.13  | 1.70E-03 | 0.1 | case    |
| miR_20b_5p   | 3105600 | CA2       | -0.49 | 0.16 | -3.13 | 1.70E-03 | 0.1 | control |
| miR_15b_3p   | 3188697 | NEK6      | -0.92 | 0.29 | -3.13 | 1.70E-03 | 0.1 | control |
| miR_18a_3p   | 2395490 | ENO1      | -0.65 | 0.21 | -3.13 | 1.80E-03 | 0.1 | control |
| miR_197_3p   | 3371544 | AMBRA1    | -2.03 | 0.65 | -3.13 | 1.80E-03 | 0.1 | case    |

|              |         |           |       |      |       |          |     |         |
|--------------|---------|-----------|-------|------|-------|----------|-----|---------|
| miR_574_3p   | 2440664 | B4GALT3   | -0.67 | 0.21 | -3.12 | 1.80E-03 | 0.1 | case    |
| miR_590_5p   | 3665116 | CBFB      | -0.63 | 0.2  | -3.12 | 1.80E-03 | 0.1 | control |
| miR_193a_5p  | 3474418 | PXN       | -1.21 | 0.39 | -3.12 | 1.80E-03 | 0.1 | case    |
| miR_106a_5p  | 2485406 | HSPC159   | -0.47 | 0.15 | -3.12 | 1.80E-03 | 0.1 | control |
| miR_93_3p    | 3281762 | ENKUR     | 0.38  | 0.12 | 3.12  | 1.80E-03 | 0.1 | case    |
| miR_340_5p   | 2434233 | OTUD7B    | 2.88  | 0.93 | 3.11  | 1.80E-03 | 0.1 | case    |
| miR_197_3p   | 3124537 | CTSB      | -1.12 | 0.36 | -3.11 | 1.90E-03 | 0.1 | case    |
| miR_454_3p   | 2326640 | ARID1A    | -0.9  | 0.29 | -3.11 | 1.90E-03 | 0.1 | case    |
| miR_106a_5p  | 3105600 | CA2       | -0.49 | 0.16 | -3.11 | 1.90E-03 | 0.1 | control |
| miR_7_1_3p   | 3907190 | SLPI      | -0.23 | 0.08 | -3.11 | 1.90E-03 | 0.1 | control |
| miR_24_3p    | 2897576 | E2F3      | -1.76 | 0.57 | -3.11 | 1.90E-03 | 0.1 | control |
| miR_744_5p   | 3456666 | NFE2      | -0.86 | 0.28 | -3.11 | 1.90E-03 | 0.1 | control |
| miR_26a_5p   | 3065546 | DPY19L2P2 | 0.33  | 0.11 | 3.11  | 1.90E-03 | 0.1 | case    |
| miR_103a_3p  | 3428268 | GAS2L3    | -0.75 | 0.24 | -3.1  | 1.90E-03 | 0.1 | control |
| miR_1275     | 3852880 | EMR2      | -0.57 | 0.18 | -3.1  | 1.90E-03 | 0.1 | case    |
| miR_18a_3p   | 3774823 | CSNK1D    | -0.9  | 0.29 | -3.1  | 1.90E-03 | 0.1 | control |
| miR_1255b_5p | 2718259 | DRD5      | 0.85  | 0.27 | 3.1   | 1.90E-03 | 0.1 | control |
| miR_532_5p   | 2750463 | C4orf39   | 1.1   | 0.36 | 3.1   | 1.90E-03 | 0.1 | case    |
| miR_197_3p   | 3816264 | DOT1L     | -1.93 | 0.62 | -3.1  | 2.00E-03 | 0.1 | case    |
| miR_340_5p   | 3334501 | PRDX5     | 1.37  | 0.44 | 3.1   | 2.00E-03 | 0.1 | case    |
| miR_16_1_3p  | 2469910 | LPIN1     | -1.29 | 0.42 | -3.09 | 2.00E-03 | 0.1 | case    |
| miR_520f     | 2327338 | XKR8      | -0.84 | 0.27 | -3.09 | 2.00E-03 | 0.1 | control |
| miR_664_3p   | 3835645 | PVR       | -1.65 | 0.53 | -3.09 | 2.00E-03 | 0.1 | case    |
| miR_7_5p     | 4027639 | F8        | 1.36  | 0.44 | 3.09  | 2.00E-03 | 0.1 | case    |
| miR_31_3p    | 3980035 | YIPF6     | 6.16  | 2    | 3.08  | 2.00E-03 | 0.1 | case    |
| miR_671_3p   | 2326448 | SH3BGRL3  | -1.15 | 0.37 | -3.08 | 2.00E-03 | 0.1 | control |
| miR_574_3p   | 3945349 | CBY1      | -0.85 | 0.28 | -3.08 | 2.10E-03 | 0.1 | case    |
| miR_210      | 2562233 | RETSAT    | -1.07 | 0.35 | -3.07 | 2.20E-03 | 0.1 | case    |
| miR_24_2_5p  | 3820758 | DNM2      | -0.99 | 0.32 | -3.07 | 2.20E-03 | 0.1 | case    |
| miR_144_5p   | 2495446 | INPP4A    | -0.57 | 0.19 | -3.07 | 2.20E-03 | 0.1 | case    |
| miR_505_3p   | 2377094 | PFKFB2    | -0.75 | 0.24 | -3.06 | 2.20E-03 | 0.1 | control |
| miR_19a_3p   | 3394092 | SLC37A4   | 1.36  | 0.45 | 3.06  | 2.20E-03 | 0.1 | case    |
| miR_148b_5p  | 2359433 | LCE1E     | -0.54 | 0.18 | -3.05 | 2.30E-03 | 0.1 | case    |
| miR_744_5p   | 2910477 | FBXO9     | -0.83 | 0.27 | -3.05 | 2.30E-03 | 0.1 | control |
| miR_140_5p   | 3164312 | ACER2     | -1.06 | 0.35 | -3.05 | 2.30E-03 | 0.1 | control |
| miR_1275     | 2403111 | WASF2     | -0.55 | 0.18 | -3.05 | 2.30E-03 | 0.1 | case    |
| miR_197_3p   | 3304215 | LDB1      | -1.26 | 0.41 | -3.05 | 2.30E-03 | 0.1 | case    |
| miR_210      | 2394841 | DNAJC11   | -0.71 | 0.23 | -3.05 | 2.30E-03 | 0.1 | case    |

|             |         |            |       |      |       |          |     |         |
|-------------|---------|------------|-------|------|-------|----------|-----|---------|
| miR_1275    | 3156193 | EIF2C2     | -0.86 | 0.28 | -3.04 | 2.40E-03 | 0.1 | case    |
| miR_197_3p  | 3855660 | SUGP1      | -1.99 | 0.65 | -3.04 | 2.40E-03 | 0.1 | case    |
| miR_451a    | 3514685 | NCRNA00282 | -0.94 | 0.31 | -3.04 | 2.40E-03 | 0.1 | control |
| miR_17_5p   | 2431112 | NOTCH2     | -0.72 | 0.24 | -3.04 | 2.40E-03 | 0.1 | case    |
| miR_20a_5p  | 2485406 | HSPC159    | -0.44 | 0.14 | -3.04 | 2.40E-03 | 0.1 | control |
| miR_30c_5p  | 3840327 | ZNF808     | -1.27 | 0.42 | -3.04 | 2.40E-03 | 0.1 | control |
| miR_197_3p  | 3818732 | ARHGEF18   | -1.45 | 0.48 | -3.04 | 2.40E-03 | 0.1 | case    |
| miR_210     | 3666409 | CDH1       | -0.74 | 0.24 | -3.04 | 2.40E-03 | 0.1 | control |
| miR_152     | 2609960 | TLL3       | -1.37 | 0.45 | -3.03 | 2.40E-03 | 0.1 | case    |
| miR_1275    | 3763656 | TRIM25     | -0.62 | 0.2  | -3.03 | 2.40E-03 | 0.1 | case    |
| miR_301a_3p | 2954025 | TRERF1     | -1.34 | 0.44 | -3.03 | 2.40E-03 | 0.1 | case    |
| miR_17_5p   | 3150060 | EXT1       | -0.88 | 0.29 | -3.03 | 2.50E-03 | 0.1 | case    |
| miR_210     | 2901913 | TUBB       | -0.7  | 0.23 | -3.02 | 2.50E-03 | 0.1 | case    |
| miR_1275    | 3413212 | SLC48A1    | -0.83 | 0.27 | -3.02 | 2.50E-03 | 0.1 | case    |
| miR_30c_5p  | 2941287 | OFCC1      | 2.54  | 0.84 | 3.02  | 2.50E-03 | 0.1 | control |
| let_7c      | 2485406 | HSPC159    | -0.41 | 0.14 | -3.02 | 2.50E-03 | 0.1 | control |
| miR_24_2_5p | 3089285 | POLR3D     | -1.06 | 0.35 | -3.02 | 2.50E-03 | 0.1 | case    |
| miR_152     | 2358520 | SETDB1     | -0.96 | 0.32 | -3.02 | 2.50E-03 | 0.1 | case    |
| miR_590_5p  | 3894228 | CSNK2A1    | -0.31 | 0.1  | -3.02 | 2.60E-03 | 0.1 | control |
| miR_18a_3p  | 3883064 | ACSS2      | -1.02 | 0.34 | -3.02 | 2.60E-03 | 0.1 | control |
| miR_24_2_5p | 3871256 | PPP6R1     | -1.21 | 0.4  | -3.01 | 2.60E-03 | 0.1 | case    |
| miR_193a_5p | 3826542 | ZNF738     | 0.88  | 0.29 | 3.01  | 2.60E-03 | 0.1 | case    |
| miR_24_2_5p | 3894194 | TBC1D20    | -1.16 | 0.39 | -3.01 | 2.60E-03 | 0.1 | case    |
| miR_181a_5p | 3192609 | GFI1B      | -1.16 | 0.38 | -3.01 | 2.70E-03 | 0.1 | control |
| miR_128     | 3840327 | ZNF808     | -0.8  | 0.26 | -3    | 2.70E-03 | 0.1 | control |
| miR_222_3p  | 2623180 | RAD54L2    | -0.62 | 0.21 | -3    | 2.70E-03 | 0.1 | case    |
| miR_1275    | 3250699 | EIF4EBP2   | -0.7  | 0.23 | -3    | 2.70E-03 | 0.1 | case    |
| miR_378a_5p | 3867980 | IRF3       | -2.01 | 0.67 | -3    | 2.70E-03 | 0.1 | case    |
| miR_1180    | 3057650 | YWHAG      | -1.19 | 0.4  | -3    | 2.70E-03 | 0.1 | case    |
| miR_24_2_5p | 3192171 | POMT1      | -1.88 | 0.63 | -3    | 2.70E-03 | 0.1 | case    |
| miR_574_3p  | 3867980 | IRF3       | -0.9  | 0.3  | -3    | 2.70E-03 | 0.1 | case    |
| miR_197_3p  | 2950561 | WDR46      | -1.31 | 0.44 | -3    | 2.70E-03 | 0.1 | case    |
| miR_26a_5p  | 2989050 | RAC1       | -0.81 | 0.27 | -2.99 | 2.80E-03 | 0.1 | control |
| let_7c      | 3957224 | TBC1D10A   | 1.31  | 0.44 | 2.99  | 2.80E-03 | 0.1 | control |
| miR_18a_3p  | 2565246 | TMEM127    | -0.95 | 0.32 | -2.99 | 2.80E-03 | 0.1 | control |
| miR_744_5p  | 2553576 | RTN4       | -2.04 | 0.68 | -2.99 | 2.80E-03 | 0.1 | control |
| miR_212_3p  | 3683018 | RPS15A     | -0.4  | 0.13 | -2.99 | 2.80E-03 | 0.1 | control |
| miR_1275    | 3905145 | TGM2       | -0.84 | 0.28 | -2.99 | 2.80E-03 | 0.1 | case    |

|             |         |          |       |      |       |          |      |         |
|-------------|---------|----------|-------|------|-------|----------|------|---------|
| miR_1275    | 7385696 | SHFM1    | 0.63  | 0.21 | 2.98  | 2.80E-03 | 0.1  | case    |
| miR_20a_5p  | 3367231 | BDNF     | 1.51  | 0.51 | 2.98  | 2.90E-03 | 0.1  | case    |
| miR_26b_3p  | 3683018 | RPS15A   | -0.51 | 0.17 | -2.98 | 2.90E-03 | 0.1  | control |
| miR_454_3p  | 2609960 | TTLL3    | -0.83 | 0.28 | -2.98 | 2.90E-03 | 0.1  | case    |
| miR_197_3p  | 3656555 | RNF40    | -1.55 | 0.52 | -2.98 | 2.90E-03 | 0.1  | case    |
| miR_24_2_5p | 3656223 | ITGAL    | -0.88 | 0.3  | -2.98 | 2.90E-03 | 0.1  | case    |
| miR_454_3p  | 2431112 | NOTCH2   | -0.56 | 0.19 | -2.98 | 2.90E-03 | 0.1  | case    |
| miR_93_5p   | 2485406 | HSPC159  | -0.5  | 0.17 | -2.98 | 2.90E-03 | 0.1  | control |
| miR_342_3p  | 3937130 | C22orf25 | -1.28 | 0.43 | -2.98 | 2.90E-03 | 0.1  | case    |
| miR_17_5p   | 3074101 | C7orf49  | -0.64 | 0.21 | -2.97 | 2.90E-03 | 0.1  | case    |
| miR_210     | 3598959 | SMAD3    | -0.9  | 0.3  | -2.97 | 3.00E-03 | 0.1  | case    |
| miR_210     | 3719980 | LASP1    | -0.75 | 0.25 | -2.97 | 3.00E-03 | 0.1  | case    |
| miR_18a_3p  | 3477967 |          | -0.63 | 0.21 | -2.97 | 3.00E-03 | 0.1  | control |
| miR_1227    | 4037669 | ND5      | 0.83  | 0.28 | 2.97  | 3.00E-03 | 0.1  | case    |
| miR_629_5p  | 2737220 | C4orf17  | -1.31 | 0.44 | -2.96 | 3.00E-03 | 0.1  | control |
| miR_210     | 3545466 | AHSA1    | -0.7  | 0.23 | -2.96 | 3.00E-03 | 0.1  | case    |
| miR_144_5p  | 3477967 |          | -0.31 | 0.1  | -2.96 | 3.00E-03 | 0.1  | case    |
| miR_1227    | 3917204 | C21orf7  | 0.66  | 0.22 | 2.96  | 3.00E-03 | 0.1  | case    |
| miR_197_3p  | 3435192 | MLXIP    | -1.26 | 0.43 | -2.96 | 3.10E-03 | 0.1  | case    |
| miR_152     | 2621827 | ARIH2    | -0.99 | 0.34 | -2.96 | 3.10E-03 | 0.1  | case    |
| miR_625_3p  | 2752006 | SAP30    | -1.01 | 0.34 | -2.96 | 3.10E-03 | 0.1  | control |
| miR_200c_3p | 3418513 | 9-Mar    | -0.83 | 0.28 | -2.95 | 3.10E-03 | 0.1  | case    |
| miR_197_3p  | 3771543 | UBE2O    | -0.81 | 0.27 | -2.95 | 3.20E-03 | 0.1  | case    |
| miR_744_5p  | 2330723 | DNALI1   | 1.79  | 0.61 | 2.95  | 3.20E-03 | 0.1  | case    |
| miR_130b_5p | 3794056 | TSHZ1    | -1.06 | 0.36 | -2.95 | 3.20E-03 | 0.1  | case    |
| miR_144_5p  | 3274361 | KLF6     | -0.47 | 0.16 | -2.95 | 3.20E-03 | 0.1  | case    |
| miR_210     | 3053691 | GUSB     | -0.71 | 0.24 | -2.95 | 3.20E-03 | 0.1  | case    |
| miR_222_3p  | 2901913 | TUBB     | -0.65 | 0.22 | -2.95 | 3.20E-03 | 0.1  | case    |
| miR_144_5p  | 3352070 | CBL      | -0.44 | 0.15 | -2.95 | 3.20E-03 | 0.1  | case    |
| miR_590_5p  | 3381607 | RAB6A    | -0.46 | 0.16 | -2.94 | 3.20E-03 | 0.1  | control |
| miR_142_5p  | 3961664 | ST13     | -0.65 | 0.22 | -2.94 | 3.20E-03 | 0.1  | control |
| miR_744_5p  | 2652801 | NLGN1    | 1.52  | 0.52 | 2.94  | 3.20E-03 | 0.1  | case    |
| miR_106a_5p | 2588827 | NFE2L2   | -0.74 | 0.25 | -2.94 | 3.20E-03 | 0.1  | control |
| miR_342_3p  | 3124537 | CTSB     | -0.99 | 0.34 | -2.94 | 3.30E-03 | 0.1  | case    |
| miR_30e_3p  | 2951664 | CLPS     | 0.88  | 0.3  | 2.94  | 3.30E-03 | 0.1  | case    |
| miR_143_3p  | 3805553 | RIT2     | 6.11  | 2.08 | 2.94  | 3.30E-03 | 0.1  | control |
| miR_106a_5p | 2363084 | NCSTN    | -0.79 | 0.27 | -2.94 | 3.30E-03 | 0.11 | case    |
| miR_155_5p  | 3772719 | LGALS3BP | -1.25 | 0.43 | -2.93 | 3.30E-03 | 0.11 | case    |



|              |         |            |       |      |       |          |      |         |
|--------------|---------|------------|-------|------|-------|----------|------|---------|
| miR_181a_5p  | 3444252 | CSDA       | -0.51 | 0.17 | -2.93 | 3.30E-03 | 0.11 | control |
| miR_210      | 3318890 | ILK        | -0.71 | 0.24 | -2.93 | 3.40E-03 | 0.11 | case    |
| miR_1275     | 3124537 | CTSB       | -0.58 | 0.2  | -2.93 | 3.40E-03 | 0.11 | case    |
| miR_885_5p   | 3722872 | RUNDC3A    | -0.83 | 0.28 | -2.93 | 3.40E-03 | 0.11 | case    |
| miR_24_2_5p  | 3865715 | SYMPK      | -1.26 | 0.43 | -2.93 | 3.40E-03 | 0.11 | case    |
| miR_144_5p   | 3029030 | CASP2      | -0.68 | 0.23 | -2.93 | 3.40E-03 | 0.11 | case    |
| miR_93_5p    | 2715634 | ADD1       | -0.84 | 0.29 | -2.93 | 3.40E-03 | 0.11 | case    |
| miR_181a_5p  | 2347132 | FNBP1L     | -0.58 | 0.2  | -2.92 | 3.40E-03 | 0.11 | control |
| miR_148b_5p  | 2610732 | ATG7       | -1.05 | 0.36 | -2.92 | 3.50E-03 | 0.11 | control |
| miR_210      | 2532793 | ATG16L1    | -0.78 | 0.27 | -2.92 | 3.50E-03 | 0.11 | case    |
| miR_197_3p   | 3357279 | VPS26B     | -1.14 | 0.39 | -2.92 | 3.50E-03 | 0.11 | case    |
| miR_629_3p   | 3872604 | ZNF606     | 1.88  | 0.64 | 2.92  | 3.50E-03 | 0.11 | control |
| miR_1275     | 2671652 | ZDHHC3     | -0.57 | 0.19 | -2.92 | 3.50E-03 | 0.11 | case    |
| miR_103a_3p  | 2820925 | RHOBTB3    | -0.76 | 0.26 | -2.92 | 3.60E-03 | 0.11 | control |
| miR_24_2_5p  | 3846926 | DPP9       | -1.55 | 0.53 | -2.91 | 3.60E-03 | 0.11 | case    |
| miR_1227     | 3281762 | ENKUR      | 0.32  | 0.11 | 2.91  | 3.60E-03 | 0.11 | case    |
| miR_454_3p   | 2394841 | DNAJC11    | -0.58 | 0.2  | -2.91 | 3.60E-03 | 0.11 | case    |
| miR_766_3p   | 3474787 | NCRNA00262 | -0.79 | 0.27 | -2.91 | 3.60E-03 | 0.11 | case    |
| miR_126_3p   | 2495446 | INPP4A     | -0.87 | 0.3  | -2.91 | 3.60E-03 | 0.11 | case    |
| miR_1275     | 3334847 | C11orf2    | -0.92 | 0.31 | -2.91 | 3.60E-03 | 0.11 | control |
| miR_150_5p   | 3061651 | BET1       | 1.04  | 0.36 | 2.91  | 3.60E-03 | 0.11 | case    |
| miR_590_5p   | 2579439 | GTDC1      | -0.38 | 0.13 | -2.91 | 3.60E-03 | 0.11 | control |
| let_7d_3p    | 3626704 | SLTM       | 0.41  | 0.14 | 2.91  | 3.60E-03 | 0.11 | control |
| miR_223_3p   | 2609960 | TTLL3      | -2.73 | 0.94 | -2.91 | 3.60E-03 | 0.11 | case    |
| miR_197_3p   | 3824103 | USE1       | -1.23 | 0.42 | -2.91 | 3.60E-03 | 0.11 | case    |
| miR_29b_2_5p | 2889466 | GMCL1L     | 0.96  | 0.33 | 2.91  | 3.60E-03 | 0.11 | case    |
| miR_331_5p   | 3174121 | MAMDC2     | 25.38 | 8.74 | 2.9   | 3.70E-03 | 0.11 | case    |
| miR_181a_5p  | 2486178 | MEIS1      | -0.97 | 0.33 | -2.9  | 3.70E-03 | 0.11 | control |
| miR_766_3p   | 3358241 | SCT        | -1.2  | 0.41 | -2.9  | 3.70E-03 | 0.11 | case    |
| miR_1275     | 3702547 | COTL1      | -0.73 | 0.25 | -2.9  | 3.70E-03 | 0.11 | case    |
| miR_18a_3p   | 3945396 | GTPBP1     | -0.86 | 0.3  | -2.9  | 3.70E-03 | 0.11 | control |
| miR_15b_3p   | 2434129 | HIST2H2AB  | -0.34 | 0.12 | -2.9  | 3.80E-03 | 0.11 | control |
| miR_17_5p    | 2897576 | E2F3       | -0.85 | 0.29 | -2.9  | 3.80E-03 | 0.11 | control |
| miR_505_3p   | 3902928 | SUN5       | 1.32  | 0.46 | 2.89  | 3.80E-03 | 0.11 | control |
| miR_454_3p   | 2713555 | KIAA0226   | -0.83 | 0.29 | -2.89 | 3.80E-03 | 0.11 | case    |
| miR_17_5p    | 2363084 | NCSTN      | -0.78 | 0.27 | -2.89 | 3.80E-03 | 0.11 | case    |
| miR_93_5p    | 2400518 | ECE1       | -0.56 | 0.19 | -2.89 | 3.80E-03 | 0.11 | case    |
| miR_29c_5p   | 2949450 | HSPA1L     | 1.01  | 0.35 | 2.89  | 3.90E-03 | 0.11 | case    |

|             |         |              |       |      |       |          |      |         |
|-------------|---------|--------------|-------|------|-------|----------|------|---------|
| miR_155_5p  | 3320717 | MICAL2       | -0.54 | 0.19 | -2.89 | 3.90E-03 | 0.11 | case    |
| miR_574_3p  | 3815566 | STK11        | -0.52 | 0.18 | -2.89 | 3.90E-03 | 0.11 | case    |
| miR_330_3p  | 3742727 | DHX33        | -1.44 | 0.5  | -2.89 | 3.90E-03 | 0.11 | case    |
| miR_766_3p  | 3934785 | C21orf67     | -1.81 | 0.63 | -2.88 | 3.90E-03 | 0.11 | case    |
| miR_616_5p  | 3771744 | MXRA7        | 1.31  | 0.45 | 2.88  | 3.90E-03 | 0.11 | control |
| miR_24_2_5p | 3950726 | PPP6R2       | -1.47 | 0.51 | -2.88 | 3.90E-03 | 0.11 | case    |
| miR_106a_5p | 3444252 | CSDA         | -0.44 | 0.15 | -2.88 | 3.90E-03 | 0.11 | control |
| miR_766_3p  | 3710870 | ARHGAP44     | -1.72 | 0.6  | -2.88 | 4.00E-03 | 0.11 | case    |
| miR_197_3p  | 3329724 | MADD         | -1.06 | 0.37 | -2.88 | 4.00E-03 | 0.11 | case    |
| miR_454_3p  | 3477967 |              | -0.41 | 0.14 | -2.88 | 4.00E-03 | 0.11 | case    |
| miR_505_5p  | 7385696 | SHFM1        | 0.76  | 0.26 | 2.88  | 4.00E-03 | 0.11 | case    |
| miR_195_5p  | 3285926 | ZNF37BP      | -0.46 | 0.16 | -2.88 | 4.00E-03 | 0.11 | control |
| miR_29c_3p  | 2437577 | YY1AP1       | -0.7  | 0.24 | -2.88 | 4.00E-03 | 0.11 | control |
| miR_148b_5p | 2951730 | SLC26A8      | -0.81 | 0.28 | -2.87 | 4.00E-03 | 0.11 | control |
| let_7d_3p   | 3885464 | TOP1         | 0.42  | 0.15 | 2.87  | 4.10E-03 | 0.11 | control |
| let_7g_5p   | 3065546 | DPY19L2P2    | 0.22  | 0.08 | 2.87  | 4.10E-03 | 0.11 | case    |
| miR_660_5p  | 3880191 | GZF1         | -1.32 | 0.46 | -2.87 | 4.10E-03 | 0.11 | control |
| miR_210     | 3891163 | GNAS         | -0.94 | 0.33 | -2.87 | 4.10E-03 | 0.11 | control |
| miR_590_5p  | 3686750 | RABEP2       | 0.86  | 0.3  | 2.87  | 4.10E-03 | 0.11 | control |
| miR_376c    | 3325028 | FSHB         | -2.76 | 0.96 | -2.87 | 4.10E-03 | 0.11 | case    |
| miR_766_3p  | 3848039 | C3           | -2.32 | 0.81 | -2.87 | 4.10E-03 | 0.11 | case    |
| let_7d_3p   | 3564027 | SAV1         | 0.47  | 0.16 | 2.87  | 4.10E-03 | 0.11 | control |
| miR_1275    | 4007617 | PIM2         | -0.84 | 0.29 | -2.87 | 4.10E-03 | 0.11 | control |
| miR_221_3p  | 2793401 | MFAP3L       | -0.7  | 0.24 | -2.87 | 4.10E-03 | 0.11 | control |
| miR_222_3p  | 2353988 | FAM46C       | -0.57 | 0.2  | -2.87 | 4.10E-03 | 0.11 | control |
| miR_362_5p  | 3965314 | BRD1         | -1.04 | 0.36 | -2.87 | 4.20E-03 | 0.11 | case    |
| miR_197_3p  | 3358538 | CHID1        | -1.39 | 0.48 | -2.87 | 4.20E-03 | 0.11 | case    |
| miR_342_3p  | 2609960 | TTLL3        | -1.64 | 0.57 | -2.86 | 4.20E-03 | 0.11 | case    |
| miR_144_5p  | 3763656 | TRIM25       | -0.36 | 0.12 | -2.86 | 4.20E-03 | 0.11 | case    |
| miR_197_3p  | 3838886 | AP2A1        | -1.35 | 0.47 | -2.86 | 4.20E-03 | 0.11 | case    |
| miR_574_3p  | 2560254 | AUP1         | -0.58 | 0.2  | -2.86 | 4.20E-03 | 0.11 | case    |
| miR_148b_5p | 3629350 | SPG21        | -0.95 | 0.33 | -2.86 | 4.20E-03 | 0.11 | control |
| miR_106a_5p | 2820925 | RHOBTB3      | -0.6  | 0.21 | -2.86 | 4.20E-03 | 0.11 | control |
| miR_7_1_3p  | 2466379 | LOC100128185 | 0.41  | 0.15 | 2.86  | 4.30E-03 | 0.11 | control |
| miR_15b_3p  | 2326448 | SH3BGRL3     | -0.53 | 0.18 | -2.86 | 4.30E-03 | 0.11 | control |
| miR_152     | 2673902 | QRICH1       | -0.85 | 0.3  | -2.86 | 4.30E-03 | 0.11 | case    |
| miR_152     | 3090053 | SLC25A37     | -0.52 | 0.18 | -2.86 | 4.30E-03 | 0.11 | control |
| miR_192_5p  | 2599901 | C2orf24      | -0.63 | 0.22 | -2.85 | 4.30E-03 | 0.11 | control |

|              |         |          |       |      |       |          |      |         |
|--------------|---------|----------|-------|------|-------|----------|------|---------|
| miR_197_3p   | 3722872 | RUNDC3A  | -1.18 | 0.41 | -2.85 | 4.30E-03 | 0.11 | case    |
| miR_133a     | 2699564 | PLOD2    | 0.5   | 0.17 | 2.85  | 4.30E-03 | 0.11 | case    |
| miR_17_5p    | 2400518 | ECE1     | -0.52 | 0.18 | -2.85 | 4.40E-03 | 0.11 | case    |
| miR_24_2_5p  | 3936442 | PEX26    | -1.56 | 0.55 | -2.85 | 4.40E-03 | 0.11 | case    |
| miR_24_2_5p  | 3250278 | HK1      | -0.87 | 0.3  | -2.85 | 4.40E-03 | 0.11 | case    |
| miR_144_5p   | 3796335 | LPIN2    | -0.49 | 0.17 | -2.85 | 4.40E-03 | 0.11 | case    |
| miR_93_3p    | 3572235 | MLH3     | 0.86  | 0.3  | 2.85  | 4.40E-03 | 0.11 | case    |
| miR_17_5p    | 3868283 | VRK3     | -0.88 | 0.31 | -2.85 | 4.40E-03 | 0.11 | case    |
| let_7e_5p    | 3419807 | XPOT     | 0.46  | 0.16 | 2.85  | 4.40E-03 | 0.11 | case    |
| miR_106a_5p  | 2411228 | STIL     | -0.59 | 0.21 | -2.84 | 4.40E-03 | 0.11 | control |
| miR_24_2_5p  | 3479438 | CHFR     | -1.14 | 0.4  | -2.84 | 4.50E-03 | 0.11 | case    |
| miR_22_5p    | 2813414 | CCNB1    | -1.02 | 0.36 | -2.84 | 4.50E-03 | 0.11 | control |
| miR_155_5p   | 2881672 | TNIP1    | -0.92 | 0.32 | -2.84 | 4.50E-03 | 0.11 | case    |
| miR_1275     | 3720739 | CASC3    | -0.71 | 0.25 | -2.84 | 4.60E-03 | 0.11 | case    |
| miR_1275     | 2881672 | TNIP1    | -0.74 | 0.26 | -2.83 | 4.60E-03 | 0.11 | case    |
| miR_93_5p    | 3444252 | CSDA     | -0.45 | 0.16 | -2.83 | 4.60E-03 | 0.11 | control |
| miR_744_5p   | 3608220 | CRTC3    | -1.13 | 0.4  | -2.83 | 4.60E-03 | 0.11 | case    |
| miR_125b_5p  | 3056414 | RFC2     | -0.77 | 0.27 | -2.83 | 4.60E-03 | 0.11 | case    |
| miR_106a_5p  | 3367231 | BDNF     | 1.43  | 0.5  | 2.83  | 4.70E-03 | 0.11 | case    |
| miR_422a     | 2488732 | CCT7     | -0.64 | 0.23 | -2.83 | 4.70E-03 | 0.11 | case    |
| miR_1236     | 3086206 | FDFI1    | 1.53  | 0.54 | 2.83  | 4.70E-03 | 0.11 | control |
| miR_106b_5p  | 2820925 | RHOBTB3  | -0.62 | 0.22 | -2.83 | 4.70E-03 | 0.11 | control |
| miR_29c_3p   | 3891163 | GNAS     | -0.84 | 0.3  | -2.83 | 4.70E-03 | 0.11 | control |
| miR_331_5p   | 3824497 | MAP1S    | 10.93 | 3.87 | 2.83  | 4.70E-03 | 0.11 | case    |
| miR_197_3p   | 3771336 | EXOC7    | -1.12 | 0.4  | -2.82 | 4.70E-03 | 0.11 | case    |
| miR_193a_5p  | 2361731 | PRCC     | -1    | 0.36 | -2.82 | 4.70E-03 | 0.11 | case    |
| let_7g_5p    | 2363084 | NCSTN    | -0.76 | 0.27 | -2.82 | 4.70E-03 | 0.11 | case    |
| miR_144_5p   | 2366798 | PRRX1    | 0.63  | 0.22 | 2.82  | 4.70E-03 | 0.11 | case    |
| miR_221_3p   | 3074640 | LUZP6    | -1.14 | 0.41 | -2.82 | 4.80E-03 | 0.11 | control |
| miR_941      | 2949118 | LTB      | -1.58 | 0.56 | -2.82 | 4.80E-03 | 0.11 | control |
| miR_29b_2_5p | 3320169 | AMPD3    | -1.05 | 0.37 | -2.82 | 4.80E-03 | 0.11 | case    |
| miR_155_5p   | 3722182 | AOC2     | -0.73 | 0.26 | -2.82 | 4.80E-03 | 0.11 | case    |
| miR_500a_3p  | 3973891 | SYTL5    | 2.32  | 0.82 | 2.82  | 4.80E-03 | 0.11 | case    |
| let_7d_3p    | 3430086 | TCP11L2  | 0.33  | 0.12 | 2.82  | 4.90E-03 | 0.11 | control |
| miR_197_3p   | 3957790 | PIK3IP1  | -1.03 | 0.37 | -2.82 | 4.90E-03 | 0.11 | case    |
| miR_31_5p    | 2580699 | FLJ32955 | 0.77  | 0.27 | 2.82  | 4.90E-03 | 0.11 | control |
| miR_590_5p   | 2488680 | SMYD5    | 0.72  | 0.25 | 2.81  | 4.90E-03 | 0.11 | control |
| miR_135a_5p  | 2412690 | KTI12    | -1.85 | 0.66 | -2.81 | 4.90E-03 | 0.11 | control |

|              |         |          |       |      |       |          |      |         |
|--------------|---------|----------|-------|------|-------|----------|------|---------|
| let_7d_3p    | 3381925 | PGM2L1   | 0.37  | 0.13 | 2.81  | 4.90E-03 | 0.11 | control |
| miR_20a_5p   | 2820925 | RHOBTB3  | -0.53 | 0.19 | -2.81 | 4.90E-03 | 0.11 | control |
| miR_766_3p   | 3572235 | MLH3     | 0.92  | 0.33 | 2.81  | 4.90E-03 | 0.11 | case    |
| miR_17_5p    | 2609870 | BRPF1    | -0.94 | 0.33 | -2.81 | 4.90E-03 | 0.11 | case    |
| miR_1275     | 2360257 | IL6R     | -0.72 | 0.26 | -2.81 | 4.90E-03 | 0.11 | case    |
| miR_106a_5p  | 3428268 | GAS2L3   | -0.53 | 0.19 | -2.81 | 4.90E-03 | 0.11 | control |
| miR_195_5p   | 2727762 | SRD5A3   | 0.87  | 0.31 | 2.81  | 4.90E-03 | 0.11 | control |
| miR_29b_2_5p | 3770663 | GGA3     | -1.14 | 0.41 | -2.81 | 5.00E-03 | 0.11 | case    |
| miR_20b_5p   | 3444252 | CSDA     | -0.41 | 0.14 | -2.81 | 5.00E-03 | 0.11 | control |
| miR_1275     | 3806689 | HDHD2    | 0.53  | 0.19 | 2.81  | 5.00E-03 | 0.11 | case    |
| miR_574_3p   | 3015276 | CNPY4    | -0.61 | 0.22 | -2.8  | 5.10E-03 | 0.11 | case    |
| miR_24_2_5p  | 2528426 | DNAJB2   | -0.97 | 0.35 | -2.8  | 5.10E-03 | 0.11 | case    |
| miR_197_3p   | 3961842 | RANGAP1  | -1.9  | 0.68 | -2.8  | 5.10E-03 | 0.11 | case    |
| miR_744_5p   | 2618598 | EIF1B    | -0.75 | 0.27 | -2.8  | 5.10E-03 | 0.11 | control |
| miR_744_5p   | 2954678 | XPO5     | -1.19 | 0.43 | -2.8  | 5.10E-03 | 0.11 | case    |
| miR_210      | 3315231 | ECHS1    | -0.7  | 0.25 | -2.8  | 5.10E-03 | 0.11 | case    |
| miR_222_3p   | 2363084 | NCSTN    | -0.7  | 0.25 | -2.8  | 5.10E-03 | 0.11 | case    |
| miR_212_3p   | 3494706 | SLAIN1   | -0.49 | 0.17 | -2.8  | 5.10E-03 | 0.11 | control |
| miR_210      | 3179975 | PHF2     | -1.1  | 0.39 | -2.8  | 5.20E-03 | 0.11 | case    |
| miR_138_5p   | 3049868 | SUN3     | 0.81  | 0.29 | 2.8   | 5.20E-03 | 0.11 | control |
| miR_31_3p    | 3556386 | RAB2B    | 3.57  | 1.28 | 2.79  | 5.20E-03 | 0.11 | case    |
| miR_197_3p   | 3867538 | GYS1     | -1.69 | 0.61 | -2.79 | 5.20E-03 | 0.11 | case    |
| miR_29a_3p   | 3244488 | RASSF4   | -0.63 | 0.23 | -2.79 | 5.20E-03 | 0.11 | case    |
| miR_425_3p   | 2617579 | OXSR1    | -0.7  | 0.25 | -2.79 | 5.30E-03 | 0.11 | control |
| miR_425_3p   | 2326448 | SH3BGRL3 | -0.72 | 0.26 | -2.79 | 5.30E-03 | 0.11 | control |
| miR_26b_3p   | 2989112 | ZDHHC4   | -1.27 | 0.45 | -2.79 | 5.30E-03 | 0.11 | control |
| let_7d_3p    | 3281068 | PIP4K2A  | 0.34  | 0.12 | 2.79  | 5.30E-03 | 0.11 | control |
| miR_16_1_3p  | 3217123 | TRIM14   | -1.21 | 0.43 | -2.79 | 5.30E-03 | 0.11 | case    |
| miR_138_5p   | 2378369 | HHAT     | -1.93 | 0.69 | -2.79 | 5.30E-03 | 0.11 | control |
| miR_511      | 2865390 | EDIL3    | 1.84  | 0.66 | 2.79  | 5.30E-03 | 0.11 | control |
| miR_628_3p   | 3779950 | C18orf1  | 1.3   | 0.47 | 2.79  | 5.30E-03 | 0.11 | control |
| miR_144_5p   | 3075566 | ZC3HAV1  | -0.39 | 0.14 | -2.78 | 5.40E-03 | 0.11 | case    |
| miR_144_5p   | 3908831 | ZNFX1    | -0.29 | 0.1  | -2.78 | 5.40E-03 | 0.11 | case    |
| miR_422a     | 2954678 | XPO5     | -0.91 | 0.33 | -2.78 | 5.40E-03 | 0.11 | case    |
| miR_942      | 2906591 | APOBEC2  | 0.87  | 0.31 | 2.78  | 5.40E-03 | 0.11 | case    |
| miR_155_5p   | 3293963 | DNAJB12  | -1.37 | 0.49 | -2.78 | 5.40E-03 | 0.11 | case    |
| miR_210      | 3712922 | C17orf39 | -0.55 | 0.2  | -2.78 | 5.40E-03 | 0.11 | control |
| miR_106b_5p  | 3444252 | CSDA     | -0.43 | 0.16 | -2.78 | 5.40E-03 | 0.11 | control |

|             |         |           |       |      |       |          |      |         |
|-------------|---------|-----------|-------|------|-------|----------|------|---------|
| miR_144_5p  | 3414632 | DIP2B     | -0.39 | 0.14 | -2.78 | 5.40E-03 | 0.11 | case    |
| miR_212_3p  | 2759404 | GRPEL1    | -0.75 | 0.27 | -2.78 | 5.40E-03 | 0.11 | control |
| miR_210     | 4011844 | IL2RG     | -0.59 | 0.21 | -2.78 | 5.40E-03 | 0.11 | case    |
| let_7d_3p   | 4037652 | SH3KBP1   | 0.75  | 0.27 | 2.78  | 5.40E-03 | 0.11 | control |
| miR_20a_5p  | 3428268 | GAS2L3    | -0.48 | 0.17 | -2.78 | 5.50E-03 | 0.11 | control |
| miR_210     | 3833291 | PSMC4     | -0.67 | 0.24 | -2.78 | 5.50E-03 | 0.11 | case    |
| miR_720     | 3848039 | C3        | -1.98 | 0.71 | -2.78 | 5.50E-03 | 0.11 | case    |
| miR_197_3p  | 3759704 | MAP3K14   | -1.47 | 0.53 | -2.78 | 5.50E-03 | 0.11 | case    |
| miR_629_5p  | 2400518 | ECE1      | -0.63 | 0.23 | -2.78 | 5.50E-03 | 0.11 | case    |
| miR_183_3p  | 3683018 | RPS15A    | -0.38 | 0.14 | -2.77 | 5.50E-03 | 0.11 | control |
| miR_1275    | 3622934 | MYEF2     | 0.46  | 0.17 | 2.77  | 5.60E-03 | 0.11 | case    |
| miR_24_2_5p | 3718401 | LIG3      | -1.06 | 0.38 | -2.77 | 5.60E-03 | 0.11 | case    |
| miR_152     | 2610394 | TATDN2    | -1.02 | 0.37 | -2.77 | 5.60E-03 | 0.11 | case    |
| miR_210     | 2910477 | FBXO9     | -0.41 | 0.15 | -2.77 | 5.60E-03 | 0.11 | control |
| miR_664_3p  | 3128271 | NEFL      | 0.84  | 0.3  | 2.77  | 5.60E-03 | 0.11 | control |
| miR_454_3p  | 2693569 | ZXDC      | -1    | 0.36 | -2.77 | 5.60E-03 | 0.11 | case    |
| miR_616_3p  | 2995254 | C7orf41   | -0.68 | 0.25 | -2.77 | 5.60E-03 | 0.11 | control |
| miR_106a_5p | 2905432 | TBC1D22B  | -0.51 | 0.19 | -2.77 | 5.70E-03 | 0.11 | control |
| miR_590_5p  | 3371964 | PACSIN3   | 0.7   | 0.25 | 2.77  | 5.70E-03 | 0.11 | control |
| miR_182_5p  | 2482683 | RPL23AP32 | 0.27  | 0.1  | 2.77  | 5.70E-03 | 0.11 | case    |
| miR_106a_5p | 3088983 | XPO7      | -0.51 | 0.18 | -2.76 | 5.70E-03 | 0.11 | control |
| miR_197_3p  | 2440664 | B4GALT3   | -1.08 | 0.39 | -2.76 | 5.70E-03 | 0.11 | case    |
| let_7d_3p   | 3590388 | NUSAP1    | 0.34  | 0.12 | 2.76  | 5.70E-03 | 0.11 | control |
| miR_328     | 3884266 | NNAT      | -1.68 | 0.61 | -2.76 | 5.70E-03 | 0.11 | control |
| miR_454_3p  | 3091301 | PTK2B     | -0.55 | 0.2  | -2.76 | 5.80E-03 | 0.11 | case    |
| miR_144_5p  | 3460127 | GNS       | -0.33 | 0.12 | -2.76 | 5.80E-03 | 0.11 | case    |
| miR_766_3p  | 2499053 | LIMS1     | 0.45  | 0.16 | 2.76  | 5.80E-03 | 0.11 | case    |
| miR_25_5p   | 3381607 | RAB6A     | -0.74 | 0.27 | -2.76 | 5.80E-03 | 0.11 | control |
| miR_181a_5p | 2715634 | ADD1      | -0.84 | 0.31 | -2.76 | 5.80E-03 | 0.11 | case    |
| miR_505_5p  | 3053229 | ZNF680    | 0.62  | 0.22 | 2.76  | 5.80E-03 | 0.11 | case    |
| miR_210     | 3961023 | CBX7      | -0.64 | 0.23 | -2.76 | 5.90E-03 | 0.11 | case    |
| miR_210     | 3986514 | PRPS1     | -0.47 | 0.17 | -2.76 | 5.90E-03 | 0.11 | case    |
| miR_328     | 2358426 | ADAMTSL4  | -0.88 | 0.32 | -2.75 | 5.90E-03 | 0.11 | control |
| miR_744_5p  | 2394784 | NOL9      | -0.86 | 0.31 | -2.75 | 6.00E-03 | 0.11 | case    |
| miR_18a_3p  | 2377094 | PFKFB2    | -0.56 | 0.2  | -2.75 | 6.00E-03 | 0.11 | control |
| miR_744_5p  | 3090053 | SLC25A37  | -0.66 | 0.24 | -2.75 | 6.00E-03 | 0.11 | control |
| miR_144_5p  | 3456260 | ATF7      | -0.4  | 0.15 | -2.75 | 6.00E-03 | 0.11 | case    |
| miR_106a_5p | 3980745 | FOXO4     | -0.58 | 0.21 | -2.74 | 6.10E-03 | 0.11 | control |

|             |         |           |       |      |       |          |      |         |
|-------------|---------|-----------|-------|------|-------|----------|------|---------|
| miR_432_5p  | 3795466 | RBFA      | 10.43 | 3.8  | 2.74  | 6.10E-03 | 0.11 | case    |
| miR_210     | 2948485 | DHX16     | -0.92 | 0.34 | -2.74 | 6.10E-03 | 0.11 | case    |
| miR_590_5p  | 2969350 | DDO       | 0.52  | 0.19 | 2.74  | 6.10E-03 | 0.11 | control |
| miR_197_3p  | 2437577 | YY1AP1    | -1.19 | 0.43 | -2.74 | 6.10E-03 | 0.11 | case    |
| miR_28_3p   | 2591988 | MSTN      | 0.67  | 0.25 | 2.74  | 6.10E-03 | 0.11 | control |
| miR_139_5p  | 2326448 | SH3BGRL3  | -0.78 | 0.29 | -2.74 | 6.10E-03 | 0.11 | control |
| miR_590_5p  | 3074640 | LUZP6     | -0.45 | 0.17 | -2.74 | 6.20E-03 | 0.11 | control |
| miR_1275    | 3131741 | RAB11FIP1 | -0.64 | 0.23 | -2.74 | 6.20E-03 | 0.11 | case    |
| miR_574_3p  | 3014764 | CPSF4     | -0.71 | 0.26 | -2.74 | 6.20E-03 | 0.11 | case    |
| miR_18a_3p  | 3014714 | ARPC1B    | -1.08 | 0.39 | -2.74 | 6.20E-03 | 0.11 | control |
| miR_320a    | 3192609 | GFI1B     | -1.25 | 0.46 | -2.74 | 6.20E-03 | 0.11 | control |
| miR_103a_3p | 2411228 | STIL      | -0.68 | 0.25 | -2.74 | 6.20E-03 | 0.11 | control |
| miR_197_3p  | 3015276 | CNPY4     | -1.08 | 0.39 | -2.74 | 6.20E-03 | 0.11 | case    |
| miR_375     | 3906709 | GTSF1L    | -0.77 | 0.28 | -2.73 | 6.30E-03 | 0.11 | case    |
| miR_1275    | 3336378 | RBM14     | -0.74 | 0.27 | -2.73 | 6.30E-03 | 0.11 | control |
| let_7b_5p   | 2604953 | ASB18     | -0.93 | 0.34 | -2.73 | 6.30E-03 | 0.11 | control |
| miR_197_3p  | 2361731 | PRCC      | -1.43 | 0.52 | -2.73 | 6.40E-03 | 0.11 | case    |
| let_7b_5p   | 2793401 | MFAP3L    | -0.52 | 0.19 | -2.73 | 6.40E-03 | 0.11 | control |
| miR_542_3p  | 3761274 | HOXB1     | 1.74  | 0.64 | 2.73  | 6.40E-03 | 0.11 | case    |
| miR_301a_3p | 2396537 | MTOR      | -0.61 | 0.22 | -2.73 | 6.40E-03 | 0.11 | case    |
| miR_744_5p  | 2370926 | NPL       | -0.77 | 0.28 | -2.73 | 6.40E-03 | 0.11 | control |
| miR_197_3p  | 2356300 | PIAS3     | -1.7  | 0.62 | -2.73 | 6.40E-03 | 0.11 | case    |
| miR_431_5p  | 3803882 | ZSCAN30   | 1.54  | 0.56 | 2.72  | 6.40E-03 | 0.11 | case    |
| miR_342_3p  | 2434925 | PI4KB     | -1.15 | 0.42 | -2.72 | 6.40E-03 | 0.11 | case    |
| miR_148b_5p | 2989050 | RAC1      | -0.59 | 0.22 | -2.72 | 6.50E-03 | 0.11 | control |
| miR_744_5p  | 3304215 | LDB1      | -0.99 | 0.36 | -2.72 | 6.50E-03 | 0.11 | case    |
| miR_339_3p  | 3304215 | LDB1      | -0.71 | 0.26 | -2.72 | 6.50E-03 | 0.11 | case    |
| miR_362_5p  | 2437577 | YY1AP1    | -0.68 | 0.25 | -2.72 | 6.50E-03 | 0.11 | control |
| miR_197_3p  | 3822122 | NFIX      | -1.06 | 0.39 | -2.72 | 6.50E-03 | 0.11 | case    |
| miR_152     | 2674179 | USP4      | -0.71 | 0.26 | -2.72 | 6.50E-03 | 0.11 | case    |
| miR_125b_5p | 3355091 | TIRAP     | 0.96  | 0.35 | 2.72  | 6.50E-03 | 0.11 | control |
| miR_22_3p   | 3269328 | ZRANB1    | -0.5  | 0.18 | -2.72 | 6.50E-03 | 0.11 | control |
| miR_1275    | 3015519 | PILRA     | -0.46 | 0.17 | -2.72 | 6.50E-03 | 0.11 | case    |
| miR_221_3p  | 2591421 | TFPI      | -0.81 | 0.3  | -2.72 | 6.60E-03 | 0.11 | control |
| miR_197_3p  | 3605832 | ZNF592    | -1.36 | 0.5  | -2.72 | 6.60E-03 | 0.11 | case    |
| miR_1227    | 2914693 | SH3BGRL2  | 0.32  | 0.12 | 2.72  | 6.60E-03 | 0.11 | case    |
| miR_106a_5p | 2431112 | NOTCH2    | -0.63 | 0.23 | -2.71 | 6.60E-03 | 0.11 | case    |
| miR_150_5p  | 3410241 | FLJ13224  | -1.55 | 0.57 | -2.71 | 6.60E-03 | 0.11 | control |

|             |         |           |       |      |       |          |      |         |
|-------------|---------|-----------|-------|------|-------|----------|------|---------|
| miR_144_5p  | 3250863 | SGPL1     | -0.36 | 0.13 | -2.71 | 6.70E-03 | 0.11 | case    |
| miR_222_3p  | 3304215 | LDB1      | -0.58 | 0.21 | -2.71 | 6.70E-03 | 0.11 | case    |
| miR_20b_5p  | 2820925 | RHOBTB3   | -0.52 | 0.19 | -2.71 | 6.70E-03 | 0.11 | control |
| miR_199a_5p | 2331937 | ZNF642    | -3.48 | 1.28 | -2.71 | 6.80E-03 | 0.11 | case    |
| miR_106b_5p | 3095719 | GOLGA7    | -0.81 | 0.3  | -2.71 | 6.80E-03 | 0.11 | control |
| miR_193a_5p | 3934263 | LOC284837 | -0.93 | 0.34 | -2.71 | 6.80E-03 | 0.11 | case    |
| miR_1260a   | 2340433 | LEPR      | -0.54 | 0.2  | -2.71 | 6.80E-03 | 0.11 | control |
| miR_148a_3p | 2333051 | TIE1      | 1.06  | 0.39 | 2.7   | 6.80E-03 | 0.11 | control |
| miR_126_3p  | 3029030 | CASP2     | -1.02 | 0.38 | -2.7  | 6.90E-03 | 0.11 | case    |
| miR_24_2_5p | 2351063 | CSF1      | -1.2  | 0.44 | -2.7  | 6.90E-03 | 0.11 | case    |
| miR_1275    | 3096545 | SGK196    | -0.69 | 0.26 | -2.7  | 6.90E-03 | 0.11 | control |
| let_7d_3p   | 3212143 | UBQLN1    | 0.48  | 0.18 | 2.7   | 6.90E-03 | 0.11 | control |
| miR_301a_3p | 2675628 | VPRBP     | -0.61 | 0.23 | -2.7  | 6.90E-03 | 0.11 | case    |
| miR_590_5p  | 2356721 | CHD1L     | -0.36 | 0.13 | -2.7  | 6.90E-03 | 0.11 | control |
| miR_451a    | 3051907 | PHKG1     | 1.66  | 0.62 | 2.7   | 7.00E-03 | 0.11 | control |
| miR_106a_5p | 2450345 | KIF14     | -0.67 | 0.25 | -2.7  | 7.00E-03 | 0.11 | control |
| miR_155_5p  | 2361731 | PRCC      | -1.03 | 0.38 | -2.69 | 7.00E-03 | 0.11 | case    |
| miR_532_3p  | 2407439 | SF3A3     | -1.04 | 0.38 | -2.69 | 7.00E-03 | 0.11 | control |
| miR_1275    | 2676671 | TKT       | -0.59 | 0.22 | -2.69 | 7.00E-03 | 0.11 | case    |
| miR_197_3p  | 3853942 | CHERP     | -1.98 | 0.74 | -2.69 | 7.10E-03 | 0.11 | case    |
| miR_222_3p  | 3682445 | XYLT1     | -0.8  | 0.3  | -2.69 | 7.10E-03 | 0.11 | case    |
| miR_1275    | 3061651 | BET1      | 0.44  | 0.16 | 2.69  | 7.10E-03 | 0.11 | case    |
| miR_885_5p  | 3815566 | STK11     | -0.82 | 0.31 | -2.69 | 7.10E-03 | 0.12 | case    |
| miR_520f    | 3888613 | CEBPB     | -0.8  | 0.3  | -2.69 | 7.10E-03 | 0.12 | control |
| miR_671_3p  | 3749767 | TMEM11    | -1.11 | 0.41 | -2.69 | 7.10E-03 | 0.12 | control |
| miR_221_3p  | 2836738 | LARP1     | -0.7  | 0.26 | -2.69 | 7.20E-03 | 0.12 | case    |
| miR_152     | 2396537 | MTOR      | -0.84 | 0.31 | -2.69 | 7.20E-03 | 0.12 | case    |
| miR_301a_3p | 3598959 | SMAD3     | -0.73 | 0.27 | -2.69 | 7.20E-03 | 0.12 | case    |
| miR_301a_3p | 2436754 | ADAR      | -0.47 | 0.18 | -2.69 | 7.20E-03 | 0.12 | case    |
| miR_181a_5p | 2591421 | TFPI      | -0.75 | 0.28 | -2.69 | 7.20E-03 | 0.12 | control |
| miR_151a_5p | 3683018 | RPS15A    | -0.37 | 0.14 | -2.69 | 7.20E-03 | 0.12 | control |
| miR_197_3p  | 3168136 | RGP1      | -1.13 | 0.42 | -2.69 | 7.20E-03 | 0.12 | case    |
| let_7d_3p   | 3018375 | PRKAR2B   | 0.25  | 0.09 | 2.69  | 7.20E-03 | 0.12 | control |
| miR_210     | 3820663 | ILF3      | -0.62 | 0.23 | -2.68 | 7.30E-03 | 0.12 | case    |
| miR_197_3p  | 3976124 | CDK16     | -1.34 | 0.5  | -2.68 | 7.30E-03 | 0.12 | case    |
| miR_106b_5p | 2591421 | TFPI      | -0.68 | 0.25 | -2.68 | 7.40E-03 | 0.12 | control |
| miR_125a_5p | 3107234 | C8orf39   | -0.6  | 0.22 | -2.68 | 7.40E-03 | 0.12 | control |
| miR_106b_5p | 2588827 | NFE2L2    | -0.67 | 0.25 | -2.68 | 7.40E-03 | 0.12 | control |

|              |         |              |       |      |       |          |      |         |
|--------------|---------|--------------|-------|------|-------|----------|------|---------|
| miR_29b_2_5p | 3151534 | ATAD2        | -0.72 | 0.27 | -2.68 | 7.40E-03 | 0.12 | control |
| miR_196b_5p  | 2730673 | MOBK1A       | -0.52 | 0.19 | -2.68 | 7.40E-03 | 0.12 | control |
| miR_425_3p   | 3384270 | PRCP         | -0.8  | 0.3  | -2.68 | 7.50E-03 | 0.12 | control |
| miR_7_5p     | 3372253 | CELF1        | -0.55 | 0.2  | -2.67 | 7.50E-03 | 0.12 | case    |
| miR_15b_3p   | 2611848 | SLC6A6       | -0.52 | 0.19 | -2.67 | 7.50E-03 | 0.12 | control |
| miR_502_5p   | 3713794 | EPN2         | -1.77 | 0.66 | -2.67 | 7.50E-03 | 0.12 | control |
| miR_1275     | 2905664 | ZFAND3       | -0.87 | 0.32 | -2.67 | 7.50E-03 | 0.12 | case    |
| miR_93_5p    | 3936887 | MRPL40       | 0.77  | 0.29 | 2.67  | 7.50E-03 | 0.12 | control |
| miR_370      | 2682271 | PROK2        | -0.47 | 0.18 | -2.67 | 7.60E-03 | 0.12 | control |
| miR_629_5p   | 3822657 | CD97         | -0.75 | 0.28 | -2.67 | 7.60E-03 | 0.12 | case    |
| miR_148a_3p  | 2579439 | GTDC1        | -0.51 | 0.19 | -2.67 | 7.60E-03 | 0.12 | control |
| miR_505_5p   | 3221543 | CDC26        | 0.51  | 0.19 | 2.67  | 7.60E-03 | 0.12 | case    |
| miR_24_2_5p  | 3962494 | POLDIP3      | -0.84 | 0.32 | -2.67 | 7.70E-03 | 0.12 | case    |
| miR_30c_5p   | 2989050 | RAC1         | -1.07 | 0.4  | -2.67 | 7.70E-03 | 0.12 | control |
| miR_328      | 2407439 | SF3A3        | -1.17 | 0.44 | -2.67 | 7.70E-03 | 0.12 | control |
| miR_29c_5p   | 2509900 | KIF5C        | 1.25  | 0.47 | 2.67  | 7.70E-03 | 0.12 | control |
| miR_181a_5p  | 2708922 | IGF2BP2      | -0.41 | 0.15 | -2.67 | 7.70E-03 | 0.12 | control |
| miR_454_3p   | 2564816 | ANKRD36B     | -0.29 | 0.11 | -2.66 | 7.70E-03 | 0.12 | control |
| miR_339_5p   | 2407439 | SF3A3        | -1.02 | 0.38 | -2.66 | 7.70E-03 | 0.12 | control |
| miR_210      | 2347132 | FNBP1L       | -0.42 | 0.16 | -2.66 | 7.70E-03 | 0.12 | control |
| miR_532_5p   | 3732230 | PITPNC1      | -0.66 | 0.25 | -2.66 | 7.70E-03 | 0.12 | case    |
| miR_432_5p   | 3831168 | CAPNS1       | 5.29  | 1.99 | 2.66  | 7.70E-03 | 0.12 | control |
| miR_183_5p   | 3379644 | CPT1A        | 0.72  | 0.27 | 2.66  | 7.80E-03 | 0.12 | control |
| miR_103a_3p  | 2732942 | BMP2K        | -0.74 | 0.28 | -2.66 | 7.80E-03 | 0.12 | control |
| miR_103a_3p  | 3015395 | PVRIG        | 0.59  | 0.22 | 2.66  | 7.80E-03 | 0.12 | control |
| miR_17_5p    | 3029030 | CASP2        | -1.01 | 0.38 | -2.66 | 7.80E-03 | 0.12 | case    |
| miR_20b_5p   | 2363084 | NCSTN        | -0.71 | 0.27 | -2.66 | 7.80E-03 | 0.12 | case    |
| miR_20b_5p   | 2318637 | VAMP3        | -0.79 | 0.3  | -2.66 | 7.90E-03 | 0.12 | control |
| miR_132_3p   | 3818515 | TRIP10       | 1.36  | 0.51 | 2.66  | 7.90E-03 | 0.12 | control |
| miR_106a_5p  | 2910477 | FBXO9        | -0.45 | 0.17 | -2.66 | 7.90E-03 | 0.12 | control |
| miR_1275     | 3937130 | C22orf25     | -0.69 | 0.26 | -2.66 | 7.90E-03 | 0.12 | case    |
| miR_18a_3p   | 3944690 | CYTH4        | -0.65 | 0.25 | -2.66 | 7.90E-03 | 0.12 | control |
| miR_210      | 3829751 | PDCD2L       | -0.92 | 0.35 | -2.65 | 7.90E-03 | 0.12 | case    |
| miR_197_3p   | 3063685 | MCM7         | -1.21 | 0.46 | -2.65 | 8.00E-03 | 0.12 | case    |
| miR_18a_3p   | 3130823 | C8orf41      | -0.75 | 0.28 | -2.65 | 8.00E-03 | 0.12 | control |
| miR_17_5p    | 2495446 | INPP4A       | -0.8  | 0.3  | -2.65 | 8.10E-03 | 0.12 | case    |
| miR_210      | 3029030 | CASP2        | -0.95 | 0.36 | -2.65 | 8.10E-03 | 0.12 | case    |
| miR_1255b_5p | 3964299 | LOC100128818 | -0.86 | 0.32 | -2.65 | 8.10E-03 | 0.12 | case    |



|             |         |           |       |      |       |          |      |         |
|-------------|---------|-----------|-------|------|-------|----------|------|---------|
| miR_20b_5p  | 2447454 | ARPC5     | -1.42 | 0.53 | -2.65 | 8.10E-03 | 0.12 | control |
| miR_18a_3p  | 2948425 | PPP1R10   | -1.06 | 0.4  | -2.65 | 8.10E-03 | 0.12 | control |
| miR_7_5p    | 3737274 | RNF213    | -0.31 | 0.12 | -2.65 | 8.10E-03 | 0.12 | case    |
| miR_625_3p  | 3957873 | EIF4ENIF1 | 0.79  | 0.3  | 2.65  | 8.10E-03 | 0.12 | control |
| miR_1275    | 2845078 | TRIM52    | 0.45  | 0.17 | 2.65  | 8.10E-03 | 0.12 | case    |
| miR_1275    | 3815278 | ARID3A    | -1.03 | 0.39 | -2.65 | 8.10E-03 | 0.12 | case    |
| miR_152     | 2948425 | PPP1R10   | -1.03 | 0.39 | -2.65 | 8.10E-03 | 0.12 | case    |
| miR_20a_5p  | 2363084 | NCSTN     | -0.66 | 0.25 | -2.65 | 8.10E-03 | 0.12 | case    |
| miR_106a_5p | 2609870 | BRPF1     | -0.81 | 0.31 | -2.65 | 8.10E-03 | 0.12 | case    |
| miR_422a    | 3909553 | NFATC2    | -0.51 | 0.19 | -2.65 | 8.10E-03 | 0.12 | case    |
| miR_425_3p  | 3033209 | INSIG1    | -0.96 | 0.36 | -2.65 | 8.20E-03 | 0.12 | control |
| miR_1270    | 4017281 | NUP62CL   | 0.84  | 0.32 | 2.65  | 8.20E-03 | 0.12 | case    |
| miR_454_3p  | 2948425 | PPP1R10   | -0.71 | 0.27 | -2.64 | 8.20E-03 | 0.12 | case    |
| let_7d_3p   | 3908786 | STAU1     | 0.44  | 0.17 | 2.64  | 8.20E-03 | 0.12 | control |
| miR_210     | 2610394 | TATDN2    | -0.74 | 0.28 | -2.64 | 8.20E-03 | 0.12 | case    |
| miR_671_3p  | 2954818 | MRPS18A   | -1.09 | 0.41 | -2.64 | 8.30E-03 | 0.12 | control |
| miR_15b_3p  | 2319802 | PGD       | -0.5  | 0.19 | -2.64 | 8.30E-03 | 0.12 | control |
| miR_24_2_5p | 3154398 | ST3GAL1   | -0.73 | 0.28 | -2.64 | 8.30E-03 | 0.12 | case    |
| miR_17_5p   | 2954025 | TRERF1    | -1.31 | 0.49 | -2.64 | 8.30E-03 | 0.12 | case    |
| miR_301a_3p | 3075778 | HIPK2     | -0.63 | 0.24 | -2.64 | 8.30E-03 | 0.12 | case    |
| miR_1275    | 3474885 | CAMKK2    | -0.62 | 0.23 | -2.64 | 8.30E-03 | 0.12 | case    |
| miR_148a_3p | 2465628 | ZNF496    | 0.8   | 0.3  | 2.64  | 8.30E-03 | 0.12 | control |
| miR_103a_3p | 2730673 | MOBK1A    | -0.52 | 0.2  | -2.64 | 8.30E-03 | 0.12 | control |
| miR_505_5p  | 3362795 | RNF141    | 0.55  | 0.21 | 2.64  | 8.30E-03 | 0.12 | case    |
| miR_194_5p  | 3484497 | FRY       | -0.91 | 0.34 | -2.64 | 8.40E-03 | 0.12 | case    |
| miR_1275    | 2655476 | AP2M1     | -0.45 | 0.17 | -2.64 | 8.40E-03 | 0.12 | case    |
| miR_17_5p   | 3375340 | CPSF7     | -0.76 | 0.29 | -2.64 | 8.40E-03 | 0.12 | case    |
| miR_148a_3p | 2620256 | KIF15     | -0.44 | 0.17 | -2.64 | 8.40E-03 | 0.12 | control |
| miR_193a_5p | 3444436 | TAS2R14   | 0.35  | 0.13 | 2.64  | 8.40E-03 | 0.12 | case    |
| miR_19a_3p  | 3318115 | OR52K2    | -0.65 | 0.25 | -2.64 | 8.40E-03 | 0.12 | control |
| miR_15b_3p  | 3892452 | LSM14B    | 0.49  | 0.18 | 2.63  | 8.40E-03 | 0.12 | case    |
| miR_589_5p  | 2880051 | PPP2R2B   | -1.42 | 0.54 | -2.63 | 8.40E-03 | 0.12 | case    |
| miR_181a_5p | 2327283 | C1orf38   | -0.77 | 0.29 | -2.63 | 8.40E-03 | 0.12 | case    |
| miR_125a_5p | 2553576 | RTN4      | -1.3  | 0.49 | -2.63 | 8.40E-03 | 0.12 | control |
| miR_1275    | 2403446 | PTAFR     | -0.44 | 0.17 | -2.63 | 8.50E-03 | 0.12 | case    |
| miR_24_2_5p | 3816264 | DOT1L     | -1.26 | 0.48 | -2.63 | 8.50E-03 | 0.12 | case    |
| miR_106b_5p | 3428268 | GAS2L3    | -0.5  | 0.19 | -2.63 | 8.50E-03 | 0.12 | control |
| miR_22_5p   | 2946681 | HIST1H2BJ | -0.62 | 0.23 | -2.63 | 8.50E-03 | 0.12 | control |

|              |         |              |       |      |       |          |      |         |
|--------------|---------|--------------|-------|------|-------|----------|------|---------|
| miR_17_5p    | 2326640 | ARID1A       | -0.88 | 0.34 | -2.63 | 8.50E-03 | 0.12 | case    |
| miR_197_3p   | 3558145 | CIDEB        | -0.94 | 0.36 | -2.63 | 8.50E-03 | 0.12 | case    |
| miR_941      | 3761714 | GNGT2        | -0.84 | 0.32 | -2.63 | 8.60E-03 | 0.12 | case    |
| miR_642a_5p  | 2690850 | TMEM39A      | -1.32 | 0.5  | -2.63 | 8.60E-03 | 0.12 | control |
| miR_197_3p   | 3071700 | IMPDH1       | -1.47 | 0.56 | -2.63 | 8.60E-03 | 0.12 | control |
| miR_590_5p   | 2588827 | NFE2L2       | -0.31 | 0.12 | -2.63 | 8.70E-03 | 0.12 | control |
| miR_1255b_5p | 4017281 | NUP62CL      | 0.63  | 0.24 | 2.62  | 8.70E-03 | 0.12 | case    |
| miR_766_3p   | 3589410 | C15orf54     | 0.32  | 0.12 | 2.62  | 8.70E-03 | 0.12 | case    |
| miR_192_5p   | 2353988 | FAM46C       | -0.69 | 0.26 | -2.62 | 8.70E-03 | 0.12 | control |
| miR_24_2_5p  | 3976848 | HDAC6        | -1.57 | 0.6  | -2.62 | 8.70E-03 | 0.12 | case    |
| miR_93_5p    | 2363084 | NCSTN        | -0.78 | 0.3  | -2.62 | 8.70E-03 | 0.12 | case    |
| miR_1275     | 3874584 |              | 0.32  | 0.12 | 2.62  | 8.80E-03 | 0.12 | case    |
| miR_1275     | 3841545 | LILRA1       | -0.53 | 0.2  | -2.62 | 8.80E-03 | 0.12 | case    |
| miR_144_5p   | 3617312 | SLC12A6      | -0.51 | 0.19 | -2.62 | 8.80E-03 | 0.12 | case    |
| miR_197_3p   | 2829171 | TCF7         | -1.04 | 0.4  | -2.62 | 8.90E-03 | 0.12 | case    |
| miR_224_5p   | 2498143 | NCK2         | -1.44 | 0.55 | -2.62 | 8.90E-03 | 0.12 | case    |
| miR_197_3p   | 2475678 | LBH          | -0.92 | 0.35 | -2.61 | 8.90E-03 | 0.12 | case    |
| miR_150_5p   | 2407439 | SF3A3        | -1.32 | 0.51 | -2.61 | 8.90E-03 | 0.12 | control |
| miR_24_2_5p  | 3742460 | CAMTA2       | -0.89 | 0.34 | -2.61 | 9.00E-03 | 0.12 | case    |
| miR_193b_3p  | 3498476 | LOC100132099 | -0.59 | 0.23 | -2.61 | 9.00E-03 | 0.12 | control |
| miR_766_3p   | 3281762 | ENKUR        | 0.31  | 0.12 | 2.61  | 9.00E-03 | 0.12 | case    |
| miR_16_1_3p  | 2485688 | CEP68        | -1.49 | 0.57 | -2.61 | 9.10E-03 | 0.12 | case    |
| miR_16_1_3p  | 2717757 | C4orf23      | -1    | 0.38 | -2.61 | 9.10E-03 | 0.12 | case    |
| miR_144_5p   | 3739679 | VPS53        | -0.31 | 0.12 | -2.61 | 9.10E-03 | 0.12 | case    |
| let_7b_5p    | 3772719 | LGALS3BP     | -0.74 | 0.28 | -2.61 | 9.10E-03 | 0.12 | case    |
| miR_17_5p    | 2359817 | INTS3        | -0.61 | 0.23 | -2.61 | 9.10E-03 | 0.12 | case    |
| miR_744_5p   | 2394841 | DNAJC11      | -0.91 | 0.35 | -2.61 | 9.10E-03 | 0.12 | case    |
| miR_197_3p   | 4007815 | GPKOW        | -1.58 | 0.61 | -2.61 | 9.20E-03 | 0.12 | case    |
| miR_340_5p   | 3735089 | LOC643008    | 1.8   | 0.69 | 2.61  | 9.20E-03 | 0.12 | case    |
| miR_18a_3p   | 3375091 | SLC15A3      | -0.88 | 0.34 | -2.6  | 9.20E-03 | 0.12 | control |
| miR_26a_5p   | 2440476 | F11R         | -1    | 0.39 | -2.6  | 9.20E-03 | 0.12 | control |
| miR_181a_5p  | 3957224 | TBC1D10A     | 1.32  | 0.51 | 2.6   | 9.30E-03 | 0.12 | control |
| miR_744_5p   | 3724360 | GOSR2        | -0.82 | 0.31 | -2.6  | 9.30E-03 | 0.12 | case    |
| miR_181a_5p  | 2400518 | ECE1         | -0.55 | 0.21 | -2.6  | 9.30E-03 | 0.12 | case    |
| miR_422a     | 3853299 | AKAP8        | -0.96 | 0.37 | -2.6  | 9.30E-03 | 0.12 | case    |
| miR_193a_5p  | 2887048 | STK10        | -0.74 | 0.28 | -2.6  | 9.30E-03 | 0.12 | case    |
| miR_301a_3p  | 2878662 | DIAPH1       | -0.54 | 0.21 | -2.6  | 9.30E-03 | 0.12 | case    |
| miR_24_3p    | 2963784 | AKIRIN2      | -1.47 | 0.57 | -2.6  | 9.30E-03 | 0.12 | control |

|              |         |           |       |      |       |          |      |         |
|--------------|---------|-----------|-------|------|-------|----------|------|---------|
| miR_132_3p   | 3914786 | ABCC13    | -0.63 | 0.24 | -2.6  | 9.40E-03 | 0.12 | control |
| let_7c       | 2674138 | CCDC71    | 0.97  | 0.37 | 2.6   | 9.40E-03 | 0.12 | control |
| miR_210      | 3281068 | PIP4K2A   | -0.45 | 0.17 | -2.6  | 9.40E-03 | 0.12 | control |
| miR_197_3p   | 3608220 | CRTC3     | -1.17 | 0.45 | -2.59 | 9.50E-03 | 0.12 | case    |
| miR_26a_1_3p | 2329041 | KIAA1522  | -1.53 | 0.59 | -2.59 | 9.50E-03 | 0.12 | control |
| miR_139_3p   | 3200982 | MLLT3     | -0.61 | 0.24 | -2.59 | 9.50E-03 | 0.12 | control |
| miR_224_5p   | 2636483 | SIDT1     | -0.93 | 0.36 | -2.59 | 9.50E-03 | 0.12 | case    |
| miR_495      | 2739468 | ENPEP     | 1.45  | 0.56 | 2.59  | 9.50E-03 | 0.12 | case    |
| miR_197_3p   | 3243078 | ZNF33A    | 0.54  | 0.21 | 2.59  | 9.50E-03 | 0.12 | case    |
| miR_197_3p   | 3654859 | ATXN2L    | -1.74 | 0.67 | -2.59 | 9.50E-03 | 0.12 | case    |
| miR_1227     | 4037708 | ND6       | 0.88  | 0.34 | 2.59  | 9.50E-03 | 0.12 | case    |
| miR_210      | 3235726 | OPTN      | -0.32 | 0.13 | -2.59 | 9.60E-03 | 0.12 | control |
| miR_148a_3p  | 3464912 | POC1B     | -0.29 | 0.11 | -2.59 | 9.60E-03 | 0.12 | control |
| miR_378a_5p  | 3231186 | C9orf37   | -0.84 | 0.33 | -2.59 | 9.60E-03 | 0.12 | case    |
| miR_210      | 3730784 | TACO1     | -0.65 | 0.25 | -2.59 | 9.60E-03 | 0.12 | case    |
| miR_19a_3p   | 2353988 | FAM46C    | -0.56 | 0.22 | -2.59 | 9.60E-03 | 0.12 | control |
| miR_210      | 3868283 | VRK3      | -0.71 | 0.27 | -2.59 | 9.60E-03 | 0.12 | case    |
| miR_454_3p   | 3942179 | MTMR3     | -0.49 | 0.19 | -2.59 | 9.70E-03 | 0.12 | case    |
| let_7d_5p    | 3182984 | NIPSNAP3B | 0.61  | 0.23 | 2.59  | 9.70E-03 | 0.12 | case    |
| miR_29b_2_5p | 3756193 | TOP2A     | -0.87 | 0.34 | -2.59 | 9.70E-03 | 0.12 | control |
| miR_210      | 3458783 | CDK4      | -0.56 | 0.22 | -2.59 | 9.70E-03 | 0.12 | case    |
| miR_196b_5p  | 3026599 | TRIM24    | -0.81 | 0.31 | -2.59 | 9.70E-03 | 0.12 | control |
| miR_301a_3p  | 3113894 | ZHX2      | -0.58 | 0.23 | -2.59 | 9.70E-03 | 0.12 | case    |
| miR_197_3p   | 4011989 | CXCR3     | -1.23 | 0.48 | -2.59 | 9.70E-03 | 0.12 | case    |
| miR_339_3p   | 3090053 | SLC25A37  | -0.42 | 0.16 | -2.58 | 9.70E-03 | 0.12 | control |
| miR_17_5p    | 2693569 | ZXDC      | -1.18 | 0.45 | -2.58 | 9.70E-03 | 0.12 | case    |
| miR_500a_5p  | 2951730 | SLC26A8   | -0.84 | 0.32 | -2.58 | 9.80E-03 | 0.12 | control |
| miR_590_5p   | 2732942 | BMP2K     | -0.32 | 0.12 | -2.58 | 9.80E-03 | 0.12 | control |
| miR_106b_5p  | 2318637 | VAMP3     | -0.88 | 0.34 | -2.58 | 9.80E-03 | 0.12 | control |
| miR_432_5p   | 3381817 | UCP2      | 5.11  | 1.98 | 2.58  | 9.80E-03 | 0.12 | control |
| miR_197_3p   | 2715634 | ADD1      | -1.06 | 0.41 | -2.58 | 9.80E-03 | 0.12 | case    |
| miR_766_3p   | 2664452 | ANKRD28   | 0.59  | 0.23 | 2.58  | 9.80E-03 | 0.12 | case    |
| let_7b_5p    | 3861617 | HNRNPL    | -0.5  | 0.19 | -2.58 | 9.80E-03 | 0.12 | case    |
| miR_193b_3p  | 3727928 | NOG       | -0.47 | 0.18 | -2.58 | 9.80E-03 | 0.12 | control |
| let_7d_5p    | 2485406 | HSPC159   | -0.44 | 0.17 | -2.58 | 9.90E-03 | 0.12 | control |
| miR_301a_3p  | 2802398 | TRIO      | -0.75 | 0.29 | -2.58 | 9.90E-03 | 0.12 | case    |
| miR_106a_5p  | 2400518 | ECE1      | -0.45 | 0.18 | -2.58 | 9.90E-03 | 0.12 | case    |
| miR_144_5p   | 4001556 | PHKA2     | -0.44 | 0.17 | -2.58 | 9.90E-03 | 0.12 | case    |

|             |         |         |       |      |       |          |      |         |
|-------------|---------|---------|-------|------|-------|----------|------|---------|
| miR_330_3p  | 3036985 | RNF216  | -1.19 | 0.46 | -2.58 | 9.90E-03 | 0.12 | case    |
| miR_193a_5p | 2879028 | GNPDA1  | -1.07 | 0.42 | -2.58 | 9.90E-03 | 0.12 | case    |
| miR_106a_5p | 2447454 | ARPC5   | -1.4  | 0.54 | -2.58 | 9.90E-03 | 0.12 | control |
| miR_301a_3p | 3029030 | CASP2   | -0.87 | 0.34 | -2.58 | 1.00E-02 | 0.12 | case    |
| miR_148b_5p | 2719617 | BST1    | -0.75 | 0.29 | -2.58 | 1.00E-02 | 0.12 | control |
| miR_197_3p  | 2621583 | ZNF589  | -0.91 | 0.35 | -2.58 | 1.00E-02 | 0.12 | case    |
| miR_197_3p  | 3190463 | ODF2    | -1.11 | 0.43 | -2.58 | 1.00E-02 | 0.12 | case    |
| miR_152     | 2893562 | RREB1   | -1.27 | 0.49 | -2.58 | 1.00E-02 | 0.12 | case    |
| miR_20b_5p  | 2963784 | AKIRIN2 | -0.83 | 0.32 | -2.58 | 1.00E-02 | 0.12 | control |
| miR_17_5p   | 2587618 | OLA1    | -0.76 | 0.29 | -2.58 | 1.00E-02 | 0.12 | control |
| miR_454_5p  | 2505957 | PLEKHB2 | -0.84 | 0.32 | -2.57 | 1.00E-02 | 0.12 | control |
| miR_744_5p  | 2458082 | WDR26   | -0.9  | 0.35 | -2.57 | 1.00E-02 | 0.12 | control |
| miR_210     | 2954678 | XPO5    | -0.7  | 0.27 | -2.57 | 1.00E-02 | 0.12 | case    |
| let_7d_3p   | 3784509 | ZNF271  | 0.34  | 0.13 | 2.57  | 1.00E-02 | 0.12 | control |
| miR_766_3p  | 3812385 | CD226   | 0.44  | 0.17 | 2.57  | 1.00E-02 | 0.12 | case    |
| miR_629_3p  | 3598430 | SLC24A1 | 2.03  | 0.79 | 2.57  | 1.00E-02 | 0.12 | control |
| miR_1275    | 3727962 | DGKE    | 0.54  | 0.21 | 2.57  | 1.00E-02 | 0.12 | case    |
| miR_148b_5p | 3442854 | SLC2A3  | -0.69 | 0.27 | -2.57 | 1.00E-02 | 0.12 | control |
| miR_128     | 2435989 | S100A8  | -1.36 | 0.53 | -2.57 | 1.00E-02 | 0.12 | control |
| miR_629_5p  | 3908831 | ZNF1    | -0.64 | 0.25 | -2.57 | 1.00E-02 | 0.12 | case    |
| miR_590_5p  | 2496628 | C2orf29 | -0.5  | 0.19 | -2.57 | 1.00E-02 | 0.12 | control |
| miR_370     | 3378411 | RBM4B   | 0.55  | 0.21 | 2.57  | 1.00E-02 | 0.12 | control |
| miR_16_1_3p | 2806376 | SPEF2   | -1.27 | 0.5  | -2.57 | 1.00E-02 | 0.12 | control |
| miR_324_3p  | 2609960 | TTLL3   | -1.29 | 0.5  | -2.57 | 1.00E-02 | 0.12 | case    |
| miR_222_3p  | 3053691 | GUSB    | -0.51 | 0.2  | -2.57 | 1.00E-02 | 0.12 | case    |
| let_7c      | 2793401 | MFAP3L  | -0.52 | 0.2  | -2.57 | 1.00E-02 | 0.12 | control |
| miR_197_3p  | 3923354 | AGPAT3  | -1.29 | 0.5  | -2.57 | 1.00E-02 | 0.12 | case    |
| miR_155_5p  | 3156193 | EIF2C2  | -0.81 | 0.32 | -2.57 | 1.00E-02 | 0.12 | case    |
| miR_574_3p  | 3743440 | DVL2    | -0.82 | 0.32 | -2.56 | 1.00E-02 | 0.12 | case    |
| miR_93_5p   | 2431112 | NOTCH2  | -0.65 | 0.25 | -2.56 | 1.00E-02 | 0.12 | case    |
| miR_222_3p  | 2887048 | STK10   | -0.5  | 0.19 | -2.56 | 1.00E-02 | 0.12 | case    |
| miR_197_3p  | 3191695 | EXOSC2  | -0.81 | 0.32 | -2.56 | 1.00E-02 | 0.12 | case    |
| let_7d_3p   | 3563922 | MAP4K5  | 0.31  | 0.12 | 2.56  | 1.00E-02 | 0.12 | control |
| miR_210     | 3056414 | RFC2    | -0.6  | 0.24 | -2.56 | 1.00E-02 | 0.12 | case    |
| miR_1275    | 3677516 | MEFV    | -0.56 | 0.22 | -2.56 | 1.00E-02 | 0.12 | case    |
| miR_106b_5p | 2971801 | MAN1A1  | -0.57 | 0.22 | -2.56 | 1.00E-02 | 0.12 | control |
| miR_7_5p    | 3058944 | HGF     | -0.18 | 0.07 | -2.56 | 1.00E-02 | 0.12 | control |
| miR_155_5p  | 2715634 | ADD1    | -0.76 | 0.3  | -2.56 | 1.00E-02 | 0.12 | case    |

|             |         |          |       |      |       |          |      |         |
|-------------|---------|----------|-------|------|-------|----------|------|---------|
| miR_93_5p   | 2326640 | ARID1A   | -0.94 | 0.37 | -2.56 | 1.00E-02 | 0.12 | case    |
| miR_331_5p  | 3318443 | TRIM22   | -4.54 | 1.77 | -2.56 | 1.00E-02 | 0.12 | case    |
| miR_144_5p  | 3825713 | GATAD2A  | -0.47 | 0.18 | -2.56 | 1.00E-02 | 0.12 | case    |
| miR_221_3p  | 3192609 | GFI1B    | -0.87 | 0.34 | -2.56 | 1.10E-02 | 0.12 | control |
| miR_148b_5p | 3659858 | TMEM188  | -0.54 | 0.21 | -2.56 | 1.10E-02 | 0.12 | control |
| let_7d_3p   | 3597338 | TPM1     | 0.38  | 0.15 | 2.56  | 1.10E-02 | 0.12 | control |
| miR_210     | 3373724 | SSRP1    | -0.53 | 0.21 | -2.56 | 1.10E-02 | 0.12 | case    |
| miR_590_5p  | 3607537 | FANCI    | -0.42 | 0.16 | -2.56 | 1.10E-02 | 0.12 | control |
| miR_1275    | 3834405 | CEACAM3  | -0.65 | 0.26 | -2.56 | 1.10E-02 | 0.12 | case    |
| miR_210     | 2774365 | CCNI     | -0.58 | 0.23 | -2.56 | 1.10E-02 | 0.12 | control |
| let_7d_3p   | 3322251 | NUCB2    | 0.26  | 0.1  | 2.55  | 1.10E-02 | 0.12 | control |
| miR_330_3p  | 3030448 | ZNF398   | -1.41 | 0.55 | -2.55 | 1.10E-02 | 0.12 | case    |
| miR_20b_5p  | 2347132 | FNBP1L   | -0.41 | 0.16 | -2.55 | 1.10E-02 | 0.12 | control |
| let_7d_5p   | 3843848 | ZNF544   | 1     | 0.39 | 2.55  | 1.10E-02 | 0.12 | control |
| miR_148a_3p | 3914786 | ABCC13   | -0.38 | 0.15 | -2.55 | 1.10E-02 | 0.12 | control |
| let_7d_3p   | 3214749 | NOL8     | 0.37  | 0.14 | 2.55  | 1.10E-02 | 0.12 | control |
| miR_1275    | 2474977 | FOSL2    | -0.89 | 0.35 | -2.55 | 1.10E-02 | 0.12 | case    |
| let_7d_3p   | 4027769 | CLIC2    | 0.23  | 0.09 | 2.55  | 1.10E-02 | 0.12 | control |
| miR_144_5p  | 3336696 | KDM2A    | -0.38 | 0.15 | -2.55 | 1.10E-02 | 0.12 | case    |
| miR_24_2_5p | 3336378 | RBM14    | -0.73 | 0.29 | -2.55 | 1.10E-02 | 0.12 | case    |
| let_7e_5p   | 3840142 | ZNF480   | 0.48  | 0.19 | 2.55  | 1.10E-02 | 0.12 | case    |
| miR_20b_5p  | 2971801 | MAN1A1   | -0.5  | 0.2  | -2.55 | 1.10E-02 | 0.12 | control |
| miR_590_5p  | 2320392 | C1orf187 | 0.44  | 0.17 | 2.55  | 1.10E-02 | 0.12 | control |
| miR_193a_5p | 2326640 | ARID1A   | -1.03 | 0.4  | -2.55 | 1.10E-02 | 0.12 | case    |
| miR_1275    | 3487220 | AKAP11   | 0.48  | 0.19 | 2.55  | 1.10E-02 | 0.12 | case    |
| miR_144_5p  | 3442205 | ZNF384   | -0.43 | 0.17 | -2.54 | 1.10E-02 | 0.12 | case    |
| miR_93_5p   | 2820925 | RHOBTB3  | -0.53 | 0.21 | -2.54 | 1.10E-02 | 0.12 | control |
| miR_324_5p  | 2945518 | GPLD1    | 1.55  | 0.61 | 2.54  | 1.10E-02 | 0.12 | case    |
| miR_106b_5p | 2945645 | TDP2     | -0.53 | 0.21 | -2.54 | 1.10E-02 | 0.12 | control |
| miR_24_3p   | 2779992 | UBE2D3   | -1.72 | 0.68 | -2.54 | 1.10E-02 | 0.12 | control |
| miR_20b_5p  | 2588827 | NFE2L2   | -0.59 | 0.23 | -2.54 | 1.10E-02 | 0.12 | control |
| miR_106b_5p | 3074640 | LUZP6    | -0.92 | 0.36 | -2.54 | 1.10E-02 | 0.12 | control |
| miR_126_5p  | 3061484 | HEPACAM2 | -0.42 | 0.16 | -2.54 | 1.10E-02 | 0.12 | control |
| miR_502_5p  | 2826343 | SNX24    | 0.84  | 0.33 | 2.54  | 1.10E-02 | 0.12 | control |
| miR_197_3p  | 3686587 | CCDC101  | -1.11 | 0.44 | -2.54 | 1.10E-02 | 0.12 | case    |
| miR_222_3p  | 2374982 | RNPEP    | -0.53 | 0.21 | -2.54 | 1.10E-02 | 0.12 | case    |
| miR_24_2_5p | 3739162 | TBCD     | -1.23 | 0.48 | -2.54 | 1.10E-02 | 0.12 | case    |
| miR_210     | 3728097 | AKAP1    | -0.62 | 0.25 | -2.54 | 1.10E-02 | 0.12 | case    |

|              |         |          |       |      |       |          |      |         |
|--------------|---------|----------|-------|------|-------|----------|------|---------|
| miR_29b_2_5p | 3722152 | PSME3    | -0.75 | 0.3  | -2.54 | 1.10E-02 | 0.12 | case    |
| let_7e_5p    | 3281762 | ENKUR    | 0.27  | 0.11 | 2.54  | 1.10E-02 | 0.12 | case    |
| miR_144_5p   | 3737274 | RNF213   | -0.26 | 0.1  | -2.54 | 1.10E-02 | 0.12 | case    |
| miR_210      | 3375862 | MTA2     | -0.49 | 0.19 | -2.53 | 1.10E-02 | 0.12 | case    |
| miR_210      | 3433796 | PEBP1    | -0.55 | 0.22 | -2.53 | 1.10E-02 | 0.12 | case    |
| miR_152      | 2618598 | EIF1B    | -0.5  | 0.2  | -2.53 | 1.10E-02 | 0.12 | control |
| miR_590_5p   | 2488596 | EMX1     | 0.51  | 0.2  | 2.53  | 1.10E-02 | 0.12 | control |
| miR_1248     | 3866898 | LIG1     | -2.76 | 1.09 | -2.53 | 1.10E-02 | 0.12 | control |
| miR_590_5p   | 2400322 | HP1BP3   | -0.34 | 0.13 | -2.53 | 1.10E-02 | 0.12 | control |
| let_7d_5p    | 3936887 | MRPL40   | 0.84  | 0.33 | 2.53  | 1.10E-02 | 0.12 | control |
| miR_885_5p   | 3819076 | RETN     | -0.77 | 0.31 | -2.53 | 1.10E-02 | 0.12 | case    |
| let_7b_5p    | 3192609 | GFI1B    | -0.64 | 0.25 | -2.53 | 1.10E-02 | 0.12 | control |
| miR_190a     | 2957462 | GSTA4    | -1.48 | 0.58 | -2.53 | 1.10E-02 | 0.12 | control |
| miR_20a_5p   | 2450345 | KIF14    | -0.54 | 0.21 | -2.53 | 1.10E-02 | 0.12 | control |
| let_7d_3p    | 2592532 | SDPR     | 0.41  | 0.16 | 2.53  | 1.10E-02 | 0.12 | control |
| miR_532_5p   | 3090053 | SLC25A37 | -0.43 | 0.17 | -2.53 | 1.10E-02 | 0.12 | control |
| miR_454_3p   | 3608220 | CRTC3    | -0.52 | 0.2  | -2.53 | 1.10E-02 | 0.12 | case    |
| miR_144_5p   | 3473083 | MED13L   | -0.44 | 0.17 | -2.53 | 1.10E-02 | 0.12 | case    |
| miR_19a_3p   | 2726323 | SLAIN2   | -0.7  | 0.28 | -2.53 | 1.10E-02 | 0.12 | control |
| miR_93_5p    | 2793401 | MFAP3L   | -0.58 | 0.23 | -2.53 | 1.10E-02 | 0.12 | control |
| miR_17_5p    | 2910477 | FBXO9    | -0.42 | 0.17 | -2.53 | 1.20E-02 | 0.12 | control |
| miR_144_5p   | 3741997 | ANKFY1   | -0.38 | 0.15 | -2.53 | 1.20E-02 | 0.12 | case    |
| miR_671_3p   | 3085403 | MSRA     | -1.23 | 0.49 | -2.53 | 1.20E-02 | 0.12 | control |
| miR_193b_3p  | 3107234 | C8orf39  | -0.59 | 0.23 | -2.53 | 1.20E-02 | 0.12 | control |
| miR_181a_5p  | 2836738 | LARP1    | -0.68 | 0.27 | -2.53 | 1.20E-02 | 0.12 | case    |
| miR_301a_3p  | 2612175 | NR2C2    | -0.65 | 0.26 | -2.52 | 1.20E-02 | 0.12 | case    |
| miR_301a_3p  | 2495446 | INPP4A   | -0.65 | 0.26 | -2.52 | 1.20E-02 | 0.12 | case    |
| miR_301a_3p  | 3217123 | TRIM14   | -0.84 | 0.33 | -2.52 | 1.20E-02 | 0.12 | case    |
| miR_221_3p   | 2411228 | STIL     | -0.58 | 0.23 | -2.52 | 1.20E-02 | 0.12 | control |
| miR_210      | 3825713 | GATAD2A  | -0.71 | 0.28 | -2.52 | 1.20E-02 | 0.12 | case    |
| miR_152      | 2545750 | EIF2B4   | -0.97 | 0.38 | -2.52 | 1.20E-02 | 0.12 | case    |
| miR_15b_3p   | 3014714 | ARPC1B   | -0.71 | 0.28 | -2.52 | 1.20E-02 | 0.12 | control |
| miR_330_3p   | 2327338 | XKR8     | -1.15 | 0.46 | -2.52 | 1.20E-02 | 0.12 | control |
| let_7d_3p    | 2499053 | LIMS1    | 0.25  | 0.1  | 2.52  | 1.20E-02 | 0.12 | control |
| miR_1248     | 3756319 | CCR7     | -0.75 | 0.3  | -2.52 | 1.20E-02 | 0.12 | control |
| miR_1275     | 3226661 | ZER1     | -0.47 | 0.19 | -2.52 | 1.20E-02 | 0.12 | case    |
| miR_103a_3p  | 2726323 | SLAIN2   | -0.82 | 0.33 | -2.52 | 1.20E-02 | 0.12 | control |
| let_7b_5p    | 2403111 | WASF2    | -0.4  | 0.16 | -2.52 | 1.20E-02 | 0.12 | case    |

|             |         |          |       |      |       |          |      |         |
|-------------|---------|----------|-------|------|-------|----------|------|---------|
| miR_210     | 3717737 | PSMD11   | -0.62 | 0.24 | -2.52 | 1.20E-02 | 0.12 | case    |
| miR_20a_5p  | 2411228 | STIL     | -0.46 | 0.18 | -2.52 | 1.20E-02 | 0.12 | control |
| miR_431_5p  | 2407755 | GJA9     | 1.5   | 0.6  | 2.52  | 1.20E-02 | 0.12 | case    |
| miR_193b_3p | 2500275 | BCL2L11  | -0.98 | 0.39 | -2.52 | 1.20E-02 | 0.12 | control |
| let_7c      | 3914786 | ABCC13   | -0.49 | 0.19 | -2.51 | 1.20E-02 | 0.12 | control |
| miR_106a_5p | 2793401 | MFAP3L   | -0.51 | 0.2  | -2.51 | 1.20E-02 | 0.12 | control |
| miR_331_3p  | 2407439 | SF3A3    | -0.91 | 0.36 | -2.51 | 1.20E-02 | 0.12 | control |
| miR_197_3p  | 3190778 | LRRC8A   | -1.37 | 0.54 | -2.51 | 1.20E-02 | 0.12 | case    |
| miR_301a_3p | 3837001 | GRLF1    | -0.57 | 0.23 | -2.51 | 1.20E-02 | 0.12 | case    |
| miR_17_5p   | 2609960 | TTL3     | -0.89 | 0.36 | -2.51 | 1.20E-02 | 0.12 | case    |
| miR_210     | 4021469 | AIFM1    | -0.58 | 0.23 | -2.51 | 1.20E-02 | 0.12 | case    |
| miR_106a_5p | 3605832 | ZNF592   | -0.73 | 0.29 | -2.51 | 1.20E-02 | 0.12 | case    |
| miR_532_5p  | 2910477 | FBXO9    | -0.46 | 0.18 | -2.51 | 1.20E-02 | 0.12 | control |
| miR_197_3p  | 3864597 | C19orf61 | -1.04 | 0.41 | -2.51 | 1.20E-02 | 0.12 | case    |
| miR_17_5p   | 2375706 | ATP2B4   | -0.48 | 0.19 | -2.51 | 1.20E-02 | 0.12 | case    |
| miR_20a_5p  | 2730673 | MOBK1A   | -0.35 | 0.14 | -2.51 | 1.20E-02 | 0.12 | control |
| miR_590_5p  | 2426840 | WDR47    | -0.37 | 0.15 | -2.51 | 1.20E-02 | 0.12 | control |
| miR_148a_3p | 3092663 | WRN      | -0.38 | 0.15 | -2.51 | 1.20E-02 | 0.12 | control |
| miR_1275    | 3697563 | FTSJD1   | 0.77  | 0.31 | 2.51  | 1.20E-02 | 0.12 | case    |
| miR_941     | 2528308 | ZFAND2B  | -1.3  | 0.52 | -2.51 | 1.20E-02 | 0.12 | control |
| miR_18a_3p  | 3772661 | TIMP2    | -0.68 | 0.27 | -2.51 | 1.20E-02 | 0.12 | control |
| miR_340_5p  | 3815014 | BSG      | 0.57  | 0.23 | 2.51  | 1.20E-02 | 0.12 | case    |
| miR_210     | 3697015 | AARS     | -0.59 | 0.24 | -2.51 | 1.20E-02 | 0.12 | case    |
| miR_210     | 3771336 | EXOC7    | -0.55 | 0.22 | -2.51 | 1.20E-02 | 0.12 | case    |
| miR_301a_3p | 2544662 | DNMT3A   | -0.87 | 0.35 | -2.5  | 1.20E-02 | 0.12 | case    |
| miR_197_3p  | 3933331 | C2CD2    | -1.33 | 0.53 | -2.5  | 1.20E-02 | 0.12 | case    |
| miR_301a_3p | 2609870 | BRPF1    | -0.73 | 0.29 | -2.5  | 1.20E-02 | 0.12 | case    |
| miR_532_5p  | 2652801 | NLGN1    | 0.96  | 0.38 | 2.5   | 1.20E-02 | 0.12 | case    |
| miR_125a_5p | 3571436 | HEATR4   | -1.39 | 0.56 | -2.5  | 1.20E-02 | 0.12 | case    |
| miR_193b_3p | 3979101 | FAAH2    | -0.73 | 0.29 | -2.5  | 1.20E-02 | 0.12 | control |
| miR_143_3p  | 3519540 |          | 3.17  | 1.27 | 2.5   | 1.20E-02 | 0.12 | case    |
| miR_210     | 2353988 | FAM46C   | -0.47 | 0.19 | -2.5  | 1.20E-02 | 0.12 | control |
| miR_27a_5p  | 3712363 | MPRIP    | -0.51 | 0.2  | -2.5  | 1.20E-02 | 0.12 | case    |
| miR_628_3p  | 3830246 | LSR      | 1.16  | 0.47 | 2.5   | 1.20E-02 | 0.12 | control |
| miR_375     | 2852742 | AMACR    | -1.51 | 0.6  | -2.5  | 1.20E-02 | 0.12 | control |
| miR_210     | 3724360 | GOSR2    | -0.57 | 0.23 | -2.5  | 1.20E-02 | 0.12 | case    |
| miR_454_3p  | 2396537 | MTOR     | -0.5  | 0.2  | -2.5  | 1.30E-02 | 0.12 | case    |
| miR_20b_5p  | 2400518 | ECE1     | -0.43 | 0.17 | -2.5  | 1.30E-02 | 0.12 | case    |

|              |         |            |       |      |       |          |      |         |
|--------------|---------|------------|-------|------|-------|----------|------|---------|
| miR_454_3p   | 3741997 | ANKFY1     | -0.52 | 0.21 | -2.5  | 1.30E-02 | 0.12 | case    |
| miR_144_5p   | 3907830 | ELMO2      | -0.32 | 0.13 | -2.5  | 1.30E-02 | 0.12 | case    |
| miR_144_5p   | 3730806 | MAP3K3     | -0.38 | 0.15 | -2.5  | 1.30E-02 | 0.12 | case    |
| miR_142_3p   | 2742109 | FGF2       | 0.58  | 0.23 | 2.5   | 1.30E-02 | 0.12 | case    |
| miR_1254     | 4016485 | RAB40A     | 0.71  | 0.28 | 2.5   | 1.30E-02 | 0.12 | case    |
| miR_199a_5p  | 3362159 | NRIP3      | 3.59  | 1.44 | 2.5   | 1.30E-02 | 0.12 | case    |
| miR_222_3p   | 2356300 | PIAS3      | -0.79 | 0.32 | -2.5  | 1.30E-02 | 0.12 | case    |
| miR_210      | 3352503 | ARHGEF12   | -0.27 | 0.11 | -2.49 | 1.30E-02 | 0.12 | control |
| miR_106a_5p  | 3029030 | CASP2      | -0.93 | 0.37 | -2.49 | 1.30E-02 | 0.12 | case    |
| miR_93_5p    | 2411228 | STIL       | -0.51 | 0.2  | -2.49 | 1.30E-02 | 0.12 | control |
| miR_24_2_5p  | 3851651 | TNPO2      | -1.3  | 0.52 | -2.49 | 1.30E-02 | 0.12 | case    |
| miR_126_3p   | 2394841 | DNAJC11    | -0.59 | 0.24 | -2.49 | 1.30E-02 | 0.12 | case    |
| miR_106a_5p  | 2832081 | ZMAT2      | -0.42 | 0.17 | -2.49 | 1.30E-02 | 0.12 | control |
| miR_744_5p   | 3732230 | PITPNC1    | -0.72 | 0.29 | -2.49 | 1.30E-02 | 0.12 | case    |
| miR_532_5p   | 2618598 | EIF1B      | -0.47 | 0.19 | -2.49 | 1.30E-02 | 0.12 | control |
| miR_181a_5p  | 2793401 | MFAP3L     | -0.68 | 0.27 | -2.49 | 1.30E-02 | 0.12 | control |
| miR_1275     | 3722872 | RUNDC3A    | -0.55 | 0.22 | -2.49 | 1.30E-02 | 0.12 | case    |
| miR_17_5p    | 2948425 | PPP1R10    | -0.8  | 0.32 | -2.49 | 1.30E-02 | 0.12 | case    |
| miR_22_3p    | 3417574 | SPRYD4     | 0.45  | 0.18 | 2.49  | 1.30E-02 | 0.12 | control |
| miR_30c_5p   | 3514685 | NCRNA00282 | -1.06 | 0.43 | -2.49 | 1.30E-02 | 0.12 | control |
| miR_210      | 3037193 | EIF2AK1    | -0.31 | 0.13 | -2.49 | 1.30E-02 | 0.12 | control |
| miR_210      | 3558012 | TINF2      | -0.62 | 0.25 | -2.49 | 1.30E-02 | 0.12 | case    |
| miR_1275     | 3819968 | ZNF177     | 0.68  | 0.27 | 2.49  | 1.30E-02 | 0.12 | case    |
| miR_370      | 2945645 | TDP2       | -0.43 | 0.17 | -2.49 | 1.30E-02 | 0.12 | control |
| miR_1275     | 2437577 | YY1AP1     | -0.64 | 0.26 | -2.49 | 1.30E-02 | 0.12 | case    |
| miR_24_2_5p  | 3435192 | MLXIP      | -0.76 | 0.31 | -2.49 | 1.30E-02 | 0.12 | case    |
| miR_106a_5p  | 2730673 | MOBK1A     | -0.39 | 0.16 | -2.49 | 1.30E-02 | 0.12 | control |
| miR_132_3p   | 2353988 | FAM46C     | -0.68 | 0.27 | -2.49 | 1.30E-02 | 0.12 | control |
| miR_425_3p   | 3456666 | NFE2       | -0.49 | 0.2  | -2.48 | 1.30E-02 | 0.12 | control |
| miR_301a_3p  | 2326640 | ARID1A     | -0.71 | 0.28 | -2.48 | 1.30E-02 | 0.12 | case    |
| miR_106a_5p  | 3074640 | LUZP6      | -0.83 | 0.34 | -2.48 | 1.30E-02 | 0.12 | control |
| miR_106a_5p  | 2347132 | FNBP1L     | -0.41 | 0.17 | -2.48 | 1.30E-02 | 0.12 | control |
| miR_93_5p    | 2436754 | ADAR       | -0.52 | 0.21 | -2.48 | 1.30E-02 | 0.12 | case    |
| miR_7_5p     | 3737338 | RNF213     | -0.3  | 0.12 | -2.48 | 1.30E-02 | 0.12 | case    |
| miR_29b_2_5p | 3472468 | RBM19      | -1.02 | 0.41 | -2.48 | 1.30E-02 | 0.12 | case    |
| miR_652_3p   | 3159132 | COMMD5     | 1.75  | 0.71 | 2.48  | 1.30E-02 | 0.12 | control |
| miR_197_3p   | 2623180 | RAD54L2    | -0.92 | 0.37 | -2.48 | 1.30E-02 | 0.12 | case    |
| miR_106b_5p  | 2724472 | UBE2K      | -0.7  | 0.28 | -2.48 | 1.30E-02 | 0.12 | control |



|             |         |           |       |      |       |          |      |         |
|-------------|---------|-----------|-------|------|-------|----------|------|---------|
| miR_574_3p  | 3708366 | C17orf81  | -0.67 | 0.27 | -2.48 | 1.30E-02 | 0.12 | case    |
| miR_193a_5p | 2413685 | SSBP3     | -0.34 | 0.14 | -2.48 | 1.30E-02 | 0.12 | case    |
| miR_197_3p  | 3904527 | NDRG3     | -0.89 | 0.36 | -2.48 | 1.30E-02 | 0.12 | case    |
| miR_17_5p   | 3131741 | RAB11FIP1 | -0.6  | 0.24 | -2.48 | 1.30E-02 | 0.12 | case    |
| miR_183_5p  | 2510884 | ARL6IP6   | -0.65 | 0.26 | -2.48 | 1.30E-02 | 0.12 | control |
| miR_197_3p  | 2611848 | SLC6A6    | -0.92 | 0.37 | -2.48 | 1.30E-02 | 0.12 | control |
| miR_17_5p   | 2438657 | ARHGEF11  | -0.86 | 0.35 | -2.48 | 1.30E-02 | 0.12 | case    |
| miR_106b_3p | 3221543 | CDC26     | 0.41  | 0.16 | 2.48  | 1.30E-02 | 0.12 | case    |
| miR_197_3p  | 2836738 | LARP1     | -0.89 | 0.36 | -2.48 | 1.30E-02 | 0.12 | case    |
| miR_1275    | 3861372 | RASGRP4   | -0.65 | 0.26 | -2.48 | 1.30E-02 | 0.12 | case    |
| miR_152     | 3682445 | XYLT1     | -0.96 | 0.39 | -2.48 | 1.30E-02 | 0.12 | case    |
| miR_197_3p  | 2672774 | C3orf75   | -1.36 | 0.55 | -2.48 | 1.30E-02 | 0.12 | case    |
| miR_139_3p  | 2793401 | MFAP3L    | -0.58 | 0.23 | -2.48 | 1.30E-02 | 0.12 | control |
| let_7c      | 3936887 | MRPL40    | 0.65  | 0.26 | 2.48  | 1.30E-02 | 0.12 | control |
| miR_590_5p  | 2953852 | MED20     | -0.3  | 0.12 | -2.48 | 1.30E-02 | 0.12 | case    |
| miR_629_5p  | 3822875 | ZNF333    | -1.36 | 0.55 | -2.48 | 1.30E-02 | 0.12 | case    |
| miR_148a_3p | 2317512 | DFFB      | 0.97  | 0.39 | 2.48  | 1.30E-02 | 0.12 | control |
| miR_223_3p  | 2696764 | MSL2      | -2.05 | 0.83 | -2.47 | 1.30E-02 | 0.12 | control |
| miR_17_5p   | 2668205 | GLB1      | -0.54 | 0.22 | -2.47 | 1.30E-02 | 0.13 | case    |
| miR_301a_3p | 2435044 | POGZ      | -0.63 | 0.25 | -2.47 | 1.30E-02 | 0.13 | case    |
| miR_454_3p  | 2881860 | CCDC69    | -0.52 | 0.21 | -2.47 | 1.30E-02 | 0.13 | case    |
| miR_210     | 3894194 | TBC1D20   | -0.72 | 0.29 | -2.47 | 1.30E-02 | 0.13 | case    |
| miR_106b_5p | 2579439 | GTDC1     | -0.65 | 0.26 | -2.47 | 1.30E-02 | 0.13 | control |
| miR_15a_3p  | 2367326 | DNM3      | 0.89  | 0.36 | 2.47  | 1.30E-02 | 0.13 | control |
| miR_301a_3p | 3367231 | BDNF      | 1.14  | 0.46 | 2.47  | 1.30E-02 | 0.13 | case    |
| miR_197_3p  | 3697218 | VAC14     | -1.42 | 0.58 | -2.47 | 1.30E-02 | 0.13 | case    |
| miR_301a_3p | 3965314 | BRD1      | -0.89 | 0.36 | -2.47 | 1.40E-02 | 0.13 | case    |
| miR_31_5p   | 3927903 | N6AMT1    | 0.45  | 0.18 | 2.47  | 1.40E-02 | 0.13 | case    |
| miR_210     | 3089285 | POLR3D    | -0.66 | 0.27 | -2.47 | 1.40E-02 | 0.13 | case    |
| miR_1254    | 2842157 | HRH2      | -0.64 | 0.26 | -2.47 | 1.40E-02 | 0.13 | case    |
| miR_193a_5p | 2951730 | SLC26A8   | -0.59 | 0.24 | -2.47 | 1.40E-02 | 0.13 | control |
| miR_106a_5p | 2326640 | ARID1A    | -0.8  | 0.32 | -2.47 | 1.40E-02 | 0.13 | case    |
| miR_301a_3p | 3978453 | GNL3L     | -0.51 | 0.2  | -2.47 | 1.40E-02 | 0.13 | case    |
| miR_16_1_3p | 3154700 | ZFAT      | -1.39 | 0.56 | -2.47 | 1.40E-02 | 0.13 | case    |
| miR_197_3p  | 3402786 | CD4       | -0.76 | 0.31 | -2.47 | 1.40E-02 | 0.13 | case    |
| miR_20b_5p  | 2431112 | NOTCH2    | -0.55 | 0.22 | -2.47 | 1.40E-02 | 0.13 | case    |
| miR_106b_5p | 2448232 | TPR       | -0.43 | 0.18 | -2.47 | 1.40E-02 | 0.13 | control |
| miR_197_3p  | 2407439 | SF3A3     | -0.95 | 0.38 | -2.47 | 1.40E-02 | 0.13 | control |

|              |         |          |       |      |       |          |      |         |
|--------------|---------|----------|-------|------|-------|----------|------|---------|
| miR_210      | 3375340 | CPSF7    | -0.7  | 0.28 | -2.46 | 1.40E-02 | 0.13 | case    |
| miR_221_3p   | 2623154 | RBM15B   | -0.85 | 0.35 | -2.46 | 1.40E-02 | 0.13 | case    |
| miR_590_5p   | 2564816 | ANKRD36B | -0.18 | 0.07 | -2.46 | 1.40E-02 | 0.13 | control |
| miR_221_3p   | 3204019 | C9orf25  | -1.21 | 0.49 | -2.46 | 1.40E-02 | 0.13 | case    |
| miR_629_5p   | 2663295 | TMEM40   | -0.92 | 0.37 | -2.46 | 1.40E-02 | 0.13 | control |
| miR_106a_5p  | 3075778 | HIPK2    | -0.66 | 0.27 | -2.46 | 1.40E-02 | 0.13 | case    |
| miR_197_3p   | 3841260 | CNOT3    | -1.08 | 0.44 | -2.46 | 1.40E-02 | 0.13 | case    |
| miR_664_3p   | 2383859 | GUK1     | -0.35 | 0.14 | -2.46 | 1.40E-02 | 0.13 | control |
| miR_20a_5p   | 2813414 | CCNB1    | -0.72 | 0.29 | -2.46 | 1.40E-02 | 0.13 | control |
| miR_93_5p    | 3428268 | GAS2L3   | -0.47 | 0.19 | -2.46 | 1.40E-02 | 0.13 | control |
| miR_424_3p   | 2867836 | GLRX     | -0.54 | 0.22 | -2.46 | 1.40E-02 | 0.13 | control |
| miR_106a_5p  | 2495446 | INPP4A   | -0.72 | 0.29 | -2.46 | 1.40E-02 | 0.13 | case    |
| miR_148a_3p  | 3381607 | RAB6A    | -0.53 | 0.22 | -2.46 | 1.40E-02 | 0.13 | control |
| miR_1275     | 3464622 | CEP290   | 0.54  | 0.22 | 2.46  | 1.40E-02 | 0.13 | case    |
| let_7d_3p    | 3263790 | SMC3     | 0.31  | 0.12 | 2.46  | 1.40E-02 | 0.13 | control |
| miR_106a_5p  | 2438657 | ARHGEF11 | -0.81 | 0.33 | -2.45 | 1.40E-02 | 0.13 | case    |
| let_7d_3p    | 3223928 | STOM     | 0.33  | 0.13 | 2.45  | 1.40E-02 | 0.13 | control |
| miR_339_3p   | 2353988 | FAM46C   | -0.54 | 0.22 | -2.45 | 1.40E-02 | 0.13 | control |
| miR_210      | 3774029 | NPLOC4   | -0.49 | 0.2  | -2.45 | 1.40E-02 | 0.13 | case    |
| miR_130b_3p  | 3199207 | NFIB     | -0.77 | 0.32 | -2.45 | 1.40E-02 | 0.13 | control |
| miR_221_3p   | 2326640 | ARID1A   | -0.93 | 0.38 | -2.45 | 1.40E-02 | 0.13 | case    |
| miR_29b_2_5p | 3772525 | CYTH1    | -0.79 | 0.32 | -2.45 | 1.40E-02 | 0.13 | case    |
| miR_144_5p   | 3896078 | SLC23A2  | -0.44 | 0.18 | -2.45 | 1.40E-02 | 0.13 | case    |
| miR_155_5p   | 3742727 | DHX33    | -1.03 | 0.42 | -2.45 | 1.40E-02 | 0.13 | case    |
| let_7e_5p    | 3245682 | MAPK8    | 0.47  | 0.19 | 2.45  | 1.40E-02 | 0.13 | case    |
| miR_221_3p   | 2347132 | FNBP1L   | -0.44 | 0.18 | -2.45 | 1.40E-02 | 0.13 | control |
| let_7g_5p    | 3029030 | CASP2    | -0.88 | 0.36 | -2.45 | 1.40E-02 | 0.13 | case    |
| miR_148a_3p  | 2475209 | PPP1CB   | -0.51 | 0.21 | -2.45 | 1.40E-02 | 0.13 | control |
| miR_152      | 3105600 | CA2      | -0.41 | 0.17 | -2.45 | 1.40E-02 | 0.13 | control |
| miR_301a_3p  | 2559967 | DCTN1    | -0.71 | 0.29 | -2.45 | 1.40E-02 | 0.13 | case    |
| miR_144_5p   | 3848243 | INSR     | -0.56 | 0.23 | -2.45 | 1.40E-02 | 0.13 | case    |
| miR_590_5p   | 2384562 | RAB4A    | -0.3  | 0.12 | -2.45 | 1.40E-02 | 0.13 | control |
| miR_1275     | 3432754 | PLBD2    | -0.95 | 0.39 | -2.45 | 1.40E-02 | 0.13 | case    |
| let_7b_5p    | 2504328 | GYPC     | -0.36 | 0.15 | -2.45 | 1.40E-02 | 0.13 | control |
| miR_454_3p   | 2893562 | RREB1    | -0.88 | 0.36 | -2.44 | 1.50E-02 | 0.13 | case    |
| miR_378a_5p  | 3646000 | DNASE1   | -1.31 | 0.54 | -2.44 | 1.50E-02 | 0.13 | case    |
| miR_148a_3p  | 2954506 | CRIP3    | 0.73  | 0.3  | 2.44  | 1.50E-02 | 0.13 | control |
| miR_20a_5p   | 2504328 | GYPC     | -0.39 | 0.16 | -2.44 | 1.50E-02 | 0.13 | control |

|             |         |          |       |      |       |          |      |         |
|-------------|---------|----------|-------|------|-------|----------|------|---------|
| miR_642a_5p | 2555630 | CCT4     | -0.92 | 0.38 | -2.44 | 1.50E-02 | 0.13 | control |
| miR_155_5p  | 3431892 | SH2B3    | -1.23 | 0.5  | -2.44 | 1.50E-02 | 0.13 | case    |
| miR_197_3p  | 2574646 | BIN1     | -1.42 | 0.58 | -2.44 | 1.50E-02 | 0.13 | case    |
| miR_29a_5p  | 3998839 | FAM9A    | 2.49  | 1.02 | 2.44  | 1.50E-02 | 0.13 | case    |
| miR_942     | 3235414 | SEC61A2  | 0.59  | 0.24 | 2.44  | 1.50E-02 | 0.13 | case    |
| miR_210     | 2708922 | IGF2BP2  | -0.29 | 0.12 | -2.44 | 1.50E-02 | 0.13 | control |
| miR_432_5p  | 3168102 | CREB3    | 6.04  | 2.48 | 2.44  | 1.50E-02 | 0.13 | control |
| miR_146b_5p | 2580699 | FLJ32955 | 0.89  | 0.36 | 2.44  | 1.50E-02 | 0.13 | control |
| miR_10a_5p  | 3430620 | WSCD2    | 1.08  | 0.44 | 2.44  | 1.50E-02 | 0.13 | case    |
| miR_181a_5p | 3719980 | LASP1    | -0.7  | 0.29 | -2.44 | 1.50E-02 | 0.13 | case    |
| miR_16_1_3p | 3713195 | SMCR8    | -0.78 | 0.32 | -2.44 | 1.50E-02 | 0.13 | case    |
| miR_425_3p  | 4017381 | TSC22D3  | -0.69 | 0.28 | -2.44 | 1.50E-02 | 0.13 | control |
| miR_454_3p  | 3764738 | SKA2     | 0.32  | 0.13 | 2.44  | 1.50E-02 | 0.13 | case    |
| miR_24_3p   | 2726323 | SLAIN2   | -1.19 | 0.49 | -2.44 | 1.50E-02 | 0.13 | control |
| miR_197_3p  | 3667281 | SF3B3    | -0.73 | 0.3  | -2.44 | 1.50E-02 | 0.13 | case    |
| miR_144_5p  | 3188697 | NEK6     | -0.44 | 0.18 | -2.44 | 1.50E-02 | 0.13 | case    |
| miR_93_5p   | 2713555 | KIAA0226 | -0.82 | 0.34 | -2.44 | 1.50E-02 | 0.13 | case    |
| miR_590_5p  | 2775858 | LIN54    | -0.37 | 0.15 | -2.44 | 1.50E-02 | 0.13 | control |
| miR_574_3p  | 3331603 | C11orf31 | -0.52 | 0.21 | -2.44 | 1.50E-02 | 0.13 | case    |
| miR_502_3p  | 3428268 | GAS2L3   | -0.51 | 0.21 | -2.44 | 1.50E-02 | 0.13 | control |
| miR_197_3p  | 3544387 | EIF2B2   | -0.92 | 0.38 | -2.44 | 1.50E-02 | 0.13 | case    |
| miR_210     | 3733938 | COG1     | -0.63 | 0.26 | -2.44 | 1.50E-02 | 0.13 | case    |
| miR_628_3p  | 2993639 | CBX3     | 0.54  | 0.22 | 2.44  | 1.50E-02 | 0.13 | case    |
| miR_660_5p  | 2437577 | YY1AP1   | -0.68 | 0.28 | -2.44 | 1.50E-02 | 0.13 | control |
| miR_301a_3p | 3203990 | KIAA1161 | 0.53  | 0.22 | 2.44  | 1.50E-02 | 0.13 | control |
| miR_221_3p  | 2623180 | RAD54L2  | -0.66 | 0.27 | -2.43 | 1.50E-02 | 0.13 | case    |
| miR_210     | 3329404 | ATG13    | -0.63 | 0.26 | -2.43 | 1.50E-02 | 0.13 | case    |
| miR_24_2_5p | 3655140 | NFATC2IP | -1.22 | 0.5  | -2.43 | 1.50E-02 | 0.13 | case    |
| let_7c      | 3894765 | SIRPG    | -0.53 | 0.22 | -2.43 | 1.50E-02 | 0.13 | case    |
| miR_1275    | 2788800 | PRMT10   | 0.62  | 0.25 | 2.43  | 1.50E-02 | 0.13 | case    |
| miR_93_5p   | 2347132 | FNBP1L   | -0.42 | 0.17 | -2.43 | 1.50E-02 | 0.13 | control |
| miR_210     | 3262198 | PDCD11   | -0.67 | 0.28 | -2.43 | 1.50E-02 | 0.13 | case    |
| miR_93_5p   | 2359817 | INTS3    | -0.63 | 0.26 | -2.43 | 1.50E-02 | 0.13 | case    |
| let_7d_3p   | 3257670 | PCGF5    | 0.26  | 0.11 | 2.43  | 1.50E-02 | 0.13 | control |
| miR_210     | 3821908 | RNASEH2A | -0.66 | 0.27 | -2.43 | 1.50E-02 | 0.13 | case    |
| miR_24_2_5p | 3662444 | NLRCS    | -0.93 | 0.38 | -2.43 | 1.50E-02 | 0.13 | case    |
| miR_210     | 3667281 | SF3B3    | -0.43 | 0.18 | -2.43 | 1.50E-02 | 0.13 | case    |
| miR_17_5p   | 2411228 | STIL     | -0.51 | 0.21 | -2.43 | 1.50E-02 | 0.13 | control |

|              |         |           |       |      |       |          |      |         |
|--------------|---------|-----------|-------|------|-------|----------|------|---------|
| miR_197_3p   | 3846011 | SGTA      | -1.48 | 0.61 | -2.43 | 1.50E-02 | 0.13 | case    |
| miR_328      | 3756344 | SMARCE1   | 1.19  | 0.49 | 2.43  | 1.50E-02 | 0.13 | control |
| miR_142_5p   | 3090053 | SLC25A37  | -0.45 | 0.19 | -2.43 | 1.50E-02 | 0.13 | control |
| miR_628_3p   | 3837895 | SPHK2     | 1.3   | 0.53 | 2.43  | 1.50E-02 | 0.13 | control |
| miR_25_5p    | 3453405 | FKBP11    | -0.65 | 0.27 | -2.43 | 1.50E-02 | 0.13 | case    |
| miR_93_5p    | 3605832 | ZNF592    | -0.75 | 0.31 | -2.43 | 1.50E-02 | 0.13 | case    |
| miR_16_1_3p  | 3065963 | ORC5      | -0.7  | 0.29 | -2.43 | 1.50E-02 | 0.13 | control |
| miR_29b_2_5p | 3563395 | POLE2     | -0.42 | 0.17 | -2.43 | 1.50E-02 | 0.13 | control |
| miR_504      | 4022335 | TFDP3     | 1.01  | 0.42 | 2.43  | 1.50E-02 | 0.13 | control |
| miR_197_3p   | 3507710 | SLC7A1    | -0.99 | 0.41 | -2.43 | 1.50E-02 | 0.13 | case    |
| miR_329      | 2620448 | CLEC3B    | 1.85  | 0.76 | 2.43  | 1.50E-02 | 0.13 | case    |
| miR_181a_5p  | 2353988 | FAM46C    | -0.61 | 0.25 | -2.43 | 1.50E-02 | 0.13 | control |
| miR_20b_5p   | 2793401 | MFAP3L    | -0.49 | 0.2  | -2.43 | 1.50E-02 | 0.13 | control |
| miR_20a_5p   | 2907018 | TAF8      | -0.56 | 0.23 | -2.42 | 1.50E-02 | 0.13 | case    |
| miR_15b_3p   | 2488252 | DYSF      | -0.39 | 0.16 | -2.42 | 1.50E-02 | 0.13 | control |
| miR_301a_3p  | 2363084 | NCSTN     | -0.6  | 0.25 | -2.42 | 1.50E-02 | 0.13 | case    |
| miR_24_2_5p  | 3393200 | PCSK7     | -0.83 | 0.34 | -2.42 | 1.50E-02 | 0.13 | case    |
| miR_150_5p   | 2566021 | ACTR1B    | -1.5  | 0.62 | -2.42 | 1.50E-02 | 0.13 | control |
| miR_20b_5p   | 2591837 | SLC40A1   | -0.47 | 0.2  | -2.42 | 1.50E-02 | 0.13 | control |
| miR_140_5p   | 3082181 | NCAPG2    | -1.1  | 0.46 | -2.42 | 1.60E-02 | 0.13 | control |
| miR_342_3p   | 2407439 | SF3A3     | -0.93 | 0.39 | -2.42 | 1.60E-02 | 0.13 | control |
| miR_155_5p   | 3605832 | ZNF592    | -0.76 | 0.31 | -2.42 | 1.60E-02 | 0.13 | case    |
| miR_148b_5p  | 2904877 | MAPK14    | -0.61 | 0.25 | -2.42 | 1.60E-02 | 0.13 | control |
| let_7d_3p    | 3732448 | BPTF      | 0.37  | 0.15 | 2.42  | 1.60E-02 | 0.13 | control |
| let_7d_5p    | 3821095 | TSPAN16   | -0.43 | 0.18 | -2.42 | 1.60E-02 | 0.13 | case    |
| let_7c       | 3949097 | TRMU      | 0.69  | 0.29 | 2.42  | 1.60E-02 | 0.13 | control |
| miR_106a_5p  | 2591837 | SLC40A1   | -0.5  | 0.21 | -2.42 | 1.60E-02 | 0.13 | control |
| miR_222_3p   | 3357279 | VPS26B    | -0.5  | 0.21 | -2.42 | 1.60E-02 | 0.13 | case    |
| miR_197_3p   | 3415812 | ZNF740    | -0.89 | 0.37 | -2.42 | 1.60E-02 | 0.13 | case    |
| miR_301a_3p  | 3036985 | RNF216    | -0.66 | 0.27 | -2.41 | 1.60E-02 | 0.13 | case    |
| miR_454_3p   | 3682445 | XYLT1     | -0.61 | 0.25 | -2.41 | 1.60E-02 | 0.13 | case    |
| let_7b_5p    | 3739668 | VPS53     | -0.62 | 0.26 | -2.41 | 1.60E-02 | 0.13 | case    |
| miR_20b_5p   | 3065546 | DPY19L2P2 | 0.18  | 0.07 | 2.41  | 1.60E-02 | 0.13 | case    |
| miR_106a_5p  | 2779992 | UBE2D3    | -0.92 | 0.38 | -2.41 | 1.60E-02 | 0.13 | control |
| miR_1275     | 2842157 | HRH2      | -0.44 | 0.18 | -2.41 | 1.60E-02 | 0.13 | case    |
| miR_720      | 2999676 | SPDYE1    | -0.45 | 0.19 | -2.41 | 1.60E-02 | 0.13 | case    |
| miR_210      | 3192653 | GTF3C5    | -0.73 | 0.3  | -2.41 | 1.60E-02 | 0.13 | case    |
| miR_22_3p    | 3697632 | ZNF23     | -0.74 | 0.31 | -2.41 | 1.60E-02 | 0.13 | control |

|             |         |           |       |      |       |          |      |         |
|-------------|---------|-----------|-------|------|-------|----------|------|---------|
| miR_301a_3p | 3014411 | TRRAP     | -0.53 | 0.22 | -2.41 | 1.60E-02 | 0.13 | case    |
| miR_197_3p  | 2655650 | PSMD2     | -0.77 | 0.32 | -2.41 | 1.60E-02 | 0.13 | case    |
| miR_324_3p  | 2881860 | CCDC69    | -0.85 | 0.35 | -2.41 | 1.60E-02 | 0.13 | case    |
| miR_17_5p   | 2624291 | PRKCD     | -0.52 | 0.21 | -2.41 | 1.60E-02 | 0.13 | case    |
| miR_210     | 3479181 | POLE      | -0.82 | 0.34 | -2.41 | 1.60E-02 | 0.13 | case    |
| miR_106a_5p | 2359817 | INTS3     | -0.55 | 0.23 | -2.41 | 1.60E-02 | 0.13 | case    |
| miR_301a_3p | 2623180 | RAD54L2   | -0.49 | 0.2  | -2.41 | 1.60E-02 | 0.13 | case    |
| miR_744_5p  | 2353988 | FAM46C    | -0.78 | 0.32 | -2.41 | 1.60E-02 | 0.13 | control |
| miR_324_3p  | 3872928 | ZNF132    | -0.86 | 0.36 | -2.41 | 1.60E-02 | 0.13 | case    |
| miR_221_3p  | 2958670 | RAB23     | -0.47 | 0.19 | -2.41 | 1.60E-02 | 0.13 | control |
| miR_222_3p  | 3961932 | TOB2      | -0.76 | 0.32 | -2.41 | 1.60E-02 | 0.13 | case    |
| miR_106a_5p | 2624291 | PRKCD     | -0.5  | 0.21 | -2.41 | 1.60E-02 | 0.13 | case    |
| miR_197_3p  | 3742727 | DHX33     | -1.28 | 0.53 | -2.41 | 1.60E-02 | 0.13 | case    |
| miR_20a_5p  | 2400518 | ECE1      | -0.4  | 0.17 | -2.41 | 1.60E-02 | 0.13 | case    |
| miR_197_3p  | 2954678 | XPO5      | -1.17 | 0.48 | -2.41 | 1.60E-02 | 0.13 | case    |
| miR_210     | 3129465 | INTS9     | -0.6  | 0.25 | -2.41 | 1.60E-02 | 0.13 | case    |
| miR_629_3p  | 3454331 | LIMA1     | 1     | 0.42 | 2.41  | 1.60E-02 | 0.13 | control |
| miR_106a_5p | 2353988 | FAM46C    | -0.52 | 0.21 | -2.4  | 1.60E-02 | 0.13 | control |
| miR_132_3p  | 2451463 | ADIPOR1   | -0.65 | 0.27 | -2.4  | 1.60E-02 | 0.13 | control |
| miR_196b_5p | 2332583 | CCDC30    | -0.5  | 0.21 | -2.4  | 1.60E-02 | 0.13 | control |
| miR_301a_3p | 2320762 | VPS13D    | -0.55 | 0.23 | -2.4  | 1.60E-02 | 0.13 | case    |
| miR_210     | 3551566 | EVL       | -0.58 | 0.24 | -2.4  | 1.60E-02 | 0.13 | case    |
| miR_197_3p  | 3794056 | TSHZ1     | -1.14 | 0.47 | -2.4  | 1.60E-02 | 0.13 | case    |
| let_7b_5p   | 2484841 | B3GNT2    | 0.53  | 0.22 | 2.4   | 1.60E-02 | 0.13 | case    |
| miR_106a_5p | 2901913 | TUBB      | -0.55 | 0.23 | -2.4  | 1.60E-02 | 0.13 | case    |
| let_7c      | 3293537 | PCBD1     | 0.65  | 0.27 | 2.4   | 1.60E-02 | 0.13 | control |
| miR_155_5p  | 2893562 | RREB1     | -1.12 | 0.47 | -2.4  | 1.60E-02 | 0.13 | case    |
| miR_152     | 3375340 | CPSF7     | -0.85 | 0.35 | -2.4  | 1.60E-02 | 0.13 | case    |
| miR_106b_5p | 2726323 | SLAIN2    | -0.7  | 0.29 | -2.4  | 1.60E-02 | 0.13 | control |
| miR_10a_5p  | 3129065 | CLU       | 0.41  | 0.17 | 2.4   | 1.60E-02 | 0.13 | case    |
| miR_210     | 3816380 | OAZ1      | -0.65 | 0.27 | -2.4  | 1.60E-02 | 0.13 | control |
| miR_148a_3p | 3573994 | C14orf145 | -0.32 | 0.13 | -2.4  | 1.60E-02 | 0.13 | control |
| miR_146a_5p | 2318637 | VAMP3     | -0.91 | 0.38 | -2.4  | 1.60E-02 | 0.13 | control |
| miR_106a_5p | 2890413 | RNF130    | -0.54 | 0.23 | -2.4  | 1.60E-02 | 0.13 | control |
| miR_1275    | 3840142 | ZNF480    | 0.42  | 0.18 | 2.4   | 1.60E-02 | 0.13 | case    |
| miR_590_5p  | 3029030 | CASP2     | -0.46 | 0.19 | -2.4  | 1.60E-02 | 0.13 | case    |
| miR_301a_3p | 3702293 | MBTPS1    | -0.68 | 0.29 | -2.4  | 1.60E-02 | 0.13 | case    |
| miR_212_3p  | 3251353 | ANAPC16   | -0.56 | 0.23 | -2.4  | 1.60E-02 | 0.13 | control |

|             |         |           |       |      |       |          |      |         |
|-------------|---------|-----------|-------|------|-------|----------|------|---------|
| miR_182_5p  | 2599901 | C2orf24   | -0.34 | 0.14 | -2.4  | 1.60E-02 | 0.13 | control |
| miR_197_3p  | 3980745 | FOXO4     | -0.73 | 0.31 | -2.4  | 1.60E-02 | 0.13 | case    |
| miR_103a_3p | 3563861 | CDKL1     | -1.36 | 0.56 | -2.4  | 1.60E-02 | 0.13 | control |
| miR_93_5p   | 3029030 | CASP2     | -0.95 | 0.4  | -2.4  | 1.60E-02 | 0.13 | case    |
| miR_18a_3p  | 3837269 | GPR77     | -0.49 | 0.2  | -2.4  | 1.60E-02 | 0.13 | control |
| miR_210     | 3820443 | ICAM1     | -0.65 | 0.27 | -2.4  | 1.60E-02 | 0.13 | case    |
| miR_93_5p   | 3065546 | DPY19L2P2 | 0.2   | 0.08 | 2.4   | 1.60E-02 | 0.13 | case    |
| miR_106b_5p | 2539607 | MBOAT2    | -0.42 | 0.18 | -2.4  | 1.60E-02 | 0.13 | control |
| miR_146b_5p | 2326448 | SH3BGRL3  | -0.61 | 0.25 | -2.4  | 1.60E-02 | 0.13 | control |
| miR_590_5p  | 2834093 | TCERG1    | -0.32 | 0.13 | -2.4  | 1.60E-02 | 0.13 | control |
| miR_590_5p  | 3095719 | GOLGA7    | -0.32 | 0.13 | -2.4  | 1.60E-02 | 0.13 | control |
| miR_1275    | 3867928 | NOSIP     | -0.55 | 0.23 | -2.4  | 1.60E-02 | 0.13 | control |
| miR_301a_3p | 3737274 | RNF213    | -0.37 | 0.15 | -2.4  | 1.60E-02 | 0.13 | case    |
| miR_144_5p  | 3131741 | RAB11FIP1 | -0.33 | 0.14 | -2.4  | 1.60E-02 | 0.13 | case    |
| miR_20b_5p  | 3623865 | SPPL2A    | 0.58  | 0.24 | 2.4   | 1.70E-02 | 0.13 | case    |
| miR_106a_5p | 2954025 | TRERF1    | -1.08 | 0.45 | -2.4  | 1.70E-02 | 0.13 | case    |
| miR_590_5p  | 2584018 | DPP4      | -0.22 | 0.09 | -2.4  | 1.70E-02 | 0.13 | control |
| miR_301a_3p | 3741997 | ANKFY1    | -0.52 | 0.22 | -2.4  | 1.70E-02 | 0.13 | case    |
| miR_106b_5p | 2450345 | KIF14     | -0.56 | 0.24 | -2.4  | 1.70E-02 | 0.13 | control |
| let_7e_5p   | 3061651 | BET1      | 0.38  | 0.16 | 2.4   | 1.70E-02 | 0.13 | case    |
| miR_138_5p  | 3631214 | TLE3      | -0.89 | 0.37 | -2.39 | 1.70E-02 | 0.13 | case    |
| miR_18a_3p  | 2610732 | ATG7      | -0.7  | 0.29 | -2.39 | 1.70E-02 | 0.13 | control |
| miR_744_5p  | 3590853 | CAPN3     | -0.86 | 0.36 | -2.39 | 1.70E-02 | 0.13 | case    |
| miR_181a_5p | 3381607 | RAB6A     | -0.8  | 0.33 | -2.39 | 1.70E-02 | 0.13 | control |
| miR_210     | 3558145 | CIDEB     | -0.51 | 0.21 | -2.39 | 1.70E-02 | 0.13 | case    |
| miR_433     | 2694520 | KIAA1257  | -1.44 | 0.6  | -2.39 | 1.70E-02 | 0.13 | case    |
| miR_422a    | 2326496 | DHDDS     | -0.73 | 0.3  | -2.39 | 1.70E-02 | 0.13 | case    |
| miR_1275    | 3320717 | MICAL2    | -0.33 | 0.14 | -2.39 | 1.70E-02 | 0.13 | case    |
| miR_18a_3p  | 2674179 | USP4      | -0.61 | 0.25 | -2.39 | 1.70E-02 | 0.13 | control |
| miR_197_3p  | 3402506 | CD27      | -0.88 | 0.37 | -2.39 | 1.70E-02 | 0.13 | case    |
| miR_193a_5p | 2609960 | TTL3      | -0.93 | 0.39 | -2.39 | 1.70E-02 | 0.13 | case    |
| miR_210     | 3656760 | STX4      | -0.6  | 0.25 | -2.39 | 1.70E-02 | 0.13 | case    |
| miR_18a_3p  | 3722152 | PSME3     | -0.62 | 0.26 | -2.39 | 1.70E-02 | 0.13 | control |
| miR_1227    | 3763270 | MMD       | 0.24  | 0.1  | 2.39  | 1.70E-02 | 0.13 | case    |
| miR_93_5p   | 3763656 | TRIM25    | -0.54 | 0.23 | -2.39 | 1.70E-02 | 0.13 | case    |
| miR_301a_3p | 2893562 | RREB1     | -0.91 | 0.38 | -2.39 | 1.70E-02 | 0.13 | case    |
| miR_197_3p  | 3709244 | CHD3      | -0.89 | 0.37 | -2.39 | 1.70E-02 | 0.13 | case    |
| miR_194_5p  | 2834503 | SPINK5    | 1.51  | 0.63 | 2.39  | 1.70E-02 | 0.13 | case    |

|              |         |         |       |      |       |          |      |         |
|--------------|---------|---------|-------|------|-------|----------|------|---------|
| miR_27a_5p   | 3715512 | TNFAIP1 | -0.9  | 0.38 | -2.39 | 1.70E-02 | 0.13 | case    |
| miR_221_3p   | 2610394 | TATDN2  | -0.83 | 0.35 | -2.39 | 1.70E-02 | 0.13 | case    |
| miR_1260a    | 2452977 | FAIM3   | 0.39  | 0.16 | 2.38  | 1.70E-02 | 0.13 | control |
| miR_590_5p   | 2407314 | EPHA10  | 0.59  | 0.25 | 2.38  | 1.70E-02 | 0.13 | control |
| miR_766_3p   | 2498143 | NCK2    | 0.89  | 0.37 | 2.38  | 1.70E-02 | 0.13 | case    |
| miR_103a_3p  | 2724472 | UBE2K   | -0.7  | 0.29 | -2.38 | 1.70E-02 | 0.13 | control |
| miR_15b_5p   | 3373212 | OR4C11  | -0.85 | 0.36 | -2.38 | 1.70E-02 | 0.13 | control |
| miR_106b_5p  | 2775858 | LIN54   | -0.74 | 0.31 | -2.38 | 1.70E-02 | 0.13 | control |
| let_7g_5p    | 2609960 | TLL3    | -0.8  | 0.34 | -2.38 | 1.70E-02 | 0.13 | case    |
| miR_106a_5p  | 2504328 | GYPC    | -0.41 | 0.17 | -2.38 | 1.70E-02 | 0.13 | control |
| miR_24_2_5p  | 3555340 | TEP1    | -1.02 | 0.43 | -2.38 | 1.70E-02 | 0.13 | case    |
| miR_16_5p    | 3623865 | SPPL2A  | 0.62  | 0.26 | 2.38  | 1.70E-02 | 0.13 | case    |
| miR_29b_2_5p | 2662020 | RAD18   | -0.82 | 0.34 | -2.38 | 1.70E-02 | 0.13 | control |
| miR_20a_5p   | 2431112 | NOTCH2  | -0.51 | 0.21 | -2.38 | 1.70E-02 | 0.13 | case    |
| miR_152      | 2609870 | BRPF1   | -0.9  | 0.38 | -2.38 | 1.70E-02 | 0.13 | case    |
| miR_103a_3p  | 2775858 | LIN54   | -0.84 | 0.35 | -2.38 | 1.70E-02 | 0.13 | control |
| miR_1275     | 2928874 | PEX3    | 0.58  | 0.24 | 2.38  | 1.70E-02 | 0.13 | case    |
| let_7d_3p    | 4000370 | FANCB   | 0.29  | 0.12 | 2.38  | 1.70E-02 | 0.13 | control |
| miR_20a_5p   | 2832081 | ZMAT2   | -0.37 | 0.16 | -2.38 | 1.70E-02 | 0.13 | control |
| miR_210      | 2504328 | GYPC    | -0.36 | 0.15 | -2.38 | 1.70E-02 | 0.13 | control |
| miR_222_3p   | 3105600 | CA2     | -0.31 | 0.13 | -2.38 | 1.70E-02 | 0.13 | control |
| miR_103a_3p  | 2779992 | UBE2D3  | -1.09 | 0.46 | -2.38 | 1.70E-02 | 0.13 | control |
| miR_148a_3p  | 2371738 | C1orf26 | -0.3  | 0.12 | -2.38 | 1.80E-02 | 0.13 | control |
| miR_590_5p   | 4041923 | CCNL2   | -0.37 | 0.16 | -2.38 | 1.80E-02 | 0.13 | control |
| miR_941      | 2916716 | PNRC1   | -1.33 | 0.56 | -2.37 | 1.80E-02 | 0.13 | control |
| miR_18a_3p   | 3457160 | CD63    | -1.04 | 0.44 | -2.37 | 1.80E-02 | 0.13 | control |
| miR_301a_3p  | 2333429 | KDM4A   | -0.65 | 0.27 | -2.37 | 1.80E-02 | 0.13 | case    |
| miR_138_5p   | 3678147 | NMRAL1  | -1.12 | 0.47 | -2.37 | 1.80E-02 | 0.13 | control |
| miR_454_3p   | 3605832 | ZNF592  | -0.56 | 0.24 | -2.37 | 1.80E-02 | 0.13 | case    |
| miR_210      | 3680610 | GSPT1   | -0.31 | 0.13 | -2.37 | 1.80E-02 | 0.13 | control |
| miR_1227     | 3399623 | THYN1   | 0.39  | 0.16 | 2.37  | 1.80E-02 | 0.13 | control |
| miR_301a_3p  | 3712363 | MPRIP   | -0.39 | 0.16 | -2.37 | 1.80E-02 | 0.13 | case    |
| miR_335_3p   | 3121023 | C8orf33 | -1.19 | 0.5  | -2.37 | 1.80E-02 | 0.13 | control |
| miR_16_1_3p  | 2620538 | LARS2   | -0.98 | 0.41 | -2.37 | 1.80E-02 | 0.13 | case    |
| miR_210      | 3444252 | CSDA    | -0.31 | 0.13 | -2.37 | 1.80E-02 | 0.13 | control |
| miR_27a_3p   | 2803329 | BASP1   | -0.65 | 0.27 | -2.37 | 1.80E-02 | 0.13 | control |
| miR_197_3p   | 2621827 | ARIH2   | -1    | 0.42 | -2.37 | 1.80E-02 | 0.13 | case    |
| miR_324_3p   | 3304215 | LDB1    | -0.81 | 0.34 | -2.37 | 1.80E-02 | 0.13 | case    |

|              |         |           |       |      |       |          |      |         |
|--------------|---------|-----------|-------|------|-------|----------|------|---------|
| miR_17_5p    | 3336696 | KDM2A     | -0.6  | 0.25 | -2.37 | 1.80E-02 | 0.13 | case    |
| miR_197_3p   | 2881672 | TNIP1     | -1    | 0.42 | -2.37 | 1.80E-02 | 0.13 | case    |
| miR_1275     | 3942179 | MTMR3     | -0.52 | 0.22 | -2.37 | 1.80E-02 | 0.13 | case    |
| miR_628_3p   | 3066436 | PUS7      | -0.77 | 0.32 | -2.37 | 1.80E-02 | 0.13 | control |
| let_7b_5p    | 3320819 | MICALCL   | -0.28 | 0.12 | -2.37 | 1.80E-02 | 0.13 | case    |
| miR_24_3p    | 3720543 | ZBPBP2    | 1.57  | 0.66 | 2.37  | 1.80E-02 | 0.13 | control |
| miR_106b_5p  | 2910477 | FBXO9     | -0.41 | 0.17 | -2.37 | 1.80E-02 | 0.13 | control |
| miR_144_5p   | 3750842 | SGK494    | -0.37 | 0.15 | -2.37 | 1.80E-02 | 0.13 | case    |
| miR_194_5p   | 3768280 | C17orf58  | 0.85  | 0.36 | 2.37  | 1.80E-02 | 0.13 | case    |
| miR_197_3p   | 2545811 | PPM1G     | -0.99 | 0.42 | -2.37 | 1.80E-02 | 0.13 | case    |
| miR_20a_5p   | 2726323 | SLAIN2    | -0.59 | 0.25 | -2.37 | 1.80E-02 | 0.13 | control |
| miR_106a_5p  | 2539607 | MBOAT2    | -0.4  | 0.17 | -2.37 | 1.80E-02 | 0.13 | control |
| miR_106a_5p  | 3336696 | KDM2A     | -0.57 | 0.24 | -2.37 | 1.80E-02 | 0.13 | case    |
| miR_20b_5p   | 2411228 | STIL      | -0.45 | 0.19 | -2.37 | 1.80E-02 | 0.13 | control |
| miR_1227     | 2362282 | OR10Z1    | -0.33 | 0.14 | -2.37 | 1.80E-02 | 0.13 | control |
| miR_374b_5p  | 2954818 | MRPS18A   | -0.52 | 0.22 | -2.36 | 1.80E-02 | 0.13 | control |
| miR_744_5p   | 3317868 | PGAP2     | -0.79 | 0.34 | -2.36 | 1.80E-02 | 0.13 | case    |
| miR_16_1_3p  | 3454006 | FMNL3     | -0.99 | 0.42 | -2.36 | 1.80E-02 | 0.13 | case    |
| miR_19a_3p   | 2401193 | LUZP1     | 1.01  | 0.43 | 2.36  | 1.80E-02 | 0.13 | control |
| miR_197_3p   | 3841474 | LENG8     | -0.89 | 0.38 | -2.36 | 1.80E-02 | 0.13 | case    |
| miR_106a_5p  | 2668205 | GLB1      | -0.53 | 0.22 | -2.36 | 1.80E-02 | 0.13 | case    |
| miR_454_3p   | 2619120 | TRAK1     | -0.65 | 0.28 | -2.36 | 1.80E-02 | 0.13 | case    |
| let_7b_5p    | 4017281 | NUP62CL   | -0.39 | 0.17 | -2.36 | 1.80E-02 | 0.13 | control |
| miR_210      | 3371544 | AMBRA1    | -0.81 | 0.34 | -2.36 | 1.80E-02 | 0.13 | case    |
| let_7b_5p    | 2997376 | ANLN      | -0.6  | 0.25 | -2.36 | 1.80E-02 | 0.13 | control |
| miR_330_3p   | 3944564 | CSF2RB    | -0.74 | 0.31 | -2.36 | 1.80E-02 | 0.13 | control |
| miR_155_5p   | 3435192 | MLXIP     | -0.67 | 0.28 | -2.36 | 1.80E-02 | 0.13 | case    |
| miR_210      | 3682445 | XYLT1     | -0.68 | 0.29 | -2.36 | 1.80E-02 | 0.13 | case    |
| miR_106b_5p  | 2793401 | MFAP3L    | -0.55 | 0.23 | -2.36 | 1.80E-02 | 0.13 | control |
| miR_424_3p   | 3094286 | PROSC     | -0.85 | 0.36 | -2.36 | 1.80E-02 | 0.13 | control |
| miR_320a     | 3978999 | UBQLN2    | -1.25 | 0.53 | -2.36 | 1.80E-02 | 0.13 | case    |
| miR_30c_5p   | 2440476 | F11R      | -1.38 | 0.59 | -2.36 | 1.80E-02 | 0.13 | control |
| let_7d_3p    | 3660858 | CHD9      | 0.29  | 0.12 | 2.36  | 1.80E-02 | 0.13 | control |
| miR_197_3p   | 3885537 | PLCG1     | -0.91 | 0.39 | -2.36 | 1.90E-02 | 0.13 | case    |
| miR_93_5p    | 2591421 | TFPI      | -0.57 | 0.24 | -2.36 | 1.90E-02 | 0.13 | control |
| miR_17_5p    | 3065546 | DPY19L2P2 | 0.19  | 0.08 | 2.35  | 1.90E-02 | 0.13 | case    |
| miR_17_5p    | 2907018 | TAF8      | -0.56 | 0.24 | -2.35 | 1.90E-02 | 0.13 | case    |
| miR_29b_2_5p | 3382216 | ARRB1     | -0.54 | 0.23 | -2.35 | 1.90E-02 | 0.13 | case    |



|             |         |          |       |      |       |          |      |         |
|-------------|---------|----------|-------|------|-------|----------|------|---------|
| miR_301a_3p | 3075566 | ZC3HAV1  | -0.48 | 0.21 | -2.35 | 1.90E-02 | 0.13 | case    |
| miR_181a_5p | 2436754 | ADAR     | -0.54 | 0.23 | -2.35 | 1.90E-02 | 0.13 | case    |
| miR_223_3p  | 3907190 | SLPI     | -0.66 | 0.28 | -2.35 | 1.90E-02 | 0.13 | control |
| miR_20a_5p  | 2394841 | DNAJC11  | -0.53 | 0.23 | -2.35 | 1.90E-02 | 0.13 | case    |
| miR_16_1_3p | 3229529 | CAMSAP1  | -0.82 | 0.35 | -2.35 | 1.90E-02 | 0.13 | case    |
| miR_126_3p  | 2609960 | TTL3     | -0.74 | 0.31 | -2.35 | 1.90E-02 | 0.13 | case    |
| miR_20a_5p  | 2960303 | B3GAT2   | 0.69  | 0.29 | 2.35  | 1.90E-02 | 0.13 | case    |
| miR_221_3p  | 2394841 | DNAJC11  | -0.63 | 0.27 | -2.35 | 1.90E-02 | 0.13 | case    |
| miR_197_3p  | 3385175 | PICALM   | 0.54  | 0.23 | 2.35  | 1.90E-02 | 0.13 | case    |
| miR_590_5p  | 2484457 | KIAA1841 | -0.31 | 0.13 | -2.35 | 1.90E-02 | 0.13 | control |
| miR_590_5p  | 2789957 | FBXW7    | -0.23 | 0.1  | -2.35 | 1.90E-02 | 0.13 | control |
| miR_16_1_3p | 3402571 | NCAPD2   | -0.72 | 0.31 | -2.35 | 1.90E-02 | 0.13 | case    |
| miR_454_3p  | 3304215 | LDB1     | -0.45 | 0.19 | -2.35 | 1.90E-02 | 0.13 | case    |
| miR_197_3p  | 3442396 | PHB2     | -0.8  | 0.34 | -2.35 | 1.90E-02 | 0.13 | case    |
| miR_616_3p  | 2404158 | LAPTM5   | -0.8  | 0.34 | -2.34 | 1.90E-02 | 0.13 | case    |
| miR_148a_3p | 2867432 | ANKRD32  | -0.2  | 0.08 | -2.34 | 1.90E-02 | 0.13 | control |
| miR_629_5p  | 3757770 | STAT5B   | -0.78 | 0.33 | -2.34 | 1.90E-02 | 0.13 | case    |
| miR_16_1_3p | 2406420 | CLSPN    | -0.8  | 0.34 | -2.34 | 1.90E-02 | 0.13 | control |
| miR_133a    | 3284596 | PARD3    | 0.48  | 0.2  | 2.34  | 1.90E-02 | 0.13 | case    |
| miR_628_3p  | 2587618 | OLA1     | -0.69 | 0.29 | -2.34 | 1.90E-02 | 0.13 | control |
| miR_93_5p   | 2901913 | TUBB     | -0.56 | 0.24 | -2.34 | 1.90E-02 | 0.13 | case    |
| miR_210     | 3645881 | ZNF174   | -0.61 | 0.26 | -2.34 | 1.90E-02 | 0.13 | case    |
| miR_939     | 3621160 | ZSCAN29  | -0.59 | 0.25 | -2.34 | 1.90E-02 | 0.13 | case    |
| miR_103a_3p | 3444252 | CSDA     | -0.41 | 0.17 | -2.34 | 1.90E-02 | 0.13 | control |
| miR_24_2_5p | 3755359 | PIP4K2B  | -0.9  | 0.39 | -2.34 | 1.90E-02 | 0.13 | case    |
| let_7c      | 2560149 | CCDC142  | 0.79  | 0.34 | 2.34  | 1.90E-02 | 0.13 | control |
| miR_93_5p   | 2504328 | GYPC     | -0.42 | 0.18 | -2.34 | 1.90E-02 | 0.13 | control |
| miR_93_5p   | 2450345 | KIF14    | -0.57 | 0.24 | -2.34 | 1.90E-02 | 0.13 | control |
| miR_432_5p  | 3318666 | SMPD1    | 4.36  | 1.86 | 2.34  | 1.90E-02 | 0.13 | control |
| miR_196b_5p | 2713016 | C3orf34  | -0.37 | 0.16 | -2.34 | 1.90E-02 | 0.13 | control |
| miR_590_5p  | 2974188 | MED23    | -0.27 | 0.11 | -2.34 | 1.90E-02 | 0.13 | control |
| miR_106b_5p | 2411228 | STIL     | -0.47 | 0.2  | -2.34 | 1.90E-02 | 0.13 | control |
| miR_20b_5p  | 2450345 | KIF14    | -0.54 | 0.23 | -2.34 | 1.90E-02 | 0.13 | control |
| miR_221_3p  | 2485406 | HSPC159  | -0.36 | 0.15 | -2.34 | 1.90E-02 | 0.13 | control |
| miR_130a_3p | 2995254 | C7orf41  | -0.5  | 0.22 | -2.34 | 1.90E-02 | 0.13 | control |
| miR_590_5p  | 2910477 | FBXO9    | -0.19 | 0.08 | -2.34 | 1.90E-02 | 0.13 | control |
| miR_148b_5p | 3196034 | C9orf66  | -0.65 | 0.28 | -2.34 | 1.90E-02 | 0.13 | control |
| miR_222_3p  | 2609960 | TTL3     | -0.66 | 0.28 | -2.34 | 1.90E-02 | 0.13 | case    |

|              |         |           |       |      |       |          |      |         |
|--------------|---------|-----------|-------|------|-------|----------|------|---------|
| miR_10a_5p   | 3678462 | PPL       | 1.07  | 0.46 | 2.34  | 1.90E-02 | 0.13 | case    |
| miR_106a_5p  | 2591421 | TFPI      | -0.56 | 0.24 | -2.34 | 1.90E-02 | 0.13 | control |
| let_7b_5p    | 3320717 | MICAL2    | -0.3  | 0.13 | -2.34 | 2.00E-02 | 0.13 | case    |
| miR_132_3p   | 3464912 | POC1B     | -0.41 | 0.18 | -2.33 | 2.00E-02 | 0.13 | control |
| miR_330_3p   | 2439842 | TAGLN2    | -0.66 | 0.28 | -2.33 | 2.00E-02 | 0.13 | control |
| miR_185_5p   | 3444252 | CSDA      | -0.35 | 0.15 | -2.33 | 2.00E-02 | 0.13 | control |
| miR_193a_5p  | 2662331 | CAMK1     | -0.76 | 0.32 | -2.33 | 2.00E-02 | 0.13 | case    |
| miR_301a_3p  | 3701623 | GAFA2     | -0.31 | 0.13 | -2.33 | 2.00E-02 | 0.13 | case    |
| miR_155_5p   | 3961496 | MKL1      | -0.72 | 0.31 | -2.33 | 2.00E-02 | 0.13 | case    |
| miR_106b_3p  | 3598430 | SLC24A1   | 1.5   | 0.64 | 2.33  | 2.00E-02 | 0.13 | control |
| miR_222_3p   | 2893562 | RREB1     | -0.85 | 0.36 | -2.33 | 2.00E-02 | 0.13 | case    |
| miR_301a_3p  | 2375706 | ATP2B4    | -0.4  | 0.17 | -2.33 | 2.00E-02 | 0.13 | case    |
| miR_221_3p   | 2946681 | HIST1H2BJ | -0.55 | 0.24 | -2.33 | 2.00E-02 | 0.13 | control |
| miR_339_3p   | 2618598 | EIF1B     | -0.38 | 0.16 | -2.33 | 2.00E-02 | 0.13 | control |
| miR_103a_3p  | 2832081 | ZMAT2     | -0.45 | 0.19 | -2.33 | 2.00E-02 | 0.13 | control |
| miR_744_5p   | 2609960 | TLL3      | -1.16 | 0.5  | -2.33 | 2.00E-02 | 0.13 | case    |
| miR_17_5p    | 3428268 | GAS2L3    | -0.45 | 0.19 | -2.33 | 2.00E-02 | 0.13 | control |
| miR_197_3p   | 3743906 | TP53      | -0.79 | 0.34 | -2.33 | 2.00E-02 | 0.13 | case    |
| miR_590_5p   | 2380991 | IARS2     | -0.33 | 0.14 | -2.33 | 2.00E-02 | 0.13 | control |
| miR_320a     | 3923218 | RRP1B     | 1.21  | 0.52 | 2.33  | 2.00E-02 | 0.13 | control |
| miR_20b_5p   | 3428268 | GAS2L3    | -0.41 | 0.18 | -2.33 | 2.00E-02 | 0.13 | control |
| miR_126_5p   | 3779950 | C18orf1   | 0.81  | 0.35 | 2.33  | 2.00E-02 | 0.13 | control |
| miR_1255b_5p | 3892452 | LSM14B    | 0.56  | 0.24 | 2.33  | 2.00E-02 | 0.13 | case    |
| miR_301a_3p  | 2361731 | PRCC      | -0.67 | 0.29 | -2.33 | 2.00E-02 | 0.13 | case    |
| miR_106a_5p  | 2778856 | TSPAN5    | -0.29 | 0.12 | -2.33 | 2.00E-02 | 0.13 | control |
| miR_146a_5p  | 2779992 | UBE2D3    | -0.99 | 0.43 | -2.33 | 2.00E-02 | 0.13 | control |
| miR_301a_3p  | 2903343 | BRD2      | -0.63 | 0.27 | -2.33 | 2.00E-02 | 0.13 | case    |
| miR_370      | 2995254 | C7orf41   | -0.45 | 0.19 | -2.33 | 2.00E-02 | 0.13 | control |
| miR_106a_5p  | 3235726 | OPTN      | -0.32 | 0.14 | -2.33 | 2.00E-02 | 0.13 | control |
| miR_432_5p   | 2560149 | CCDC142   | 4.52  | 1.94 | 2.33  | 2.00E-02 | 0.13 | control |
| miR_210      | 3261544 | GBF1      | -0.49 | 0.21 | -2.32 | 2.00E-02 | 0.13 | case    |
| miR_210      | 3304215 | LDB1      | -0.53 | 0.23 | -2.32 | 2.00E-02 | 0.13 | case    |
| miR_744_5p   | 2591421 | TFPI      | -0.69 | 0.3  | -2.32 | 2.00E-02 | 0.13 | control |
| miR_301a_3p  | 2400518 | ECE1      | -0.35 | 0.15 | -2.32 | 2.00E-02 | 0.13 | case    |
| miR_212_3p   | 2484841 | B3GNT2    | -0.62 | 0.27 | -2.32 | 2.00E-02 | 0.13 | control |
| miR_590_5p   | 2820925 | RHOBTB3   | -0.24 | 0.1  | -2.32 | 2.00E-02 | 0.13 | control |
| miR_193a_5p  | 3907190 | SLPI      | -0.24 | 0.1  | -2.32 | 2.00E-02 | 0.13 | control |
| miR_197_3p   | 3089853 | CHMP7     | -0.92 | 0.4  | -2.32 | 2.00E-02 | 0.13 | case    |

|              |         |         |       |      |       |          |      |         |
|--------------|---------|---------|-------|------|-------|----------|------|---------|
| miR_301a_3p  | 3190463 | ODF2    | -0.57 | 0.25 | -2.32 | 2.00E-02 | 0.13 | case    |
| miR_520f     | 2567583 | RNF149  | -0.64 | 0.27 | -2.32 | 2.00E-02 | 0.13 | control |
| miR_598      | 3096214 | VDAC3   | -0.67 | 0.29 | -2.32 | 2.00E-02 | 0.13 | control |
| miR_221_3p   | 2450345 | KIF14   | -0.59 | 0.25 | -2.32 | 2.00E-02 | 0.13 | control |
| miR_197_3p   | 3762040 | TAC4    | -0.96 | 0.41 | -2.32 | 2.00E-02 | 0.13 | control |
| miR_301a_3p  | 3316447 | AP2A2   | -0.68 | 0.29 | -2.32 | 2.00E-02 | 0.13 | case    |
| miR_138_5p   | 3403015 | ENO2    | -0.91 | 0.39 | -2.32 | 2.00E-02 | 0.13 | control |
| miR_301a_3p  | 3739679 | VPS53   | -0.4  | 0.17 | -2.32 | 2.00E-02 | 0.13 | case    |
| let_7b_5p    | 2352228 | CAPZA1  | 0.36  | 0.16 | 2.32  | 2.00E-02 | 0.13 | case    |
| miR_29b_2_5p | 3203753 | UBAP2   | -0.95 | 0.41 | -2.32 | 2.00E-02 | 0.13 | control |
| miR_193a_5p  | 2954025 | TRERF1  | -1.22 | 0.53 | -2.32 | 2.00E-02 | 0.13 | case    |
| miR_93_5p    | 2495446 | INPP4A  | -0.74 | 0.32 | -2.32 | 2.00E-02 | 0.13 | case    |
| miR_193b_3p  | 3494706 | SLAIN1  | -0.5  | 0.21 | -2.32 | 2.00E-02 | 0.13 | control |
| miR_422a     | 2673902 | QRICH1  | -0.54 | 0.23 | -2.32 | 2.00E-02 | 0.13 | case    |
| miR_144_5p   | 3737338 | RNF213  | -0.23 | 0.1  | -2.32 | 2.00E-02 | 0.13 | case    |
| miR_505_5p   | 2809423 | NDUFS4  | 0.49  | 0.21 | 2.32  | 2.00E-02 | 0.13 | case    |
| miR_106a_5p  | 2623180 | RAD54L2 | -0.54 | 0.23 | -2.32 | 2.00E-02 | 0.13 | case    |
| miR_103a_3p  | 2450345 | KIF14   | -0.61 | 0.26 | -2.32 | 2.00E-02 | 0.13 | control |
| miR_642a_5p  | 3434823 | RNF34   | -1.05 | 0.45 | -2.32 | 2.10E-02 | 0.13 | control |
| miR_340_5p   | 3158114 | SHARPIN | 1.41  | 0.61 | 2.32  | 2.10E-02 | 0.13 | case    |
| let_7d_5p    | 2363084 | NCSTN   | -0.78 | 0.34 | -2.31 | 2.10E-02 | 0.13 | case    |
| miR_301a_3p  | 2907538 | PPP2R5D | -0.64 | 0.28 | -2.31 | 2.10E-02 | 0.13 | case    |
| miR_590_5p   | 2428313 | ST7L    | -0.36 | 0.16 | -2.31 | 2.10E-02 | 0.13 | control |
| miR_197_3p   | 3750625 | POLDIP2 | -0.8  | 0.34 | -2.31 | 2.10E-02 | 0.13 | case    |
| miR_320a     | 3159132 | COMMD5  | 1.5   | 0.65 | 2.31  | 2.10E-02 | 0.13 | control |
| miR_193b_3p  | 2523874 | ICOS    | -0.45 | 0.2  | -2.31 | 2.10E-02 | 0.13 | control |
| miR_181a_5p  | 3264621 | TCF7L2  | -0.47 | 0.2  | -2.31 | 2.10E-02 | 0.13 | case    |
| miR_24_3p    | 3066818 | NAMPT   | -0.96 | 0.41 | -2.31 | 2.10E-02 | 0.13 | control |
| miR_103a_3p  | 2910477 | FBXO9   | -0.45 | 0.2  | -2.31 | 2.10E-02 | 0.13 | control |
| miR_454_3p   | 3980758 | MED12   | -0.38 | 0.16 | -2.31 | 2.10E-02 | 0.13 | case    |
| miR_17_5p    | 3942179 | MTMR3   | -0.56 | 0.24 | -2.31 | 2.10E-02 | 0.13 | case    |
| miR_17_5p    | 2396537 | MTOR    | -0.57 | 0.25 | -2.31 | 2.10E-02 | 0.13 | case    |
| miR_20b_5p   | 3088983 | XPO7    | -0.39 | 0.17 | -2.31 | 2.10E-02 | 0.14 | control |
| miR_103a_3p  | 3088983 | XPO7    | -0.48 | 0.21 | -2.31 | 2.10E-02 | 0.14 | control |
| miR_31_5p    | 2326286 | PDIK1L  | -0.52 | 0.23 | -2.31 | 2.10E-02 | 0.14 | control |
| miR_148b_5p  | 3749767 | TMEM11  | -0.66 | 0.29 | -2.31 | 2.10E-02 | 0.14 | control |
| let_7c       | 3874584 |         | 0.27  | 0.12 | 2.31  | 2.10E-02 | 0.14 | case    |
| miR_222_3p   | 3190463 | ODF2    | -0.5  | 0.22 | -2.31 | 2.10E-02 | 0.14 | case    |

|              |         |           |       |      |       |          |      |         |
|--------------|---------|-----------|-------|------|-------|----------|------|---------|
| miR_222_3p   | 2948425 | PPP1R10   | -0.65 | 0.28 | -2.31 | 2.10E-02 | 0.14 | case    |
| miR_93_5p    | 3074640 | LUZP6     | -0.84 | 0.37 | -2.31 | 2.10E-02 | 0.14 | control |
| miR_301a_3p  | 3908831 | ZNFX1     | -0.35 | 0.15 | -2.31 | 2.10E-02 | 0.14 | case    |
| miR_106a_5p  | 2394841 | DNAJC11   | -0.54 | 0.23 | -2.31 | 2.10E-02 | 0.14 | case    |
| miR_103a_3p  | 3309602 | RGS10     | -0.5  | 0.22 | -2.31 | 2.10E-02 | 0.14 | control |
| miR_29b_2_5p | 3367338 | KIF18A    | -0.71 | 0.31 | -2.31 | 2.10E-02 | 0.14 | control |
| miR_106b_3p  | 3806905 | SMAD2     | 0.36  | 0.16 | 2.3   | 2.10E-02 | 0.14 | case    |
| miR_106b_5p  | 2594812 | TRAK2     | -0.3  | 0.13 | -2.3  | 2.10E-02 | 0.14 | control |
| miR_197_3p   | 3434413 | RNF10     | -0.55 | 0.24 | -2.3  | 2.10E-02 | 0.14 | case    |
| miR_106a_5p  | 2777714 | SNCA      | -0.53 | 0.23 | -2.3  | 2.10E-02 | 0.14 | control |
| miR_625_3p   | 3576014 | C14orf102 | 0.69  | 0.3  | 2.3   | 2.10E-02 | 0.14 | control |
| miR_26a_5p   | 3225096 | NR6A1     | -1.14 | 0.49 | -2.3  | 2.10E-02 | 0.14 | control |
| miR_103a_3p  | 2793401 | MFAP3L    | -0.55 | 0.24 | -2.3  | 2.10E-02 | 0.14 | control |
| miR_193a_5p  | 3874584 |           | 0.28  | 0.12 | 2.3   | 2.10E-02 | 0.14 | case    |
| let_7c       | 3371928 | ARFGAP2   | 0.73  | 0.32 | 2.3   | 2.10E-02 | 0.14 | control |
| miR_17_5p    | 2394841 | DNAJC11   | -0.54 | 0.23 | -2.3  | 2.10E-02 | 0.14 | case    |
| miR_106a_5p  | 2520069 | C2orf88   | -0.29 | 0.13 | -2.3  | 2.10E-02 | 0.14 | control |
| miR_454_3p   | 3737274 | RNF213    | -0.31 | 0.13 | -2.3  | 2.10E-02 | 0.14 | case    |
| let_7d_3p    | 3988740 | PGRMC1    | 0.27  | 0.12 | 2.3   | 2.20E-02 | 0.14 | control |
| miR_301a_3p  | 3096092 | IKBKB     | -0.63 | 0.27 | -2.3  | 2.20E-02 | 0.14 | case    |
| miR_106a_5p  | 2383859 | GUK1      | -0.32 | 0.14 | -2.3  | 2.20E-02 | 0.14 | control |
| miR_106b_5p  | 2779992 | UBE2D3    | -0.91 | 0.4  | -2.3  | 2.20E-02 | 0.14 | control |
| miR_301a_3p  | 2544781 | DTNB      | -0.76 | 0.33 | -2.3  | 2.20E-02 | 0.14 | case    |
| miR_126_3p   | 2726323 | SLAIN2    | -0.57 | 0.25 | -2.3  | 2.20E-02 | 0.14 | control |
| miR_330_3p   | 2662331 | CAMK1     | -0.95 | 0.41 | -2.3  | 2.20E-02 | 0.14 | case    |
| miR_20b_5p   | 2890413 | RNF130    | -0.51 | 0.22 | -2.3  | 2.20E-02 | 0.14 | control |
| miR_148b_3p  | 3317569 |           | -0.43 | 0.19 | -2.3  | 2.20E-02 | 0.14 | case    |
| miR_590_5p   | 2945677 | C6orf62   | -0.26 | 0.11 | -2.3  | 2.20E-02 | 0.14 | control |
| miR_20b_5p   | 3768280 | C17orf58  | 0.56  | 0.24 | 2.3   | 2.20E-02 | 0.14 | case    |
| let_7d_5p    | 2820925 | RHOBTB3   | -0.53 | 0.23 | -2.3  | 2.20E-02 | 0.14 | control |
| miR_19b_3p   | 3090053 | SLC25A37  | -0.53 | 0.23 | -2.3  | 2.20E-02 | 0.14 | control |
| miR_93_5p    | 2877639 | SIL1      | -0.83 | 0.36 | -2.3  | 2.20E-02 | 0.14 | case    |
| miR_423_5p   | 3919834 | CBR3      | -0.49 | 0.21 | -2.3  | 2.20E-02 | 0.14 | case    |
| miR_93_5p    | 2474977 | FOSL2     | -0.89 | 0.39 | -2.3  | 2.20E-02 | 0.14 | case    |
| miR_664_3p   | 3883971 | C20orf24  | -0.61 | 0.27 | -2.3  | 2.20E-02 | 0.14 | control |
| miR_20a_5p   | 2609960 | TLL3      | -0.74 | 0.32 | -2.29 | 2.20E-02 | 0.14 | case    |
| miR_146a_5p  | 2971801 | MAN1A1    | -0.52 | 0.23 | -2.29 | 2.20E-02 | 0.14 | control |
| let_7g_5p    | 3821095 | TSPAN16   | -0.32 | 0.14 | -2.29 | 2.20E-02 | 0.14 | case    |

|              |         |           |       |      |       |          |      |         |
|--------------|---------|-----------|-------|------|-------|----------|------|---------|
| miR_181a_5p  | 2820925 | RHOBTB3   | -0.49 | 0.22 | -2.29 | 2.20E-02 | 0.14 | control |
| miR_590_5p   | 2890605 | MAPK9     | -0.26 | 0.11 | -2.29 | 2.20E-02 | 0.14 | control |
| let_7c       | 3906062 | ZHX3      | 1.25  | 0.55 | 2.29  | 2.20E-02 | 0.14 | control |
| miR_222_3p   | 2545811 | PPM1G     | -0.53 | 0.23 | -2.29 | 2.20E-02 | 0.14 | case    |
| miR_1275     | 3244622 | ALOX5     | -0.47 | 0.21 | -2.29 | 2.20E-02 | 0.14 | case    |
| miR_590_5p   | 2724472 | UBE2K     | -0.28 | 0.12 | -2.29 | 2.20E-02 | 0.14 | control |
| miR_301a_3p  | 2562198 | TGOLN2    | -0.45 | 0.2  | -2.29 | 2.20E-02 | 0.14 | case    |
| miR_301a_3p  | 3293963 | DNAJB12   | -0.82 | 0.36 | -2.29 | 2.20E-02 | 0.14 | case    |
| miR_320a     | 3852880 | EMR2      | -0.58 | 0.25 | -2.29 | 2.20E-02 | 0.14 | case    |
| miR_16_1_3p  | 3741997 | ANKFY1    | -0.71 | 0.31 | -2.29 | 2.20E-02 | 0.14 | case    |
| miR_17_5p    | 2820925 | RHOBTB3   | -0.46 | 0.2  | -2.29 | 2.20E-02 | 0.14 | control |
| miR_1255b_5p | 3127775 | TNFRSF10A | -0.65 | 0.28 | -2.29 | 2.20E-02 | 0.14 | case    |
| miR_93_5p    | 3821095 | TSPAN16   | -0.38 | 0.16 | -2.29 | 2.20E-02 | 0.14 | case    |
| miR_181a_5p  | 3978999 | UBQLN2    | -0.95 | 0.41 | -2.29 | 2.20E-02 | 0.14 | case    |
| miR_24_2_5p  | 3904508 | SLA2      | -0.94 | 0.41 | -2.29 | 2.20E-02 | 0.14 | case    |
| miR_222_3p   | 2361731 | PRCC      | -0.67 | 0.29 | -2.29 | 2.20E-02 | 0.14 | case    |
| miR_181a_5p  | 4027769 | CLIC2     | -0.35 | 0.15 | -2.28 | 2.20E-02 | 0.14 | control |
| miR_181a_5p  | 2971801 | MAN1A1    | -0.53 | 0.23 | -2.28 | 2.20E-02 | 0.14 | control |
| miR_29b_2_5p | 2450345 | KIF14     | -0.62 | 0.27 | -2.28 | 2.20E-02 | 0.14 | control |
| miR_210      | 3830216 | FXYD5     | -0.57 | 0.25 | -2.28 | 2.20E-02 | 0.14 | case    |
| miR_185_5p   | 3682445 | XYLT1     | -0.76 | 0.33 | -2.28 | 2.20E-02 | 0.14 | case    |
| miR_301a_3p  | 2436228 | GATAD2B   | -0.39 | 0.17 | -2.28 | 2.20E-02 | 0.14 | case    |
| miR_181a_5p  | 2995254 | C7orf41   | -0.55 | 0.24 | -2.28 | 2.20E-02 | 0.14 | control |
| miR_210      | 3335952 | PACS1     | -0.48 | 0.21 | -2.28 | 2.20E-02 | 0.14 | case    |
| miR_138_5p   | 3261820 | TRIM8     | -0.97 | 0.42 | -2.28 | 2.30E-02 | 0.14 | case    |
| let_7g_5p    | 2820925 | RHOBTB3   | -0.41 | 0.18 | -2.28 | 2.30E-02 | 0.14 | control |
| miR_590_5p   | 3058944 | HGF       | -0.12 | 0.05 | -2.28 | 2.30E-02 | 0.14 | control |
| miR_222_3p   | 3192653 | GTF3C5    | -0.66 | 0.29 | -2.28 | 2.30E-02 | 0.14 | case    |
| miR_22_3p    | 3400034 | WNK1      | -0.4  | 0.18 | -2.28 | 2.30E-02 | 0.14 | control |
| miR_24_2_5p  | 3272834 | MTG1      | -1.19 | 0.52 | -2.28 | 2.30E-02 | 0.14 | case    |
| miR_106b_5p  | 3309602 | RGS10     | -0.43 | 0.19 | -2.28 | 2.30E-02 | 0.14 | control |
| miR_142_5p   | 3381607 | RAB6A     | -0.77 | 0.34 | -2.28 | 2.30E-02 | 0.14 | control |
| miR_210      | 2644014 | PCCB      | -0.65 | 0.28 | -2.28 | 2.30E-02 | 0.14 | case    |
| let_7d_3p    | 3277662 | UPF2      | 0.27  | 0.12 | 2.28  | 2.30E-02 | 0.14 | control |
| miR_93_5p    | 2954025 | TRERF1    | -1.17 | 0.51 | -2.28 | 2.30E-02 | 0.14 | case    |
| miR_324_3p   | 3053691 | GUSB      | -0.7  | 0.31 | -2.28 | 2.30E-02 | 0.14 | case    |
| miR_20a_5p   | 2793401 | MFAP3L    | -0.44 | 0.19 | -2.28 | 2.30E-02 | 0.14 | control |
| miR_106b_5p  | 2730673 | MOBK1A    | -0.35 | 0.15 | -2.28 | 2.30E-02 | 0.14 | control |

|             |         |              |       |      |       |          |      |         |
|-------------|---------|--------------|-------|------|-------|----------|------|---------|
| miR_184     | 2881860 | CCDC69       | -0.53 | 0.23 | -2.28 | 2.30E-02 | 0.14 | case    |
| miR_210     | 2778856 | TSPAN5       | -0.24 | 0.11 | -2.28 | 2.30E-02 | 0.14 | control |
| miR_301a_3p | 3414632 | DIP2B        | -0.48 | 0.21 | -2.28 | 2.30E-02 | 0.14 | case    |
| miR_22_5p   | 3683018 | RPS15A       | -0.28 | 0.12 | -2.28 | 2.30E-02 | 0.14 | control |
| miR_210     | 3861413 | MAP4K1       | -0.41 | 0.18 | -2.28 | 2.30E-02 | 0.14 | case    |
| miR_106b_5p | 2832081 | ZMAT2        | -0.39 | 0.17 | -2.27 | 2.30E-02 | 0.14 | control |
| miR_340_5p  | 2383859 | GUK1         | 0.6   | 0.26 | 2.27  | 2.30E-02 | 0.14 | case    |
| miR_301a_3p | 2662331 | CAMK1        | -0.69 | 0.31 | -2.27 | 2.30E-02 | 0.14 | case    |
| miR_20b_5p  | 2779992 | UBE2D3       | -0.8  | 0.35 | -2.27 | 2.30E-02 | 0.14 | control |
| miR_221_3p  | 2854445 | DAB2         | -0.54 | 0.24 | -2.27 | 2.30E-02 | 0.14 | control |
| miR_93_5p   | 2624291 | PRKCD        | -0.51 | 0.23 | -2.27 | 2.30E-02 | 0.14 | case    |
| miR_106b_5p | 2396009 | LZIC         | -0.47 | 0.21 | -2.27 | 2.30E-02 | 0.14 | control |
| let_7c      | 3732793 | ARSG         | 0.67  | 0.29 | 2.27  | 2.30E-02 | 0.14 | control |
| miR_148a_3p | 2778980 | EIF4E        | -0.2  | 0.09 | -2.27 | 2.30E-02 | 0.14 | control |
| miR_144_5p  | 3742727 | DHX33        | -0.5  | 0.22 | -2.27 | 2.30E-02 | 0.14 | case    |
| miR_1275    | 3027204 | TBXAS1       | -0.54 | 0.24 | -2.27 | 2.30E-02 | 0.14 | case    |
| miR_16_1_3p | 2496628 | C2orf29      | -1.19 | 0.52 | -2.27 | 2.30E-02 | 0.14 | control |
| miR_27a_5p  | 2829171 | TCF7         | -0.58 | 0.25 | -2.27 | 2.30E-02 | 0.14 | case    |
| miR_378a_5p | 3417435 | MYL6B        | -1.11 | 0.49 | -2.27 | 2.30E-02 | 0.14 | case    |
| miR_197_3p  | 3956781 | AP1B1        | -0.83 | 0.36 | -2.27 | 2.30E-02 | 0.14 | case    |
| miR_320a    | 3458857 | AVIL         | -1.05 | 0.46 | -2.27 | 2.30E-02 | 0.14 | case    |
| miR_106b_5p | 2724154 | KLHL5        | -0.48 | 0.21 | -2.27 | 2.30E-02 | 0.14 | control |
| miR_210     | 2591421 | TFPI         | -0.47 | 0.21 | -2.27 | 2.30E-02 | 0.14 | control |
| miR_301a_3p | 3457752 | STAT2        | -0.36 | 0.16 | -2.27 | 2.30E-02 | 0.14 | case    |
| let_7c      | 3328600 | TSPAN18      | -0.51 | 0.22 | -2.27 | 2.30E-02 | 0.14 | case    |
| miR_148a_3p | 3594986 | TEX9         | -0.18 | 0.08 | -2.27 | 2.30E-02 | 0.14 | control |
| miR_370     | 2779992 | UBE2D3       | -0.79 | 0.35 | -2.27 | 2.30E-02 | 0.14 | control |
| miR_502_3p  | 2466379 | LOC100128185 | 0.54  | 0.24 | 2.27  | 2.30E-02 | 0.14 | control |
| miR_106b_5p | 3066818 | NAMPT        | -0.58 | 0.25 | -2.27 | 2.30E-02 | 0.14 | control |
| miR_197_3p  | 3829020 | PDCD5        | 1.07  | 0.47 | 2.27  | 2.30E-02 | 0.14 | control |
| miR_26b_5p  | 3394092 | SLC37A4      | 0.66  | 0.29 | 2.27  | 2.30E-02 | 0.14 | case    |
| miR_197_3p  | 3250699 | EIF4EBP2     | -0.84 | 0.37 | -2.27 | 2.30E-02 | 0.14 | case    |
| miR_340_5p  | 2737840 | CISD2        | 0.57  | 0.25 | 2.27  | 2.30E-02 | 0.14 | case    |
| miR_454_3p  | 3865715 | SYMPK        | -0.66 | 0.29 | -2.27 | 2.30E-02 | 0.14 | case    |
| miR_196b_5p | 2724472 | UBE2K        | -0.66 | 0.29 | -2.27 | 2.30E-02 | 0.14 | control |
| miR_671_3p  | 2408955 | TMSB4X       | -0.6  | 0.27 | -2.27 | 2.30E-02 | 0.14 | control |
| miR_301a_3p | 3336696 | KDM2A        | -0.48 | 0.21 | -2.27 | 2.30E-02 | 0.14 | case    |
| miR_138_5p  | 3996339 | TAZ          | -0.95 | 0.42 | -2.27 | 2.30E-02 | 0.14 | control |

|              |         |         |       |      |       |          |      |         |
|--------------|---------|---------|-------|------|-------|----------|------|---------|
| miR_7_5p     | 3456260 | ATF7    | -0.4  | 0.18 | -2.26 | 2.40E-02 | 0.14 | case    |
| miR_210      | 3654859 | ATXN2L  | -0.87 | 0.39 | -2.26 | 2.40E-02 | 0.14 | case    |
| miR_197_3p   | 3957003 | ASCC2   | -0.56 | 0.25 | -2.26 | 2.40E-02 | 0.14 | case    |
| miR_148a_3p  | 3910785 | AURKA   | -0.44 | 0.19 | -2.26 | 2.40E-02 | 0.14 | control |
| miR_142_3p   | 3192353 | NTNG2   | -0.66 | 0.29 | -2.26 | 2.40E-02 | 0.14 | control |
| miR_103a_3p  | 2587618 | OLA1    | -0.7  | 0.31 | -2.26 | 2.40E-02 | 0.14 | control |
| miR_671_3p   | 3071700 | IMPDH1  | -1.29 | 0.57 | -2.26 | 2.40E-02 | 0.14 | control |
| miR_222_3p   | 2609870 | BRPF1   | -0.59 | 0.26 | -2.26 | 2.40E-02 | 0.14 | case    |
| miR_501_3p   | 3894765 | SIRPG   | -0.68 | 0.3  | -2.26 | 2.40E-02 | 0.14 | case    |
| miR_532_3p   | 2553576 | RTN4    | -1.5  | 0.66 | -2.26 | 2.40E-02 | 0.14 | control |
| miR_138_5p   | 3603687 | TMED3   | -1.18 | 0.52 | -2.26 | 2.40E-02 | 0.14 | control |
| miR_197_3p   | 2396537 | MTOR    | -0.93 | 0.41 | -2.26 | 2.40E-02 | 0.14 | case    |
| miR_106a_5p  | 2406420 | CLSPN   | -0.55 | 0.24 | -2.26 | 2.40E-02 | 0.14 | control |
| miR_222_3p   | 3724360 | GOSR2   | -0.46 | 0.21 | -2.26 | 2.40E-02 | 0.14 | case    |
| miR_197_3p   | 2331505 | MACF1   | 0.65  | 0.29 | 2.26  | 2.40E-02 | 0.14 | control |
| miR_24_2_5p  | 3961842 | RANGAP1 | -1.22 | 0.54 | -2.26 | 2.40E-02 | 0.14 | case    |
| miR_20a_5p   | 2591421 | TFPI    | -0.48 | 0.21 | -2.26 | 2.40E-02 | 0.14 | control |
| miR_103a_3p  | 2539607 | MBOAT2  | -0.45 | 0.2  | -2.26 | 2.40E-02 | 0.14 | control |
| miR_148b_5p  | 3475782 | GPR109A | -0.51 | 0.22 | -2.26 | 2.40E-02 | 0.14 | control |
| miR_301a_3p  | 3822049 | CALR    | -0.44 | 0.2  | -2.26 | 2.40E-02 | 0.14 | case    |
| miR_17_5p    | 2881860 | CCDC69  | -0.58 | 0.26 | -2.26 | 2.40E-02 | 0.14 | case    |
| miR_29b_2_5p | 3101893 | CSPP1   | -0.41 | 0.18 | -2.26 | 2.40E-02 | 0.14 | control |
| miR_625_5p   | 3445123 | HEBP1   | -0.36 | 0.16 | -2.26 | 2.40E-02 | 0.14 | control |
| miR_320a     | 3757840 | STAT3   | -0.62 | 0.28 | -2.26 | 2.40E-02 | 0.14 | case    |
| miR_329      | 3250019 | DDX50   | -1.21 | 0.54 | -2.26 | 2.40E-02 | 0.14 | case    |
| miR_210      | 2363084 | NCSTN   | -0.58 | 0.26 | -2.26 | 2.40E-02 | 0.14 | case    |
| miR_181a_5p  | 2594812 | TRAK2   | -0.34 | 0.15 | -2.26 | 2.40E-02 | 0.14 | control |
| miR_629_5p   | 3825713 | GATAD2A | -0.93 | 0.41 | -2.25 | 2.40E-02 | 0.14 | case    |
| miR_1227     | 3592484 | PLDN    | 0.37  | 0.16 | 2.25  | 2.40E-02 | 0.14 | case    |
| miR_93_5p    | 2588827 | NFE2L2  | -0.57 | 0.25 | -2.25 | 2.40E-02 | 0.14 | control |
| miR_181a_5p  | 2609960 | TLL3    | -0.87 | 0.39 | -2.25 | 2.40E-02 | 0.14 | case    |
| miR_138_5p   | 3226804 | SH3GLB2 | -1.17 | 0.52 | -2.25 | 2.40E-02 | 0.14 | control |
| miR_20b_5p   | 2503200 | RALB    | -0.42 | 0.19 | -2.25 | 2.40E-02 | 0.14 | control |
| miR_1275     | 2475116 | PLB1    | -0.7  | 0.31 | -2.25 | 2.40E-02 | 0.14 | case    |
| miR_181a_5p  | 3788976 | RAB27B  | -0.38 | 0.17 | -2.25 | 2.40E-02 | 0.14 | control |
| miR_92a_3p   | 2733898 | THAP9   | 1.84  | 0.82 | 2.25  | 2.40E-02 | 0.14 | case    |
| miR_221_3p   | 3608220 | CRTC3   | -0.63 | 0.28 | -2.25 | 2.40E-02 | 0.14 | case    |
| miR_339_3p   | 3747199 | CENPV   | -0.54 | 0.24 | -2.25 | 2.40E-02 | 0.14 | case    |

|             |         |           |       |      |       |          |      |         |
|-------------|---------|-----------|-------|------|-------|----------|------|---------|
| miR_425_3p  | 3819522 | 2-Mar     | 0.54  | 0.24 | 2.25  | 2.40E-02 | 0.14 | control |
| miR_29c_3p  | 3244488 | RASSF4    | -0.57 | 0.25 | -2.25 | 2.40E-02 | 0.14 | case    |
| miR_629_5p  | 3852880 | EMR2      | -0.51 | 0.23 | -2.25 | 2.40E-02 | 0.14 | case    |
| miR_93_5p   | 3336696 | KDM2A     | -0.59 | 0.26 | -2.25 | 2.40E-02 | 0.14 | case    |
| miR_106b_5p | 2447454 | ARPC5     | -1.34 | 0.6  | -2.25 | 2.40E-02 | 0.14 | control |
| miR_301a_3p | 3053691 | GUSB      | -0.52 | 0.23 | -2.25 | 2.40E-02 | 0.14 | case    |
| miR_17_5p   | 3820921 | SMARCA4   | -0.53 | 0.24 | -2.25 | 2.40E-02 | 0.14 | case    |
| miR_106a_5p | 2609960 | TTL3      | -0.78 | 0.35 | -2.25 | 2.40E-02 | 0.14 | case    |
| miR_148b_5p | 3123675 | PPP1R3B   | -0.6  | 0.27 | -2.25 | 2.40E-02 | 0.14 | control |
| miR_320a    | 2361731 | PRCC      | -1.12 | 0.5  | -2.25 | 2.40E-02 | 0.14 | case    |
| miR_106b_5p | 2995254 | C7orf41   | -0.48 | 0.21 | -2.25 | 2.40E-02 | 0.14 | control |
| miR_106a_5p | 2474977 | FOSL2     | -0.81 | 0.36 | -2.25 | 2.40E-02 | 0.14 | case    |
| miR_1275    | 3130823 | C8orf41   | -0.56 | 0.25 | -2.25 | 2.40E-02 | 0.14 | control |
| let_7c      | 2766532 | UBE2K     | -0.66 | 0.3  | -2.25 | 2.50E-02 | 0.14 | control |
| miR_17_5p   | 3372253 | CELF1     | -0.7  | 0.31 | -2.25 | 2.50E-02 | 0.14 | case    |
| miR_181a_5p | 2395245 | RERE      | -0.99 | 0.44 | -2.25 | 2.50E-02 | 0.14 | case    |
| miR_744_5p  | 2620538 | LARS2     | -1.12 | 0.5  | -2.25 | 2.50E-02 | 0.14 | case    |
| miR_424_3p  | 3630099 | TIPIN     | 0.44  | 0.19 | 2.25  | 2.50E-02 | 0.14 | case    |
| miR_301a_3p | 2715820 | HTT       | -0.54 | 0.24 | -2.25 | 2.50E-02 | 0.14 | case    |
| miR_106a_5p | 2726323 | SLAIN2    | -0.58 | 0.26 | -2.25 | 2.50E-02 | 0.14 | control |
| let_7d_3p   | 4022106 | MBNL3     | 0.22  | 0.1  | 2.25  | 2.50E-02 | 0.14 | control |
| miR_197_3p  | 2353477 | ATP1A1    | -0.67 | 0.3  | -2.25 | 2.50E-02 | 0.14 | case    |
| miR_197_3p  | 3851603 | DHPS      | -0.64 | 0.29 | -2.25 | 2.50E-02 | 0.14 | case    |
| miR_106a_5p | 2428313 | ST7L      | -0.72 | 0.32 | -2.25 | 2.50E-02 | 0.14 | control |
| let_7g_5p   | 3477967 |           | -0.35 | 0.16 | -2.25 | 2.50E-02 | 0.14 | case    |
| miR_664_3p  | 3892452 | LSM14B    | 0.4   | 0.18 | 2.25  | 2.50E-02 | 0.14 | case    |
| miR_425_3p  | 2951730 | SLC26A8   | -0.52 | 0.23 | -2.25 | 2.50E-02 | 0.14 | control |
| miR_139_5p  | 2903285 | PSMB9     | -0.71 | 0.31 | -2.25 | 2.50E-02 | 0.14 | control |
| miR_17_5p   | 2562233 | RETSAT    | -0.71 | 0.32 | -2.25 | 2.50E-02 | 0.14 | case    |
| let_7d_3p   | 3788976 | RAB27B    | 0.21  | 0.1  | 2.24  | 2.50E-02 | 0.14 | control |
| miR_532_5p  | 2353988 | FAM46C    | -0.53 | 0.24 | -2.24 | 2.50E-02 | 0.14 | control |
| miR_629_5p  | 3553141 | TECPR2    | -0.68 | 0.3  | -2.24 | 2.50E-02 | 0.14 | case    |
| miR_629_3p  | 2434129 | HIST2H2AB | -0.38 | 0.17 | -2.24 | 2.50E-02 | 0.14 | control |
| miR_766_3p  | 2940202 | F13A1     | 0.27  | 0.12 | 2.24  | 2.50E-02 | 0.14 | case    |
| miR_106a_5p | 2351171 | FAM40A    | -0.81 | 0.36 | -2.24 | 2.50E-02 | 0.14 | case    |
| miR_148a_3p | 2373693 | LHX9      | 0.69  | 0.31 | 2.24  | 2.50E-02 | 0.14 | control |
| miR_106a_5p | 2451463 | ADIPOR1   | -0.45 | 0.2  | -2.24 | 2.50E-02 | 0.14 | control |
| miR_193b_3p | 2864449 | SERINC5   | -0.65 | 0.29 | -2.24 | 2.50E-02 | 0.14 | control |



|              |         |           |       |      |       |          |      |         |
|--------------|---------|-----------|-------|------|-------|----------|------|---------|
| miR_16_1_3p  | 3155937 | TRAPPC9   | -0.86 | 0.38 | -2.24 | 2.50E-02 | 0.14 | case    |
| miR_197_3p   | 3677752 | TRAP1     | -0.95 | 0.42 | -2.24 | 2.50E-02 | 0.14 | case    |
| miR_210      | 3402571 | NCAPD2    | -0.52 | 0.23 | -2.24 | 2.50E-02 | 0.14 | case    |
| miR_93_5p    | 3908831 | ZNFX1     | -0.4  | 0.18 | -2.24 | 2.50E-02 | 0.14 | case    |
| miR_93_5p    | 2361731 | PRCC      | -0.76 | 0.34 | -2.24 | 2.50E-02 | 0.14 | case    |
| miR_7_5p     | 3457752 | STAT2     | -0.25 | 0.11 | -2.24 | 2.50E-02 | 0.14 | case    |
| miR_301a_3p  | 3737338 | RNF213    | -0.33 | 0.15 | -2.24 | 2.50E-02 | 0.14 | case    |
| miR_17_5p    | 3894765 | SIRPG     | -0.5  | 0.22 | -2.24 | 2.50E-02 | 0.14 | case    |
| miR_222_3p   | 3771336 | EXOC7     | -0.44 | 0.2  | -2.24 | 2.50E-02 | 0.14 | case    |
| miR_106a_5p  | 3118651 | DENND3    | -0.57 | 0.25 | -2.24 | 2.50E-02 | 0.14 | case    |
| miR_197_3p   | 2881747 | ANXA6     | -0.64 | 0.29 | -2.24 | 2.50E-02 | 0.14 | case    |
| miR_17_5p    | 3764738 | SKA2      | 0.38  | 0.17 | 2.24  | 2.50E-02 | 0.14 | case    |
| let_7g_5p    | 2437736 | RIT1      | -0.6  | 0.27 | -2.24 | 2.50E-02 | 0.14 | control |
| miR_744_5p   | 3074640 | LUZP6     | -1.15 | 0.51 | -2.24 | 2.50E-02 | 0.14 | control |
| miR_26a_5p   | 2443476 | SELE      | 1.26  | 0.57 | 2.24  | 2.50E-02 | 0.14 | control |
| miR_590_5p   | 3591365 | ADAL      | -0.17 | 0.08 | -2.24 | 2.50E-02 | 0.14 | control |
| miR_148a_3p  | 2752725 | NEIL3     | -0.35 | 0.16 | -2.24 | 2.50E-02 | 0.14 | control |
| miR_150_5p   | 2855058 | OXCT1     | 1.08  | 0.48 | 2.24  | 2.50E-02 | 0.14 | case    |
| miR_1275     | 3848984 | PRAM1     | -0.5  | 0.22 | -2.24 | 2.50E-02 | 0.14 | case    |
| miR_301a_3p  | 2458773 | PARP1     | -0.36 | 0.16 | -2.23 | 2.50E-02 | 0.14 | case    |
| miR_17_5p    | 3203962 | KIF24     | -0.4  | 0.18 | -2.23 | 2.50E-02 | 0.14 | control |
| miR_629_5p   | 2484752 | COMMD1    | -0.54 | 0.24 | -2.23 | 2.60E-02 | 0.14 | case    |
| miR_1275     | 2890148 | HNRNPH1   | 0.52  | 0.23 | 2.23  | 2.60E-02 | 0.14 | case    |
| miR_210      | 3554592 | BTBD6     | -0.36 | 0.16 | -2.23 | 2.60E-02 | 0.14 | case    |
| miR_139_3p   | 2958670 | RAB23     | -0.41 | 0.18 | -2.23 | 2.60E-02 | 0.14 | control |
| miR_744_5p   | 2437736 | RIT1      | -0.87 | 0.39 | -2.23 | 2.60E-02 | 0.14 | control |
| miR_29c_3p   | 3235726 | OPTN      | -0.26 | 0.12 | -2.23 | 2.60E-02 | 0.14 | control |
| miR_301a_3p  | 3557106 | ACIN1     | -0.62 | 0.28 | -2.23 | 2.60E-02 | 0.14 | case    |
| miR_1255b_5p | 3623865 | SPPL2A    | 0.57  | 0.25 | 2.23  | 2.60E-02 | 0.14 | case    |
| miR_301a_3p  | 2359817 | INTS3     | -0.45 | 0.2  | -2.23 | 2.60E-02 | 0.14 | case    |
| miR_505_5p   | 3060917 | MTERF     | 0.43  | 0.19 | 2.23  | 2.60E-02 | 0.14 | case    |
| miR_144_5p   | 2676471 | TMEM110   | -0.36 | 0.16 | -2.23 | 2.60E-02 | 0.14 | case    |
| miR_18a_3p   | 2505957 | PLEKHB2   | -0.68 | 0.31 | -2.23 | 2.60E-02 | 0.14 | control |
| let_7d_3p    | 3573994 | C14orf145 | 0.27  | 0.12 | 2.23  | 2.60E-02 | 0.14 | control |
| miR_197_3p   | 3526831 | RASA3     | -0.73 | 0.33 | -2.23 | 2.60E-02 | 0.14 | case    |
| miR_301a_3p  | 2431112 | NOTCH2    | -0.44 | 0.2  | -2.23 | 2.60E-02 | 0.14 | case    |
| miR_181a_5p  | 2326640 | ARID1A    | -0.87 | 0.39 | -2.23 | 2.60E-02 | 0.14 | case    |
| miR_433      | 2338487 | FGGY      | 1.57  | 0.71 | 2.23  | 2.60E-02 | 0.14 | case    |

|              |         |           |       |      |       |          |      |         |
|--------------|---------|-----------|-------|------|-------|----------|------|---------|
| miR_17_5p    | 2575196 | SAP130    | -0.77 | 0.34 | -2.23 | 2.60E-02 | 0.14 | case    |
| miR_106a_5p  | 3382216 | ARRB1     | -0.43 | 0.19 | -2.23 | 2.60E-02 | 0.14 | case    |
| miR_210      | 3945396 | GTPBP1    | -0.48 | 0.22 | -2.23 | 2.60E-02 | 0.14 | case    |
| miR_192_5p   | 2801608 | 6-Mar     | -0.8  | 0.36 | -2.23 | 2.60E-02 | 0.14 | control |
| miR_505_3p   | 2362201 | CD1C      | -0.44 | 0.2  | -2.23 | 2.60E-02 | 0.14 | control |
| miR_1275     | 3510963 | SUGT1P3   | 0.33  | 0.15 | 2.23  | 2.60E-02 | 0.14 | case    |
| miR_7_1_3p   | 3740264 | INPP5K    | -0.41 | 0.19 | -2.23 | 2.60E-02 | 0.14 | control |
| miR_196b_5p  | 2655955 | VPS8      | -0.44 | 0.2  | -2.23 | 2.60E-02 | 0.14 | control |
| miR_210      | 2327677 | EPB41     | -0.32 | 0.14 | -2.23 | 2.60E-02 | 0.14 | control |
| miR_103a_3p  | 2406420 | CLSPN     | -0.61 | 0.28 | -2.23 | 2.60E-02 | 0.14 | control |
| miR_210      | 3945614 | APOBEC3F  | -0.35 | 0.16 | -2.22 | 2.60E-02 | 0.14 | case    |
| miR_301a_3p  | 3328745 | PRDM11    | 0.76  | 0.34 | 2.22  | 2.60E-02 | 0.14 | control |
| miR_210      | 2694397 | RPN1      | -0.52 | 0.23 | -2.22 | 2.60E-02 | 0.14 | case    |
| miR_660_5p   | 2587618 | OLA1      | -0.67 | 0.3  | -2.22 | 2.60E-02 | 0.14 | control |
| miR_210      | 3890109 | C20orf108 | -0.51 | 0.23 | -2.22 | 2.60E-02 | 0.14 | control |
| miR_106a_5p  | 2437801 | ARHGFE2   | -0.68 | 0.3  | -2.22 | 2.60E-02 | 0.14 | case    |
| miR_29b_2_5p | 2752725 | NEIL3     | -0.46 | 0.21 | -2.22 | 2.60E-02 | 0.14 | control |
| let_7g_5p    | 2779992 | UBE2D3    | -0.8  | 0.36 | -2.22 | 2.60E-02 | 0.14 | control |
| miR_197_3p   | 3935300 | MCM3AP    | -1.06 | 0.48 | -2.22 | 2.60E-02 | 0.14 | case    |
| miR_590_5p   | 3439178 | PXMP2     | -0.39 | 0.18 | -2.22 | 2.60E-02 | 0.14 | case    |
| miR_20b_5p   | 2539607 | MBOAT2    | -0.35 | 0.16 | -2.22 | 2.60E-02 | 0.14 | control |
| miR_1275     | 2698693 | GK5       | 0.47  | 0.21 | 2.22  | 2.60E-02 | 0.14 | case    |
| miR_222_3p   | 3339261 | IL18BP    | -0.68 | 0.31 | -2.22 | 2.60E-02 | 0.14 | case    |
| miR_148b_5p  | 3869237 | FPR1      | -0.51 | 0.23 | -2.22 | 2.60E-02 | 0.14 | control |
| miR_29b_2_5p | 3168508 | MELK      | -0.55 | 0.25 | -2.22 | 2.70E-02 | 0.14 | control |
| miR_155_5p   | 3720739 | CASC3     | -0.66 | 0.3  | -2.22 | 2.70E-02 | 0.14 | case    |
| miR_1255b_5p | 7385696 | SHFM1     | 0.54  | 0.24 | 2.22  | 2.70E-02 | 0.14 | case    |
| miR_22_3p    | 3269373 | ZRANB1    | -0.32 | 0.15 | -2.22 | 2.70E-02 | 0.14 | control |
| miR_1275     | 3927105 | MRPL39    | 0.43  | 0.19 | 2.22  | 2.70E-02 | 0.14 | case    |
| miR_532_5p   | 3372253 | CELF1     | -0.8  | 0.36 | -2.22 | 2.70E-02 | 0.14 | case    |
| miR_210      | 3232349 | PFKP      | -0.64 | 0.29 | -2.22 | 2.70E-02 | 0.14 | case    |
| miR_139_3p   | 2831209 | PAIP2     | -0.54 | 0.24 | -2.22 | 2.70E-02 | 0.14 | control |
| miR_103a_3p  | 3105430 | LRRCC1    | -0.5  | 0.22 | -2.22 | 2.70E-02 | 0.14 | control |
| miR_181a_5p  | 2431112 | NOTCH2    | -0.59 | 0.27 | -2.22 | 2.70E-02 | 0.14 | case    |
| miR_210      | 2359817 | INTS3     | -0.49 | 0.22 | -2.22 | 2.70E-02 | 0.14 | case    |
| miR_454_3p   | 2726323 | SLAIN2    | -0.52 | 0.24 | -2.22 | 2.70E-02 | 0.14 | control |
| miR_193b_3p  | 2862841 | GCNT4     | -0.39 | 0.18 | -2.22 | 2.70E-02 | 0.14 | control |
| miR_425_3p   | 3883971 | C20orf24  | -0.68 | 0.3  | -2.22 | 2.70E-02 | 0.14 | control |

|             |         |          |       |      |       |          |      |         |
|-------------|---------|----------|-------|------|-------|----------|------|---------|
| miR_590_5p  | 2628682 | ARL6IP5  | -0.27 | 0.12 | -2.22 | 2.70E-02 | 0.14 | control |
| miR_106a_5p | 2321911 | DDI2     | -0.5  | 0.23 | -2.21 | 2.70E-02 | 0.14 | control |
| miR_18a_3p  | 3744680 | PIK3R5   | -0.9  | 0.4  | -2.21 | 2.70E-02 | 0.14 | control |
| miR_93_5p   | 2832081 | ZMAT2    | -0.38 | 0.17 | -2.21 | 2.70E-02 | 0.14 | control |
| miR_628_3p  | 3479438 | CHFR     | -0.61 | 0.28 | -2.21 | 2.70E-02 | 0.14 | case    |
| miR_197_3p  | 2413685 | SSBP3    | -0.4  | 0.18 | -2.21 | 2.70E-02 | 0.14 | case    |
| miR_146a_5p | 3192609 | GFI1B    | -0.73 | 0.33 | -2.21 | 2.70E-02 | 0.14 | control |
| miR_221_3p  | 2545811 | PPM1G    | -0.69 | 0.31 | -2.21 | 2.70E-02 | 0.14 | case    |
| miR_590_5p  | 2768468 | FRYL     | -0.2  | 0.09 | -2.21 | 2.70E-02 | 0.14 | control |
| miR_146a_5p | 2591421 | TFPI     | -0.58 | 0.26 | -2.21 | 2.70E-02 | 0.14 | control |
| miR_197_3p  | 2655476 | AP2M1    | -0.59 | 0.27 | -2.21 | 2.70E-02 | 0.14 | case    |
| miR_181a_5p | 2363084 | NCSTN    | -0.67 | 0.3  | -2.21 | 2.70E-02 | 0.14 | case    |
| miR_106b_5p | 2958670 | RAB23    | -0.4  | 0.18 | -2.21 | 2.70E-02 | 0.14 | control |
| miR_766_3p  | 2429371 | TSPAN2   | 0.33  | 0.15 | 2.21  | 2.70E-02 | 0.14 | case    |
| miR_25_5p   | 3765580 | BRIP1    | -0.43 | 0.2  | -2.21 | 2.70E-02 | 0.14 | control |
| miR_1275    | 2413180 | MAGOH    | 0.43  | 0.2  | 2.21  | 2.70E-02 | 0.14 | case    |
| miR_106a_5p | 2594812 | TRAK2    | -0.28 | 0.13 | -2.21 | 2.70E-02 | 0.14 | control |
| miR_590_5p  | 2318637 | VAMP3    | -0.33 | 0.15 | -2.21 | 2.70E-02 | 0.14 | control |
| miR_155_5p  | 3868283 | VRK3     | -0.65 | 0.29 | -2.21 | 2.70E-02 | 0.14 | case    |
| miR_197_3p  | 2501204 | IL1RN    | -0.96 | 0.43 | -2.21 | 2.70E-02 | 0.14 | control |
| miR_210     | 3835935 | CLPTM1   | -0.61 | 0.27 | -2.21 | 2.70E-02 | 0.14 | case    |
| miR_106a_5p | 2997376 | ANLN     | -0.69 | 0.31 | -2.21 | 2.70E-02 | 0.14 | control |
| miR_197_3p  | 3332729 | CD5      | -0.65 | 0.3  | -2.21 | 2.70E-02 | 0.14 | case    |
| miR_15b_3p  | 3832978 | ZFP36    | -0.51 | 0.23 | -2.21 | 2.70E-02 | 0.14 | control |
| miR_210     | 3381607 | RAB6A    | -0.51 | 0.23 | -2.21 | 2.70E-02 | 0.14 | control |
| miR_155_5p  | 3610804 | IGF1R    | -0.39 | 0.18 | -2.21 | 2.70E-02 | 0.14 | case    |
| miR_24_2_5p | 3843677 | NAG18    | 0.28  | 0.13 | 2.21  | 2.70E-02 | 0.14 | control |
| miR_15b_3p  | 3883971 | C20orf24 | -0.56 | 0.25 | -2.21 | 2.70E-02 | 0.14 | control |
| miR_144_5p  | 3372253 | CELF1    | -0.39 | 0.18 | -2.21 | 2.70E-02 | 0.14 | case    |
| miR_195_5p  | 2448232 | TPR      | -0.29 | 0.13 | -2.21 | 2.70E-02 | 0.14 | control |
| miR_20a_5p  | 2775858 | LIN54    | -0.62 | 0.28 | -2.21 | 2.70E-02 | 0.14 | control |
| miR_106a_5p | 3763656 | TRIM25   | -0.45 | 0.2  | -2.21 | 2.70E-02 | 0.14 | case    |
| miR_340_5p  | 3929038 | C21orf45 | -1.49 | 0.67 | -2.21 | 2.70E-02 | 0.14 | control |
| miR_93_5p   | 2726323 | SLAIN2   | -0.62 | 0.28 | -2.21 | 2.70E-02 | 0.14 | control |
| miR_20b_5p  | 2437736 | RIT1     | -0.55 | 0.25 | -2.21 | 2.70E-02 | 0.14 | control |
| miR_106a_5p | 2713555 | KIAA0226 | -0.71 | 0.32 | -2.21 | 2.70E-02 | 0.14 | case    |
| miR_197_3p  | 3293840 | SPOCK2   | -1    | 0.45 | -2.21 | 2.70E-02 | 0.14 | case    |
| miR_20a_5p  | 2495446 | INPP4A   | -0.61 | 0.27 | -2.2  | 2.70E-02 | 0.14 | case    |

|             |         |           |       |      |       |          |      |         |
|-------------|---------|-----------|-------|------|-------|----------|------|---------|
| miR_181a_5p | 3569814 | ACTN1     | -0.49 | 0.22 | -2.2  | 2.70E-02 | 0.14 | case    |
| miR_192_5p  | 3394092 | SLC37A4   | 1.07  | 0.49 | 2.2   | 2.70E-02 | 0.14 | case    |
| miR_548d_3p | 3306984 | GPAM      | -1.66 | 0.75 | -2.2  | 2.70E-02 | 0.14 | case    |
| let_7b_5p   | 2766532 | UBE2K     | -0.54 | 0.25 | -2.2  | 2.80E-02 | 0.14 | control |
| miR_210     | 3862785 | C19orf54  | -0.81 | 0.37 | -2.2  | 2.80E-02 | 0.14 | case    |
| miR_210     | 3772581 | USP36     | -0.64 | 0.29 | -2.2  | 2.80E-02 | 0.14 | case    |
| miR_18a_3p  | 3740264 | INPP5K    | -0.67 | 0.3  | -2.2  | 2.80E-02 | 0.14 | control |
| miR_340_5p  | 3527745 | METT11D1  | -1.09 | 0.5  | -2.2  | 2.80E-02 | 0.14 | control |
| miR_1275    | 3986230 | CXorf57   | 0.55  | 0.25 | 2.2   | 2.80E-02 | 0.14 | case    |
| miR_106a_5p | 2958670 | RAB23     | -0.39 | 0.18 | -2.2  | 2.80E-02 | 0.14 | control |
| miR_941     | 3168508 | MELK      | -0.63 | 0.29 | -2.2  | 2.80E-02 | 0.14 | control |
| miR_495     | 3970130 | SYAP1     | 0.65  | 0.3  | 2.2   | 2.80E-02 | 0.14 | control |
| miR_29c_3p  | 2353988 | FAM46C    | -0.43 | 0.2  | -2.2  | 2.80E-02 | 0.14 | control |
| miR_1275    | 3428088 | ACTR6     | 0.33  | 0.15 | 2.2   | 2.80E-02 | 0.14 | case    |
| miR_20b_5p  | 2732942 | BMP2K     | -0.45 | 0.21 | -2.2  | 2.80E-02 | 0.14 | control |
| miR_181a_5p | 3431892 | SH2B3     | -1.1  | 0.5  | -2.2  | 2.80E-02 | 0.14 | case    |
| miR_1254    | 3131741 | RAB11FIP1 | -0.69 | 0.31 | -2.2  | 2.80E-02 | 0.14 | case    |
| miR_7_5p    | 3402571 | NCAPD2    | -0.39 | 0.18 | -2.2  | 2.80E-02 | 0.14 | case    |
| miR_103a_3p | 2447454 | ARPC5     | -1.46 | 0.66 | -2.2  | 2.80E-02 | 0.14 | control |
| miR_210     | 3190558 | SPTAN1    | -0.34 | 0.15 | -2.2  | 2.80E-02 | 0.14 | case    |
| miR_20b_5p  | 2591421 | TFPI      | -0.5  | 0.23 | -2.2  | 2.80E-02 | 0.14 | control |
| miR_106a_5p | 2662491 | TMEM111   | -0.3  | 0.14 | -2.2  | 2.80E-02 | 0.14 | control |
| miR_744_5p  | 3464912 | POC1B     | -0.46 | 0.21 | -2.2  | 2.80E-02 | 0.14 | control |
| miR_1275    | 2566021 | ACTR1B    | -0.59 | 0.27 | -2.2  | 2.80E-02 | 0.14 | control |
| miR_16_1_3p | 3430959 | ACACB     | -1.05 | 0.48 | -2.2  | 2.80E-02 | 0.14 | case    |
| let_7c      | 2450345 | KIF14     | -0.47 | 0.21 | -2.2  | 2.80E-02 | 0.14 | control |
| miR_106b_5p | 3159132 | COMMD5    | 1.1   | 0.5  | 2.2   | 2.80E-02 | 0.14 | control |
| miR_29c_3p  | 3090053 | SLC25A37  | -0.29 | 0.13 | -2.2  | 2.80E-02 | 0.14 | control |
| miR_590_5p  | 2664452 | ANKRD28   | -0.23 | 0.11 | -2.2  | 2.80E-02 | 0.14 | control |
| miR_590_5p  | 3212189 | GKAP1     | -0.15 | 0.07 | -2.19 | 2.80E-02 | 0.14 | control |
| miR_221_3p  | 2361731 | PRCC      | -0.79 | 0.36 | -2.19 | 2.80E-02 | 0.14 | case    |
| miR_155_5p  | 2844410 | MAML1     | -1.13 | 0.52 | -2.19 | 2.80E-02 | 0.14 | case    |
| miR_193a_5p | 2893562 | RREB1     | -1.07 | 0.49 | -2.19 | 2.80E-02 | 0.14 | case    |
| miR_197_3p  | 3436544 | BRI3BP    | -0.98 | 0.44 | -2.19 | 2.80E-02 | 0.14 | case    |
| miR_17_5p   | 3477967 |           | -0.38 | 0.17 | -2.19 | 2.80E-02 | 0.14 | case    |
| miR_629_5p  | 2887048 | STK10     | -0.67 | 0.31 | -2.19 | 2.80E-02 | 0.15 | case    |
| miR_505_5p  | 2562821 | VPS24     | 0.53  | 0.24 | 2.19  | 2.80E-02 | 0.15 | case    |
| let_7b_5p   | 3325839 | TCP11L1   | 0.41  | 0.18 | 2.19  | 2.80E-02 | 0.15 | control |

|             |         |          |       |      |       |          |      |         |
|-------------|---------|----------|-------|------|-------|----------|------|---------|
| miR_222_3p  | 2505529 | PTPN18   | -0.63 | 0.29 | -2.19 | 2.80E-02 | 0.15 | case    |
| miR_301a_3p | 2905512 | FTSJD2   | -0.42 | 0.19 | -2.19 | 2.90E-02 | 0.15 | case    |
| miR_17_5p   | 3980758 | MED12    | -0.46 | 0.21 | -2.19 | 2.90E-02 | 0.15 | case    |
| miR_106b_5p | 2406420 | CLSPN    | -0.54 | 0.25 | -2.19 | 2.90E-02 | 0.15 | control |
| miR_93_5p   | 2609960 | TTLL3    | -0.81 | 0.37 | -2.19 | 2.90E-02 | 0.15 | case    |
| miR_93_5p   | 3075778 | HIPK2    | -0.63 | 0.29 | -2.19 | 2.90E-02 | 0.15 | case    |
| miR_17_5p   | 3965314 | BRD1     | -0.88 | 0.4  | -2.19 | 2.90E-02 | 0.15 | case    |
| miR_744_5p  | 3742727 | DHX33    | -1.09 | 0.5  | -2.19 | 2.90E-02 | 0.15 | case    |
| miR_197_3p  | 3720636 | PSMD3    | -1.02 | 0.47 | -2.19 | 2.90E-02 | 0.15 | case    |
| miR_1275    | 2972759 | HDHC2    | 0.38  | 0.18 | 2.19  | 2.90E-02 | 0.15 | case    |
| miR_629_3p  | 3645836 | ZNF75A   | 0.54  | 0.25 | 2.19  | 2.90E-02 | 0.15 | control |
| miR_222_3p  | 3329724 | MADD     | -0.41 | 0.19 | -2.19 | 2.90E-02 | 0.15 | case    |
| miR_374a_5p | 3394092 | SLC37A4  | 0.6   | 0.28 | 2.18  | 2.90E-02 | 0.15 | case    |
| miR_660_5p  | 3090053 | SLC25A37 | -0.35 | 0.16 | -2.18 | 2.90E-02 | 0.15 | control |
| miR_590_5p  | 3697632 | ZNF23    | -0.33 | 0.15 | -2.18 | 2.90E-02 | 0.15 | control |
| miR_130a_3p | 2793401 | MFAP3L   | -0.47 | 0.22 | -2.18 | 2.90E-02 | 0.15 | control |
| let_7b_5p   | 3843419 | ZNF211   | -0.35 | 0.16 | -2.18 | 2.90E-02 | 0.15 | case    |
| miR_20a_5p  | 2587618 | OLA1     | -0.52 | 0.24 | -2.18 | 2.90E-02 | 0.15 | control |
| miR_1275    | 3835544 | ZNF227   | 0.59  | 0.27 | 2.18  | 2.90E-02 | 0.15 | case    |
| miR_16_1_3p | 3723071 | DBF4B    | -1.2  | 0.55 | -2.18 | 2.90E-02 | 0.15 | case    |
| miR_103a_3p | 2958670 | RAB23    | -0.44 | 0.2  | -2.18 | 2.90E-02 | 0.15 | control |
| miR_181a_5p | 2954025 | TRERF1   | -1.15 | 0.53 | -2.18 | 2.90E-02 | 0.15 | case    |
| miR_7_5p    | 3217123 | TRIM14   | -0.56 | 0.26 | -2.18 | 2.90E-02 | 0.15 | case    |
| miR_301a_3p | 2830742 | KDM3B    | -0.43 | 0.2  | -2.18 | 2.90E-02 | 0.15 | case    |
| miR_1275    | 2339740 | EFCAB7   | 0.52  | 0.24 | 2.18  | 2.90E-02 | 0.15 | case    |
| miR_106a_5p | 2486178 | MEIS1    | -0.57 | 0.26 | -2.18 | 2.90E-02 | 0.15 | control |
| miR_146a_5p | 2726323 | SLAIN2   | -0.67 | 0.31 | -2.18 | 2.90E-02 | 0.15 | control |
| miR_502_3p  | 2858592 | DEPDC1B  | -0.67 | 0.31 | -2.18 | 2.90E-02 | 0.15 | control |
| miR_345_5p  | 2953570 | TREM1    | -0.35 | 0.16 | -2.18 | 2.90E-02 | 0.15 | control |
| miR_629_3p  | 3848984 | PRAM1    | -0.66 | 0.3  | -2.18 | 2.90E-02 | 0.15 | case    |
| let_7d_3p   | 3563861 | CDKL1    | 0.71  | 0.33 | 2.18  | 2.90E-02 | 0.15 | control |
| miR_106a_5p | 3623865 | SPPL2A   | 0.51  | 0.23 | 2.18  | 2.90E-02 | 0.15 | case    |
| miR_24_2_5p | 3712363 | MPRIP    | -0.41 | 0.19 | -2.18 | 2.90E-02 | 0.15 | case    |
| miR_197_3p  | 3861978 | PAF1     | -0.74 | 0.34 | -2.18 | 2.90E-02 | 0.15 | case    |
| miR_210     | 3591674 | C15orf63 | -0.55 | 0.25 | -2.18 | 2.90E-02 | 0.15 | case    |
| let_7d_3p   | 3182781 | SMC2     | 0.35  | 0.16 | 2.18  | 2.90E-02 | 0.15 | control |
| miR_590_5p  | 2544238 | ITSN2    | -0.3  | 0.14 | -2.18 | 2.90E-02 | 0.15 | control |
| miR_16_1_3p | 3712363 | MPRIP    | -0.47 | 0.22 | -2.18 | 2.90E-02 | 0.15 | case    |

|             |         |              |       |      |       |          |      |         |
|-------------|---------|--------------|-------|------|-------|----------|------|---------|
| miR_199a_3p | 3816414 | LOC100129831 | 0.5   | 0.23 | 2.18  | 2.90E-02 | 0.15 | control |
| miR_425_3p  | 2887309 | DUSP1        | -0.42 | 0.19 | -2.18 | 2.90E-02 | 0.15 | control |
| miR_17_5p   | 3821095 | TSPAN16      | -0.33 | 0.15 | -2.18 | 2.90E-02 | 0.15 | case    |
| miR_106a_5p | 3563395 | POLE2        | -0.37 | 0.17 | -2.18 | 3.00E-02 | 0.15 | control |
| miR_27a_5p  | 3646164 | DNAJA3       | -0.84 | 0.39 | -2.18 | 3.00E-02 | 0.15 | case    |
| miR_15b_3p  | 3457160 | CD63         | -0.68 | 0.31 | -2.18 | 3.00E-02 | 0.15 | control |
| miR_1275    | 3667890 | HPR          | -0.45 | 0.21 | -2.18 | 3.00E-02 | 0.15 | case    |
| miR_24_2_5p | 3659966 | ADCY7        | -0.99 | 0.46 | -2.18 | 3.00E-02 | 0.15 | case    |
| miR_210     | 3316447 | AP2A2        | -0.66 | 0.31 | -2.18 | 3.00E-02 | 0.15 | case    |
| miR_320a    | 2793401 | MFAP3L       | -0.6  | 0.28 | -2.18 | 3.00E-02 | 0.15 | control |
| miR_152     | 2320472 | CLCN6        | -0.73 | 0.34 | -2.18 | 3.00E-02 | 0.15 | case    |
| miR_197_3p  | 3746040 | ELAC2        | -1.33 | 0.61 | -2.17 | 3.00E-02 | 0.15 | case    |
| miR_144_5p  | 3942179 | MTMR3        | -0.31 | 0.14 | -2.17 | 3.00E-02 | 0.15 | case    |
| let_7c      | 3632152 | HEXA         | 0.61  | 0.28 | 2.17  | 3.00E-02 | 0.15 | control |
| miR_17_5p   | 3334025 | MARK2        | -0.59 | 0.27 | -2.17 | 3.00E-02 | 0.15 | case    |
| miR_103a_3p | 2995254 | C7orf41      | -0.52 | 0.24 | -2.17 | 3.00E-02 | 0.15 | control |
| miR_505_5p  | 2479640 | PPM1B        | 0.64  | 0.3  | 2.17  | 3.00E-02 | 0.15 | case    |
| miR_654_5p  | 3246888 | PRKG1        | -0.75 | 0.35 | -2.17 | 3.00E-02 | 0.15 | control |
| let_7g_5p   | 2963784 | AKIRIN2      | -0.71 | 0.33 | -2.17 | 3.00E-02 | 0.15 | control |
| miR_590_5p  | 3065480 | NAPEPLD      | -0.25 | 0.12 | -2.17 | 3.00E-02 | 0.15 | control |
| miR_210     | 3801411 | NPC1         | -0.47 | 0.22 | -2.17 | 3.00E-02 | 0.15 | case    |
| miR_93_5p   | 2503200 | RALB         | -0.44 | 0.2  | -2.17 | 3.00E-02 | 0.15 | control |
| miR_127_3p  | 2365933 | LOC100128751 | 0.36  | 0.17 | 2.17  | 3.00E-02 | 0.15 | control |
| miR_210     | 3203482 | BAG1         | -0.35 | 0.16 | -2.17 | 3.00E-02 | 0.15 | control |
| miR_454_3p  | 2620538 | LARS2        | -0.59 | 0.27 | -2.17 | 3.00E-02 | 0.15 | case    |
| miR_20b_5p  | 3074640 | LUZP6        | -0.7  | 0.32 | -2.17 | 3.00E-02 | 0.15 | control |
| miR_28_5p   | 3066818 | NAMPT        | -0.65 | 0.3  | -2.17 | 3.00E-02 | 0.15 | control |
| miR_766_3p  | 3012978 | GNG11        | 0.24  | 0.11 | 2.17  | 3.00E-02 | 0.15 | case    |
| miR_16_1_3p | 3937183 | DGCR8        | -0.73 | 0.33 | -2.17 | 3.00E-02 | 0.15 | case    |
| miR_27a_3p  | 2324416 | ALPL         | -0.41 | 0.19 | -2.17 | 3.00E-02 | 0.15 | control |
| miR_197_3p  | 3250278 | HK1          | -0.66 | 0.31 | -2.17 | 3.00E-02 | 0.15 | case    |
| miR_106b_5p | 2587618 | OLA1         | -0.58 | 0.27 | -2.17 | 3.00E-02 | 0.15 | control |
| miR_197_3p  | 3332663 | CD6          | -1    | 0.46 | -2.17 | 3.00E-02 | 0.15 | case    |
| let_7b_5p   | 2715634 | ADD1         | -0.48 | 0.22 | -2.17 | 3.00E-02 | 0.15 | case    |
| miR_454_3p  | 3820758 | DNM2         | -0.43 | 0.2  | -2.17 | 3.00E-02 | 0.15 | case    |
| miR_1282    | 2323743 | RPS14        | -1.46 | 0.67 | -2.17 | 3.00E-02 | 0.15 | control |
| miR_590_5p  | 2345196 | HS2ST1       | -0.33 | 0.15 | -2.17 | 3.00E-02 | 0.15 | control |
| miR_17_5p   | 2775858 | LIN54        | -0.67 | 0.31 | -2.17 | 3.00E-02 | 0.15 | control |

|             |         |           |       |      |       |          |      |         |
|-------------|---------|-----------|-------|------|-------|----------|------|---------|
| miR_197_3p  | 2640916 | ABTB1     | -0.74 | 0.34 | -2.17 | 3.00E-02 | 0.15 | control |
| miR_106a_5p | 2449559 | ASPM      | -0.58 | 0.27 | -2.17 | 3.00E-02 | 0.15 | control |
| miR_148a_3p | 3101893 | CSPP1     | -0.27 | 0.12 | -2.17 | 3.00E-02 | 0.15 | control |
| miR_30c_5p  | 3088544 | ATP6V1B2  | -1.28 | 0.59 | -2.17 | 3.00E-02 | 0.15 | control |
| miR_1227    | 2773358 | PPBP      | 0.24  | 0.11 | 2.17  | 3.00E-02 | 0.15 | case    |
| miR_197_3p  | 3874438 | CDC25B    | -0.98 | 0.45 | -2.17 | 3.00E-02 | 0.15 | case    |
| miR_181a_5p | 3720739 | CASC3     | -0.66 | 0.3  | -2.17 | 3.00E-02 | 0.15 | case    |
| miR_330_3p  | 2881860 | CCDC69    | -0.77 | 0.36 | -2.16 | 3.00E-02 | 0.15 | case    |
| miR_138_5p  | 3747199 | CENPV     | -0.88 | 0.41 | -2.16 | 3.00E-02 | 0.15 | case    |
| miR_106a_5p | 3037193 | EIF2AK1   | -0.29 | 0.13 | -2.16 | 3.00E-02 | 0.15 | control |
| miR_197_3p  | 3226369 | CIZ1      | -1.05 | 0.48 | -2.16 | 3.00E-02 | 0.15 | case    |
| miR_301a_3p | 3907830 | ELMO2     | -0.43 | 0.2  | -2.16 | 3.00E-02 | 0.15 | case    |
| miR_106a_5p | 3192609 | GFI1B     | -0.59 | 0.27 | -2.16 | 3.10E-02 | 0.15 | control |
| miR_222_3p  | 3015941 | SRRT      | -0.51 | 0.23 | -2.16 | 3.10E-02 | 0.15 | case    |
| miR_330_3p  | 3114618 | RNF139    | 0.68  | 0.31 | 2.16  | 3.10E-02 | 0.15 | case    |
| miR_221_3p  | 2406420 | CLSPN     | -0.57 | 0.26 | -2.16 | 3.10E-02 | 0.15 | control |
| miR_155_5p  | 3381063 | CLPB      | -1.01 | 0.47 | -2.16 | 3.10E-02 | 0.15 | case    |
| miR_628_3p  | 3203962 | KIF24     | -0.35 | 0.16 | -2.16 | 3.10E-02 | 0.15 | control |
| miR_106a_5p | 3131741 | RAB11FIP1 | -0.48 | 0.22 | -2.16 | 3.10E-02 | 0.15 | case    |
| miR_197_3p  | 3846538 | EEF2      | -0.74 | 0.34 | -2.16 | 3.10E-02 | 0.15 | case    |
| miR_629_3p  | 3572235 | MLH3      | 0.68  | 0.31 | 2.16  | 3.10E-02 | 0.15 | case    |
| miR_20b_5p  | 2726323 | SLAIN2    | -0.55 | 0.25 | -2.16 | 3.10E-02 | 0.15 | control |
| miR_331_5p  | 3166477 | ACO1      | -2.44 | 1.13 | -2.16 | 3.10E-02 | 0.15 | case    |
| miR_210     | 3702293 | MBTPS1    | -0.63 | 0.29 | -2.16 | 3.10E-02 | 0.15 | case    |
| miR_19b_3p  | 2801608 | 6-Mar     | -1.05 | 0.49 | -2.16 | 3.10E-02 | 0.15 | control |
| miR_106a_5p | 2881860 | CCDC69    | -0.53 | 0.24 | -2.16 | 3.10E-02 | 0.15 | case    |
| miR_20a_5p  | 2893562 | RREB1     | -0.89 | 0.41 | -2.16 | 3.10E-02 | 0.15 | case    |
| miR_301a_3p | 3820921 | SMARCA4   | -0.45 | 0.21 | -2.16 | 3.10E-02 | 0.15 | case    |
| miR_222_3p  | 3382216 | ARRB1     | -0.36 | 0.17 | -2.16 | 3.10E-02 | 0.15 | case    |
| miR_590_5p  | 2854737 | PRKAA1    | -0.26 | 0.12 | -2.16 | 3.10E-02 | 0.15 | control |
| miR_210     | 3677752 | TRAP1     | -0.56 | 0.26 | -2.16 | 3.10E-02 | 0.15 | case    |
| miR_942     | 3892452 | LSM14B    | 0.49  | 0.23 | 2.16  | 3.10E-02 | 0.15 | case    |
| miR_766_3p  | 2906591 | APOBEC2   | 0.68  | 0.31 | 2.16  | 3.10E-02 | 0.15 | case    |
| miR_17_5p   | 3623865 | SPPL2A    | 0.54  | 0.25 | 2.16  | 3.10E-02 | 0.15 | case    |
| miR_20b_5p  | 2910477 | FBXO9     | -0.34 | 0.16 | -2.16 | 3.10E-02 | 0.15 | control |
| miR_301a_3p | 2360083 | UBAP2L    | -0.5  | 0.23 | -2.16 | 3.10E-02 | 0.15 | case    |
| miR_502_3p  | 3090053 | SLC25A37  | -0.36 | 0.16 | -2.16 | 3.10E-02 | 0.15 | control |
| miR_1275    | 2866045 | TMEM161B  | 0.3   | 0.14 | 2.16  | 3.10E-02 | 0.15 | case    |

|              |         |           |       |      |       |          |      |         |
|--------------|---------|-----------|-------|------|-------|----------|------|---------|
| miR_181a_5p  | 2495446 | INPP4A    | -0.76 | 0.35 | -2.16 | 3.10E-02 | 0.15 | case    |
| miR_106a_5p  | 2327677 | EPB41     | -0.34 | 0.16 | -2.15 | 3.10E-02 | 0.15 | control |
| miR_29b_2_5p | 3474885 | CAMKK2    | -0.59 | 0.27 | -2.15 | 3.10E-02 | 0.15 | case    |
| miR_423_5p   | 3685329 | PALB2     | 0.81  | 0.38 | 2.15  | 3.10E-02 | 0.15 | control |
| miR_152      | 3302360 | MMS19     | -0.91 | 0.42 | -2.15 | 3.10E-02 | 0.15 | case    |
| miR_29b_2_5p | 3294142 | PLA2G12B  | 0.67  | 0.31 | 2.15  | 3.10E-02 | 0.15 | control |
| miR_106b_5p  | 2789957 | FBXW7     | -0.46 | 0.21 | -2.15 | 3.10E-02 | 0.15 | control |
| miR_103a_3p  | 2353988 | FAM46C    | -0.53 | 0.25 | -2.15 | 3.10E-02 | 0.15 | control |
| miR_148a_3p  | 2743085 | LARP1B    | -0.37 | 0.17 | -2.15 | 3.10E-02 | 0.15 | control |
| miR_28_5p    | 2437736 | RIT1      | -0.73 | 0.34 | -2.15 | 3.10E-02 | 0.15 | control |
| miR_7_5p     | 3432030 | ACAD10    | -0.57 | 0.27 | -2.15 | 3.10E-02 | 0.15 | case    |
| miR_197_3p   | 3571436 | HEATR4    | -1.61 | 0.75 | -2.15 | 3.10E-02 | 0.15 | case    |
| miR_20b_5p   | 2353988 | FAM46C    | -0.44 | 0.21 | -2.15 | 3.10E-02 | 0.15 | control |
| miR_181a_5p  | 3018375 | PRKAR2B   | -0.33 | 0.15 | -2.15 | 3.20E-02 | 0.15 | control |
| miR_16_1_3p  | 2662020 | RAD18     | -0.77 | 0.36 | -2.15 | 3.20E-02 | 0.15 | control |
| miR_17_5p    | 2437801 | ARHGEF2   | -0.65 | 0.3  | -2.15 | 3.20E-02 | 0.15 | case    |
| miR_301a_3p  | 2328713 | TXLNA     | -0.66 | 0.31 | -2.15 | 3.20E-02 | 0.15 | case    |
| let_7d_3p    | 3408966 | FGFR1OP2  | 0.22  | 0.1  | 2.15  | 3.20E-02 | 0.15 | control |
| miR_128      | 2904877 | MAPK14    | -0.66 | 0.31 | -2.15 | 3.20E-02 | 0.15 | control |
| let_7d_5p    | 2633256 | ST3GAL6   | -0.54 | 0.25 | -2.15 | 3.20E-02 | 0.15 | control |
| miR_15b_3p   | 2505957 | PLEKHB2   | -0.53 | 0.24 | -2.15 | 3.20E-02 | 0.15 | control |
| let_7b_5p    | 3267314 | BAG3      | -0.62 | 0.29 | -2.15 | 3.20E-02 | 0.15 | case    |
| miR_181a_5p  | 2948713 | RDBP      | -0.67 | 0.31 | -2.15 | 3.20E-02 | 0.15 | case    |
| miR_181a_5p  | 2931970 | MYCT1     | -0.39 | 0.18 | -2.15 | 3.20E-02 | 0.15 | control |
| miR_181a_5p  | 2504328 | GYPC      | -0.4  | 0.19 | -2.15 | 3.20E-02 | 0.15 | control |
| miR_1275     | 3146661 | ANKRD46   | 0.48  | 0.22 | 2.15  | 3.20E-02 | 0.15 | case    |
| miR_1275     | 3090209 | ADAM28    | 0.31  | 0.15 | 2.15  | 3.20E-02 | 0.15 | case    |
| let_7b_5p    | 2450345 | KIF14     | -0.38 | 0.18 | -2.15 | 3.20E-02 | 0.15 | control |
| miR_340_5p   | 3892660 | RPS21     | -1.04 | 0.49 | -2.15 | 3.20E-02 | 0.15 | control |
| miR_629_3p   | 3221543 | CDC26     | 0.46  | 0.22 | 2.14  | 3.20E-02 | 0.15 | case    |
| miR_1275     | 2953435 | C6orf130  | 0.34  | 0.16 | 2.14  | 3.20E-02 | 0.15 | case    |
| miR_222_3p   | 3819880 | ZNF317    | -0.53 | 0.25 | -2.14 | 3.20E-02 | 0.15 | case    |
| miR_146a_5p  | 2958670 | RAB23     | -0.43 | 0.2  | -2.14 | 3.20E-02 | 0.15 | control |
| miR_941      | 2899223 | HIST1H2AE | -0.43 | 0.2  | -2.14 | 3.20E-02 | 0.15 | control |
| let_7c       | 3907934 | ZNF334    | -0.9  | 0.42 | -2.14 | 3.20E-02 | 0.15 | control |
| miR_210      | 2526759 | ATIC      | -0.37 | 0.17 | -2.14 | 3.20E-02 | 0.15 | case    |
| miR_222_3p   | 2396537 | MTOR      | -0.44 | 0.21 | -2.14 | 3.20E-02 | 0.15 | case    |
| miR_590_5p   | 3716893 | ATAD5     | -0.2  | 0.09 | -2.14 | 3.20E-02 | 0.15 | control |



|             |         |           |       |      |       |          |      |         |
|-------------|---------|-----------|-------|------|-------|----------|------|---------|
| miR_532_5p  | 3444252 | CSDA      | -0.33 | 0.15 | -2.14 | 3.20E-02 | 0.15 | control |
| miR_197_3p  | 3315231 | ECHS1     | -0.88 | 0.41 | -2.14 | 3.20E-02 | 0.15 | case    |
| miR_93_5p   | 2406420 | CLSPN     | -0.55 | 0.26 | -2.14 | 3.20E-02 | 0.15 | control |
| miR_106b_5p | 2485257 | UGP2      | -0.38 | 0.18 | -2.14 | 3.20E-02 | 0.15 | control |
| miR_301a_3p | 2324743 | ZBTB40    | -0.56 | 0.26 | -2.14 | 3.20E-02 | 0.15 | case    |
| miR_941     | 3414885 | SLC4A8    | 0.96  | 0.45 | 2.14  | 3.20E-02 | 0.15 | control |
| miR_18a_3p  | 2989050 | RAC1      | -0.42 | 0.19 | -2.14 | 3.20E-02 | 0.15 | control |
| miR_454_3p  | 3961932 | TOB2      | -0.61 | 0.29 | -2.14 | 3.20E-02 | 0.15 | case    |
| miR_301a_3p | 3372253 | CELF1     | -0.6  | 0.28 | -2.14 | 3.20E-02 | 0.15 | case    |
| miR_144_5p  | 3740171 | CRK       | -0.31 | 0.15 | -2.14 | 3.20E-02 | 0.15 | case    |
| miR_132_3p  | 2451155 | PTPN7     | 0.98  | 0.46 | 2.14  | 3.30E-02 | 0.15 | control |
| miR_1275    | 2342624 | RABGGTB   | 0.31  | 0.15 | 2.14  | 3.30E-02 | 0.15 | case    |
| miR_181a_5p | 2438657 | ARHGEF11  | -0.81 | 0.38 | -2.14 | 3.30E-02 | 0.15 | case    |
| miR_301a_3p | 3382216 | ARRB1     | -0.37 | 0.17 | -2.14 | 3.30E-02 | 0.15 | case    |
| let_7c      | 4017281 | NUP62CL   | -0.44 | 0.21 | -2.14 | 3.30E-02 | 0.15 | control |
| miR_93_5p   | 2623180 | RAD54L2   | -0.54 | 0.25 | -2.14 | 3.30E-02 | 0.15 | case    |
| miR_320a    | 3806905 | SMAD2     | 0.51  | 0.24 | 2.14  | 3.30E-02 | 0.15 | case    |
| miR_1275    | 3343202 | EED       | 0.5   | 0.24 | 2.14  | 3.30E-02 | 0.15 | case    |
| miR_210     | 3786868 | SLC14A1   | -0.19 | 0.09 | -2.14 | 3.30E-02 | 0.15 | control |
| miR_590_5p  | 2556215 | VPS54     | -0.25 | 0.12 | -2.13 | 3.30E-02 | 0.15 | control |
| miR_301a_3p | 3825713 | GATAD2A   | -0.59 | 0.28 | -2.13 | 3.30E-02 | 0.15 | case    |
| miR_1275    | 3059942 | KIAA1324L | 0.47  | 0.22 | 2.13  | 3.30E-02 | 0.15 | case    |
| miR_155_5p  | 2899110 | HFE       | -0.93 | 0.43 | -2.13 | 3.30E-02 | 0.15 | case    |
| miR_324_3p  | 3315231 | ECHS1     | -0.74 | 0.35 | -2.13 | 3.30E-02 | 0.15 | case    |
| miR_324_3p  | 2545750 | EIF2B4    | -0.91 | 0.43 | -2.13 | 3.30E-02 | 0.15 | case    |
| miR_629_5p  | 3442205 | ZNF384    | -0.88 | 0.41 | -2.13 | 3.30E-02 | 0.15 | case    |
| miR_301a_3p | 2565410 | KIAA1310  | -0.7  | 0.33 | -2.13 | 3.30E-02 | 0.15 | case    |
| miR_181a_5p | 3737874 | BAHCC1    | -0.43 | 0.2  | -2.13 | 3.30E-02 | 0.15 | case    |
| miR_301a_3p | 3063646 | ZNF3      | -0.55 | 0.26 | -2.13 | 3.30E-02 | 0.15 | case    |
| miR_126_3p  | 2779992 | UBE2D3    | -0.75 | 0.35 | -2.13 | 3.30E-02 | 0.15 | control |
| miR_132_3p  | 3669059 | GABARAPL2 | -0.55 | 0.26 | -2.13 | 3.30E-02 | 0.15 | control |
| miR_885_5p  | 3840327 | ZNF808    | -0.48 | 0.22 | -2.13 | 3.30E-02 | 0.15 | control |
| miR_181a_5p | 2411228 | STIL      | -0.45 | 0.21 | -2.13 | 3.30E-02 | 0.15 | control |
| miR_151a_5p | 2752725 | NEIL3     | -0.39 | 0.18 | -2.13 | 3.30E-02 | 0.15 | control |
| miR_301a_3p | 2619120 | TRAK1     | -0.56 | 0.26 | -2.13 | 3.30E-02 | 0.15 | case    |
| miR_590_5p  | 2832081 | ZMAT2     | -0.18 | 0.09 | -2.13 | 3.30E-02 | 0.15 | control |
| let_7c      | 3666601 | SNTB2     | 0.64  | 0.3  | 2.13  | 3.30E-02 | 0.15 | control |
| miR_132_3p  | 3844855 | C19orf22  | -0.48 | 0.22 | -2.13 | 3.30E-02 | 0.15 | control |

|              |         |            |       |      |       |          |      |         |
|--------------|---------|------------|-------|------|-------|----------|------|---------|
| miR_210      | 3820921 | SMARCA4    | -0.44 | 0.2  | -2.13 | 3.30E-02 | 0.15 | case    |
| miR_27a_5p   | 3003193 | CCT6A      | 0.58  | 0.27 | 2.13  | 3.30E-02 | 0.15 | case    |
| miR_106b_5p  | 2682436 | RYBP       | -0.47 | 0.22 | -2.13 | 3.30E-02 | 0.15 | control |
| miR_181a_5p  | 3702547 | COTL1      | -0.59 | 0.28 | -2.13 | 3.30E-02 | 0.15 | case    |
| miR_181a_5p  | 3563395 | POLE2      | -0.39 | 0.18 | -2.13 | 3.30E-02 | 0.15 | control |
| miR_423_5p   | 3904527 | NDRG3      | -0.72 | 0.34 | -2.13 | 3.30E-02 | 0.15 | case    |
| miR_628_3p   | 3952637 | HIRA       | -0.73 | 0.34 | -2.13 | 3.30E-02 | 0.15 | case    |
| miR_222_3p   | 2394841 | DNAJC11    | -0.41 | 0.19 | -2.13 | 3.30E-02 | 0.15 | case    |
| miR_103a_3p  | 3914786 | ABCC13     | -0.49 | 0.23 | -2.13 | 3.30E-02 | 0.15 | control |
| miR_1275     | 3881651 | HCK        | -0.43 | 0.2  | -2.13 | 3.30E-02 | 0.15 | case    |
| miR_1248     | 3457891 | GLS2       | -2.23 | 1.05 | -2.13 | 3.40E-02 | 0.15 | control |
| miR_93_5p    | 3868283 | VRK3       | -0.64 | 0.3  | -2.13 | 3.40E-02 | 0.15 | case    |
| miR_625_5p   | 3770563 | ATP5H      | -0.34 | 0.16 | -2.12 | 3.40E-02 | 0.15 | control |
| miR_139_5p   | 3883971 | C20orf24   | -0.75 | 0.36 | -2.12 | 3.40E-02 | 0.15 | control |
| let_7c       | 3434760 | P2RX4      | 0.56  | 0.26 | 2.12  | 3.40E-02 | 0.15 | control |
| miR_1275     | 3572461 | C14orf1    | -0.49 | 0.23 | -2.12 | 3.40E-02 | 0.15 | control |
| miR_629_5p   | 3757840 | STAT3      | -0.54 | 0.25 | -2.12 | 3.40E-02 | 0.15 | case    |
| miR_425_3p   | 2633256 | ST3GAL6    | -0.46 | 0.22 | -2.12 | 3.40E-02 | 0.15 | control |
| miR_103a_3p  | 3066818 | NAMPT      | -0.51 | 0.24 | -2.12 | 3.40E-02 | 0.15 | control |
| miR_210      | 3181240 | TMOD1      | -0.24 | 0.11 | -2.12 | 3.40E-02 | 0.15 | control |
| miR_20b_5p   | 2495446 | INPP4A     | -0.59 | 0.28 | -2.12 | 3.40E-02 | 0.15 | case    |
| miR_454_3p   | 3131741 | RAB11FIP1  | -0.39 | 0.18 | -2.12 | 3.40E-02 | 0.15 | case    |
| miR_135a_5p  | 3168255 | HRCT1      | 0.59  | 0.28 | 2.12  | 3.40E-02 | 0.15 | control |
| miR_197_3p   | 3375245 | DDB1       | -0.61 | 0.29 | -2.12 | 3.40E-02 | 0.15 | case    |
| miR_301a_3p  | 3962678 | PACSIN2    | -0.4  | 0.19 | -2.12 | 3.40E-02 | 0.15 | case    |
| miR_941      | 2838656 | HMMR       | -0.6  | 0.28 | -2.12 | 3.40E-02 | 0.15 | control |
| miR_301a_3p  | 2948425 | PPP1R10    | -0.55 | 0.26 | -2.12 | 3.40E-02 | 0.15 | case    |
| miR_197_3p   | 2884578 | CCNJL      | -0.77 | 0.36 | -2.12 | 3.40E-02 | 0.15 | control |
| let_7d_3p    | 3217077 | HEMGN      | 0.18  | 0.08 | 2.12  | 3.40E-02 | 0.15 | control |
| miR_210      | 3334025 | MARK2      | -0.53 | 0.25 | -2.12 | 3.40E-02 | 0.15 | case    |
| miR_29b_2_5p | 3765580 | BRIP1      | -0.45 | 0.21 | -2.12 | 3.40E-02 | 0.15 | control |
| miR_125b_5p  | 2510884 | ARL6IP6    | -0.47 | 0.22 | -2.12 | 3.40E-02 | 0.15 | control |
| miR_625_3p   | 3888721 | PTPN1      | 0.69  | 0.32 | 2.12  | 3.40E-02 | 0.15 | control |
| miR_17_5p    | 2779992 | UBE2D3     | -0.79 | 0.37 | -2.12 | 3.40E-02 | 0.15 | control |
| miR_629_3p   | 3981735 | NCRNA00183 | 0.21  | 0.1  | 2.12  | 3.40E-02 | 0.15 | case    |
| miR_193a_5p  | 3565361 | GMFB       | 0.36  | 0.17 | 2.12  | 3.40E-02 | 0.15 | case    |
| miR_181a_5p  | 2544662 | DNMT3A     | -1.01 | 0.48 | -2.12 | 3.40E-02 | 0.15 | case    |
| miR_301a_3p  | 3861689 | SIRT2      | -0.36 | 0.17 | -2.12 | 3.40E-02 | 0.15 | case    |

|              |         |         |       |      |       |          |      |         |
|--------------|---------|---------|-------|------|-------|----------|------|---------|
| miR_181a_5p  | 2359817 | INTS3   | -0.62 | 0.29 | -2.12 | 3.40E-02 | 0.15 | case    |
| miR_93_5p    | 2545811 | PPM1G   | -0.58 | 0.28 | -2.12 | 3.40E-02 | 0.15 | case    |
| miR_210      | 2673902 | QRICH1  | -0.48 | 0.23 | -2.12 | 3.40E-02 | 0.15 | case    |
| miR_17_5p    | 2520069 | C2orf88 | -0.28 | 0.13 | -2.12 | 3.40E-02 | 0.15 | control |
| miR_1254     | 2436754 | ADAR    | -0.53 | 0.25 | -2.12 | 3.40E-02 | 0.15 | case    |
| miR_29b_2_5p | 3250863 | SGPL1   | -0.49 | 0.23 | -2.11 | 3.40E-02 | 0.15 | case    |
| miR_148a_3p  | 2390158 |         | 0.25  | 0.12 | 2.11  | 3.50E-02 | 0.15 | control |
| let_7d_3p    | 2783596 | PDE5A   | 0.33  | 0.16 | 2.11  | 3.50E-02 | 0.15 | control |
| miR_584_5p   | 2367843 | DARS2   | 1.82  | 0.86 | 2.11  | 3.50E-02 | 0.15 | control |
| miR_210      | 3748188 | FLII    | -0.5  | 0.24 | -2.11 | 3.50E-02 | 0.15 | case    |
| let_7b_5p    | 2349402 | AMY2B   | 0.24  | 0.12 | 2.11  | 3.50E-02 | 0.15 | case    |
| miR_155_5p   | 3432030 | ACAD10  | -0.85 | 0.4  | -2.11 | 3.50E-02 | 0.15 | case    |
| miR_210      | 3772525 | CYTH1   | -0.55 | 0.26 | -2.11 | 3.50E-02 | 0.15 | case    |
| miR_210      | 3329724 | MADD    | -0.45 | 0.21 | -2.11 | 3.50E-02 | 0.15 | case    |
| miR_29b_2_5p | 3960685 | DMC1    | -0.57 | 0.27 | -2.11 | 3.50E-02 | 0.15 | control |
| miR_301a_3p  | 3261544 | GBF1    | -0.43 | 0.21 | -2.11 | 3.50E-02 | 0.15 | case    |
| miR_155_5p   | 3763656 | TRIM25  | -0.46 | 0.22 | -2.11 | 3.50E-02 | 0.15 | case    |
| miR_197_3p   | 3944564 | CSF2RB  | -0.74 | 0.35 | -2.11 | 3.50E-02 | 0.15 | control |
| miR_301a_3p  | 2575196 | SAP130  | -0.63 | 0.3  | -2.11 | 3.50E-02 | 0.15 | case    |
| miR_1275     | 2420958 | ZNHIT6  | 0.28  | 0.13 | 2.11  | 3.50E-02 | 0.15 | case    |
| miR_744_3p   | 3676300 | RPS2    | 0.37  | 0.18 | 2.11  | 3.50E-02 | 0.15 | control |
| miR_590_5p   | 2867432 | ANKRD32 | -0.1  | 0.05 | -2.11 | 3.50E-02 | 0.15 | control |
| miR_1275     | 3708858 | CD68    | -0.5  | 0.24 | -2.11 | 3.50E-02 | 0.15 | case    |
| miR_106b_5p  | 2664452 | ANKRD28 | -0.47 | 0.22 | -2.11 | 3.50E-02 | 0.15 | control |
| miR_301a_3p  | 2845591 | BRD9    | -0.68 | 0.32 | -2.11 | 3.50E-02 | 0.15 | case    |
| miR_222_3p   | 2591421 | TFPI    | -0.42 | 0.2  | -2.11 | 3.50E-02 | 0.15 | control |
| miR_103a_3p  | 2594812 | TRAK2   | -0.31 | 0.15 | -2.11 | 3.50E-02 | 0.15 | control |
| miR_93_5p    | 2394841 | DNAJC11 | -0.53 | 0.25 | -2.11 | 3.50E-02 | 0.15 | case    |
| let_7c       | 3957486 | DUSP18  | 0.39  | 0.19 | 2.11  | 3.50E-02 | 0.15 | control |
| miR_197_3p   | 3419147 | USP15   | 0.62  | 0.3  | 2.11  | 3.50E-02 | 0.15 | case    |
| miR_744_5p   | 3372253 | CELF1   | -0.88 | 0.42 | -2.11 | 3.50E-02 | 0.15 | case    |
| miR_144_5p   | 3375340 | CPSF7   | -0.35 | 0.17 | -2.11 | 3.50E-02 | 0.15 | case    |
| miR_664_3p   | 3281762 | ENKUR   | 0.21  | 0.1  | 2.11  | 3.50E-02 | 0.15 | case    |
| miR_221_3p   | 3385175 | PICALM  | 0.37  | 0.17 | 2.11  | 3.50E-02 | 0.15 | case    |
| miR_148a_3p  | 2411228 | STIL    | -0.35 | 0.17 | -2.11 | 3.50E-02 | 0.15 | control |
| miR_375      | 3763270 | MMD     | -0.36 | 0.17 | -2.11 | 3.50E-02 | 0.15 | control |
| miR_27a_5p   | 3867400 | FUT1    | -0.58 | 0.28 | -2.11 | 3.50E-02 | 0.15 | case    |
| miR_132_3p   | 2539607 | MBOAT2  | -0.41 | 0.2  | -2.11 | 3.50E-02 | 0.15 | control |

|              |         |          |       |      |       |          |      |         |
|--------------|---------|----------|-------|------|-------|----------|------|---------|
| miR_425_3p   | 2930863 | PCMT1    | -0.49 | 0.23 | -2.11 | 3.50E-02 | 0.15 | control |
| miR_103a_3p  | 2591421 | TFPI     | -0.56 | 0.27 | -2.1  | 3.50E-02 | 0.15 | control |
| miR_29b_2_5p | 2499234 | CCDC138  | -0.62 | 0.29 | -2.1  | 3.50E-02 | 0.15 | control |
| miR_197_3p   | 3872928 | ZNF132   | -0.85 | 0.41 | -2.1  | 3.50E-02 | 0.15 | case    |
| miR_106b_5p  | 2806799 | NIPBL    | -0.41 | 0.2  | -2.1  | 3.50E-02 | 0.15 | control |
| miR_20b_5p   | 3821095 | TSPAN16  | -0.3  | 0.14 | -2.1  | 3.50E-02 | 0.15 | case    |
| miR_197_3p   | 3380901 | NUMA1    | -1.04 | 0.49 | -2.1  | 3.50E-02 | 0.15 | case    |
| miR_127_3p   | 2945645 | TDP2     | -0.36 | 0.17 | -2.1  | 3.50E-02 | 0.15 | control |
| miR_197_3p   | 3724360 | GOSR2    | -0.76 | 0.36 | -2.1  | 3.60E-02 | 0.15 | case    |
| miR_15b_3p   | 3936009 | IL17RA   | -0.43 | 0.2  | -2.1  | 3.60E-02 | 0.15 | control |
| miR_941      | 2887309 | DUSP1    | -0.45 | 0.21 | -2.1  | 3.60E-02 | 0.15 | control |
| miR_636      | 3840224 | ZNF528   | 0.46  | 0.22 | 2.1   | 3.60E-02 | 0.15 | case    |
| miR_197_3p   | 3375862 | MTA2     | -0.67 | 0.32 | -2.1  | 3.60E-02 | 0.15 | case    |
| miR_20b_5p   | 2504328 | GYPC     | -0.35 | 0.17 | -2.1  | 3.60E-02 | 0.15 | control |
| miR_148a_3p  | 3088983 | XPO7     | -0.31 | 0.15 | -2.1  | 3.60E-02 | 0.15 | control |
| miR_139_3p   | 3015414 | SPDYE3   | -0.57 | 0.27 | -2.1  | 3.60E-02 | 0.15 | case    |
| miR_221_3p   | 2995254 | C7orf41  | -0.47 | 0.22 | -2.1  | 3.60E-02 | 0.15 | control |
| miR_502_3p   | 2353988 | FAM46C   | -0.53 | 0.25 | -2.1  | 3.60E-02 | 0.15 | control |
| miR_744_5p   | 2358520 | SETDB1   | -0.63 | 0.3  | -2.1  | 3.60E-02 | 0.15 | case    |
| miR_1275     | 3439305 | ZNF84    | 0.38  | 0.18 | 2.1   | 3.60E-02 | 0.15 | case    |
| miR_210      | 3632298 | ADPGK    | -0.62 | 0.3  | -2.1  | 3.60E-02 | 0.15 | case    |
| miR_20b_5p   | 3095719 | GOLGA7   | -0.52 | 0.25 | -2.1  | 3.60E-02 | 0.15 | control |
| miR_501_3p   | 2887264 |          | -0.52 | 0.25 | -2.1  | 3.60E-02 | 0.15 | control |
| miR_210      | 2618598 | EIF1B    | -0.3  | 0.14 | -2.1  | 3.60E-02 | 0.15 | control |
| miR_144_5p   | 3665161 | C16orf70 | -0.38 | 0.18 | -2.1  | 3.60E-02 | 0.15 | case    |
| miR_1275     | 3768969 | ABCA5    | 0.4   | 0.19 | 2.1   | 3.60E-02 | 0.16 | case    |
| miR_29b_2_5p | 2594773 | ALS2CR12 | -0.32 | 0.15 | -2.1  | 3.60E-02 | 0.16 | control |
| miR_340_5p   | 3157660 | TSTA3    | 0.65  | 0.31 | 2.1   | 3.60E-02 | 0.16 | case    |
| miR_16_1_3p  | 3702293 | MBTPS1   | -0.77 | 0.37 | -2.1  | 3.60E-02 | 0.16 | case    |
| miR_301a_3p  | 3656223 | ITGAL    | -0.39 | 0.19 | -2.1  | 3.60E-02 | 0.16 | case    |
| miR_197_3p   | 3107234 | C8orf39  | -0.53 | 0.25 | -2.1  | 3.60E-02 | 0.16 | control |
| miR_197_3p   | 3015941 | SRRT     | -1    | 0.48 | -2.1  | 3.60E-02 | 0.16 | case    |
| miR_18a_3p   | 3850261 | ICAM3    | -0.56 | 0.27 | -2.1  | 3.60E-02 | 0.16 | control |
| miR_423_5p   | 3907111 | TOMM34   | -0.88 | 0.42 | -2.1  | 3.60E-02 | 0.16 | case    |
| miR_301a_3p  | 3456260 | ATF7     | -0.42 | 0.2  | -2.1  | 3.60E-02 | 0.16 | case    |
| miR_941      | 3129465 | INTS9    | -0.71 | 0.34 | -2.1  | 3.60E-02 | 0.16 | case    |
| let_7d_5p    | 3477967 |          | -0.4  | 0.19 | -2.1  | 3.60E-02 | 0.16 | case    |
| miR_629_3p   | 2584712 | GRB14    | -1.07 | 0.51 | -2.09 | 3.60E-02 | 0.16 | control |

|              |         |          |       |      |       |          |      |         |
|--------------|---------|----------|-------|------|-------|----------|------|---------|
| miR_29b_2_5p | 2942504 | RANBP9   | -0.46 | 0.22 | -2.09 | 3.60E-02 | 0.16 | control |
| miR_106a_5p  | 3563861 | CDKL1    | -0.96 | 0.46 | -2.09 | 3.60E-02 | 0.16 | control |
| miR_152      | 3702293 | MBTPS1   | -0.81 | 0.39 | -2.09 | 3.60E-02 | 0.16 | case    |
| miR_197_3p   | 2394841 | DNAJC11  | -0.78 | 0.37 | -2.09 | 3.60E-02 | 0.16 | case    |
| miR_629_5p   | 3294854 | CAMK2G   | -0.74 | 0.36 | -2.09 | 3.60E-02 | 0.16 | case    |
| miR_197_3p   | 3551566 | EVL      | -0.92 | 0.44 | -2.09 | 3.60E-02 | 0.16 | case    |
| miR_126_3p   | 2450345 | KIF14    | -0.46 | 0.22 | -2.09 | 3.60E-02 | 0.16 | control |
| miR_17_5p    | 3091301 | PTK2B    | -0.52 | 0.25 | -2.09 | 3.60E-02 | 0.16 | case    |
| let_7b_5p    | 3124537 | CTSB     | -0.35 | 0.17 | -2.09 | 3.60E-02 | 0.16 | case    |
| miR_106a_5p  | 3820443 | ICAM1    | -0.59 | 0.28 | -2.09 | 3.60E-02 | 0.16 | case    |
| miR_126_3p   | 2447454 | ARPC5    | -1.11 | 0.53 | -2.09 | 3.70E-02 | 0.16 | control |
| miR_210      | 4015602 | TRMT2B   | -0.5  | 0.24 | -2.09 | 3.70E-02 | 0.16 | case    |
| miR_27a_5p   | 3393200 | PCSK7    | -0.71 | 0.34 | -2.09 | 3.70E-02 | 0.16 | case    |
| miR_660_5p   | 2618598 | EIF1B    | -0.38 | 0.18 | -2.09 | 3.70E-02 | 0.16 | control |
| miR_17_5p    | 2832081 | ZMAT2    | -0.36 | 0.17 | -2.09 | 3.70E-02 | 0.16 | control |
| miR_181a_5p  | 2832081 | ZMAT2    | -0.4  | 0.19 | -2.09 | 3.70E-02 | 0.16 | control |
| miR_590_5p   | 3020192 | TES      | -0.21 | 0.1  | -2.09 | 3.70E-02 | 0.16 | control |
| miR_16_1_3p  | 2965674 | NDUFAF4  | -0.38 | 0.18 | -2.09 | 3.70E-02 | 0.16 | control |
| let_7e_5p    | 3114618 | RNF139   | 0.44  | 0.21 | 2.09  | 3.70E-02 | 0.16 | case    |
| miR_212_3p   | 3258092 | 5-Mar    | -0.58 | 0.28 | -2.09 | 3.70E-02 | 0.16 | control |
| miR_423_5p   | 3931112 | HLCS     | -1.05 | 0.5  | -2.09 | 3.70E-02 | 0.16 | case    |
| miR_16_5p    | 3419807 | XPOT     | 0.29  | 0.14 | 2.09  | 3.70E-02 | 0.16 | case    |
| miR_125b_5p  | 2502424 | INSIG2   | -0.47 | 0.22 | -2.09 | 3.70E-02 | 0.16 | control |
| let_7d_3p    | 3623424 | COPS2    | 0.2   | 0.1  | 2.09  | 3.70E-02 | 0.16 | control |
| let_7b_5p    | 2740896 | NDST3    | -0.8  | 0.38 | -2.09 | 3.70E-02 | 0.16 | control |
| miR_1275     | 3957003 | ASCC2    | -0.29 | 0.14 | -2.09 | 3.70E-02 | 0.16 | case    |
| miR_148a_3p  | 3114064 | WDR67    | -0.29 | 0.14 | -2.09 | 3.70E-02 | 0.16 | control |
| miR_29b_2_5p | 2620256 | KIF15    | -0.48 | 0.23 | -2.09 | 3.70E-02 | 0.16 | control |
| miR_17_5p    | 3656990 | ITGAM    | -0.4  | 0.19 | -2.09 | 3.70E-02 | 0.16 | case    |
| miR_93_5p    | 3179975 | PHF2     | -0.87 | 0.42 | -2.09 | 3.70E-02 | 0.16 | case    |
| miR_181a_5p  | 3464912 | POC1B    | -0.32 | 0.15 | -2.09 | 3.70E-02 | 0.16 | control |
| miR_210      | 4010860 | LAS1L    | -0.48 | 0.23 | -2.09 | 3.70E-02 | 0.16 | case    |
| miR_18a_3p   | 3297536 | ANXA11   | -0.78 | 0.37 | -2.09 | 3.70E-02 | 0.16 | control |
| miR_210      | 3302360 | MMS19    | -0.67 | 0.32 | -2.09 | 3.70E-02 | 0.16 | case    |
| miR_328      | 3929291 | C21orf59 | 0.94  | 0.45 | 2.09  | 3.70E-02 | 0.16 | control |
| miR_1236     | 2778856 | TSPAN5   | 0.59  | 0.28 | 2.08  | 3.70E-02 | 0.16 | control |
| miR_181a_5p  | 2588827 | NFE2L2   | -0.53 | 0.26 | -2.08 | 3.70E-02 | 0.16 | control |
| miR_106a_5p  | 3821095 | TSPAN16  | -0.3  | 0.14 | -2.08 | 3.70E-02 | 0.16 | case    |

|              |         |              |       |      |       |          |      |         |
|--------------|---------|--------------|-------|------|-------|----------|------|---------|
| miR_150_5p   | 3498476 | LOC100132099 | -0.76 | 0.36 | -2.08 | 3.70E-02 | 0.16 | control |
| miR_210      | 3632152 | HEXA         | -0.56 | 0.27 | -2.08 | 3.70E-02 | 0.16 | case    |
| miR_210      | 2545750 | EIF2B4       | -0.58 | 0.28 | -2.08 | 3.70E-02 | 0.16 | case    |
| miR_590_5p   | 2448073 | IVNS1ABP     | -0.24 | 0.11 | -2.08 | 3.70E-02 | 0.16 | control |
| miR_29b_2_5p | 2411228 | STIL         | -0.44 | 0.21 | -2.08 | 3.70E-02 | 0.16 | control |
| miR_339_3p   | 3159132 | COMMD5       | 0.97  | 0.46 | 2.08  | 3.70E-02 | 0.16 | control |
| miR_301a_3p  | 3719980 | LASP1        | -0.46 | 0.22 | -2.08 | 3.70E-02 | 0.16 | case    |
| miR_193a_5p  | 2505529 | PTPN18       | -0.87 | 0.42 | -2.08 | 3.70E-02 | 0.16 | case    |
| miR_197_3p   | 3695867 | RANBP10      | -0.61 | 0.29 | -2.08 | 3.70E-02 | 0.16 | case    |
| miR_20a_5p   | 2958670 | RAB23        | -0.34 | 0.16 | -2.08 | 3.70E-02 | 0.16 | control |
| miR_629_5p   | 3903708 | TRPC4AP      | -0.85 | 0.41 | -2.08 | 3.70E-02 | 0.16 | case    |
| let_7c       | 3441941 | VAMP1        | 0.53  | 0.26 | 2.08  | 3.70E-02 | 0.16 | control |
| miR_106a_5p  | 3816380 | OAZ1         | -0.59 | 0.28 | -2.08 | 3.70E-02 | 0.16 | control |
| miR_1275     | 2896545 | GMPR         | -0.24 | 0.11 | -2.08 | 3.70E-02 | 0.16 | case    |
| miR_181a_5p  | 2360083 | UBAP2L       | -0.66 | 0.32 | -2.08 | 3.70E-02 | 0.16 | case    |
| miR_505_5p   | 3109201 | SPAG1        | -0.95 | 0.46 | -2.08 | 3.70E-02 | 0.16 | control |
| miR_590_5p   | 2321911 | DDI2         | -0.23 | 0.11 | -2.08 | 3.70E-02 | 0.16 | control |
| miR_590_5p   | 3829575 | LSM14A       | -0.36 | 0.17 | -2.08 | 3.80E-02 | 0.16 | control |
| miR_331_5p   | 3449700 | FAM60A       | -2.24 | 1.08 | -2.08 | 3.80E-02 | 0.16 | case    |
| miR_106a_5p  | 3936009 | IL17RA       | -0.43 | 0.21 | -2.08 | 3.80E-02 | 0.16 | case    |
| miR_320a     | 2504328 | GYPC         | -0.53 | 0.26 | -2.08 | 3.80E-02 | 0.16 | control |
| miR_181a_5p  | 3914786 | ABCC13       | -0.48 | 0.23 | -2.08 | 3.80E-02 | 0.16 | control |
| miR_181a_5p  | 3763656 | TRIM25       | -0.52 | 0.25 | -2.08 | 3.80E-02 | 0.16 | case    |
| miR_532_5p   | 3464912 | POC1B        | -0.31 | 0.15 | -2.08 | 3.80E-02 | 0.16 | control |
| miR_181a_5p  | 2676471 | TMEM110      | -0.63 | 0.3  | -2.08 | 3.80E-02 | 0.16 | case    |
| miR_301a_3p  | 3757770 | STAT5B       | -0.46 | 0.22 | -2.08 | 3.80E-02 | 0.16 | case    |
| miR_210      | 2832081 | ZMAT2        | -0.29 | 0.14 | -2.07 | 3.80E-02 | 0.16 | control |
| miR_197_3p   | 3698919 | GLG1         | -0.6  | 0.29 | -2.07 | 3.80E-02 | 0.16 | case    |
| miR_152      | 2333429 | KDM4A        | -0.78 | 0.38 | -2.07 | 3.80E-02 | 0.16 | case    |
| miR_128      | 2580699 | FLJ32955     | 0.8   | 0.39 | 2.07  | 3.80E-02 | 0.16 | control |
| miR_1275     | 3089102 | EPB49        | -0.26 | 0.12 | -2.07 | 3.80E-02 | 0.16 | case    |
| miR_139_5p   | 3107234 | C8orf39      | -0.44 | 0.21 | -2.07 | 3.80E-02 | 0.16 | control |
| miR_19a_3p   | 2594812 | TRAK2        | -0.25 | 0.12 | -2.07 | 3.80E-02 | 0.16 | control |
| miR_197_3p   | 2945645 | TDP2         | 0.44  | 0.21 | 2.07  | 3.80E-02 | 0.16 | case    |
| miR_20a_5p   | 2662491 | TMEM111      | -0.26 | 0.13 | -2.07 | 3.80E-02 | 0.16 | control |
| miR_20a_5p   | 2406420 | CLSPN        | -0.46 | 0.22 | -2.07 | 3.80E-02 | 0.16 | control |
| miR_27a_5p   | 3430959 | ACACB        | -1.02 | 0.49 | -2.07 | 3.80E-02 | 0.16 | case    |
| miR_340_5p   | 3064591 | FIS1         | 0.56  | 0.27 | 2.07  | 3.90E-02 | 0.16 | case    |

|              |         |          |       |      |       |          |      |         |
|--------------|---------|----------|-------|------|-------|----------|------|---------|
| miR_1255b_5p | 3628469 | RPS27L   | 0.18  | 0.09 | 2.07  | 3.90E-02 | 0.16 | case    |
| miR_301a_3p  | 3191900 | NUP214   | -0.53 | 0.25 | -2.07 | 3.90E-02 | 0.16 | case    |
| miR_27a_5p   | 3417075 | DGKA     | -0.49 | 0.24 | -2.07 | 3.90E-02 | 0.16 | case    |
| miR_628_3p   | 2702724 | LXN      | -0.43 | 0.21 | -2.07 | 3.90E-02 | 0.16 | control |
| miR_590_5p   | 3917204 | C21orf7  | -0.22 | 0.11 | -2.07 | 3.90E-02 | 0.16 | control |
| miR_17_5p    | 2360257 | IL6R     | -0.52 | 0.25 | -2.07 | 3.90E-02 | 0.16 | case    |
| miR_301a_3p  | 2673902 | QRICH1   | -0.42 | 0.2  | -2.07 | 3.90E-02 | 0.16 | case    |
| miR_210      | 2594812 | TRAK2    | -0.23 | 0.11 | -2.07 | 3.90E-02 | 0.16 | control |
| miR_93_3p    | 2773358 | PPBP     | 0.33  | 0.16 | 2.07  | 3.90E-02 | 0.16 | case    |
| miR_210      | 2396537 | MTOR     | -0.48 | 0.23 | -2.06 | 3.90E-02 | 0.16 | case    |
| miR_148a_3p  | 3984655 | CENPI    | -0.38 | 0.18 | -2.06 | 3.90E-02 | 0.16 | control |
| miR_197_3p   | 3633522 | SNUPN    | -0.7  | 0.34 | -2.06 | 3.90E-02 | 0.16 | case    |
| miR_590_5p   | 3992148 | DDX26B   | -0.24 | 0.11 | -2.06 | 3.90E-02 | 0.16 | control |
| miR_106a_5p  | 3375340 | CPSF7    | -0.54 | 0.26 | -2.06 | 3.90E-02 | 0.16 | case    |
| miR_144_5p   | 3772525 | CYTH1    | -0.31 | 0.15 | -2.06 | 3.90E-02 | 0.16 | case    |
| miR_146a_5p  | 2995254 | C7orf41  | -0.48 | 0.23 | -2.06 | 3.90E-02 | 0.16 | control |
| miR_106b_5p  | 2504328 | GYPC     | -0.35 | 0.17 | -2.06 | 3.90E-02 | 0.16 | control |
| miR_93_5p    | 3820921 | SMARCA4  | -0.51 | 0.25 | -2.06 | 3.90E-02 | 0.16 | case    |
| miR_155_5p   | 3721658 | STAT5A   | -0.62 | 0.3  | -2.06 | 3.90E-02 | 0.16 | case    |
| miR_181a_5p  | 2360257 | IL6R     | -0.6  | 0.29 | -2.06 | 3.90E-02 | 0.16 | case    |
| miR_590_5p   | 3476012 | MPHOSPH9 | -0.19 | 0.09 | -2.06 | 3.90E-02 | 0.16 | control |
| miR_423_5p   | 3806905 | SMAD2    | 0.52  | 0.25 | 2.06  | 3.90E-02 | 0.16 | case    |
| miR_454_3p   | 3372253 | CELF1    | -0.48 | 0.23 | -2.06 | 4.00E-02 | 0.16 | case    |
| let_7c       | 3666542 | HAS3     | 0.64  | 0.31 | 2.06  | 4.00E-02 | 0.16 | control |
| miR_210      | 3959986 | IL2RB    | -0.4  | 0.2  | -2.06 | 4.00E-02 | 0.16 | case    |
| miR_221_3p   | 3018375 | PRKAR2B  | -0.3  | 0.14 | -2.06 | 4.00E-02 | 0.16 | control |
| miR_17_5p    | 2591421 | TFPI     | -0.46 | 0.22 | -2.06 | 4.00E-02 | 0.16 | control |
| miR_20b_5p   | 2730673 | MOBK1A   | -0.3  | 0.15 | -2.06 | 4.00E-02 | 0.16 | control |
| miR_17_5p    | 2662491 | TMEM111  | -0.3  | 0.14 | -2.06 | 4.00E-02 | 0.16 | control |
| miR_625_5p   | 3456666 | NFE2     | -0.38 | 0.19 | -2.06 | 4.00E-02 | 0.16 | control |
| miR_193a_5p  | 3281762 | ENKUR    | 0.23  | 0.11 | 2.06  | 4.00E-02 | 0.16 | case    |
| miR_24_2_5p  | 3839057 | TBC1D17  | -0.99 | 0.48 | -2.06 | 4.00E-02 | 0.16 | case    |
| miR_744_5p   | 3454740 | PHB      | 0.52  | 0.25 | 2.06  | 4.00E-02 | 0.16 | control |
| miR_15b_3p   | 3244622 | ALOX5    | -0.42 | 0.2  | -2.06 | 4.00E-02 | 0.16 | control |
| miR_29c_3p   | 2801608 | 6-Mar    | -0.57 | 0.28 | -2.06 | 4.00E-02 | 0.16 | control |
| miR_24_2_5p  | 3569441 | ZFYVE26  | -0.91 | 0.44 | -2.06 | 4.00E-02 | 0.16 | case    |
| miR_150_5p   | 3812426 | RTTN     | 1.21  | 0.59 | 2.06  | 4.00E-02 | 0.16 | case    |
| miR_151a_5p  | 2428313 | ST7L     | -0.63 | 0.31 | -2.06 | 4.00E-02 | 0.16 | control |

|              |         |          |       |      |       |          |      |         |
|--------------|---------|----------|-------|------|-------|----------|------|---------|
| let_7d_3p    | 3346584 | BIRC2    | 0.24  | 0.12 | 2.06  | 4.00E-02 | 0.16 | control |
| miR_196b_5p  | 2768145 | COMMD8   | -0.31 | 0.15 | -2.06 | 4.00E-02 | 0.16 | control |
| miR_424_3p   | 4017281 | NUP62CL  | 0.53  | 0.26 | 2.05  | 4.00E-02 | 0.16 | case    |
| let_7c       | 2859667 | CENPK    | -0.21 | 0.1  | -2.05 | 4.00E-02 | 0.16 | control |
| miR_210      | 3846538 | EEF2     | -0.42 | 0.2  | -2.05 | 4.00E-02 | 0.16 | case    |
| let_7b_5p    | 3294231 | NUDT13   | 0.41  | 0.2  | 2.05  | 4.00E-02 | 0.16 | control |
| miR_106a_5p  | 3095719 | GOLGA7   | -0.52 | 0.26 | -2.05 | 4.00E-02 | 0.16 | control |
| let_7c       | 4051226 | SEMA4D   | -0.62 | 0.3  | -2.05 | 4.00E-02 | 0.16 | case    |
| miR_17_5p    | 2449559 | ASPM     | -0.56 | 0.27 | -2.05 | 4.00E-02 | 0.16 | control |
| miR_590_5p   | 2724154 | KLHL5    | -0.21 | 0.1  | -2.05 | 4.00E-02 | 0.16 | control |
| miR_744_5p   | 3781654 | RIOK3    | -0.44 | 0.22 | -2.05 | 4.00E-02 | 0.16 | control |
| miR_301a_3p  | 2440143 | COPA     | -0.42 | 0.21 | -2.05 | 4.00E-02 | 0.16 | case    |
| miR_148b_5p  | 3892452 | LSM14B   | 0.5   | 0.24 | 2.05  | 4.00E-02 | 0.16 | case    |
| miR_301a_3p  | 3179975 | PHF2     | -0.77 | 0.38 | -2.05 | 4.00E-02 | 0.16 | case    |
| miR_93_5p    | 2520069 | C2orf88  | -0.27 | 0.13 | -2.05 | 4.00E-02 | 0.16 | control |
| miR_210      | 3743464 | PHF23    | -0.53 | 0.26 | -2.05 | 4.00E-02 | 0.16 | case    |
| miR_197_3p   | 3832978 | ZFP36    | -0.85 | 0.41 | -2.05 | 4.00E-02 | 0.16 | control |
| miR_339_3p   | 2504328 | GYPC     | -0.36 | 0.18 | -2.05 | 4.10E-02 | 0.16 | control |
| let_7b_5p    | 2570616 | BUB1     | -0.77 | 0.38 | -2.05 | 4.10E-02 | 0.16 | control |
| miR_210      | 2395890 | CLSTN1   | -0.39 | 0.19 | -2.05 | 4.10E-02 | 0.16 | case    |
| miR_93_5p    | 2562233 | RETSAT   | -0.7  | 0.34 | -2.05 | 4.10E-02 | 0.16 | case    |
| miR_301a_3p  | 3672059 | KIAA0513 | -0.35 | 0.17 | -2.05 | 4.10E-02 | 0.16 | case    |
| miR_155_5p   | 3458337 | STAT6    | -0.55 | 0.27 | -2.05 | 4.10E-02 | 0.16 | case    |
| miR_20b_5p   | 2486178 | MEIS1    | -0.51 | 0.25 | -2.05 | 4.10E-02 | 0.16 | control |
| miR_106b_5p  | 2867432 | ANKRD32  | -0.2  | 0.1  | -2.05 | 4.10E-02 | 0.16 | control |
| miR_502_3p   | 2910477 | FBXO9    | -0.38 | 0.19 | -2.05 | 4.10E-02 | 0.16 | control |
| miR_15b_3p   | 3740264 | INPP5K   | -0.49 | 0.24 | -2.05 | 4.10E-02 | 0.16 | control |
| let_7d_3p    | 3163728 | CNTLN    | 0.25  | 0.12 | 2.05  | 4.10E-02 | 0.16 | control |
| miR_145_5p   | 3071700 | IMPDH1   | -0.84 | 0.41 | -2.05 | 4.10E-02 | 0.16 | control |
| miR_744_5p   | 2579439 | GTDC1    | -0.7  | 0.34 | -2.05 | 4.10E-02 | 0.16 | control |
| miR_145_5p   | 3107234 | C8orf39  | -0.38 | 0.18 | -2.05 | 4.10E-02 | 0.16 | control |
| miR_29b_2_5p | 3379644 | CPT1A    | -0.48 | 0.24 | -2.05 | 4.10E-02 | 0.16 | case    |
| let_7b_5p    | 3434413 | RNF10    | -0.24 | 0.12 | -2.05 | 4.10E-02 | 0.16 | case    |
| miR_25_5p    | 2752725 | NEIL3    | -0.36 | 0.17 | -2.05 | 4.10E-02 | 0.16 | control |
| miR_29b_2_5p | 3589697 | BUB1B    | -0.89 | 0.44 | -2.04 | 4.10E-02 | 0.16 | control |
| miR_20b_5p   | 2609960 | TTLL3    | -0.7  | 0.34 | -2.04 | 4.10E-02 | 0.16 | case    |
| let_7c       | 3633048 | EDC3     | 0.54  | 0.26 | 2.04  | 4.10E-02 | 0.16 | control |
| miR_20b_5p   | 2958670 | RAB23    | -0.34 | 0.17 | -2.04 | 4.10E-02 | 0.16 | control |



|              |         |           |       |      |       |          |      |         |
|--------------|---------|-----------|-------|------|-------|----------|------|---------|
| miR_628_3p   | 3764738 | SKA2      | 0.31  | 0.15 | 2.04  | 4.10E-02 | 0.16 | case    |
| miR_210      | 3820758 | DNM2      | -0.48 | 0.23 | -2.04 | 4.10E-02 | 0.16 | case    |
| miR_210      | 4027769 | CLIC2     | -0.23 | 0.11 | -2.04 | 4.10E-02 | 0.16 | control |
| miR_590_5p   | 2995254 | C7orf41   | -0.21 | 0.11 | -2.04 | 4.10E-02 | 0.16 | control |
| miR_590_5p   | 2346399 | CDC7      | -0.21 | 0.1  | -2.04 | 4.10E-02 | 0.16 | control |
| miR_31_5p    | 2527548 | RUFY4     | -0.73 | 0.36 | -2.04 | 4.10E-02 | 0.16 | case    |
| let_7c       | 2897627 |           | 0.24  | 0.12 | 2.04  | 4.10E-02 | 0.16 | case    |
| miR_193a_5p  | 3440192 | DCP1B     | 0.7   | 0.34 | 2.04  | 4.10E-02 | 0.16 | control |
| let_7g_5p    | 3942179 | MTMR3     | -0.45 | 0.22 | -2.04 | 4.10E-02 | 0.16 | case    |
| let_7d_3p    | 3320819 | MICALCL   | 0.23  | 0.11 | 2.04  | 4.10E-02 | 0.16 | control |
| miR_590_5p   | 2583602 | RBMS1     | -0.19 | 0.09 | -2.04 | 4.10E-02 | 0.16 | control |
| miR_210      | 3741997 | ANKFY1    | -0.47 | 0.23 | -2.04 | 4.10E-02 | 0.16 | case    |
| miR_502_3p   | 2801608 | 6-Mar     | -0.74 | 0.36 | -2.04 | 4.10E-02 | 0.16 | control |
| let_7d_3p    | 2811656 | KIF2A     | 0.22  | 0.11 | 2.04  | 4.10E-02 | 0.16 | control |
| miR_106a_5p  | 2587618 | OLA1      | -0.52 | 0.26 | -2.04 | 4.10E-02 | 0.16 | control |
| miR_148a_3p  | 2993206 | MPP6      | -0.23 | 0.11 | -2.04 | 4.20E-02 | 0.16 | control |
| let_7d_5p    | 2411228 | STIL      | -0.47 | 0.23 | -2.04 | 4.20E-02 | 0.16 | control |
| miR_590_5p   | 2531712 | PSMD1     | -0.23 | 0.11 | -2.04 | 4.20E-02 | 0.16 | control |
| miR_196b_5p  | 2620256 | KIF15     | -0.44 | 0.22 | -2.04 | 4.20E-02 | 0.16 | control |
| miR_301a_3p  | 3432267 | TRAFD1    | -0.42 | 0.21 | -2.04 | 4.20E-02 | 0.16 | case    |
| let_7g_5p    | 3074640 | LUZP6     | -0.64 | 0.31 | -2.04 | 4.20E-02 | 0.16 | control |
| miR_155_5p   | 3179975 | PHF2      | -0.89 | 0.44 | -2.04 | 4.20E-02 | 0.16 | case    |
| miR_744_5p   | 2801608 | 6-Mar     | -0.89 | 0.44 | -2.04 | 4.20E-02 | 0.16 | control |
| miR_766_3p   | 2773358 | PPBP      | 0.32  | 0.16 | 2.04  | 4.20E-02 | 0.16 | case    |
| miR_330_3p   | 3806905 | SMAD2     | 0.47  | 0.23 | 2.04  | 4.20E-02 | 0.16 | case    |
| let_7c       | 2329077 | S100PBP   | 0.5   | 0.24 | 2.04  | 4.20E-02 | 0.16 | control |
| miR_590_5p   | 3101893 | CSPP1     | -0.16 | 0.08 | -2.04 | 4.20E-02 | 0.16 | control |
| miR_93_5p    | 2609870 | BRPF1     | -0.67 | 0.33 | -2.04 | 4.20E-02 | 0.16 | case    |
| miR_17_5p    | 2450345 | KIF14     | -0.49 | 0.24 | -2.03 | 4.20E-02 | 0.16 | control |
| miR_106b_5p  | 2520069 | C2orf88   | -0.28 | 0.14 | -2.03 | 4.20E-02 | 0.16 | control |
| miR_15b_5p   | 2437736 | RIT1      | -0.79 | 0.39 | -2.03 | 4.20E-02 | 0.16 | control |
| miR_210      | 3572278 | NEK9      | -0.6  | 0.29 | -2.03 | 4.20E-02 | 0.16 | case    |
| miR_505_5p   | 2824872 | AP3S1     | 0.51  | 0.25 | 2.03  | 4.20E-02 | 0.16 | case    |
| miR_197_3p   | 3229591 | UBAC1     | -0.95 | 0.46 | -2.03 | 4.20E-02 | 0.16 | case    |
| miR_29b_2_5p | 3402571 | NCAPD2    | -0.57 | 0.28 | -2.03 | 4.20E-02 | 0.16 | case    |
| miR_744_5p   | 3890109 | C20orf108 | -0.8  | 0.4  | -2.03 | 4.20E-02 | 0.16 | control |
| miR_103a_3p  | 2504328 | GYPC      | -0.4  | 0.2  | -2.03 | 4.20E-02 | 0.16 | control |
| miR_20b_5p   | 3764738 | SKA2      | 0.31  | 0.15 | 2.03  | 4.20E-02 | 0.16 | case    |

|              |         |          |       |      |       |          |      |         |
|--------------|---------|----------|-------|------|-------|----------|------|---------|
| miR_181a_5p  | 3978453 | GNL3L    | -0.55 | 0.27 | -2.03 | 4.20E-02 | 0.16 | case    |
| miR_1275     | 3534201 | PRPF39   | 0.38  | 0.19 | 2.03  | 4.20E-02 | 0.16 | case    |
| miR_193a_5p  | 3806905 | SMAD2    | 0.33  | 0.16 | 2.03  | 4.20E-02 | 0.16 | case    |
| miR_454_3p   | 2503200 | RALB     | -0.32 | 0.16 | -2.03 | 4.20E-02 | 0.16 | control |
| miR_24_3p    | 2945645 | TDP2     | -0.7  | 0.35 | -2.03 | 4.20E-02 | 0.16 | control |
| miR_590_5p   | 2784177 | TRPC3    | 0.46  | 0.23 | 2.03  | 4.20E-02 | 0.16 | control |
| let_7d_3p    | 3629811 | DENND4A  | 0.23  | 0.11 | 2.03  | 4.20E-02 | 0.16 | control |
| miR_93_5p    | 3757770 | STAT5B   | -0.52 | 0.26 | -2.03 | 4.20E-02 | 0.16 | case    |
| miR_29b_2_5p | 3589410 | C15orf54 | -0.22 | 0.11 | -2.03 | 4.20E-02 | 0.17 | control |
| miR_20b_5p   | 2383859 | GUK1     | -0.26 | 0.13 | -2.03 | 4.20E-02 | 0.17 | control |
| miR_103a_3p  | 3328745 | PRDM11   | 0.86  | 0.43 | 2.03  | 4.30E-02 | 0.17 | control |
| miR_320a     | 3460127 | GNS      | -0.57 | 0.28 | -2.03 | 4.30E-02 | 0.17 | case    |
| miR_18a_3p   | 3355114 | DCPS     | -0.69 | 0.34 | -2.03 | 4.30E-02 | 0.17 | control |
| let_7b_5p    | 3689880 | SHCBP1   | 0.83  | 0.41 | 2.03  | 4.30E-02 | 0.17 | case    |
| miR_193a_5p  | 3961932 | TOB2     | -0.76 | 0.38 | -2.03 | 4.30E-02 | 0.17 | case    |
| miR_1227     | 2793401 | MFAP3L   | 0.37  | 0.18 | 2.03  | 4.30E-02 | 0.17 | case    |
| miR_26b_3p   | 2929699 | RAB32    | -0.43 | 0.21 | -2.03 | 4.30E-02 | 0.17 | control |
| miR_148a_3p  | 3203753 | UBAP2    | -0.63 | 0.31 | -2.03 | 4.30E-02 | 0.17 | control |
| miR_106b_5p  | 3105430 | LRRCC1   | -0.39 | 0.19 | -2.03 | 4.30E-02 | 0.17 | control |
| miR_210      | 3571248 | ZFYVE1   | -0.69 | 0.34 | -2.03 | 4.30E-02 | 0.17 | case    |
| miR_20a_5p   | 2591837 | SLC40A1  | -0.38 | 0.19 | -2.03 | 4.30E-02 | 0.17 | control |
| miR_502_3p   | 2458082 | WDR26    | -0.53 | 0.26 | -2.03 | 4.30E-02 | 0.17 | control |
| miR_17_5p    | 2399409 | UBR4     | -0.42 | 0.21 | -2.02 | 4.30E-02 | 0.17 | case    |
| miR_16_1_3p  | 2945882 | CMAH     | -0.58 | 0.29 | -2.02 | 4.30E-02 | 0.17 | control |
| miR_671_3p   | 2989050 | RAC1     | -0.59 | 0.29 | -2.02 | 4.30E-02 | 0.17 | control |
| miR_125a_5p  | 2580699 | FLJ32955 | 0.66  | 0.33 | 2.02  | 4.30E-02 | 0.17 | control |
| miR_29b_2_5p | 3758317 | BRCA1    | -0.59 | 0.29 | -2.02 | 4.30E-02 | 0.17 | control |
| miR_151a_3p  | 2364438 | NUF2     | 0.52  | 0.26 | 2.02  | 4.30E-02 | 0.17 | case    |
| miR_200c_3p  | 3471327 | HVCN1    | -0.53 | 0.26 | -2.02 | 4.30E-02 | 0.17 | case    |
| let_7c       | 2726323 | SLAIN2   | -0.55 | 0.27 | -2.02 | 4.30E-02 | 0.17 | control |
| miR_210      | 3743906 | TP53     | -0.44 | 0.22 | -2.02 | 4.30E-02 | 0.17 | case    |
| miR_590_5p   | 2712632 | TFRC     | -0.14 | 0.07 | -2.02 | 4.30E-02 | 0.17 | control |
| miR_103a_3p  | 3464912 | POC1B    | -0.31 | 0.15 | -2.02 | 4.30E-02 | 0.17 | control |
| miR_181a_5p  | 3735392 | ZACN     | -0.91 | 0.45 | -2.02 | 4.30E-02 | 0.17 | case    |
| miR_744_5p   | 2396537 | MTOR     | -0.69 | 0.34 | -2.02 | 4.30E-02 | 0.17 | case    |
| miR_301a_3p  | 3431892 | SH2B3    | -0.8  | 0.39 | -2.02 | 4.30E-02 | 0.17 | case    |
| let_7c       | 3299504 | ACTA2    | -0.4  | 0.2  | -2.02 | 4.30E-02 | 0.17 | case    |
| miR_196b_5p  | 2399908 | TMCO4    | 1.04  | 0.52 | 2.02  | 4.30E-02 | 0.17 | control |

|              |         |           |       |      |       |          |      |         |
|--------------|---------|-----------|-------|------|-------|----------|------|---------|
| let_7c       | 3655708 | C16orf53  | 0.59  | 0.29 | 2.02  | 4.30E-02 | 0.17 | control |
| miR_29b_2_5p | 3258168 | KIF11     | -0.55 | 0.27 | -2.02 | 4.30E-02 | 0.17 | control |
| miR_210      | 3464912 | POC1B     | -0.23 | 0.12 | -2.02 | 4.30E-02 | 0.17 | control |
| miR_20a_5p   | 2752725 | NEIL3     | -0.32 | 0.16 | -2.02 | 4.30E-02 | 0.17 | control |
| miR_103a_3p  | 2945645 | TDP2      | -0.44 | 0.22 | -2.02 | 4.30E-02 | 0.17 | control |
| miR_511      | 2784265 | IL2       | 0.84  | 0.42 | 2.02  | 4.30E-02 | 0.17 | case    |
| miR_210      | 3735847 | SETP9     | -0.59 | 0.29 | -2.02 | 4.30E-02 | 0.17 | case    |
| miR_197_3p   | 2644202 | IL20RB    | 0.37  | 0.18 | 2.02  | 4.40E-02 | 0.17 | control |
| let_7d_3p    | 3352503 | ARHGEF12  | 0.17  | 0.08 | 2.02  | 4.40E-02 | 0.17 | control |
| miR_139_3p   | 3763270 | MMD       | -0.26 | 0.13 | -2.02 | 4.40E-02 | 0.17 | control |
| miR_25_5p    | 2899152 | HIST1H2AC | 0.45  | 0.22 | 2.02  | 4.40E-02 | 0.17 | case    |
| miR_320a     | 3476741 | UBC       | -0.92 | 0.46 | -2.02 | 4.40E-02 | 0.17 | case    |
| miR_1275     | 3199431 | ZDHHHC21  | 0.28  | 0.14 | 2.02  | 4.40E-02 | 0.17 | case    |
| miR_181a_5p  | 2361731 | PRCC      | -0.79 | 0.39 | -2.02 | 4.40E-02 | 0.17 | case    |
| miR_29c_3p   | 3464912 | POC1B     | -0.23 | 0.11 | -2.02 | 4.40E-02 | 0.17 | control |
| miR_210      | 3633048 | EDC3      | -0.45 | 0.22 | -2.02 | 4.40E-02 | 0.17 | case    |
| miR_181a_5p  | 3015395 | PVRIG     | 0.39  | 0.19 | 2.02  | 4.40E-02 | 0.17 | control |
| miR_301a_3p  | 2674179 | USP4      | -0.37 | 0.18 | -2.02 | 4.40E-02 | 0.17 | case    |
| miR_106a_5p  | 3253683 | ZMIZ1     | -0.49 | 0.24 | -2.02 | 4.40E-02 | 0.17 | case    |
| miR_106b_5p  | 3101893 | CSPP1     | -0.32 | 0.16 | -2.02 | 4.40E-02 | 0.17 | control |
| miR_301a_3p  | 3868283 | VRK3      | -0.53 | 0.26 | -2.02 | 4.40E-02 | 0.17 | case    |
| miR_301a_3p  | 3715703 | SUPT6H    | -0.33 | 0.16 | -2.02 | 4.40E-02 | 0.17 | case    |
| let_7g_5p    | 2450345 | KIF14     | -0.42 | 0.21 | -2.02 | 4.40E-02 | 0.17 | control |
| miR_221_3p   | 2954678 | XPO5      | -0.66 | 0.33 | -2.02 | 4.40E-02 | 0.17 | case    |
| miR_1275     | 3542207 | SRSF5     | 0.51  | 0.25 | 2.02  | 4.40E-02 | 0.17 | case    |
| miR_106a_5p  | 2360257 | IL6R      | -0.48 | 0.24 | -2.01 | 4.40E-02 | 0.17 | case    |
| miR_181a_5p  | 2760371 | WDR1      | -0.59 | 0.29 | -2.01 | 4.40E-02 | 0.17 | case    |
| miR_197_3p   | 3621029 | EPB42     | -0.45 | 0.22 | -2.01 | 4.40E-02 | 0.17 | case    |
| miR_20b_5p   | 2520069 | C2orf88   | -0.25 | 0.12 | -2.01 | 4.40E-02 | 0.17 | control |
| miR_197_3p   | 3861413 | MAP4K1    | -0.65 | 0.32 | -2.01 | 4.40E-02 | 0.17 | case    |
| miR_744_5p   | 2504328 | GYPC      | -0.51 | 0.25 | -2.01 | 4.40E-02 | 0.17 | control |
| miR_210      | 3217123 | TRIM14    | -0.57 | 0.29 | -2.01 | 4.40E-02 | 0.17 | case    |
| miR_29b_2_5p | 3590388 | NUSAP1    | -0.38 | 0.19 | -2.01 | 4.40E-02 | 0.17 | control |
| miR_744_5p   | 3318712 | FXC1      | -0.78 | 0.39 | -2.01 | 4.40E-02 | 0.17 | case    |
| miR_744_5p   | 2673902 | QRICH1    | -0.62 | 0.31 | -2.01 | 4.40E-02 | 0.17 | case    |
| miR_181a_5p  | 3764738 | SKA2      | 0.35  | 0.17 | 2.01  | 4.40E-02 | 0.17 | case    |
| miR_210      | 3722152 | PSME3     | -0.47 | 0.23 | -2.01 | 4.40E-02 | 0.17 | case    |
| let_7c       | 3457523 | RNF41     | 0.54  | 0.27 | 2.01  | 4.50E-02 | 0.17 | control |

|              |         |           |       |      |       |          |      |         |
|--------------|---------|-----------|-------|------|-------|----------|------|---------|
| miR_1275     | 3016380 | CUX1      | -0.71 | 0.36 | -2.01 | 4.50E-02 | 0.17 | case    |
| miR_106a_5p  | 2396537 | MTOR      | -0.47 | 0.24 | -2.01 | 4.50E-02 | 0.17 | case    |
| miR_197_3p   | 3190558 | SPTAN1    | -0.54 | 0.27 | -2.01 | 4.50E-02 | 0.17 | case    |
| miR_106a_5p  | 3203482 | BAG1      | -0.37 | 0.18 | -2.01 | 4.50E-02 | 0.17 | control |
| let_7g_5p    | 2411228 | STIL      | -0.37 | 0.18 | -2    | 4.50E-02 | 0.17 | control |
| miR_1275     | 3840224 | ZNF528    | 0.39  | 0.19 | 2     | 4.50E-02 | 0.17 | case    |
| miR_222_3p   | 2662331 | CAMK1     | -0.52 | 0.26 | -2    | 4.50E-02 | 0.17 | case    |
| miR_181a_5p  | 3936442 | PEX26     | 0.97  | 0.48 | 2     | 4.50E-02 | 0.17 | control |
| miR_501_3p   | 3553872 | KLC1      | 0.67  | 0.33 | 2     | 4.50E-02 | 0.17 | control |
| miR_197_3p   | 3259836 | ZDHHC16   | -0.75 | 0.38 | -2    | 4.50E-02 | 0.17 | case    |
| miR_106a_5p  | 2946681 | HIST1H2BJ | -0.45 | 0.22 | -2    | 4.50E-02 | 0.17 | control |
| miR_532_5p   | 2995254 | C7orf41   | -0.45 | 0.22 | -2    | 4.50E-02 | 0.17 | control |
| miR_17_5p    | 3820758 | DNM2      | -0.52 | 0.26 | -2    | 4.50E-02 | 0.17 | case    |
| miR_1275     | 3961955 | PHF5A     | -0.44 | 0.22 | -2    | 4.50E-02 | 0.17 | control |
| miR_27a_3p   | 2963784 | AKIRIN2   | -0.61 | 0.3  | -2    | 4.50E-02 | 0.17 | control |
| miR_29c_3p   | 2832081 | ZMAT2     | -0.31 | 0.16 | -2    | 4.50E-02 | 0.17 | control |
| miR_222_3p   | 4007643 | OTUD5     | -0.51 | 0.25 | -2    | 4.50E-02 | 0.17 | case    |
| miR_148a_3p  | 3168508 | MELK      | -0.32 | 0.16 | -2    | 4.50E-02 | 0.17 | control |
| miR_16_1_3p  | 2562605 | POLR1A    | -0.84 | 0.42 | -2    | 4.50E-02 | 0.17 | case    |
| miR_29a_5p   | 3759305 | CCDC43    | -0.95 | 0.48 | -2    | 4.50E-02 | 0.17 | control |
| miR_744_5p   | 4019486 | 6-Sep     | -0.57 | 0.28 | -2    | 4.50E-02 | 0.17 | case    |
| miR_193a_5p  | 2766788 | RBM47     | -0.49 | 0.24 | -2    | 4.50E-02 | 0.17 | control |
| miR_590_5p   | 2353881 | MAN1A2    | -0.19 | 0.1  | -2    | 4.50E-02 | 0.17 | control |
| miR_17_5p    | 3908631 | PREX1     | -0.4  | 0.2  | -2    | 4.50E-02 | 0.17 | case    |
| miR_590_5p   | 3105904 | CPNE3     | -0.24 | 0.12 | -2    | 4.50E-02 | 0.17 | control |
| miR_221_3p   | 3936887 | MRPL40    | 0.58  | 0.29 | 2     | 4.50E-02 | 0.17 | control |
| miR_106b_5p  | 2591837 | SLC40A1   | -0.42 | 0.21 | -2    | 4.50E-02 | 0.17 | control |
| miR_27a_5p   | 2709235 | DGKG      | 0.67  | 0.34 | 2     | 4.50E-02 | 0.17 | control |
| miR_200c_3p  | 3747199 | CENPV     | -0.49 | 0.25 | -2    | 4.50E-02 | 0.17 | case    |
| miR_106b_5p  | 2831209 | PAIP2     | -0.5  | 0.25 | -2    | 4.50E-02 | 0.17 | control |
| miR_941      | 3248897 | NRBF2     | -0.63 | 0.31 | -2    | 4.60E-02 | 0.17 | control |
| miR_629_5p   | 3833291 | PSMC4     | -0.63 | 0.32 | -2    | 4.60E-02 | 0.17 | case    |
| miR_1254     | 3855968 | ZNF506    | 0.86  | 0.43 | 2     | 4.60E-02 | 0.17 | control |
| miR_210      | 3656223 | ITGAL     | -0.34 | 0.17 | -2    | 4.60E-02 | 0.17 | case    |
| miR_196b_5p  | 2927873 | CCDC28A   | -0.48 | 0.24 | -2    | 4.60E-02 | 0.17 | control |
| miR_1275     | 3341155 | CAPN5     | -0.63 | 0.32 | -2    | 4.60E-02 | 0.17 | case    |
| miR_17_5p    | 3751184 | PHF12     | -0.5  | 0.25 | -2    | 4.60E-02 | 0.17 | case    |
| miR_29b_2_5p | 3952637 | HIRA      | -0.79 | 0.39 | -2    | 4.60E-02 | 0.17 | case    |

|             |         |              |       |      |       |          |      |         |
|-------------|---------|--------------|-------|------|-------|----------|------|---------|
| miR_423_5p  | 3824103 | USE1         | -0.69 | 0.34 | -2    | 4.60E-02 | 0.17 | case    |
| miR_625_3p  | 3888217 | DDX27        | 0.48  | 0.24 | 2     | 4.60E-02 | 0.17 | control |
| miR_145_5p  | 3281762 | ENKUR        | 0.23  | 0.12 | 2     | 4.60E-02 | 0.17 | case    |
| miR_25_5p   | 2450345 | KIF14        | -0.44 | 0.22 | -2    | 4.60E-02 | 0.17 | control |
| miR_210     | 3720636 | PSMD3        | -0.63 | 0.32 | -2    | 4.60E-02 | 0.17 | case    |
| miR_20a_5p  | 3309602 | RGS10        | -0.34 | 0.17 | -2    | 4.60E-02 | 0.17 | control |
| miR_148a_3p | 3163728 | CNTLN        | -0.24 | 0.12 | -2    | 4.60E-02 | 0.17 | control |
| miR_139_3p  | 3018375 | PRKAR2B      | -0.24 | 0.12 | -2    | 4.60E-02 | 0.17 | control |
| miR_16_1_3p | 2732273 | 11-Sep       | -0.49 | 0.25 | -1.99 | 4.60E-02 | 0.17 | control |
| miR_744_5p  | 2971801 | MAN1A1       | -0.6  | 0.3  | -1.99 | 4.60E-02 | 0.17 | control |
| miR_193a_5p | 3894765 | SIRPG        | -0.44 | 0.22 | -1.99 | 4.60E-02 | 0.17 | case    |
| miR_197_3p  | 3281762 | ENKUR        | 0.3   | 0.15 | 1.99  | 4.60E-02 | 0.17 | case    |
| miR_197_3p  | 3417075 | DGKA         | -0.69 | 0.34 | -1.99 | 4.60E-02 | 0.17 | case    |
| miR_210     | 2881747 | ANXA6        | -0.31 | 0.16 | -1.99 | 4.60E-02 | 0.17 | case    |
| miR_590_5p  | 2936564 | FGFR1OP      | -0.26 | 0.13 | -1.99 | 4.70E-02 | 0.17 | control |
| miR_106a_5p | 2682436 | RYBP         | -0.4  | 0.2  | -1.99 | 4.70E-02 | 0.17 | control |
| let_7c      | 3082590 | LOC286161    | 0.26  | 0.13 | 1.99  | 4.70E-02 | 0.17 | case    |
| miR_197_3p  | 3181728 | TGFBR1       | 0.58  | 0.29 | 1.99  | 4.70E-02 | 0.17 | case    |
| miR_197_3p  | 3432138 | MAPKAPK5     | -0.74 | 0.37 | -1.99 | 4.70E-02 | 0.17 | case    |
| miR_766_3p  | 2914693 | SH3BGRL2     | 0.28  | 0.14 | 1.99  | 4.70E-02 | 0.17 | case    |
| miR_197_3p  | 3806905 | SMAD2        | 0.4   | 0.2  | 1.99  | 4.70E-02 | 0.17 | case    |
| miR_93_5p   | 2730673 | MOBK1A       | -0.31 | 0.15 | -1.99 | 4.70E-02 | 0.17 | control |
| miR_181a_5p | 2520069 | C2orf88      | -0.3  | 0.15 | -1.99 | 4.70E-02 | 0.17 | control |
| miR_590_5p  | 2602901 | TRIP12       | -0.22 | 0.11 | -1.99 | 4.70E-02 | 0.17 | control |
| miR_301a_3p | 3682445 | XYLT1        | -0.54 | 0.27 | -1.99 | 4.70E-02 | 0.17 | case    |
| miR_195_5p  | 3003384 | DKFZp434L192 | 0.29  | 0.15 | 1.99  | 4.70E-02 | 0.17 | control |
| miR_590_5p  | 2916952 | CASP8AP2     | -0.21 | 0.11 | -1.99 | 4.70E-02 | 0.17 | control |
| miR_590_5p  | 3464912 | POC1B        | -0.14 | 0.07 | -1.99 | 4.70E-02 | 0.17 | control |
| miR_103a_3p | 3591365 | ADAL         | -0.37 | 0.19 | -1.99 | 4.70E-02 | 0.17 | control |
| miR_93_5p   | 3089285 | POLR3D       | -0.5  | 0.25 | -1.99 | 4.70E-02 | 0.17 | case    |
| miR_106b_5p | 2562821 | VPS24        | -0.46 | 0.23 | -1.99 | 4.70E-02 | 0.17 | control |
| miR_629_5p  | 3476741 | UBC          | -0.82 | 0.41 | -1.99 | 4.70E-02 | 0.17 | case    |
| miR_301a_3p | 3736087 | TNRC6C       | -0.44 | 0.22 | -1.99 | 4.70E-02 | 0.17 | case    |
| miR_155_5p  | 3477967 |              | -0.34 | 0.17 | -1.99 | 4.70E-02 | 0.17 | case    |
| miR_210     | 3043264 | JAZF1        | -0.26 | 0.13 | -1.99 | 4.70E-02 | 0.17 | control |
| miR_31_5p   | 3985534 | NGFRAP1      | 0.33  | 0.17 | 1.99  | 4.70E-02 | 0.17 | case    |
| miR_93_5p   | 2447454 | ARPC5        | -1.11 | 0.56 | -1.99 | 4.70E-02 | 0.17 | control |
| miR_196b_5p | 3053380 | ERV3         | -0.24 | 0.12 | -1.98 | 4.70E-02 | 0.17 | control |

|              |         |          |       |      |       |          |      |         |
|--------------|---------|----------|-------|------|-------|----------|------|---------|
| miR_31_5p    | 2830861 | EGR1     | -0.73 | 0.37 | -1.98 | 4.70E-02 | 0.17 | case    |
| miR_7_1_3p   | 3770606 | HN1      | -0.35 | 0.18 | -1.98 | 4.70E-02 | 0.17 | control |
| miR_181a_5p  | 3589410 | C15orf54 | -0.23 | 0.11 | -1.98 | 4.70E-02 | 0.17 | control |
| miR_505_5p   | 3020804 | NAA38    | 0.28  | 0.14 | 1.98  | 4.70E-02 | 0.17 | case    |
| miR_197_3p   | 3035990 | CARD11   | -0.87 | 0.44 | -1.98 | 4.70E-02 | 0.17 | case    |
| miR_500a_3p  | 2459616 | HIST3H2A | -0.78 | 0.39 | -1.98 | 4.70E-02 | 0.17 | control |
| let_7d_5p    | 2450345 | KIF14    | -0.51 | 0.26 | -1.98 | 4.70E-02 | 0.17 | control |
| miR_106a_5p  | 3464912 | POC1B    | -0.26 | 0.13 | -1.98 | 4.70E-02 | 0.17 | control |
| miR_301a_3p  | 3394123 | HYOU1    | -0.51 | 0.26 | -1.98 | 4.70E-02 | 0.17 | case    |
| miR_29b_2_5p | 3565663 | DLGAP5   | -0.43 | 0.22 | -1.98 | 4.70E-02 | 0.17 | control |
| let_7b_5p    | 3874584 |          | 0.22  | 0.11 | 1.98  | 4.70E-02 | 0.17 | case    |
| miR_671_3p   | 2553576 | RTN4     | -1.34 | 0.68 | -1.98 | 4.70E-02 | 0.17 | control |
| let_7c       | 3634811 | CTSH     | 0.39  | 0.2  | 1.98  | 4.70E-02 | 0.17 | control |
| let_7b_5p    | 3931112 | HLCS     | -0.56 | 0.28 | -1.98 | 4.70E-02 | 0.17 | case    |
| miR_590_5p   | 3026599 | TRIM24   | -0.29 | 0.15 | -1.98 | 4.70E-02 | 0.17 | control |
| miR_196b_5p  | 2732942 | BMP2K    | -0.51 | 0.26 | -1.98 | 4.70E-02 | 0.17 | control |
| miR_148b_5p  | 3883971 | C20orf24 | -0.59 | 0.3  | -1.98 | 4.80E-02 | 0.17 | control |
| miR_197_3p   | 3916576 | GABPA    | 0.32  | 0.16 | 1.98  | 4.80E-02 | 0.17 | case    |
| miR_29b_2_5p | 3737274 | RNF213   | -0.35 | 0.18 | -1.98 | 4.80E-02 | 0.17 | case    |
| miR_155_5p   | 3923354 | AGPAT3   | -0.73 | 0.37 | -1.98 | 4.80E-02 | 0.17 | case    |
| miR_181a_5p  | 3428268 | GAS2L3   | -0.38 | 0.19 | -1.98 | 4.80E-02 | 0.17 | control |
| miR_93_5p    | 3053691 | GUSB     | -0.49 | 0.25 | -1.98 | 4.80E-02 | 0.17 | case    |
| miR_181a_5p  | 3852880 | EMR2     | -0.42 | 0.21 | -1.98 | 4.80E-02 | 0.17 | case    |
| miR_629_5p   | 3852529 | PRKACA   | -0.66 | 0.33 | -1.98 | 4.80E-02 | 0.17 | case    |
| miR_16_1_3p  | 3820921 | SMARCA4  | -0.56 | 0.28 | -1.98 | 4.80E-02 | 0.17 | case    |
| miR_590_5p   | 2682436 | RYBP     | -0.21 | 0.11 | -1.98 | 4.80E-02 | 0.17 | control |
| miR_181a_5p  | 2624291 | PRKCD    | -0.49 | 0.25 | -1.98 | 4.80E-02 | 0.17 | case    |
| miR_616_3p   | 3075778 | HIPK2    | -0.62 | 0.31 | -1.98 | 4.80E-02 | 0.17 | case    |
| miR_20b_5p   | 2587618 | OLA1     | -0.5  | 0.25 | -1.98 | 4.80E-02 | 0.17 | control |
| miR_590_5p   | 2659918 | LRCH3    | -0.24 | 0.12 | -1.98 | 4.80E-02 | 0.17 | control |
| miR_139_3p   | 3188111 | PTGS1    | -0.42 | 0.21 | -1.98 | 4.80E-02 | 0.17 | control |
| miR_345_5p   | 2324416 | ALPL     | -0.4  | 0.2  | -1.98 | 4.80E-02 | 0.17 | control |
| let_7d_3p    | 3175597 | VPS13A   | 0.21  | 0.11 | 1.98  | 4.80E-02 | 0.17 | control |
| miR_93_5p    | 3608220 | CRTC3    | -0.53 | 0.27 | -1.98 | 4.80E-02 | 0.17 | case    |
| miR_150_5p   | 2458513 | TMEM63A  | -0.98 | 0.5  | -1.98 | 4.80E-02 | 0.17 | control |
| miR_16_1_3p  | 2825629 | TNFAIP8  | -0.59 | 0.3  | -1.98 | 4.80E-02 | 0.17 | control |
| miR_1275     | 3665357 | TMEM208  | -0.42 | 0.21 | -1.98 | 4.80E-02 | 0.17 | control |
| miR_196b_5p  | 3095719 | GOLGA7   | -0.57 | 0.29 | -1.98 | 4.80E-02 | 0.17 | control |

|              |         |           |       |      |       |          |      |         |
|--------------|---------|-----------|-------|------|-------|----------|------|---------|
| miR_222_3p   | 3723264 | NMT1      | -0.38 | 0.19 | -1.98 | 4.80E-02 | 0.17 | case    |
| miR_152      | 3965314 | BRD1      | -0.88 | 0.44 | -1.98 | 4.80E-02 | 0.17 | case    |
| miR_92a_3p   | 3107234 | C8orf39   | -0.94 | 0.48 | -1.97 | 4.80E-02 | 0.17 | control |
| miR_144_5p   | 3573994 | C14orf145 | -0.19 | 0.1  | -1.97 | 4.80E-02 | 0.17 | control |
| miR_193a_5p  | 3075778 | HIPK2     | -0.6  | 0.31 | -1.97 | 4.80E-02 | 0.17 | case    |
| miR_590_5p   | 3359469 | NAP1L4    | -0.22 | 0.11 | -1.97 | 4.80E-02 | 0.17 | control |
| miR_148a_3p  | 3563395 | POLE2     | -0.25 | 0.13 | -1.97 | 4.80E-02 | 0.17 | control |
| miR_148b_5p  | 3414846 | DAZAP2    | -0.69 | 0.35 | -1.97 | 4.80E-02 | 0.17 | control |
| miR_100_5p   | 2894711 | TMEM14B   | -0.14 | 0.07 | -1.97 | 4.90E-02 | 0.17 | control |
| miR_150_5p   | 2970942 | COL10A1   | 1.27  | 0.64 | 1.97  | 4.90E-02 | 0.17 | case    |
| miR_210      | 3853299 | AKAP8     | -0.62 | 0.31 | -1.97 | 4.90E-02 | 0.17 | case    |
| miR_106a_5p  | 2995254 | C7orf41   | -0.4  | 0.2  | -1.97 | 4.90E-02 | 0.17 | control |
| miR_29b_2_5p | 3504617 | SKA3      | -0.33 | 0.17 | -1.97 | 4.90E-02 | 0.17 | control |
| miR_181a_5p  | 2559967 | DCTN1     | -0.75 | 0.38 | -1.97 | 4.90E-02 | 0.17 | case    |
| miR_106b_5p  | 3788976 | RAB27B    | -0.29 | 0.15 | -1.97 | 4.90E-02 | 0.17 | control |
| miR_210      | 2609960 | TLL3      | -0.65 | 0.33 | -1.97 | 4.90E-02 | 0.17 | case    |
| miR_196b_5p  | 3784509 | ZNF271    | -0.36 | 0.18 | -1.97 | 4.90E-02 | 0.17 | control |
| miR_210      | 3870824 | LAIR1     | -0.55 | 0.28 | -1.97 | 4.90E-02 | 0.17 | case    |
| miR_181a_5p  | 2783596 | PDE5A     | -0.5  | 0.25 | -1.97 | 4.90E-02 | 0.18 | control |
| miR_181a_5p  | 2450345 | KIF14     | -0.47 | 0.24 | -1.97 | 4.90E-02 | 0.18 | control |
| miR_425_3p   | 3834176 | TMEM91    | -0.51 | 0.26 | -1.97 | 4.90E-02 | 0.18 | control |
| miR_29c_3p   | 2594812 | TRAK2     | -0.22 | 0.11 | -1.96 | 4.90E-02 | 0.18 | control |
| miR_301a_3p  | 3718401 | LIG3      | -0.52 | 0.27 | -1.96 | 5.00E-02 | 0.18 | case    |
| miR_1275     | 3893072 | C20orf11  | -0.3  | 0.15 | -1.96 | 5.00E-02 | 0.18 | case    |
| miR_150_5p   | 3998766 | KAL1      | -1.67 | 0.85 | -1.96 | 5.00E-02 | 0.18 | case    |
| miR_128      | 3749767 | TMEM11    | -0.68 | 0.35 | -1.96 | 5.00E-02 | 0.18 | control |
| miR_210      | 3351806 | VPS11     | -0.41 | 0.21 | -1.96 | 5.00E-02 | 0.18 | case    |
| let_7b_5p    | 3732793 | ARSG      | 0.49  | 0.25 | 1.96  | 5.00E-02 | 0.18 | control |
| miR_301a_3p  | 2363808 | FCGR2B    | -0.35 | 0.18 | -1.96 | 5.00E-02 | 0.18 | case    |
| miR_222_3p   | 2730673 | MOBK1A    | -0.26 | 0.13 | -1.96 | 5.00E-02 | 0.18 | control |
| let_7b_5p    | 2607110 | HDLBP     | -0.38 | 0.19 | -1.96 | 5.00E-02 | 0.18 | case    |
| miR_484      | 3909247 | FAM65C    | 2.06  | 1.05 | 1.96  | 5.00E-02 | 0.18 | control |
| let_7c       | 2904270 | UHRF1BP1  | 0.76  | 0.39 | 1.96  | 5.00E-02 | 0.18 | control |
| miR_221_3p   | 2363084 | NCSTN     | -0.6  | 0.31 | -1.96 | 5.00E-02 | 0.18 | case    |
| miR_181a_5p  | 3074640 | LUZP6     | -0.81 | 0.41 | -1.96 | 5.00E-02 | 0.18 | control |
| miR_301a_3p  | 2399409 | UBR4      | -0.34 | 0.18 | -1.96 | 5.00E-02 | 0.18 | case    |
| miR_193a_5p  | 3423184 | ZDHC17    | 0.4   | 0.2  | 1.96  | 5.00E-02 | 0.18 | case    |
| miR_20b_5p   | 3066818 | NAMPT     | -0.41 | 0.21 | -1.96 | 5.00E-02 | 0.18 | control |

|             |         |           |       |      |       |          |      |         |
|-------------|---------|-----------|-------|------|-------|----------|------|---------|
| miR_660_5p  | 2708922 | IGF2BP2   | -0.29 | 0.15 | -1.96 | 5.00E-02 | 0.18 | control |
| miR_885_5p  | 2903285 | PSMB9     | -0.65 | 0.33 | -1.96 | 5.00E-02 | 0.18 | control |
| let_7c      | 3770699 | MIF4GD    | 0.6   | 0.3  | 1.96  | 5.00E-02 | 0.18 | control |
| miR_1275    | 2778980 | EIF4E     | 0.18  | 0.09 | 1.96  | 5.00E-02 | 0.18 | case    |
| miR_221_3p  | 2893562 | RREB1     | -0.94 | 0.48 | -1.96 | 5.00E-02 | 0.18 | case    |
| miR_155_5p  | 2400518 | ECE1      | -0.36 | 0.18 | -1.96 | 5.00E-02 | 0.18 | case    |
| miR_374b_5p | 3394092 | SLC37A4   | 0.72  | 0.37 | 1.96  | 5.00E-02 | 0.18 | case    |
| miR_590_5p  | 2874794 | RAPGEF6   | -0.23 | 0.12 | -1.96 | 5.00E-02 | 0.18 | control |
| miR_106a_5p | 2620256 | KIF15     | -0.41 | 0.21 | -1.96 | 5.00E-02 | 0.18 | control |
| miR_17_5p   | 3304215 | LDB1      | -0.48 | 0.24 | -1.96 | 5.00E-02 | 0.18 | case    |
| miR_29c_3p  | 2618598 | EIF1B     | -0.27 | 0.14 | -1.96 | 5.00E-02 | 0.18 | control |
| miR_93_5p   | 3091301 | PTK2B     | -0.51 | 0.26 | -1.96 | 5.00E-02 | 0.18 | case    |
| miR_25_5p   | 2406420 | CLSPN     | -0.5  | 0.26 | -1.96 | 5.00E-02 | 0.18 | control |
| let_7c      | 2863964 | ARSB      | -0.67 | 0.34 | -1.96 | 5.00E-02 | 0.18 | case    |
| miR_106b_5p | 2783596 | PDE5A     | -0.48 | 0.25 | -1.96 | 5.00E-02 | 0.18 | control |
| miR_1275    | 4051226 | SEMA4D    | -0.5  | 0.26 | -1.95 | 5.10E-02 | 0.18 | case    |
| miR_181a_5p | 2730673 | MOBK1A    | -0.32 | 0.16 | -1.95 | 5.10E-02 | 0.18 | control |
| miR_210     | 3758928 | C17orf65  | -0.36 | 0.18 | -1.95 | 5.10E-02 | 0.18 | case    |
| miR_106a_5p | 3352503 | ARHGEF12  | -0.23 | 0.12 | -1.95 | 5.10E-02 | 0.18 | control |
| miR_93_5p   | 2539607 | MBOAT2    | -0.34 | 0.17 | -1.95 | 5.10E-02 | 0.18 | control |
| miR_320a    | 2408189 | PPT1      | -0.46 | 0.23 | -1.95 | 5.10E-02 | 0.18 | case    |
| miR_148b_5p | 2359664 | S100A9    | -0.4  | 0.21 | -1.95 | 5.10E-02 | 0.18 | control |
| miR_103a_3p | 3020444 | CAPZA2    | -0.38 | 0.19 | -1.95 | 5.10E-02 | 0.18 | control |
| miR_454_3p  | 3569441 | ZFYVE26   | -0.55 | 0.28 | -1.95 | 5.10E-02 | 0.18 | case    |
| miR_25_5p   | 3151534 | ATAD2     | -0.42 | 0.22 | -1.95 | 5.10E-02 | 0.18 | control |
| miR_27a_5p  | 3261952 | C10orf32  | -0.39 | 0.2  | -1.95 | 5.10E-02 | 0.18 | control |
| miR_301a_3p | 2887048 | STK10     | -0.4  | 0.2  | -1.95 | 5.10E-02 | 0.18 | case    |
| miR_454_3p  | 3965314 | BRD1      | -0.61 | 0.31 | -1.95 | 5.10E-02 | 0.18 | case    |
| miR_126_3p  | 2793401 | MFAP3L    | -0.38 | 0.19 | -1.95 | 5.10E-02 | 0.18 | control |
| let_7b_5p   | 2411228 | STIL      | -0.3  | 0.15 | -1.95 | 5.10E-02 | 0.18 | control |
| miR_148b_5p | 3441849 | TNFRSF1A  | -0.53 | 0.27 | -1.95 | 5.10E-02 | 0.18 | control |
| miR_210     | 2887048 | STK10     | -0.38 | 0.2  | -1.95 | 5.10E-02 | 0.18 | case    |
| miR_454_3p  | 3818732 | ARHGEF18  | -0.45 | 0.23 | -1.95 | 5.10E-02 | 0.18 | case    |
| let_7c      | 3934245 | CSTB      | -0.7  | 0.36 | -1.95 | 5.10E-02 | 0.18 | case    |
| let_7b_5p   | 3135452 | ATP6V1H   | 0.49  | 0.25 | 1.95  | 5.10E-02 | 0.18 | control |
| miR_181a_5p | 3770361 | CD300LF   | -0.54 | 0.28 | -1.95 | 5.10E-02 | 0.18 | case    |
| let_7c      | 2899152 | HIST1H2AC | 0.4   | 0.21 | 1.95  | 5.20E-02 | 0.18 | case    |
| miR_629_5p  | 3820921 | SMARCA4   | -0.57 | 0.3  | -1.95 | 5.20E-02 | 0.18 | case    |



|              |         |         |       |      |       |          |      |         |
|--------------|---------|---------|-------|------|-------|----------|------|---------|
| miR_210      | 3231846 | WDR37   | -0.54 | 0.28 | -1.95 | 5.20E-02 | 0.18 | case    |
| miR_29b_2_5p | 2773369 | CXCL5   | -0.63 | 0.32 | -1.95 | 5.20E-02 | 0.18 | control |
| miR_93_5p    | 3239380 | THNSL1  | 0.4   | 0.21 | 1.95  | 5.20E-02 | 0.18 | case    |
| miR_301a_3p  | 2351171 | FAM40A  | -0.62 | 0.32 | -1.95 | 5.20E-02 | 0.18 | case    |
| miR_502_5p   | 3361381 | CYB5R2  | -0.81 | 0.42 | -1.94 | 5.20E-02 | 0.18 | control |
| miR_106a_5p  | 3309602 | RGS10   | -0.36 | 0.19 | -1.94 | 5.20E-02 | 0.18 | control |
| let_7d_3p    | 3714177 | SPECC1  | 0.23  | 0.12 | 1.94  | 5.20E-02 | 0.18 | control |
| miR_590_5p   | 2930592 | TAB2    | -0.18 | 0.09 | -1.94 | 5.20E-02 | 0.18 | control |
| miR_181a_5p  | 3787076 | RNF165  | -0.35 | 0.18 | -1.94 | 5.20E-02 | 0.18 | case    |
| miR_590_5p   | 2726483 | OCIAD1  | -0.24 | 0.13 | -1.94 | 5.20E-02 | 0.18 | control |
| miR_628_3p   | 7385696 | SHFM1   | 0.43  | 0.22 | 1.94  | 5.20E-02 | 0.18 | case    |
| miR_301a_3p  | 2334319 | TOE1    | -0.6  | 0.31 | -1.94 | 5.20E-02 | 0.18 | case    |
| miR_197_3p   | 2545750 | EIF2B4  | -0.87 | 0.45 | -1.94 | 5.20E-02 | 0.18 | case    |
| miR_370      | 2591837 | SLC40A1 | -0.36 | 0.19 | -1.94 | 5.20E-02 | 0.18 | control |
| miR_221_3p   | 2730673 | MOBK1A  | -0.31 | 0.16 | -1.94 | 5.20E-02 | 0.18 | control |
| miR_301a_3p  | 3442205 | ZNF384  | -0.51 | 0.26 | -1.94 | 5.20E-02 | 0.18 | case    |
| miR_106b_5p  | 2766532 | UBE2K   | -0.59 | 0.3  | -1.94 | 5.20E-02 | 0.18 | control |
| miR_181a_5p  | 2522616 | CFLAR   | -0.55 | 0.28 | -1.94 | 5.20E-02 | 0.18 | case    |
| miR_25_5p    | 3414695 | ATF1    | -0.36 | 0.18 | -1.94 | 5.30E-02 | 0.18 | control |
| miR_301a_3p  | 3552847 | DYNC1H1 | -0.32 | 0.16 | -1.94 | 5.30E-02 | 0.18 | case    |
| miR_181a_5p  | 3908831 | ZNFX1   | -0.38 | 0.2  | -1.94 | 5.30E-02 | 0.18 | case    |
| miR_106a_5p  | 3961496 | MKL1    | -0.55 | 0.28 | -1.94 | 5.30E-02 | 0.18 | case    |
| miR_181a_5p  | 3087501 | ZDHH2   | -0.35 | 0.18 | -1.94 | 5.30E-02 | 0.18 | control |
| miR_210      | 3759356 | EFTUD2  | -0.36 | 0.18 | -1.94 | 5.30E-02 | 0.18 | case    |
| miR_671_3p   | 2363562 | FCER1G  | -0.53 | 0.28 | -1.94 | 5.30E-02 | 0.18 | control |
| miR_210      | 3022465 | SND1    | -0.41 | 0.21 | -1.94 | 5.30E-02 | 0.18 | case    |
| miR_130a_3p  | 2450345 | KIF14   | -0.44 | 0.22 | -1.94 | 5.30E-02 | 0.18 | control |
| miR_181a_5p  | 3757840 | STAT3   | -0.4  | 0.21 | -1.94 | 5.30E-02 | 0.18 | case    |
| miR_766_3p   | 3763270 | MMD     | 0.26  | 0.13 | 1.94  | 5.30E-02 | 0.18 | case    |
| miR_150_5p   | 3107234 | C8orf39 | -0.71 | 0.37 | -1.94 | 5.30E-02 | 0.18 | control |
| let_7b_5p    | 2752725 | NEIL3   | -0.26 | 0.13 | -1.94 | 5.30E-02 | 0.18 | control |
| miR_197_3p   | 3874584 |         | 0.23  | 0.12 | 1.94  | 5.30E-02 | 0.18 | case    |
| miR_1275     | 2320048 | TARDBP  | 0.4   | 0.21 | 1.94  | 5.30E-02 | 0.18 | case    |
| miR_106b_5p  | 3464912 | POC1B   | -0.26 | 0.13 | -1.94 | 5.30E-02 | 0.18 | control |
| miR_210      | 3332729 | CD5     | -0.35 | 0.18 | -1.94 | 5.30E-02 | 0.18 | case    |
| miR_139_3p   | 3095719 | GOLGA7  | -0.52 | 0.27 | -1.93 | 5.30E-02 | 0.18 | control |
| miR_197_3p   | 3140763 | UBE2W   | 0.45  | 0.23 | 1.93  | 5.30E-02 | 0.18 | case    |
| miR_197_3p   | 3833040 | SUPT5H  | -0.84 | 0.43 | -1.93 | 5.30E-02 | 0.18 | case    |

|             |         |          |       |      |       |          |      |         |
|-------------|---------|----------|-------|------|-------|----------|------|---------|
| miR_196b_5p | 3100909 | YTHDF3   | -0.49 | 0.25 | -1.93 | 5.30E-02 | 0.18 | control |
| miR_144_5p  | 2620538 | LARS2    | -0.37 | 0.19 | -1.93 | 5.30E-02 | 0.18 | case    |
| miR_744_5p  | 3572278 | NEK9     | -0.77 | 0.4  | -1.93 | 5.30E-02 | 0.18 | case    |
| miR_106b_5p | 2650199 | SMC4     | -0.38 | 0.2  | -1.93 | 5.30E-02 | 0.18 | control |
| miR_106b_3p | 3664785 | CKLF     | 0.35  | 0.18 | 1.93  | 5.30E-02 | 0.18 | case    |
| miR_193a_5p | 4021633 | ENOX2    | 0.5   | 0.26 | 1.93  | 5.30E-02 | 0.18 | control |
| miR_629_3p  | 3881824 | KIF3B    | 0.77  | 0.4  | 1.93  | 5.30E-02 | 0.18 | control |
| miR_652_3p  | 3074640 | LUZP6    | -0.96 | 0.5  | -1.93 | 5.30E-02 | 0.18 | control |
| miR_590_5p  | 2335132 | CMPK1    | -0.2  | 0.1  | -1.93 | 5.30E-02 | 0.18 | control |
| miR_181a_5p | 3075566 | ZC3HAV1  | -0.53 | 0.28 | -1.93 | 5.30E-02 | 0.18 | case    |
| miR_301a_3p | 2591421 | TFPI     | -0.4  | 0.21 | -1.93 | 5.30E-02 | 0.18 | control |
| miR_181a_5p | 2403446 | PTAFR    | -0.37 | 0.19 | -1.93 | 5.30E-02 | 0.18 | case    |
| let_7e_5p   | 7385696 | SHFM1    | 0.39  | 0.2  | 1.93  | 5.40E-02 | 0.18 | case    |
| miR_181a_5p | 3053691 | GUSB     | -0.48 | 0.25 | -1.93 | 5.40E-02 | 0.18 | case    |
| miR_1275    | 3226253 | FAM102A  | -0.34 | 0.18 | -1.93 | 5.40E-02 | 0.18 | control |
| miR_106b_5p | 2942504 | RANBP9   | -0.38 | 0.19 | -1.93 | 5.40E-02 | 0.18 | control |
| miR_1275    | 4007437 | SLC38A5  | -0.33 | 0.17 | -1.93 | 5.40E-02 | 0.18 | case    |
| miR_106a_5p | 2372211 | PLA2G4A  | -0.49 | 0.25 | -1.93 | 5.40E-02 | 0.18 | control |
| miR_20b_5p  | 2775858 | LIN54    | -0.54 | 0.28 | -1.93 | 5.40E-02 | 0.18 | control |
| miR_196b_5p | 2318637 | VAMP3    | -0.62 | 0.32 | -1.93 | 5.40E-02 | 0.18 | control |
| miR_432_5p  | 3976609 | FTSJ1    | 5.82  | 3.02 | 1.93  | 5.40E-02 | 0.18 | control |
| miR_106b_5p | 2698565 | TFDP2    | -0.28 | 0.15 | -1.93 | 5.40E-02 | 0.18 | control |
| miR_106b_5p | 3591365 | ADAL     | -0.3  | 0.16 | -1.93 | 5.40E-02 | 0.18 | control |
| miR_505_5p  | 3617403 | NOPI0    | 0.33  | 0.17 | 1.93  | 5.40E-02 | 0.18 | case    |
| miR_93_5p   | 2438657 | ARHGEF11 | -0.68 | 0.35 | -1.93 | 5.40E-02 | 0.18 | case    |
| miR_590_5p  | 2726323 | SLAIN2   | -0.26 | 0.13 | -1.93 | 5.40E-02 | 0.18 | control |
| miR_192_5p  | 3090053 | SLC25A37 | -0.33 | 0.17 | -1.93 | 5.40E-02 | 0.18 | control |
| miR_301a_3p | 2596162 | INO80D   | -0.4  | 0.21 | -1.93 | 5.40E-02 | 0.18 | case    |
| miR_616_3p  | 2403301 | RPA2     | -0.55 | 0.29 | -1.93 | 5.40E-02 | 0.18 | case    |
| miR_320a    | 3894765 | SIRPG    | -0.55 | 0.29 | -1.93 | 5.40E-02 | 0.18 | case    |
| miR_210     | 3376155 | NXF1     | -0.42 | 0.22 | -1.92 | 5.40E-02 | 0.18 | case    |
| miR_1275    | 3460127 | GNS      | -0.36 | 0.19 | -1.92 | 5.40E-02 | 0.18 | case    |
| miR_301a_3p | 3089285 | POLR3D   | -0.42 | 0.22 | -1.92 | 5.40E-02 | 0.18 | case    |
| miR_520f    | 3066818 | NAMPT    | -0.3  | 0.15 | -1.92 | 5.40E-02 | 0.18 | control |
| miR_301a_3p | 3453319 | DDX23    | -0.36 | 0.19 | -1.92 | 5.40E-02 | 0.18 | case    |
| miR_744_5p  | 3728097 | AKAP1    | -0.58 | 0.3  | -1.92 | 5.40E-02 | 0.18 | case    |
| miR_20b_5p  | 2741901 | KIAA1109 | -0.23 | 0.12 | -1.92 | 5.40E-02 | 0.18 | control |
| miR_301a_3p | 3375340 | CPSF7    | -0.53 | 0.28 | -1.92 | 5.50E-02 | 0.18 | case    |

|              |         |          |       |      |       |          |      |         |
|--------------|---------|----------|-------|------|-------|----------|------|---------|
| miR_144_5p   | 3155937 | TRAPPC9  | -0.35 | 0.18 | -1.92 | 5.50E-02 | 0.18 | case    |
| miR_93_5p    | 2351171 | FAM40A   | -0.72 | 0.37 | -1.92 | 5.50E-02 | 0.18 | case    |
| miR_155_5p   | 3294854 | CAMK2G   | -0.53 | 0.28 | -1.92 | 5.50E-02 | 0.18 | case    |
| miR_181a_5p  | 3781654 | RIOK3    | -0.33 | 0.17 | -1.92 | 5.50E-02 | 0.18 | control |
| miR_181a_5p  | 2989050 | RAC1     | -0.39 | 0.2  | -1.92 | 5.50E-02 | 0.18 | case    |
| let_7b_5p    | 3435192 | MLXIP    | -0.4  | 0.21 | -1.92 | 5.50E-02 | 0.18 | case    |
| miR_26b_3p   | 2841284 | ATP6V0E1 | -0.89 | 0.46 | -1.92 | 5.50E-02 | 0.18 | control |
| let_7d_3p    | 2594773 | ALS2CR12 | 0.19  | 0.1  | 1.92  | 5.50E-02 | 0.18 | control |
| miR_25_5p    | 2991995 | ABCB5    | -0.64 | 0.33 | -1.92 | 5.50E-02 | 0.18 | control |
| miR_590_5p   | 3105430 | LRRCC1   | -0.19 | 0.1  | -1.92 | 5.50E-02 | 0.18 | control |
| miR_144_5p   | 2406420 | CLSPN    | -0.29 | 0.15 | -1.92 | 5.50E-02 | 0.18 | control |
| miR_183_3p   | 2869096 | SLCO4C1  | -0.34 | 0.18 | -1.92 | 5.50E-02 | 0.18 | control |
| miR_301a_3p  | 2394841 | DNAJC11  | -0.4  | 0.21 | -1.92 | 5.50E-02 | 0.18 | case    |
| let_7g_5p    | 3764738 | SKA2     | 0.28  | 0.15 | 1.92  | 5.50E-02 | 0.18 | case    |
| miR_29b_2_5p | 3594986 | TEX9     | -0.23 | 0.12 | -1.92 | 5.50E-02 | 0.19 | control |
| miR_210      | 3935300 | MCM3AP   | -0.52 | 0.27 | -1.92 | 5.50E-02 | 0.19 | case    |
| miR_106b_5p  | 2347023 | CCDC18   | -0.22 | 0.12 | -1.92 | 5.50E-02 | 0.19 | control |
| miR_720      | 2786322 | SLC7A11  | -0.69 | 0.36 | -1.92 | 5.50E-02 | 0.19 | control |
| miR_106a_5p  | 3105430 | LRRCC1   | -0.38 | 0.2  | -1.92 | 5.50E-02 | 0.19 | control |
| miR_423_5p   | 3724360 | GOSR2    | -0.63 | 0.33 | -1.92 | 5.50E-02 | 0.19 | case    |
| miR_15b_3p   | 3751121 | FLOT2    | -0.34 | 0.18 | -1.92 | 5.50E-02 | 0.19 | control |
| miR_720      | 3970338 | NHS      | -1.02 | 0.53 | -1.92 | 5.50E-02 | 0.19 | control |
| miR_139_3p   | 2995254 | C7orf41  | -0.4  | 0.21 | -1.92 | 5.50E-02 | 0.19 | control |
| miR_29b_2_5p | 3649811 | NDE1     | -0.43 | 0.22 | -1.92 | 5.50E-02 | 0.19 | case    |
| miR_181a_5p  | 3936009 | IL17RA   | -0.47 | 0.25 | -1.92 | 5.50E-02 | 0.19 | case    |
| miR_155_5p   | 3179551 | FGD3     | -0.52 | 0.27 | -1.92 | 5.50E-02 | 0.19 | case    |
| miR_181a_5p  | 3820443 | ICAM1    | -0.58 | 0.31 | -1.92 | 5.50E-02 | 0.19 | case    |
| miR_210      | 3881874 | ASXL1    | -0.61 | 0.32 | -1.91 | 5.60E-02 | 0.19 | case    |
| miR_144_5p   | 3320169 | AMPD3    | -0.37 | 0.19 | -1.91 | 5.60E-02 | 0.19 | case    |
| miR_197_3p   | 3822049 | CALR     | -0.65 | 0.34 | -1.91 | 5.60E-02 | 0.19 | case    |
| let_7b_5p    | 3720739 | CASC3    | -0.43 | 0.22 | -1.91 | 5.60E-02 | 0.19 | case    |
| miR_543      | 2975014 | SGK1     | -0.38 | 0.2  | -1.91 | 5.60E-02 | 0.19 | control |
| miR_744_3p   | 2951730 | SLC26A8  | -0.48 | 0.25 | -1.91 | 5.60E-02 | 0.19 | control |
| let_7d_3p    | 3509677 | C13orf38 | 0.43  | 0.23 | 1.91  | 5.60E-02 | 0.19 | control |
| miR_144_5p   | 3741875 | ZZEF1    | -0.28 | 0.14 | -1.91 | 5.60E-02 | 0.19 | case    |
| let_7c       | 3589410 | C15orf54 | -0.17 | 0.09 | -1.91 | 5.60E-02 | 0.19 | control |
| miR_106b_5p  | 2662491 | TMEM111  | -0.27 | 0.14 | -1.91 | 5.60E-02 | 0.19 | control |
| miR_196b_5p  | 2633256 | ST3GAL6  | -0.44 | 0.23 | -1.91 | 5.60E-02 | 0.19 | control |

|             |         |          |       |      |       |          |      |         |
|-------------|---------|----------|-------|------|-------|----------|------|---------|
| miR_210     | 3442396 | PHB2     | -0.43 | 0.22 | -1.91 | 5.60E-02 | 0.19 | case    |
| let_7c      | 3456313 | ATP5G2   | 0.52  | 0.27 | 1.91  | 5.60E-02 | 0.19 | control |
| miR_210     | 3942062 | NF2      | -0.52 | 0.27 | -1.91 | 5.60E-02 | 0.19 | case    |
| let_7b_5p   | 2881672 | TNIP1    | -0.42 | 0.22 | -1.91 | 5.60E-02 | 0.19 | case    |
| miR_26b_5p  | 3888613 | CEBPB    | -0.47 | 0.25 | -1.91 | 5.60E-02 | 0.19 | control |
| miR_590_5p  | 2404819 | PTP4A2   | -0.21 | 0.11 | -1.91 | 5.60E-02 | 0.19 | control |
| miR_590_5p  | 2347023 | CCDC18   | -0.11 | 0.06 | -1.91 | 5.60E-02 | 0.19 | control |
| miR_210     | 3895232 | UBOX5    | -0.65 | 0.34 | -1.91 | 5.60E-02 | 0.19 | case    |
| miR_487b    | 2346657 | BTBD8    | 0.95  | 0.5  | 1.91  | 5.60E-02 | 0.19 | case    |
| miR_590_5p  | 2793401 | MFAP3L   | -0.21 | 0.11 | -1.91 | 5.60E-02 | 0.19 | control |
| miR_106a_5p | 3364306 | SOX6     | -0.33 | 0.17 | -1.91 | 5.60E-02 | 0.19 | control |
| miR_196b_5p | 3409605 | FAR2     | -0.41 | 0.22 | -1.91 | 5.60E-02 | 0.19 | control |
| miR_301a_3p | 4009315 | HUWE1    | -0.31 | 0.16 | -1.91 | 5.70E-02 | 0.19 | case    |
| miR_660_5p  | 2396009 | LZIC     | -0.4  | 0.21 | -1.91 | 5.70E-02 | 0.19 | control |
| miR_150_5p  | 2855578 | C5orf28  | 0.84  | 0.44 | 1.91  | 5.70E-02 | 0.19 | case    |
| miR_197_3p  | 3229529 | CAMSAP1  | -0.79 | 0.41 | -1.91 | 5.70E-02 | 0.19 | case    |
| miR_139_3p  | 2945645 | TDP2     | -0.37 | 0.19 | -1.91 | 5.70E-02 | 0.19 | control |
| miR_340_5p  | 2675192 | TUSC2    | 0.95  | 0.5  | 1.91  | 5.70E-02 | 0.19 | case    |
| miR_744_5p  | 2922215 | MARCKS   | -1.04 | 0.55 | -1.91 | 5.70E-02 | 0.19 | control |
| miR_106b_5p | 2622435 | RBM6     | 0.56  | 0.29 | 1.91  | 5.70E-02 | 0.19 | control |
| miR_106b_5p | 4027769 | CLIC2    | -0.25 | 0.13 | -1.9  | 5.70E-02 | 0.19 | control |
| miR_210     | 3697125 | COG4     | -0.48 | 0.25 | -1.9  | 5.70E-02 | 0.19 | case    |
| let_7c      | 2484752 | COMMD1   | -0.33 | 0.18 | -1.9  | 5.70E-02 | 0.19 | case    |
| miR_301a_3p | 2358520 | SETDB1   | -0.41 | 0.21 | -1.9  | 5.70E-02 | 0.19 | case    |
| miR_193a_5p | 2623154 | RBM15B   | -0.59 | 0.31 | -1.9  | 5.70E-02 | 0.19 | case    |
| miR_210     | 3793760 | CNDP2    | -0.36 | 0.19 | -1.9  | 5.70E-02 | 0.19 | case    |
| miR_139_5p  | 2841284 | ATP6V0E1 | -0.78 | 0.41 | -1.9  | 5.70E-02 | 0.19 | control |
| miR_150_5p  | 3180957 | HABP4    | 1.03  | 0.54 | 1.9   | 5.70E-02 | 0.19 | case    |
| miR_181a_5p | 3936887 | MRPL40   | 0.57  | 0.3  | 1.9   | 5.70E-02 | 0.19 | control |
| miR_193a_5p | 3385175 | PICALM   | 0.29  | 0.15 | 1.9   | 5.70E-02 | 0.19 | case    |
| let_7b_5p   | 3843386 | ZNF530   | 0.35  | 0.18 | 1.9   | 5.70E-02 | 0.19 | control |
| miR_155_5p  | 3724360 | GOSR2    | -0.52 | 0.27 | -1.9  | 5.70E-02 | 0.19 | case    |
| miR_222_3p  | 2562198 | TGOLN2   | -0.34 | 0.18 | -1.9  | 5.70E-02 | 0.19 | case    |
| miR_193a_5p | 2562198 | TGOLN2   | -0.46 | 0.24 | -1.9  | 5.70E-02 | 0.19 | case    |
| miR_196b_5p | 2682436 | RYBP     | -0.41 | 0.21 | -1.9  | 5.70E-02 | 0.19 | control |
| miR_106b_5p | 2366028 | DCAF6    | -0.27 | 0.14 | -1.9  | 5.70E-02 | 0.19 | control |
| miR_20b_5p  | 2394841 | DNAJC11  | -0.43 | 0.22 | -1.9  | 5.70E-02 | 0.19 | case    |
| miR_590_5p  | 3816778 | GNA11    | 0.36  | 0.19 | 1.9   | 5.70E-02 | 0.19 | control |

|              |         |          |       |      |       |          |      |         |
|--------------|---------|----------|-------|------|-------|----------|------|---------|
| miR_20b_5p   | 2682436 | RYBP     | -0.37 | 0.2  | -1.9  | 5.70E-02 | 0.19 | control |
| miR_181a_5p  | 3336696 | KDM2A    | -0.54 | 0.29 | -1.9  | 5.70E-02 | 0.19 | case    |
| miR_222_3p   | 3168136 | RGP1     | -0.36 | 0.19 | -1.9  | 5.70E-02 | 0.19 | case    |
| miR_29b_2_5p | 3372253 | CELF1    | -0.61 | 0.32 | -1.9  | 5.70E-02 | 0.19 | case    |
| miR_210      | 3414390 | SMARCD1  | -0.57 | 0.3  | -1.9  | 5.70E-02 | 0.19 | case    |
| miR_941      | 3695907 |          | -0.3  | 0.16 | -1.9  | 5.70E-02 | 0.19 | case    |
| miR_628_3p   | 3572235 | MLH3     | 0.45  | 0.23 | 1.9   | 5.70E-02 | 0.19 | case    |
| miR_210      | 3647993 | CIITA    | -0.37 | 0.19 | -1.9  | 5.80E-02 | 0.19 | case    |
| miR_93_5p    | 3825713 | GATAD2A  | -0.53 | 0.28 | -1.9  | 5.80E-02 | 0.19 | case    |
| miR_150_5p   | 3452231 | SLC38A1  | 0.78  | 0.41 | 1.9   | 5.80E-02 | 0.19 | case    |
| miR_339_3p   | 3781654 | RIOK3    | -0.27 | 0.14 | -1.9  | 5.80E-02 | 0.19 | control |
| miR_155_5p   | 3375340 | CPSF7    | -0.6  | 0.31 | -1.9  | 5.80E-02 | 0.19 | case    |
| miR_103a_3p  | 2591837 | SLC40A1  | -0.43 | 0.22 | -1.9  | 5.80E-02 | 0.19 | control |
| miR_17_5p    | 2950629 | TAPBP    | -0.53 | 0.28 | -1.9  | 5.80E-02 | 0.19 | case    |
| miR_146a_5p  | 2591837 | SLC40A1  | -0.4  | 0.21 | -1.9  | 5.80E-02 | 0.19 | control |
| miR_301a_3p  | 3763656 | TRIM25   | -0.35 | 0.18 | -1.9  | 5.80E-02 | 0.19 | case    |
| miR_106a_5p  | 2340433 | LEPR     | -0.42 | 0.22 | -1.9  | 5.80E-02 | 0.19 | control |
| miR_590_5p   | 3212143 | UBQLN1   | -0.27 | 0.14 | -1.9  | 5.80E-02 | 0.19 | control |
| miR_17_5p    | 2504328 | GYPC     | -0.32 | 0.17 | -1.9  | 5.80E-02 | 0.19 | control |
| let_7b_5p    | 3132940 | ANK1     | -0.25 | 0.13 | -1.9  | 5.80E-02 | 0.19 | case    |
| miR_196b_5p  | 2748346 | TLR2     | -0.43 | 0.23 | -1.9  | 5.80E-02 | 0.19 | control |
| miR_181a_5p  | 2914693 | SH3BGRL2 | -0.29 | 0.15 | -1.9  | 5.80E-02 | 0.19 | control |
| miR_191_5p   | 3588069 | TMEM85   | 1.7   | 0.89 | 1.9   | 5.80E-02 | 0.19 | control |
| miR_382_5p   | 3962560 | ATP5L2   | -0.3  | 0.16 | -1.9  | 5.80E-02 | 0.19 | case    |
| miR_301a_3p  | 2813414 | CCNB1    | -0.52 | 0.27 | -1.89 | 5.80E-02 | 0.19 | control |
| miR_197_3p   | 3442024 | NOP2     | -0.94 | 0.5  | -1.89 | 5.80E-02 | 0.19 | case    |
| miR_590_5p   | 2428760 | RSBN1    | -0.26 | 0.14 | -1.89 | 5.80E-02 | 0.19 | control |
| miR_301a_3p  | 3583638 | CYFIP1   | -0.4  | 0.21 | -1.89 | 5.80E-02 | 0.19 | case    |
| miR_628_3p   | 3980758 | MED12    | -0.36 | 0.19 | -1.89 | 5.80E-02 | 0.19 | case    |
| miR_181a_5p  | 2609870 | BRPF1    | -0.66 | 0.35 | -1.89 | 5.80E-02 | 0.19 | case    |
| miR_590_5p   | 2520069 | C2orf88  | -0.12 | 0.06 | -1.89 | 5.80E-02 | 0.19 | control |
| miR_181a_5p  | 3619326 | PLCB2    | -0.51 | 0.27 | -1.89 | 5.80E-02 | 0.19 | case    |
| let_7c       | 3764471 | MTMR4    | 0.61  | 0.32 | 1.89  | 5.80E-02 | 0.19 | control |
| miR_93_5p    | 2948425 | PPP1R10  | -0.65 | 0.34 | -1.89 | 5.80E-02 | 0.19 | case    |
| miR_103a_3p  | 2978026 | FBXO30   | -0.47 | 0.25 | -1.89 | 5.80E-02 | 0.19 | control |
| miR_590_5p   | 2488785 | ALMS1    | -0.24 | 0.13 | -1.89 | 5.80E-02 | 0.19 | control |
| miR_1275     | 3590341 | CHP      | -0.34 | 0.18 | -1.89 | 5.90E-02 | 0.19 | case    |
| miR_210      | 2613441 | KAT2B    | -0.23 | 0.12 | -1.89 | 5.90E-02 | 0.19 | control |

|              |         |          |       |      |       |          |      |         |
|--------------|---------|----------|-------|------|-------|----------|------|---------|
| miR_150_5p   | 3540552 | FUT8     | 0.76  | 0.4  | 1.89  | 5.90E-02 | 0.19 | case    |
| miR_370      | 2663295 | TMEM40   | -0.43 | 0.22 | -1.89 | 5.90E-02 | 0.19 | control |
| miR_210      | 3914786 | ABCC13   | -0.32 | 0.17 | -1.89 | 5.90E-02 | 0.19 | control |
| miR_320a     | 2545092 | HADHA    | -0.59 | 0.31 | -1.89 | 5.90E-02 | 0.19 | case    |
| miR_744_5p   | 2881860 | CCDC69   | -0.64 | 0.34 | -1.89 | 5.90E-02 | 0.19 | case    |
| miR_106a_5p  | 2893562 | RREB1    | -0.82 | 0.44 | -1.89 | 5.90E-02 | 0.19 | case    |
| miR_148b_5p  | 3968397 | WWC3     | -0.73 | 0.39 | -1.89 | 5.90E-02 | 0.19 | control |
| miR_654_5p   | 3973768 | LANCL3   | -0.67 | 0.35 | -1.89 | 5.90E-02 | 0.19 | control |
| miR_1275     | 3886050 | SRSF6    | 0.39  | 0.21 | 1.89  | 5.90E-02 | 0.19 | case    |
| miR_425_3p   | 2884216 | RNF145   | -0.62 | 0.33 | -1.89 | 5.90E-02 | 0.19 | control |
| miR_301a_3p  | 2641532 | COPG     | -0.4  | 0.21 | -1.89 | 5.90E-02 | 0.19 | case    |
| let_7c       | 3303165 | DNMBP    | 0.46  | 0.24 | 1.89  | 5.90E-02 | 0.19 | control |
| miR_196b_5p  | 3101893 | CSPP1    | -0.32 | 0.17 | -1.89 | 5.90E-02 | 0.19 | control |
| miR_1275     | 3494706 | SLAIN1   | -0.31 | 0.17 | -1.89 | 5.90E-02 | 0.19 | control |
| miR_660_5p   | 3639479 | H2AFV    | 0.44  | 0.24 | 1.89  | 5.90E-02 | 0.19 | control |
| miR_193a_5p  | 3936887 | MRPL40   | 0.51  | 0.27 | 1.89  | 5.90E-02 | 0.19 | control |
| miR_301a_3p  | 3757840 | STAT3    | -0.3  | 0.16 | -1.89 | 5.90E-02 | 0.19 | case    |
| miR_222_3p   | 2950561 | WDR46    | -0.44 | 0.23 | -1.89 | 5.90E-02 | 0.19 | case    |
| let_7d_3p    | 3320604 | USP47    | 0.21  | 0.11 | 1.89  | 5.90E-02 | 0.19 | control |
| miR_193a_5p  | 3829638 | KIAA0355 | 0.8   | 0.42 | 1.89  | 5.90E-02 | 0.19 | control |
| miR_222_3p   | 2674501 | AMT      | -0.46 | 0.25 | -1.89 | 5.90E-02 | 0.19 | case    |
| miR_1275     | 3617920 | ATPBD4   | 0.3   | 0.16 | 1.89  | 5.90E-02 | 0.19 | case    |
| miR_106a_5p  | 2752725 | NEIL3    | -0.33 | 0.18 | -1.89 | 5.90E-02 | 0.19 | control |
| let_7d_3p    | 2735759 | MMRN1    | 0.33  | 0.17 | 1.89  | 5.90E-02 | 0.19 | control |
| miR_16_1_3p  | 3432030 | ACAD10   | -0.79 | 0.42 | -1.88 | 5.90E-02 | 0.19 | case    |
| miR_93_5p    | 2958670 | RAB23    | -0.35 | 0.18 | -1.88 | 6.00E-02 | 0.19 | control |
| let_7e_5p    | 2327338 | XKR8     | -0.59 | 0.31 | -1.88 | 6.00E-02 | 0.19 | control |
| miR_20b_5p   | 2372211 | PLA2G4A  | -0.45 | 0.24 | -1.88 | 6.00E-02 | 0.19 | control |
| miR_185_5p   | 2591421 | TFPI     | -0.48 | 0.25 | -1.88 | 6.00E-02 | 0.19 | control |
| let_7d_3p    | 3760625 | CDC27    | 0.21  | 0.11 | 1.88  | 6.00E-02 | 0.19 | control |
| miR_301a_3p  | 3670918 | PLCG2    | -0.39 | 0.21 | -1.88 | 6.00E-02 | 0.19 | case    |
| miR_24_3p    | 2587618 | OLA1     | -0.85 | 0.45 | -1.88 | 6.00E-02 | 0.19 | control |
| miR_629_5p   | 2544781 | DTNB     | -0.82 | 0.44 | -1.88 | 6.00E-02 | 0.19 | case    |
| miR_301a_3p  | 3442054 | CHD4     | -0.32 | 0.17 | -1.88 | 6.00E-02 | 0.19 | case    |
| miR_181a_5p  | 2613441 | KAT2B    | -0.33 | 0.17 | -1.88 | 6.00E-02 | 0.19 | control |
| miR_590_5p   | 2688882 | C3orf17  | -0.2  | 0.11 | -1.88 | 6.00E-02 | 0.19 | control |
| miR_29b_2_5p | 3212189 | GKAP1    | -0.31 | 0.17 | -1.88 | 6.00E-02 | 0.19 | control |
| miR_93_5p    | 3822657 | CD97     | -0.38 | 0.2  | -1.88 | 6.00E-02 | 0.19 | case    |

|              |         |           |       |      |       |          |      |         |
|--------------|---------|-----------|-------|------|-------|----------|------|---------|
| miR_210      | 3759540 | DCAKD     | -0.5  | 0.26 | -1.88 | 6.00E-02 | 0.19 | case    |
| let_7b_5p    | 3770699 | MIF4GD    | 0.47  | 0.25 | 1.88  | 6.00E-02 | 0.19 | control |
| miR_16_1_3p  | 3774728 | CCDC57    | -0.83 | 0.44 | -1.88 | 6.00E-02 | 0.19 | case    |
| miR_590_5p   | 2475710 | LCLAT1    | -0.21 | 0.11 | -1.88 | 6.00E-02 | 0.19 | control |
| miR_29b_2_5p | 3456260 | ATF7      | -0.49 | 0.26 | -1.88 | 6.00E-02 | 0.19 | case    |
| miR_197_3p   | 3759356 | EFTUD2    | -0.54 | 0.29 | -1.88 | 6.00E-02 | 0.19 | case    |
| miR_93_5p    | 2587618 | OLA1      | -0.51 | 0.27 | -1.88 | 6.00E-02 | 0.19 | control |
| miR_106b_5p  | 2486851 | APLF      | -0.42 | 0.22 | -1.88 | 6.00E-02 | 0.19 | control |
| miR_181a_5p  | 3352503 | ARHGEF12  | -0.27 | 0.14 | -1.88 | 6.00E-02 | 0.19 | control |
| miR_301a_3p  | 3030448 | ZNF398    | -0.58 | 0.31 | -1.88 | 6.00E-02 | 0.19 | case    |
| miR_590_5p   | 2601648 | DOCK10    | -0.15 | 0.08 | -1.88 | 6.00E-02 | 0.19 | control |
| miR_197_3p   | 2949524 | EHMT2     | -1.1  | 0.59 | -1.88 | 6.00E-02 | 0.19 | case    |
| miR_144_5p   | 3695726 | AGRP      | 0.36  | 0.19 | 1.88  | 6.10E-02 | 0.19 | control |
| miR_20a_5p   | 2620256 | KIF15     | -0.34 | 0.18 | -1.88 | 6.10E-02 | 0.19 | control |
| miR_505_5p   | 3855968 | ZNF506    | 0.72  | 0.39 | 1.88  | 6.10E-02 | 0.19 | control |
| miR_320a     | 2948713 | RDBP      | -0.75 | 0.4  | -1.88 | 6.10E-02 | 0.19 | case    |
| miR_18a_3p   | 3383227 | GAB2      | -0.45 | 0.24 | -1.88 | 6.10E-02 | 0.19 | control |
| miR_106b_5p  | 2828146 | CDC42SE2  | -0.46 | 0.25 | -1.88 | 6.10E-02 | 0.19 | control |
| miR_301a_3p  | 2610394 | TATDN2    | -0.47 | 0.25 | -1.88 | 6.10E-02 | 0.19 | case    |
| miR_93_5p    | 3375340 | CPSF7     | -0.55 | 0.29 | -1.88 | 6.10E-02 | 0.19 | case    |
| miR_340_5p   | 2437086 | DPM3      | 0.88  | 0.47 | 1.88  | 6.10E-02 | 0.19 | case    |
| miR_20b_5p   | 2832081 | ZMAT2     | -0.3  | 0.16 | -1.87 | 6.10E-02 | 0.19 | control |
| miR_106b_5p  | 2620256 | KIF15     | -0.36 | 0.19 | -1.87 | 6.10E-02 | 0.19 | control |
| miR_210      | 3819880 | ZNF317    | -0.51 | 0.27 | -1.87 | 6.10E-02 | 0.19 | case    |
| miR_106a_5p  | 3942179 | MTMR3     | -0.42 | 0.22 | -1.87 | 6.10E-02 | 0.19 | case    |
| miR_17_5p    | 2887048 | STK10     | -0.43 | 0.23 | -1.87 | 6.10E-02 | 0.19 | case    |
| miR_301a_3p  | 2395245 | RERE      | -0.6  | 0.32 | -1.87 | 6.10E-02 | 0.19 | case    |
| miR_106a_5p  | 3020444 | CAPZA2    | -0.33 | 0.17 | -1.87 | 6.10E-02 | 0.19 | control |
| miR_155_5p   | 3742783 | NLRP1     | -0.53 | 0.28 | -1.87 | 6.10E-02 | 0.19 | case    |
| miR_1275     | 3540552 | FUT8      | 0.3   | 0.16 | 1.87  | 6.10E-02 | 0.19 | case    |
| miR_590_5p   | 2594773 | ALS2CR12  | -0.13 | 0.07 | -1.87 | 6.10E-02 | 0.19 | control |
| let_7b_5p    | 3400034 | WNK1      | -0.27 | 0.15 | -1.87 | 6.10E-02 | 0.19 | case    |
| miR_1275     | 3568534 | SPTB      | -0.23 | 0.13 | -1.87 | 6.10E-02 | 0.19 | case    |
| miR_144_5p   | 2431112 | NOTCH2    | -0.24 | 0.13 | -1.87 | 6.10E-02 | 0.19 | case    |
| miR_181a_5p  | 3841545 | LILRA1    | -0.42 | 0.23 | -1.87 | 6.10E-02 | 0.19 | case    |
| miR_628_3p   | 2382360 | DEGS1     | -0.32 | 0.17 | -1.87 | 6.10E-02 | 0.19 | control |
| miR_29c_3p   | 2504328 | GYPC      | -0.28 | 0.15 | -1.87 | 6.10E-02 | 0.19 | control |
| miR_454_3p   | 2946681 | HIST1H2BJ | -0.33 | 0.17 | -1.87 | 6.10E-02 | 0.19 | control |

|             |         |          |       |      |       |          |      |         |
|-------------|---------|----------|-------|------|-------|----------|------|---------|
| miR_197_3p  | 2662331 | CAMK1    | -0.88 | 0.47 | -1.87 | 6.10E-02 | 0.19 | case    |
| miR_93_5p   | 2881187 | CSF1R    | -0.41 | 0.22 | -1.87 | 6.10E-02 | 0.19 | case    |
| miR_196b_5p | 2824198 | APC      | -0.4  | 0.22 | -1.87 | 6.10E-02 | 0.19 | control |
| let_7c      | 3843848 | ZNF544   | 0.54  | 0.29 | 1.87  | 6.10E-02 | 0.19 | control |
| miR_1275    | 3779756 | SEH1L    | 0.32  | 0.17 | 1.87  | 6.10E-02 | 0.19 | case    |
| miR_660_5p  | 2594812 | TRAK2    | -0.25 | 0.14 | -1.87 | 6.10E-02 | 0.19 | control |
| miR_20b_5p  | 2406420 | CLSPN    | -0.43 | 0.23 | -1.87 | 6.20E-02 | 0.19 | control |
| miR_106b_5p | 2649532 | RSRC1    | -0.26 | 0.14 | -1.87 | 6.20E-02 | 0.19 | control |
| miR_590_5p  | 3756193 | TOP2A    | -0.25 | 0.13 | -1.87 | 6.20E-02 | 0.19 | control |
| miR_29c_3p  | 2726323 | SLAIN2   | -0.43 | 0.23 | -1.87 | 6.20E-02 | 0.19 | control |
| miR_210     | 3380901 | NUMA1    | -0.54 | 0.29 | -1.87 | 6.20E-02 | 0.19 | case    |
| miR_1275    | 3378818 | PTPRCAP  | -0.46 | 0.25 | -1.87 | 6.20E-02 | 0.19 | control |
| miR_301a_3p | 2437801 | ARHGEF2  | -0.51 | 0.27 | -1.87 | 6.20E-02 | 0.19 | case    |
| miR_590_5p  | 2442134 | TMCO1    | -0.2  | 0.11 | -1.87 | 6.20E-02 | 0.19 | control |
| miR_30c_5p  | 2527606 | ARPC2    | -1.22 | 0.65 | -1.87 | 6.20E-02 | 0.19 | control |
| miR_193a_5p | 3739108 | FN3KRP   | 0.59  | 0.32 | 1.87  | 6.20E-02 | 0.19 | control |
| miR_197_3p  | 3326252 | NAT10    | -0.76 | 0.41 | -1.87 | 6.20E-02 | 0.19 | case    |
| miR_185_5p  | 3192609 | GF11B    | -0.58 | 0.31 | -1.87 | 6.20E-02 | 0.19 | control |
| miR_320a    | 3959631 | EIF3D    | -0.65 | 0.35 | -1.87 | 6.20E-02 | 0.19 | case    |
| miR_17_5p   | 2888519 | UIMC1    | -0.51 | 0.27 | -1.87 | 6.20E-02 | 0.19 | control |
| miR_29c_3p  | 3352503 | ARHGEF12 | -0.19 | 0.1  | -1.87 | 6.20E-02 | 0.19 | control |
| miR_106b_5p | 3024275 | MKLN1    | -0.38 | 0.21 | -1.87 | 6.20E-02 | 0.19 | control |
| miR_17_5p   | 2902463 | BAT2     | -0.57 | 0.3  | -1.87 | 6.20E-02 | 0.19 | case    |
| miR_590_5p  | 3572263 | ACYPI    | -0.23 | 0.12 | -1.87 | 6.20E-02 | 0.19 | control |
| miR_106a_5p | 2902444 | AIF1     | -0.38 | 0.2  | -1.87 | 6.20E-02 | 0.19 | control |
| miR_629_5p  | 2361731 | PRCC     | -0.82 | 0.44 | -1.87 | 6.20E-02 | 0.19 | case    |
| let_7c      | 3881874 | ASXL1    | 0.62  | 0.33 | 1.87  | 6.20E-02 | 0.19 | control |
| miR_1275    | 4013549 | ITM2A    | 0.26  | 0.14 | 1.86  | 6.20E-02 | 0.19 | case    |
| miR_93_5p   | 2693569 | ZXDC     | -0.85 | 0.46 | -1.86 | 6.20E-02 | 0.19 | case    |
| miR_210     | 3244488 | RASSF4   | -0.49 | 0.26 | -1.86 | 6.20E-02 | 0.19 | case    |
| miR_145_5p  | 3608220 | CRTC3    | -0.53 | 0.29 | -1.86 | 6.20E-02 | 0.19 | case    |
| miR_590_5p  | 3067080 | COG5     | -0.2  | 0.11 | -1.86 | 6.20E-02 | 0.19 | control |
| miR_1275    | 3389878 | ALKBH8   | 0.28  | 0.15 | 1.86  | 6.20E-02 | 0.19 | case    |
| miR_454_3p  | 3398482 | SNX19    | -0.44 | 0.23 | -1.86 | 6.20E-02 | 0.19 | case    |
| miR_320a    | 3135452 | ATP6V1H  | 0.83  | 0.45 | 1.86  | 6.20E-02 | 0.19 | control |
| miR_155_5p  | 3091301 | PTK2B    | -0.47 | 0.25 | -1.86 | 6.30E-02 | 0.19 | case    |
| let_7g_5p   | 2318637 | VAMP3    | -0.53 | 0.29 | -1.86 | 6.30E-02 | 0.19 | control |
| miR_590_5p  | 2351872 | RAP1A    | -0.22 | 0.12 | -1.86 | 6.30E-02 | 0.19 | control |



|             |         |          |       |      |       |          |      |         |
|-------------|---------|----------|-------|------|-------|----------|------|---------|
| miR_16_5p   | 3372253 | CELF1    | -0.52 | 0.28 | -1.86 | 6.30E-02 | 0.19 | case    |
| let_7d_3p   | 2973694 | ARHGAP18 | 0.24  | 0.13 | 1.86  | 6.30E-02 | 0.19 | control |
| let_7c      | 3863060 | EXOSC5   | 0.61  | 0.33 | 1.86  | 6.30E-02 | 0.19 | control |
| miR_625_5p  | 4007774 | WDR45    | -0.51 | 0.27 | -1.86 | 6.30E-02 | 0.19 | control |
| miR_148b_5p | 2796553 | ACSL1    | -0.34 | 0.18 | -1.86 | 6.30E-02 | 0.19 | control |
| miR_148a_3p | 3765580 | BRIP1    | -0.24 | 0.13 | -1.86 | 6.30E-02 | 0.19 | control |
| miR_193a_5p | 3686587 | CCDC101  | -0.48 | 0.26 | -1.86 | 6.30E-02 | 0.19 | case    |
| miR_210     | 2574646 | BIN1     | -0.63 | 0.34 | -1.86 | 6.30E-02 | 0.19 | case    |
| miR_18a_3p  | 3316208 | TALDO1   | -0.52 | 0.28 | -1.86 | 6.30E-02 | 0.19 | control |
| miR_301a_3p | 3334025 | MARK2    | -0.45 | 0.24 | -1.86 | 6.30E-02 | 0.19 | case    |
| miR_590_5p  | 2450345 | KIF14    | -0.22 | 0.12 | -1.86 | 6.30E-02 | 0.19 | control |
| miR_148a_3p | 2881239 | PDGFRB   | 0.68  | 0.37 | 1.86  | 6.30E-02 | 0.19 | control |
| let_7c      | 3824963 | PGPEP1   | 0.59  | 0.32 | 1.86  | 6.30E-02 | 0.19 | control |
| miR_106a_5p | 3756193 | TOP2A    | -0.53 | 0.28 | -1.86 | 6.30E-02 | 0.19 | control |
| miR_181a_5p | 2726323 | SLAIN2   | -0.53 | 0.29 | -1.86 | 6.30E-02 | 0.19 | control |
| miR_590_5p  | 2388525 | SDCCAG8  | -0.17 | 0.09 | -1.86 | 6.30E-02 | 0.19 | control |
| miR_181a_5p | 3352070 | CBL      | -0.49 | 0.27 | -1.86 | 6.40E-02 | 0.19 | case    |
| miR_181a_5p | 3105430 | LRRCC1   | -0.38 | 0.21 | -1.86 | 6.40E-02 | 0.19 | control |
| miR_148b_5p | 2435410 | S100A11  | -0.41 | 0.22 | -1.85 | 6.40E-02 | 0.19 | control |
| let_7c      | 3154700 | ZFAT     | -0.7  | 0.38 | -1.85 | 6.40E-02 | 0.19 | case    |
| miR_25_5p   | 2780172 | CENPE    | -0.45 | 0.24 | -1.85 | 6.40E-02 | 0.19 | control |
| miR_7_1_3p  | 3316208 | TALDO1   | -0.29 | 0.15 | -1.85 | 6.40E-02 | 0.19 | control |
| miR_155_5p  | 2609870 | BRPF1    | -0.66 | 0.36 | -1.85 | 6.40E-02 | 0.19 | case    |
| miR_106b_5p | 3756193 | TOP2A    | -0.52 | 0.28 | -1.85 | 6.40E-02 | 0.2  | control |
| miR_1275    | 3806905 | SMAD2    | 0.26  | 0.14 | 1.85  | 6.40E-02 | 0.2  | case    |
| let_7e_5p   | 3572235 | MLH3     | 0.42  | 0.23 | 1.85  | 6.40E-02 | 0.2  | case    |
| miR_301a_3p | 2609960 | TTLL3    | -0.57 | 0.31 | -1.85 | 6.40E-02 | 0.2  | case    |
| miR_93_5p   | 2591837 | SLC40A1  | -0.39 | 0.21 | -1.85 | 6.40E-02 | 0.2  | control |
| miR_148b_5p | 3779362 | IMPA2    | -0.51 | 0.28 | -1.85 | 6.40E-02 | 0.2  | control |
| miR_212_3p  | 3037385 | KDELR2   | -0.41 | 0.22 | -1.85 | 6.40E-02 | 0.2  | control |
| miR_193a_5p | 3649811 | NDE1     | -0.36 | 0.2  | -1.85 | 6.40E-02 | 0.2  | case    |
| miR_210     | 3646164 | DNAJA3   | -0.56 | 0.3  | -1.85 | 6.40E-02 | 0.2  | case    |
| miR_301a_3p | 2360257 | IL6R     | -0.42 | 0.23 | -1.85 | 6.40E-02 | 0.2  | case    |
| miR_616_3p  | 3670918 | PLCG2    | -0.51 | 0.28 | -1.85 | 6.40E-02 | 0.2  | case    |
| miR_744_5p  | 3159132 | COMMD5   | 1.23  | 0.67 | 1.85  | 6.40E-02 | 0.2  | control |
| miR_197_3p  | 3945585 | APOBEC3D | -0.59 | 0.32 | -1.85 | 6.50E-02 | 0.2  | case    |
| miR_93_5p   | 2893562 | RREB1    | -0.86 | 0.46 | -1.85 | 6.50E-02 | 0.2  | case    |
| miR_181a_5p | 2532064 | COPS7B   | -0.54 | 0.29 | -1.85 | 6.50E-02 | 0.2  | case    |

|              |         |           |       |      |       |          |     |         |
|--------------|---------|-----------|-------|------|-------|----------|-----|---------|
| miR_106a_5p  | 2693569 | ZXDC      | -0.76 | 0.41 | -1.85 | 6.50E-02 | 0.2 | case    |
| miR_224_5p   | 2376849 | RASSF5    | -0.85 | 0.46 | -1.85 | 6.50E-02 | 0.2 | case    |
| miR_29b_2_5p | 2925724 | AKAP7     | -0.3  | 0.16 | -1.85 | 6.50E-02 | 0.2 | control |
| miR_222_3p   | 3861978 | PAF1      | -0.32 | 0.17 | -1.85 | 6.50E-02 | 0.2 | case    |
| miR_590_5p   | 2713192 | DLG1      | -0.16 | 0.09 | -1.85 | 6.50E-02 | 0.2 | control |
| miR_103a_3p  | 2371738 | C1orf26   | -0.31 | 0.17 | -1.85 | 6.50E-02 | 0.2 | control |
| miR_128      | 3028011 | MGAM      | -0.39 | 0.21 | -1.85 | 6.50E-02 | 0.2 | control |
| miR_93_5p    | 2360257 | IL6R      | -0.47 | 0.25 | -1.85 | 6.50E-02 | 0.2 | case    |
| miR_197_3p   | 2452977 | FAIM3     | -0.58 | 0.31 | -1.85 | 6.50E-02 | 0.2 | case    |
| miR_320a     | 4017281 | NUP62CL   | -0.53 | 0.28 | -1.85 | 6.50E-02 | 0.2 | control |
| let_7b_5p    | 3957486 | DUSP18    | 0.31  | 0.17 | 1.85  | 6.50E-02 | 0.2 | control |
| miR_155_5p   | 2663396 | IQSEC1    | -0.48 | 0.26 | -1.85 | 6.50E-02 | 0.2 | case    |
| let_7d_5p    | 2447454 | ARPC5     | -1.18 | 0.64 | -1.85 | 6.50E-02 | 0.2 | control |
| miR_93_5p    | 3061651 | BET1      | 0.3   | 0.16 | 1.85  | 6.50E-02 | 0.2 | case    |
| miR_221_3p   | 3682445 | XYLT1     | -0.6  | 0.33 | -1.85 | 6.50E-02 | 0.2 | case    |
| miR_590_5p   | 3573994 | C14orf145 | -0.15 | 0.08 | -1.84 | 6.50E-02 | 0.2 | control |
| miR_17_5p    | 3315114 | TUBGCP2   | -0.62 | 0.34 | -1.84 | 6.50E-02 | 0.2 | case    |
| miR_16_1_3p  | 2701294 | TMEM14E   | -0.35 | 0.19 | -1.84 | 6.50E-02 | 0.2 | control |
| miR_590_5p   | 3127878 | ENTPD4    | -0.31 | 0.17 | -1.84 | 6.50E-02 | 0.2 | case    |
| miR_20a_5p   | 2449559 | ASPM      | -0.43 | 0.23 | -1.84 | 6.50E-02 | 0.2 | control |
| miR_185_5p   | 3246888 | PRKG1     | -0.79 | 0.43 | -1.84 | 6.60E-02 | 0.2 | control |
| miR_505_5p   | 2858592 | DEPDC1B   | -0.61 | 0.33 | -1.84 | 6.60E-02 | 0.2 | control |
| miR_590_5p   | 2417791 | ANKRD13C  | -0.2  | 0.11 | -1.84 | 6.60E-02 | 0.2 | control |
| miR_28_3p    | 3014714 | ARPC1B    | -0.47 | 0.26 | -1.84 | 6.60E-02 | 0.2 | control |
| miR_629_5p   | 3645901 | NAT15     | -0.8  | 0.43 | -1.84 | 6.60E-02 | 0.2 | case    |
| miR_1236     | 3669059 | GABARAPL2 | 0.79  | 0.43 | 1.84  | 6.60E-02 | 0.2 | control |
| miR_127_3p   | 2963784 | AKIRIN2   | -0.51 | 0.28 | -1.84 | 6.60E-02 | 0.2 | control |
| miR_34b_3p   | 2454343 | RD3       | -1.17 | 0.64 | -1.84 | 6.60E-02 | 0.2 | control |
| miR_146a_5p  | 2447454 | ARPC5     | -1.19 | 0.65 | -1.84 | 6.60E-02 | 0.2 | control |
| let_7d_5p    | 3833757 | SNRPA     | 0.72  | 0.39 | 1.84  | 6.60E-02 | 0.2 | control |
| miR_181a_5p  | 2887048 | STK10     | -0.49 | 0.26 | -1.84 | 6.60E-02 | 0.2 | case    |
| miR_133a     | 3281762 | ENKUR     | 0.15  | 0.08 | 1.84  | 6.60E-02 | 0.2 | case    |
| miR_144_5p   | 3678395 | GLYR1     | -0.34 | 0.18 | -1.84 | 6.60E-02 | 0.2 | case    |
| miR_16_1_3p  | 2428313 | ST7L      | -0.73 | 0.4  | -1.84 | 6.60E-02 | 0.2 | control |
| miR_301a_3p  | 3847252 | SAFB2     | -0.52 | 0.28 | -1.84 | 6.60E-02 | 0.2 | case    |
| miR_210      | 3685183 | GGA2      | -0.35 | 0.19 | -1.84 | 6.60E-02 | 0.2 | case    |
| miR_301a_3p  | 2411228 | STIL      | -0.33 | 0.18 | -1.84 | 6.60E-02 | 0.2 | control |
| miR_423_5p   | 3686587 | CCDC101   | -0.71 | 0.39 | -1.84 | 6.60E-02 | 0.2 | case    |

|             |         |           |       |      |       |          |     |         |
|-------------|---------|-----------|-------|------|-------|----------|-----|---------|
| miR_210     | 3072276 | UBE2H     | -0.27 | 0.15 | -1.84 | 6.60E-02 | 0.2 | control |
| miR_20b_5p  | 2662491 | TMEM111   | -0.24 | 0.13 | -1.84 | 6.60E-02 | 0.2 | control |
| let_7d_3p   | 3592484 | PLDN      | 0.21  | 0.11 | 1.84  | 6.60E-02 | 0.2 | control |
| miR_181a_5p | 3016380 | CUX1      | -0.73 | 0.4  | -1.84 | 6.60E-02 | 0.2 | case    |
| miR_505_5p  | 2779408 | MAPKSP1   | 0.33  | 0.18 | 1.84  | 6.60E-02 | 0.2 | case    |
| miR_505_5p  | 3951887 | ATP6V1E1  | 0.45  | 0.24 | 1.84  | 6.60E-02 | 0.2 | case    |
| miR_301a_3p | 3066496 | ATXN7L1   | -0.6  | 0.33 | -1.84 | 6.60E-02 | 0.2 | case    |
| miR_19a_3p  | 2384705 | URB2      | 0.79  | 0.43 | 1.84  | 6.60E-02 | 0.2 | control |
| miR_590_5p  | 2945645 | TDP2      | -0.16 | 0.09 | -1.84 | 6.60E-02 | 0.2 | control |
| miR_106b_5p | 2343289 | DNAJB4    | -0.21 | 0.11 | -1.84 | 6.60E-02 | 0.2 | control |
| miR_1275    | 3320819 | MICALCL   | -0.23 | 0.12 | -1.84 | 6.60E-02 | 0.2 | case    |
| miR_25_5p   | 3851072 | ACP5      | 0.36  | 0.2  | 1.84  | 6.60E-02 | 0.2 | control |
| let_7c      | 2583602 | RBMS1     | -0.34 | 0.18 | -1.84 | 6.60E-02 | 0.2 | control |
| miR_196b_5p | 2347132 | FNBP1L    | -0.3  | 0.17 | -1.84 | 6.60E-02 | 0.2 | control |
| miR_197_3p  | 3866898 | LIG1      | -1.41 | 0.77 | -1.84 | 6.60E-02 | 0.2 | case    |
| miR_210     | 2488732 | CCT7      | -0.34 | 0.19 | -1.83 | 6.70E-02 | 0.2 | case    |
| miR_93_5p   | 3131741 | RAB11FIP1 | -0.42 | 0.23 | -1.83 | 6.70E-02 | 0.2 | case    |
| miR_1275    | 3812426 | RTTN      | 0.45  | 0.24 | 1.83  | 6.70E-02 | 0.2 | case    |
| let_7b_5p   | 3563395 | POLE2     | -0.22 | 0.12 | -1.83 | 6.70E-02 | 0.2 | control |
| miR_590_5p  | 3719980 | LASP1     | -0.21 | 0.12 | -1.83 | 6.70E-02 | 0.2 | case    |
| miR_375     | 2428313 | ST7L      | -0.73 | 0.4  | -1.83 | 6.70E-02 | 0.2 | control |
| miR_197_3p  | 3373845 | SLC43A3   | -0.72 | 0.39 | -1.83 | 6.70E-02 | 0.2 | case    |
| miR_660_5p  | 2910477 | FBXO9     | -0.3  | 0.17 | -1.83 | 6.70E-02 | 0.2 | control |
| miR_106a_5p | 3701623 | GAFA2     | -0.26 | 0.14 | -1.83 | 6.70E-02 | 0.2 | case    |
| let_7d_3p   | 3994795 | MTM1      | 0.28  | 0.15 | 1.83  | 6.70E-02 | 0.2 | control |
| let_7c      | 3418492 | TSPAN31   | 0.47  | 0.26 | 1.83  | 6.70E-02 | 0.2 | control |
| miR_130a_3p | 2726323 | SLAIN2    | -0.48 | 0.26 | -1.83 | 6.70E-02 | 0.2 | control |

**Supplementary Table VII: Summary of the Clinical Characteristics of the replication populations (63 CHD Case and 1000 Controls)**

|                                    | <b>CHD Cases</b><br>N=63 | <b>CHD Controls</b><br>N=1000 |
|------------------------------------|--------------------------|-------------------------------|
| Age (yr )                          | 73.2±8.9                 | 65.6±8.0                      |
| Sex, male (%)                      | 46 (73)                  | 386 (39)                      |
| Hypertension, n (%)                | 50 (79)                  | 504 (50)                      |
| Diabetes, n (%)                    | 24 (38)                  | 110 (11)                      |
| BMI (kg/m <sup>2</sup> )           | 29.2±4.8                 | 27.9±5.5                      |
| Systolic BP (mm Hg)                | 127 ±17                  | 128±17                        |
| Diastolic BP (mm Hg)               | 67±10                    | 74±10                         |
| Total cholesterol (mg/dl)          | 153±34                   | 192±36                        |
| Triglycerides (mg/dl)              | 126±86                   | 117±71                        |
| HDL cholesterol (mg/dl)            | 49±13                    | 60±18                         |
| Glucose                            | 112±32                   | 105±21                        |
| Lipid treatment, n (%)             | 59 (94)                  | 336 (34)                      |
| Anti-hypertensive treatment, n (%) | 50 (79)                  | 439 (44)                      |
| Diabetes treatment, n (%)          | 21 (33)                  | 61 (6)                        |
| Current cigarette smoking, n (%)   | 6 (10)                   | 81 (8)                        |

**Supplementary Table VIII: *cis*-mRNA-eSNPs in predicted miRNA Targeting Sites of mRNAs**

| <b>mRNA-eSNP</b> | <b>mRNA</b> | <b>miRNA correlated with and targeting the corresponding mRNA</b> |
|------------------|-------------|-------------------------------------------------------------------|
| rs10226803       | NAA38       | hsa-miR-151a-5p                                                   |
| rs10267938       | NAA38       | hsa-miR-1255b-5p                                                  |
| rs10793055       | CLPB        | hsa-miR-7-5p                                                      |
| rs10858864       | POC1B       | hsa-miR-744-5p                                                    |
| rs10858879       | POC1B       | hsa-miR-148b-3p                                                   |
| rs1107811        | GGTA1       | hsa-miR-29b-2-5p                                                  |
| rs11219888       | CCDC15      | hsa-miR-29b-2-5p                                                  |
| rs11631947       | IGF1R       | hsa-miR-181a-5p                                                   |
| rs11655903       | C17orf68    | hsa-miR-17-5p                                                     |
| rs11973400       | GIMAP5      | hsa-miR-324-3p                                                    |
| rs1199072        | CISD1       | hsa-miR-24-2-5p                                                   |
| rs1199072        | IPMK        | hsa-miR-24-2-5p                                                   |
| rs12568384       | SLC22A15    | hsa-miR-378a-5p                                                   |
| rs12577557       | CYB5R2      | hsa-miR-26a-1-3p                                                  |
| rs12614872       | BARD1       | hsa-miR-25-5p                                                     |
| rs13001462       | BARD1       | hsa-miR-181a-5p                                                   |
| rs13284967       | C9orf72     | hsa-miR-628-3p                                                    |
| rs13297359       | TOR1B       | hsa-miR-17-5p                                                     |
| rs13297359       | C9orf78     | hsa-miR-17-5p                                                     |
| rs1346945        | HSPBAP1     | hsa-miR-24-2-5p                                                   |
| rs1456721        | DZIP3       | hsa-miR-17-5p                                                     |
| rs1493451        | CENPK       | hsa-miR-195-5p                                                    |
| rs1504534        | FAM174A     | hsa-miR-196b-5p                                                   |
| rs1543681        | HIST1H4H    | hsa-miR-505-5p                                                    |
| rs1543681        | HIST1H2BF   | hsa-miR-505-5p                                                    |
| rs1562748        | LPIN1       | hsa-miR-181a-5p                                                   |
| rs16897666       | COX6C       | hsa-miR-505-5p                                                    |
| rs17088553       | TMPRSS11D   | hsa-miR-200c-3p                                                   |
| rs17088553       | GNRHR       | hsa-miR-200c-3p                                                   |
| rs1739886        | C6orf162    | hsa-miR-24-2-5p                                                   |
| rs17488675       | ARPC5       | hsa-miR-223-3p                                                    |
| rs17629956       | C22orf43    | hsa-miR-7-5p                                                      |
| rs17838439       | RPIA        | hsa-miR-502-3p                                                    |
| rs1982756        | TREML4      | hsa-miR-335-3p                                                    |
| rs1982756        | TREM1       | hsa-miR-335-3p                                                    |
| rs2016407        | APOBEC3B    | hsa-miR-221-3p                                                    |
| rs2072708        | TST         | hsa-miR-200c-3p                                                   |

|           |          |                 |
|-----------|----------|-----------------|
| rs2075516 | MYH11    | hsa-miR-505-5p  |
| rs2100220 | COX6C    | hsa-miR-454-3p  |
| rs2148621 | ARPC5    | hsa-miR-184     |
| rs2296775 | POLR1E   | hsa-miR-181a-5p |
| rs2303792 | COG4     | hsa-miR-652-3p  |
| rs2306676 | RPIA     | hsa-miR-744-5p  |
| rs2453644 | SPAG1    | hsa-miR-17-5p   |
| rs2462904 | SKAP2    | hsa-miR-454-3p  |
| rs2769365 | SKAP2    | hsa-miR-454-3p  |
| rs2839191 | DIP2A    | hsa-miR-196b-5p |
| rs2966564 | DZIP3    | hsa-miR-301a-3p |
| rs363608  | INO80B   | hsa-miR-378a-5p |
| rs3737438 | DIP2A    | hsa-miR-93-5p   |
| rs3740651 | TMEM80   | hsa-miR-24-2-5p |
| rs3765012 | DHPS     | hsa-miR-324-3p  |
| rs3765012 | RNASEH2A | hsa-miR-324-3p  |
| rs3765012 | MAN2B1   | hsa-miR-324-3p  |
| rs3765012 | TNPO2    | hsa-miR-324-3p  |
| rs3765012 | IL27RA   | hsa-miR-324-3p  |
| rs3765012 | C19orf43 | hsa-miR-324-3p  |
| rs3765012 | FARSA    | hsa-miR-324-3p  |
| rs3771172 | IL1RL1   | hsa-miR-1260a   |
| rs3771172 | IL18RAP  | hsa-miR-1260a   |
| rs38828   | NAA38    | hsa-miR-425-3p  |
| rs405684  | TRIM37   | hsa-miR-320a    |
| rs4141796 | DDX27    | hsa-miR-629-5p  |
| rs4239846 | ATP6V1E1 | hsa-miR-196b-5p |
| rs4259246 | UHRF1BP1 | hsa-miR-200c-3p |
| rs4851614 | IL18RAP  | hsa-miR-148b-5p |
| rs4851614 | IL1RL1   | hsa-miR-148b-5p |
| rs499910  | SIDT2    | hsa-miR-181a-5p |
| rs5747064 | ATP6V1E1 | hsa-miR-212-3p  |
| rs6031858 | YWHAB    | hsa-miR-629-5p  |
| rs6058110 | HM13     | hsa-miR-144-5p  |
| rs6058197 | HM13     | hsa-miR-93-5p   |
| rs6087778 | HM13     | hsa-miR-155-5p  |
| rs6087778 | TPX2     | hsa-miR-155-5p  |
| rs6089071 | HM13     | hsa-miR-185-5p  |
| rs6119725 | HM13     | hsa-miR-155-5p  |
| rs6466645 | NAA38    | hsa-miR-17-5p   |
| rs6908328 | HIST1H4H | hsa-miR-423-5p  |

|            |           |                 |
|------------|-----------|-----------------|
| rs6908328  | HIST1H2BF | hsa-miR-423-5p  |
| rs6935500  | VNN3      | hsa-miR-365a-3p |
| rs6935500  | VNN2      | hsa-miR-365a-3p |
| rs7199717  | MYH11     | hsa-miR-199a-3p |
| rs7522150  | DENND2D   | hsa-miR-193a-5p |
| rs774251   | SKAP2     | hsa-miR-196b-5p |
| rs7761779  | HIST1H4H  | hsa-miR-193a-5p |
| rs7841423  | TRAPPC9   | hsa-miR-155-5p  |
| rs7850573  | TJP2      | hsa-miR-144-5p  |
| rs791320   | ISCA1     | hsa-miR-20b-5p  |
| rs7994566  | RCBTB1    | hsa-miR-636     |
| rs870181   | VPS53     | hsa-miR-25-5p   |
| rs879172   | RAPGEF1   | hsa-miR-652-3p  |
| rs920071   | GGTA1     | hsa-miR-628-3p  |
| rs9349413  | CD2AP     | hsa-miR-196b-5p |
| rs9353462  | C6orf162  | hsa-miR-16-1-3p |
| rs9393791  | BTN3A2    | hsa-miR-423-5p  |
| rs9894586  | GSDMB     | hsa-miR-654-5p  |
| rs1051500  | ZNF132    | hsa-miR-221-3p  |
| rs10733709 | TGFBR1    | hsa-miR-93-3p   |
| rs10807248 | TREML4    | hsa-miR-502-5p  |
| rs11211237 | PIK3R3    | hsa-miR-628-3p  |
| rs11608404 | NUP107    | hsa-miR-590-5p  |
| rs12566133 | TAF13     | hsa-miR-629-3p  |
| rs12602426 | SSH2      | hsa-miR-340-5p  |
| rs1660328  | SPAG1     | hsa-miR-454-3p  |
| rs17582921 | TLR1      | hsa-miR-27a-5p  |
| rs1926838  | ARPC5     | hsa-miR-193a-5p |
| rs198851   | HIST1H4B  | hsa-miR-505-5p  |
| rs2167930  | TSGA10    | hsa-miR-301a-3p |
| rs2237328  | SKAP2     | hsa-miR-27a-5p  |
| rs2289590  | C17orf68  | hsa-miR-27a-5p  |
| rs2632283  | TSGA10    | hsa-miR-106a-5p |
| rs27137    | CENPK     | hsa-miR-195-5p  |
| rs27137    | ADAMTS6   | hsa-miR-195-5p  |
| rs2836302  | KCNJ15    | hsa-miR-145-5p  |
| rs3747023  | ATP6V1E1  | hsa-miR-16-5p   |
| rs3847652  | PEBP1     | hsa-miR-625-3p  |
| rs4815642  | UBOX5     | hsa-miR-185-5p  |
| rs606695   | C1orf156  | hsa-miR-106a-5p |
| rs6424911  | ARPC5     | hsa-miR-27a-5p  |

|            |            |                  |
|------------|------------|------------------|
| rs770376   | POC1B      | hsa-miR-324-5p   |
| rs9393692  | HIST1H4H   | hsa-miR-505-5p   |
| rs9393692  | HIST1H2BF  | hsa-miR-505-5p   |
| rs9604771  | ATP6V1E1   | hsa-miR-29b-2-5p |
| rs9616694  | C22orf34   | hsa-miR-27a-5p   |
| rs9616694  | FLJ44385   | hsa-miR-27a-5p   |
| rs9986459  | BTN3A2     | hsa-miR-505-5p   |
| rs9986459  | HIST1H4B   | hsa-miR-505-5p   |
| rs1005277  | HSD17B7P2  | hsa-miR-99b-5p   |
| rs10772998 | CDK2AP1    | hsa-let-7b-5p    |
| rs13109533 | ARFIP1     | hsa-miR-27a-5p   |
| rs1736969  | IFITM4P    | hsa-let-7g-3p    |
| rs174371   | ATP6V1E1   | hsa-miR-29c-3p   |
| rs36135    | ADAMTS6    | hsa-miR-195-5p   |
| rs36135    | CENPK      | hsa-miR-195-5p   |
| rs4658685  | EFCAB2     | hsa-miR-106b-5p  |
| rs725510   | SCP2       | hsa-miR-590-5p   |
| rs7657160  | ARFIP1     | hsa-miR-27a-5p   |
| rs12758653 | PPT1       | hsa-let-7b-5p    |
| rs1692004  | SPAG1      | hsa-miR-93-3p    |
| rs2246626  | HLA-B      | hsa-miR-142-3p   |
| rs12442313 | IGF1R      | hsa-let-7b-5p    |
| rs1773321  | LRRC7      | hsa-let-7b-5p    |
| rs1788199  | SPAG1      | hsa-let-7d-5p    |
| rs1788199  | SPAG1      | hsa-miR-106b-5p  |
| rs27770    | DCTN5      | hsa-let-7b-5p    |
| rs4673925  | BARD1      | hsa-let-7b-5p    |
| rs4673925  | BARD1      | hsa-let-7d-5p    |
| rs4673925  | BARD1      | hsa-miR-106b-5p  |
| rs4744671  | TJP2       | hsa-let-7b-5p    |
| rs886424   | NCRNA00243 | hsa-miR-29b-2-5p |
| rs6079325  | NSFL1C     | hsa-let-7b-5p    |
| rs11980379 | IKZF1      | hsa-miR-1254     |
| rs227938   | CCDC126    | hsa-let-7e-5p    |
| rs227938   | CCDC126    | hsa-let-7g-5p    |
| rs227938   | CCDC126    | hsa-miR-103a-3p  |
| rs227938   | CCDC126    | hsa-miR-106b-3p  |
| rs227938   | CCDC126    | hsa-miR-1254     |
| rs227938   | CCDC126    | hsa-miR-125a-5p  |
| rs2850080  | CBR3       | hsa-miR-1254     |
| rs6471265  | TMEM55A    | hsa-let-7e-5p    |



|            |              |                 |
|------------|--------------|-----------------|
| rs6471265  | TMEM55A      | hsa-miR-106b-3p |
| rs6471265  | TMEM55A      | hsa-miR-1254    |
| rs6471265  | TMEM55A      | hsa-miR-125a-5p |
| rs6471265  | OTUD6B       | hsa-let-7e-5p   |
| rs6471265  | OTUD6B       | hsa-miR-106b-3p |
| rs6471265  | OTUD6B       | hsa-miR-1254    |
| rs6471265  | OTUD6B       | hsa-miR-125a-5p |
| rs9908414  | LOC100130950 | hsa-let-7b-5p   |
| rs9908414  | C17orf87     | hsa-let-7b-5p   |
| rs12191595 | HLA-B        | hsa-miR-146b-5p |
| rs6930572  | HLA-B        | hsa-miR-146b-5p |
| rs2523502  | HLA-B        | hsa-miR-28-3p   |

**Supplementary Table IX: The representative cis-miR-eSNPs of the CHD case-specific miRNA-mRNA pairs that reach CHD association  $p < 0.05$  in CARDIoGRAM GWAS.**

| snpID      | miRNA name  | cis / trans | CHD p value in CARDIOGRAM |
|------------|-------------|-------------|---------------------------|
| rs10892845 | miR_125b_5p | cis         | 7.2E-04                   |
| rs3807598  | miR_196b_5p | cis         | 8.7E-04                   |
| rs12434496 | miR_654_5p  | cis         | 1.0E-03                   |
| rs12434496 | miR_382_5p  | cis         | 1.0E-03                   |
| rs12434496 | miR_433     | cis         | 1.0E-03                   |
| rs12434496 | miR_431_5p  | cis         | 1.0E-03                   |
| rs4936696  | miR_125b_5p | cis         | 1.1E-03                   |
| rs480478   | miR_125b_5p | cis         | 1.3E-03                   |
| rs1450801  | miR_125b_5p | cis         | 1.6E-03                   |
| rs1376225  | miR_125b_5p | cis         | 1.6E-03                   |
| rs1376226  | miR_125b_5p | cis         | 1.6E-03                   |
| rs11218638 | miR_125b_5p | cis         | 1.6E-03                   |
| rs3906964  | miR_125b_5p | cis         | 1.6E-03                   |
| rs2122605  | miR_125b_5p | cis         | 1.6E-03                   |
| rs7939911  | miR_125b_5p | cis         | 1.8E-03                   |
| rs2887839  | miR_125b_5p | cis         | 1.8E-03                   |
| rs9645666  | miR_125b_5p | cis         | 1.8E-03                   |
| rs10233387 | miR_196b_5p | cis         | 2.0E-03                   |
| rs7929357  | miR_125b_5p | cis         | 2.0E-03                   |
| rs1784613  | miR_125b_5p | cis         | 2.1E-03                   |
| rs7129087  | miR_125b_5p | cis         | 2.1E-03                   |
| rs4320961  | miR_125b_5p | cis         | 2.3E-03                   |
| rs2189239  | miR_196b_5p | cis         | 2.9E-03                   |
| rs10790505 | miR_125b_5p | cis         | 3.1E-03                   |
| rs7106224  | miR_125b_5p | cis         | 3.2E-03                   |
| rs10160528 | miR_125b_5p | cis         | 3.4E-03                   |
| rs1190815  | miR_382_5p  | cis         | 3.4E-03                   |
| rs1190815  | miR_654_5p  | cis         | 3.4E-03                   |
| rs1993042  | miR_125b_5p | cis         | 3.4E-03                   |
| rs2370741  | miR_125b_5p | cis         | 3.8E-03                   |
| rs17359474 | miR_196b_5p | cis         | 4.0E-03                   |
| rs2158710  | miR_196b_5p | cis         | 4.0E-03                   |
| rs4905999  | miR_433     | cis         | 4.0E-03                   |
| rs4905999  | miR_382_5p  | cis         | 4.0E-03                   |
| rs4905999  | miR_654_5p  | cis         | 4.0E-03                   |
| rs11218628 | miR_125b_5p | cis         | 4.5E-03                   |
| rs12897601 | miR_433     | cis         | 4.9E-03                   |

|            |             |     |         |
|------------|-------------|-----|---------|
| rs12897601 | miR_431_5p  | cis | 4.9E-03 |
| rs12897601 | miR_654_5p  | cis | 4.9E-03 |
| rs12897601 | miR_382_5p  | cis | 4.9E-03 |
| rs7155649  | miR_382_5p  | cis | 5.9E-03 |
| rs7155649  | miR_433     | cis | 5.9E-03 |
| rs7155649  | miR_654_5p  | cis | 5.9E-03 |
| rs11763033 | miR_196b_5p | cis | 6.5E-03 |
| rs7141210  | miR_431_5p  | cis | 6.9E-03 |
| rs7141210  | miR_433     | cis | 6.9E-03 |
| rs7141210  | miR_654_5p  | cis | 6.9E-03 |
| rs7141210  | miR_329     | cis | 6.9E-03 |
| rs7141210  | miR_654_5p  | cis | 6.9E-03 |
| rs7141210  | miR_329     | cis | 6.9E-03 |
| rs7141210  | miR_329     | cis | 6.9E-03 |
| rs7141210  | miR_382_5p  | cis | 6.9E-03 |
| rs7141210  | miR_329     | cis | 6.9E-03 |
| rs2285724  | miR_196b_5p | cis | 7.5E-03 |
| rs10085570 | miR_196b_5p | cis | 8.2E-03 |
| rs12882815 | miR_382_5p  | cis | 8.6E-03 |
| rs12882815 | miR_329     | cis | 8.6E-03 |
| rs12882815 | miR_654_5p  | cis | 8.6E-03 |
| rs12882815 | miR_431_5p  | cis | 8.6E-03 |
| rs12882815 | miR_329     | cis | 8.6E-03 |
| rs12882815 | miR_329     | cis | 8.6E-03 |
| rs12882815 | miR_329     | cis | 8.6E-03 |
| rs12882815 | miR_433     | cis | 8.6E-03 |
| rs12882815 | miR_654_5p  | cis | 8.6E-03 |
| rs12147987 | miR_382_5p  | cis | 9.2E-03 |
| rs12147987 | miR_654_5p  | cis | 9.2E-03 |
| rs1216553  | miR_125b_5p | cis | 9.2E-03 |
| rs4722657  | miR_196b_5p | cis | 1.1E-02 |
| rs11763148 | miR_196b_5p | cis | 1.1E-02 |
| rs11071182 | miR_628_3p  | cis | 1.2E-02 |
| rs7140792  | miR_654_5p  | cis | 1.2E-02 |
| rs7140792  | miR_382_5p  | cis | 1.2E-02 |
| rs4722623  | miR_196b_5p | cis | 1.4E-02 |
| rs13243033 | miR_196b_5p | cis | 1.4E-02 |
| rs4722672  | miR_196b_5p | cis | 1.5E-02 |
| rs6968828  | miR_196b_5p | cis | 1.5E-02 |
| rs8041044  | miR_628_3p  | cis | 1.6E-02 |
| rs941571   | miR_382_5p  | cis | 1.6E-02 |

|            |             |     |         |
|------------|-------------|-----|---------|
| rs10228276 | miR_196b_5p | cis | 1.7E-02 |
| rs7812039  | miR_196b_5p | cis | 1.7E-02 |
| rs388468   | miR_130b_5p | cis | 1.8E-02 |
| rs10951154 | miR_196b_5p | cis | 1.8E-02 |
| rs10081212 | miR_196b_5p | cis | 1.8E-02 |
| rs6475539  | miR_31_5p   | cis | 1.8E-02 |
| rs1452654  | miR_31_5p   | cis | 1.8E-02 |
| rs1377192  | miR_31_5p   | cis | 1.9E-02 |
| rs4722659  | miR_196b_5p | cis | 1.9E-02 |
| rs4978124  | miR_31_5p   | cis | 2.0E-02 |
| rs8027135  | miR_628_3p  | cis | 2.0E-02 |
| rs8042642  | miR_628_3p  | cis | 2.0E-02 |
| rs7168882  | miR_628_3p  | cis | 2.0E-02 |
| rs8031507  | miR_628_3p  | cis | 2.0E-02 |
| rs8041885  | miR_628_3p  | cis | 2.0E-02 |
| rs10518810 | miR_628_3p  | cis | 2.0E-02 |
| rs7177888  | miR_628_3p  | cis | 2.0E-02 |
| rs16976307 | miR_628_3p  | cis | 2.1E-02 |
| rs2107063  | miR_196b_5p | cis | 2.1E-02 |
| rs6493781  | miR_628_3p  | cis | 2.1E-02 |
| rs1555406  | miR_654_5p  | cis | 2.1E-02 |
| rs1555406  | miR_382_5p  | cis | 2.1E-02 |
| rs7164984  | miR_628_3p  | cis | 2.1E-02 |
| rs16976314 | miR_628_3p  | cis | 2.2E-02 |
| rs8028482  | miR_628_3p  | cis | 2.2E-02 |
| rs7162724  | miR_628_3p  | cis | 2.2E-02 |
| rs8029077  | miR_628_3p  | cis | 2.2E-02 |
| rs8029258  | miR_628_3p  | cis | 2.3E-02 |
| rs16953240 | miR_628_3p  | cis | 2.3E-02 |
| rs11732    | miR_628_3p  | cis | 2.3E-02 |
| rs12797830 | miR_125b_5p | cis | 2.3E-02 |
| rs1452653  | miR_31_5p   | cis | 2.4E-02 |
| rs1190821  | miR_654_5p  | cis | 2.4E-02 |
| rs1190821  | miR_382_5p  | cis | 2.4E-02 |
| rs8074803  | miR_193a_5p | cis | 2.5E-02 |
| rs7170970  | miR_628_3p  | cis | 2.5E-02 |
| rs774265   | miR_196b_5p | cis | 2.6E-02 |
| rs4906002  | miR_654_5p  | cis | 2.6E-02 |
| rs4906002  | miR_382_5p  | cis | 2.6E-02 |
| rs1190820  | miR_654_5p  | cis | 2.7E-02 |
| rs1190820  | miR_382_5p  | cis | 2.7E-02 |

|            |             |     |         |
|------------|-------------|-----|---------|
| rs11871038 | miR_193a_5p | cis | 2.7E-02 |
| rs12974855 | miR_125a_5p | cis | 2.8E-02 |
| rs7181999  | miR_628_3p  | cis | 2.8E-02 |
| rs2104070  | miR_382_5p  | cis | 2.9E-02 |
| rs2104070  | miR_654_5p  | cis | 2.9E-02 |
| rs12417949 | miR_125b_5p | cis | 2.9E-02 |
| rs8034029  | miR_628_3p  | cis | 3.0E-02 |
| rs9909884  | miR_152     | cis | 3.0E-02 |
| rs1190818  | miR_382_5p  | cis | 3.2E-02 |
| rs1190818  | miR_654_5p  | cis | 3.2E-02 |
| rs2140998  | miR_196b_5p | cis | 3.3E-02 |
| rs7341470  | miR_196b_5p | cis | 3.3E-02 |
| rs6575800  | miR_654_5p  | cis | 3.4E-02 |
| rs6575800  | miR_382_5p  | cis | 3.4E-02 |
| rs10147404 | miR_382_5p  | cis | 3.5E-02 |
| rs10147404 | miR_654_5p  | cis | 3.5E-02 |
| rs8012970  | miR_329     | cis | 3.5E-02 |
| rs8012970  | miR_431_5p  | cis | 3.5E-02 |
| rs8012970  | miR_654_5p  | cis | 3.5E-02 |
| rs8012970  | miR_329     | cis | 3.5E-02 |
| rs8012970  | miR_382_5p  | cis | 3.5E-02 |
| rs8012970  | miR_654_5p  | cis | 3.5E-02 |
| rs8012970  | miR_329     | cis | 3.5E-02 |
| rs8012970  | miR_433     | cis | 3.5E-02 |
| rs8012970  | miR_329     | cis | 3.5E-02 |
| rs706017   | miR_196b_5p | cis | 3.5E-02 |
| rs1562996  | miR_31_5p   | cis | 3.5E-02 |
| rs7810502  | miR_196b_5p | cis | 3.5E-02 |
| rs9909665  | miR_193a_5p | cis | 3.5E-02 |
| rs1077028  | miR_654_5p  | cis | 3.7E-02 |
| rs1077028  | miR_382_5p  | cis | 3.7E-02 |
| rs8012350  | miR_654_5p  | cis | 3.8E-02 |
| rs8012350  | miR_382_5p  | cis | 3.8E-02 |
| rs17099614 | miR_329     | cis | 3.8E-02 |
| rs17099614 | miR_329     | cis | 3.8E-02 |
| rs17099614 | miR_329     | cis | 3.8E-02 |
| rs17099614 | miR_654_5p  | cis | 3.8E-02 |
| rs17099614 | miR_329     | cis | 3.8E-02 |
| rs17099614 | miR_433     | cis | 3.8E-02 |
| rs17099614 | miR_382_5p  | cis | 3.8E-02 |
| rs17099614 | miR_654_5p  | cis | 3.8E-02 |

|            |             |     |         |
|------------|-------------|-----|---------|
| rs17092961 | miR_125b_5p | cis | 3.8E-02 |
| rs396913   | miR_130b_5p | cis | 4.1E-02 |
| rs7927267  | miR_210     | cis | 4.3E-02 |
| rs2936423  | miR_196b_5p | cis | 4.4E-02 |
| rs11218622 | miR_125b_5p | cis | 4.4E-02 |
| rs17234336 | miR_339_3p  | cis | 4.5E-02 |
| rs6143056  | miR_133a    | cis | 4.5E-02 |
| rs6143056  | miR_133a    | cis | 4.5E-02 |
| rs4073275  | miR_133a    | cis | 4.6E-02 |
| rs4073275  | miR_133a    | cis | 4.6E-02 |
| rs875898   | miR_196b_5p | cis | 4.6E-02 |
| rs10146962 | miR_329     | cis | 4.7E-02 |
| rs10146962 | miR_329     | cis | 4.7E-02 |
| rs10146962 | miR_654_5p  | cis | 4.7E-02 |
| rs10146962 | miR_382_5p  | cis | 4.7E-02 |
| rs10146962 | miR_329     | cis | 4.7E-02 |
| rs10146962 | miR_329     | cis | 4.7E-02 |
| rs10146962 | miR_654_5p  | cis | 4.7E-02 |
| rs10146962 | miR_433     | cis | 4.7E-02 |
| rs10146962 | miR_431_5p  | cis | 4.7E-02 |
| rs11218636 | miR_125b_5p | cis | 4.7E-02 |
| rs1859166  | miR_196b_5p | cis | 4.8E-02 |
| rs17182078 | miR_193a_5p | cis | 4.8E-02 |
| rs10147396 | miR_382_5p  | cis | 4.8E-02 |
| rs10147396 | miR_654_5p  | cis | 4.8E-02 |
| rs3813451  | miR_133a    | cis | 4.8E-02 |
| rs3813451  | miR_133a    | cis | 4.8E-02 |
| rs11160604 | miR_654_5p  | cis | 4.9E-02 |
| rs11160604 | miR_382_5p  | cis | 4.9E-02 |
| rs9912500  | miR_152     | cis | 4.9E-02 |
| rs2522828  | miR_196b_5p | cis | 4.9E-02 |
| rs8005989  | miR_654_5p  | cis | 5.0E-02 |
| rs8005989  | miR_382_5p  | cis | 5.0E-02 |
| rs10892844 | miR_125b_5p | cis | 5.0E-02 |
| rs365112   | miR_193a_5p | cis | 5.0E-02 |

**Supplementary Table X: The representative mRNA-eSNPs from the CHD control-specific miRNA-mRNA pairs that reach CHD association  $p < 0.05$  in CARDIoGRAM GWAS.**

| snpID      | Gene Name | CHD p value in CARDIOGRAM |
|------------|-----------|---------------------------|
| rs7173743  | CTSH      | 1.7E-07                   |
| rs11072810 | CTSH      | 5.2E-07                   |
| rs11871738 | C17orf39  | 3.3E-06                   |
| rs4539564  | CTSH      | 9.5E-06                   |
| rs9890064  | C17orf39  | 1.2E-05                   |
| rs6502629  | C17orf39  | 1.5E-05                   |
| rs6502622  | C17orf39  | 1.5E-05                   |
| rs8065563  | C17orf39  | 1.9E-05                   |
| rs7224619  | C17orf39  | 1.9E-05                   |
| rs7501812  | C17orf39  | 2.2E-05                   |
| rs2184833  | ADAMTSL4  | 2.3E-05                   |
| rs4925094  | C17orf39  | 2.4E-05                   |
| rs6457792  | UHRF1BP1  | 2.6E-05                   |
| rs2230590  | RBM6      | 2.9E-05                   |
| rs1889018  | C17orf39  | 3.0E-05                   |
| rs1052299  | C17orf39  | 3.0E-05                   |
| rs4925114  | C17orf39  | 3.2E-05                   |
| rs9902941  | C17orf39  | 3.2E-05                   |
| rs2777888  | RBM6      | 3.3E-05                   |
| rs1869771  | C17orf39  | 3.5E-05                   |
| rs9913277  | C17orf39  | 3.7E-05                   |
| rs2681781  | RBM6      | 3.9E-05                   |
| rs8065154  | C17orf39  | 4.0E-05                   |
| rs7208561  | C17orf39  | 4.6E-05                   |
| rs7412396  | ADAMTSL4  | 4.7E-05                   |
| rs3183702  | C17orf39  | 4.7E-05                   |
| rs2955359  | C17orf39  | 5.2E-05                   |
| rs4925119  | C17orf39  | 5.4E-05                   |
| rs9897309  | C17orf39  | 5.4E-05                   |
| rs2867301  | ADAMTSL4  | 5.5E-05                   |
| rs6457796  | UHRF1BP1  | 5.9E-05                   |
| rs6163     | C10orf32  | 6.7E-05                   |
| rs2477508  | UHRF1BP1  | 6.8E-05                   |
| rs2814953  | UHRF1BP1  | 6.8E-05                   |
| rs1998702  | UHRF1BP1  | 6.9E-05                   |
| rs12089989 | ADAMTSL4  | 7.0E-05                   |
| rs9469857  | UHRF1BP1  | 7.5E-05                   |

|            |          |         |
|------------|----------|---------|
| rs4919683  | C10orf32 | 7.6E-05 |
| rs2955355  | C17orf39 | 8.0E-05 |
| rs12204265 | UHRF1BP1 | 8.1E-05 |
| rs1336900  | ADAMTSL4 | 8.2E-05 |
| rs9394248  | UHRF1BP1 | 8.3E-05 |
| rs854791   | C17orf39 | 8.3E-05 |
| rs7224617  | C17orf39 | 8.5E-05 |
| rs10947531 | UHRF1BP1 | 9.0E-05 |
| rs4290163  | C10orf32 | 9.0E-05 |
| rs9296129  | UHRF1BP1 | 9.2E-05 |
| rs7096169  | C10orf32 | 9.4E-05 |
| rs3800461  | UHRF1BP1 | 9.6E-05 |
| rs2764211  | UHRF1BP1 | 1.0E-04 |
| rs4072739  | C17orf39 | 1.0E-04 |
| rs9462027  | UHRF1BP1 | 1.0E-04 |
| rs11204697 | ADAMTSL4 | 1.0E-04 |
| rs7774697  | UHRF1BP1 | 1.0E-04 |
| rs2814971  | UHRF1BP1 | 1.1E-04 |
| rs3800458  | UHRF1BP1 | 1.1E-04 |
| rs6906129  | UHRF1BP1 | 1.1E-04 |
| rs205262   | UHRF1BP1 | 1.1E-04 |
| rs854813   | C17orf39 | 1.1E-04 |
| rs7211714  | C17orf39 | 1.1E-04 |
| rs6587518  | ADAMTSL4 | 1.2E-04 |
| rs4925108  | C17orf39 | 1.2E-04 |
| rs2275236  | ADAMTSL4 | 1.2E-04 |
| rs854809   | C17orf39 | 1.2E-04 |
| rs4513788  | UHRF1BP1 | 1.2E-04 |
| rs9462014  | UHRF1BP1 | 1.3E-04 |
| rs11759151 | UHRF1BP1 | 1.3E-04 |
| rs7341267  | UHRF1BP1 | 1.4E-04 |
| rs7341253  | UHRF1BP1 | 1.4E-04 |
| rs998278   | UHRF1BP1 | 1.4E-04 |
| rs2764207  | UHRF1BP1 | 1.4E-04 |
| rs3734268  | UHRF1BP1 | 1.4E-04 |
| rs7755982  | UHRF1BP1 | 1.4E-04 |
| rs7739771  | UHRF1BP1 | 1.4E-04 |
| rs2764206  | UHRF1BP1 | 1.4E-04 |
| rs2814968  | UHRF1BP1 | 1.4E-04 |
| rs2814959  | UHRF1BP1 | 1.4E-04 |
| rs9462015  | UHRF1BP1 | 1.4E-04 |



|            |          |         |
|------------|----------|---------|
| rs2764201  | UHRF1BP1 | 1.4E-04 |
| rs2814966  | UHRF1BP1 | 1.4E-04 |
| rs9462006  | UHRF1BP1 | 1.4E-04 |
| rs820082   | UHRF1BP1 | 1.4E-04 |
| rs12672451 | COG5     | 1.4E-04 |
| rs2814947  | UHRF1BP1 | 1.6E-04 |
| rs9380455  | UHRF1BP1 | 1.6E-04 |
| rs4925125  | C17orf39 | 1.6E-04 |
| rs10738078 | UHRF1BP1 | 1.7E-04 |
| rs4380028  | CTSH     | 1.7E-04 |
| rs2764208  | UHRF1BP1 | 1.7E-04 |
| rs9469909  | UHRF1BP1 | 1.8E-04 |
| rs6924898  | UHRF1BP1 | 1.8E-04 |
| rs2237659  | COG5     | 1.9E-04 |
| rs2296360  | UHRF1BP1 | 1.9E-04 |
| rs752579   | C17orf39 | 1.9E-04 |
| rs2744961  | UHRF1BP1 | 1.9E-04 |
| rs6937314  | UHRF1BP1 | 1.9E-04 |
| rs9469886  | UHRF1BP1 | 2.0E-04 |
| rs2814945  | UHRF1BP1 | 2.0E-04 |
| rs11757370 | UHRF1BP1 | 2.0E-04 |
| rs9469863  | UHRF1BP1 | 2.0E-04 |
| rs7741437  | UHRF1BP1 | 2.0E-04 |
| rs11755420 | UHRF1BP1 | 2.0E-04 |
| rs9462022  | UHRF1BP1 | 2.0E-04 |
| rs7745097  | UHRF1BP1 | 2.1E-04 |
| rs2815004  | UHRF1BP1 | 2.1E-04 |
| rs10786719 | C10orf32 | 2.1E-04 |
| rs7759227  | UHRF1BP1 | 2.1E-04 |
| rs2395598  | UHRF1BP1 | 2.1E-04 |
| rs9462026  | UHRF1BP1 | 2.1E-04 |
| rs7776219  | UHRF1BP1 | 2.1E-04 |
| rs2395604  | UHRF1BP1 | 2.1E-04 |
| rs11868035 | C17orf39 | 2.1E-04 |
| rs9469859  | UHRF1BP1 | 2.1E-04 |
| rs2744957  | UHRF1BP1 | 2.1E-04 |
| rs7755926  | UHRF1BP1 | 2.1E-04 |
| rs2237661  | COG5     | 2.2E-04 |
| rs2237660  | COG5     | 2.2E-04 |
| rs2814970  | UHRF1BP1 | 2.2E-04 |
| rs3734264  | UHRF1BP1 | 2.4E-04 |

|            |          |         |
|------------|----------|---------|
| rs2301801  | COG5     | 2.5E-04 |
| rs6765484  | RBM6     | 2.5E-04 |
| rs2237678  | COG5     | 2.6E-04 |
| rs12951376 | C17orf39 | 2.6E-04 |
| rs2744949  | UHRF1BP1 | 2.6E-04 |
| rs854767   | C17orf39 | 2.7E-04 |
| rs2814992  | UHRF1BP1 | 2.7E-04 |
| rs2814962  | UHRF1BP1 | 3.0E-04 |
| rs2237662  | COG5     | 3.1E-04 |
| rs982447   | COG5     | 3.1E-04 |
| rs8067800  | C17orf39 | 3.1E-04 |
| rs2814984  | UHRF1BP1 | 3.1E-04 |
| rs2712195  | COG5     | 3.2E-04 |
| rs2235569  | UHRF1BP1 | 3.2E-04 |
| rs2237671  | COG5     | 3.2E-04 |
| rs2235568  | UHRF1BP1 | 3.2E-04 |
| rs11123406 | BCL2L11  | 3.4E-04 |
| rs2712230  | COG5     | 3.5E-04 |
| rs2395607  | UHRF1BP1 | 3.5E-04 |
| rs7092200  | C10orf32 | 3.5E-04 |
| rs2701679  | COG5     | 3.6E-04 |
| rs11755266 | UHRF1BP1 | 3.7E-04 |
| rs11713193 | RBM6     | 3.7E-04 |
| rs3801964  | COG5     | 3.7E-04 |
| rs2838340  | RRP1B    | 3.8E-04 |
| rs4925109  | C17orf39 | 3.8E-04 |
| rs2701678  | COG5     | 3.8E-04 |
| rs17154091 | COG5     | 3.8E-04 |
| rs10519219 | CTSH     | 3.9E-04 |
| rs2701685  | COG5     | 3.9E-04 |
| rs3801966  | COG5     | 3.9E-04 |
| rs412392   | UHRF1BP1 | 4.1E-04 |
| rs188190   | UHRF1BP1 | 4.3E-04 |
| rs205286   | UHRF1BP1 | 4.3E-04 |
| rs205283   | UHRF1BP1 | 4.3E-04 |
| rs2237668  | COG5     | 4.5E-04 |
| rs9905728  | C17orf39 | 4.5E-04 |
| rs9469913  | UHRF1BP1 | 4.7E-04 |
| rs9469910  | UHRF1BP1 | 4.7E-04 |
| rs619824   | C10orf32 | 4.9E-04 |
| rs1555773  | UHRF1BP1 | 4.9E-04 |

|            |          |         |
|------------|----------|---------|
| rs7790080  | COG5     | 5.0E-04 |
| rs11535285 | COG5     | 5.2E-04 |
| rs2283038  | COG5     | 5.3E-04 |
| rs10888390 | ADAMTSL4 | 5.4E-04 |
| rs4532960  | C10orf32 | 5.5E-04 |
| rs2955382  | C17orf39 | 5.7E-04 |
| rs2807     | COG5     | 5.9E-04 |
| rs7755822  | UHRF1BP1 | 6.0E-04 |
| rs2814972  | UHRF1BP1 | 6.1E-04 |
| rs16894959 | UHRF1BP1 | 6.2E-04 |
| rs2624839  | RBM6     | 6.2E-04 |
| rs2252551  | UHRF1BP1 | 6.3E-04 |
| rs7788330  | COG5     | 6.4E-04 |
| rs6949634  | COG5     | 6.5E-04 |
| rs205260   | UHRF1BP1 | 6.7E-04 |
| rs284858   | C10orf32 | 6.7E-04 |
| rs9984002  | RRP1B    | 6.8E-04 |
| rs7777950  | COG5     | 6.9E-04 |
| rs2814981  | UHRF1BP1 | 7.2E-04 |
| rs2297786  | C10orf32 | 7.4E-04 |
| rs17153981 | COG5     | 7.5E-04 |
| rs2204833  | COG5     | 7.7E-04 |
| rs2815003  | UHRF1BP1 | 7.8E-04 |
| rs6932930  | UHRF1BP1 | 7.9E-04 |
| rs6802890  | RBM6     | 8.1E-04 |
| rs2237665  | COG5     | 8.1E-04 |
| rs11638372 | CTSH     | 8.4E-04 |
| rs744530   | BCL2L11  | 8.5E-04 |
| rs4887077  | CTSH     | 9.0E-04 |
| rs11756392 | UHRF1BP1 | 9.2E-04 |
| rs11755393 | UHRF1BP1 | 9.5E-04 |
| rs6655975  | ADAMTSL4 | 9.6E-04 |
| rs17437121 | LUZP1    | 9.6E-04 |
| rs6718864  | ALMS1    | 9.6E-04 |
| rs2815005  | UHRF1BP1 | 9.8E-04 |
| rs2526748  | RBM6     | 1.0E-03 |
| rs2395868  | COG5     | 1.0E-03 |
| rs7663650  | SRD5A3   | 1.1E-03 |
| rs3779495  | COG5     | 1.1E-03 |
| rs2744956  | UHRF1BP1 | 1.1E-03 |
| rs2744955  | UHRF1BP1 | 1.1E-03 |

|            |          |         |
|------------|----------|---------|
| rs2814994  | UHRF1BP1 | 1.1E-03 |
| rs2814996  | UHRF1BP1 | 1.1E-03 |
| rs2744954  | UHRF1BP1 | 1.1E-03 |
| rs4307650  | C10orf32 | 1.1E-03 |
| rs4593773  | PLA2G4A  | 1.2E-03 |
| rs4688758  | RBM6     | 1.2E-03 |
| rs3798352  | UHRF1BP1 | 1.2E-03 |
| rs10186133 | IL1RN    | 1.2E-03 |
| rs9469864  | UHRF1BP1 | 1.2E-03 |
| rs2764205  | UHRF1BP1 | 1.2E-03 |
| rs6938239  | UHRF1BP1 | 1.2E-03 |
| rs2838320  | RRP1B    | 1.2E-03 |
| rs2091022  | ALMS1    | 1.2E-03 |
| rs2118377  | ARL6IP6  | 1.2E-03 |
| rs11126396 | ALMS1    | 1.2E-03 |
| rs11587694 | LUZP1    | 1.3E-03 |
| rs11126395 | ALMS1    | 1.3E-03 |
| rs7627003  | SLC6A6   | 1.3E-03 |
| rs7573275  | ALMS1    | 1.3E-03 |
| rs6546820  | ALMS1    | 1.3E-03 |
| rs6759676  | IL1RN    | 1.3E-03 |
| rs11885217 | ALMS1    | 1.3E-03 |
| rs2814985  | UHRF1BP1 | 1.3E-03 |
| rs2838331  | RRP1B    | 1.3E-03 |
| rs2814990  | UHRF1BP1 | 1.4E-03 |
| rs10196402 | ALMS1    | 1.4E-03 |
| rs17154040 | COG5     | 1.4E-03 |
| rs10947508 | UHRF1BP1 | 1.4E-03 |
| rs8131020  | RRP1B    | 1.4E-03 |
| rs6939345  | UHRF1BP1 | 1.4E-03 |
| rs2744942  | UHRF1BP1 | 1.4E-03 |
| rs1522927  | ALMS1    | 1.4E-03 |
| rs854762   | C17orf39 | 1.4E-03 |
| rs3813565  | CTSH     | 1.5E-03 |
| rs3800457  | UHRF1BP1 | 1.5E-03 |
| rs2814983  | UHRF1BP1 | 1.5E-03 |
| rs9886554  | SPAG1    | 1.5E-03 |
| rs10100073 | SPAG1    | 1.5E-03 |
| rs2814944  | UHRF1BP1 | 1.5E-03 |
| rs2253833  | COG5     | 1.6E-03 |
| rs7222480  | C17orf39 | 1.6E-03 |

|            |          |         |
|------------|----------|---------|
| rs11881315 | ACP5     | 1.6E-03 |
| rs2814998  | UHRF1BP1 | 1.7E-03 |
| rs2744937  | UHRF1BP1 | 1.7E-03 |
| rs12670688 | COG5     | 1.7E-03 |
| rs2744977  | UHRF1BP1 | 1.7E-03 |
| rs162379   | RRP1B    | 1.7E-03 |
| rs1052161  | ALMS1    | 1.7E-03 |
| rs10191517 | ALMS1    | 1.7E-03 |
| rs2744964  | UHRF1BP1 | 1.7E-03 |
| rs11869600 | C17orf39 | 1.7E-03 |
| rs1467809  | TIE1     | 1.8E-03 |
| rs11899517 | ALMS1    | 1.8E-03 |
| rs2744971  | UHRF1BP1 | 1.8E-03 |
| rs13100903 | RBM6     | 1.8E-03 |
| rs7756421  | RAB23    | 1.8E-03 |
| rs6546822  | ALMS1    | 1.8E-03 |
| rs12190575 | RAB23    | 1.8E-03 |
| rs2764199  | UHRF1BP1 | 1.9E-03 |
| rs6709853  | ALMS1    | 1.9E-03 |
| rs9855505  | RBM6     | 1.9E-03 |
| rs6713196  | ALMS1    | 1.9E-03 |
| rs9462007  | UHRF1BP1 | 1.9E-03 |
| rs6749625  | BCL2L11  | 2.0E-03 |
| rs6755484  | BCL2L11  | 2.0E-03 |
| rs6706179  | ALMS1    | 2.0E-03 |
| rs2814943  | UHRF1BP1 | 2.0E-03 |
| rs2814950  | UHRF1BP1 | 2.0E-03 |
| rs17304079 | USP4     | 2.1E-03 |
| rs17304079 | RBM6     | 2.1E-03 |
| rs6729866  | RTN4     | 2.1E-03 |
| rs4330127  | ALMS1    | 2.1E-03 |
| rs11649804 | C17orf39 | 2.2E-03 |
| rs2346550  | ARL6IP6  | 2.2E-03 |
| rs8035382  | ADAL     | 2.2E-03 |
| rs10198301 | ALMS1    | 2.2E-03 |
| rs6546824  | ALMS1    | 2.2E-03 |
| rs639228   | PGM2L1   | 2.2E-03 |
| rs2744974  | UHRF1BP1 | 2.2E-03 |
| rs2814954  | UHRF1BP1 | 2.3E-03 |
| rs599605   | PGM2L1   | 2.3E-03 |
| rs1444410  | NFE2L2   | 2.3E-03 |

|            |          |         |
|------------|----------|---------|
| rs11398    | RAB23    | 2.3E-03 |
| rs4074643  | C17orf39 | 2.4E-03 |
| rs8129601  | RRP1B    | 2.4E-03 |
| rs12539895 | COG5     | 2.4E-03 |
| rs2329442  | RRP1B    | 2.5E-03 |
| rs6716776  | ALMS1    | 2.5E-03 |
| rs6936177  | UHRF1BP1 | 2.6E-03 |
| rs757110   | NUCB2    | 2.6E-03 |
| rs2744973  | UHRF1BP1 | 2.7E-03 |
| rs11639372 | CTSH     | 2.7E-03 |
| rs12076751 | TIE1     | 2.7E-03 |
| rs16898280 | SPAG1    | 2.7E-03 |
| rs2744968  | UHRF1BP1 | 2.7E-03 |
| rs1589576  | ALMS1    | 2.7E-03 |
| rs2233669  | PHB      | 2.8E-03 |
| rs13390825 | RTN4     | 2.8E-03 |
| rs10198549 | ALMS1    | 2.8E-03 |
| rs162344   | RRP1B    | 2.8E-03 |
| rs3800018  | RAB23    | 2.9E-03 |
| rs4259246  | UHRF1BP1 | 2.9E-03 |
| rs4841601  | FDFT1    | 2.9E-03 |
| rs17724992 | PGPEP1   | 2.9E-03 |
| rs2744972  | UHRF1BP1 | 2.9E-03 |
| rs7156717  | POLE2    | 3.0E-03 |
| rs6494383  | TPM1     | 3.0E-03 |
| rs4641966  | ALMS1    | 3.0E-03 |
| rs10273733 | COG5     | 3.0E-03 |
| rs7573719  | ALMS1    | 3.1E-03 |
| rs7756405  | UHRF1BP1 | 3.2E-03 |
| rs7604588  | ALMS1    | 3.2E-03 |
| rs11758426 | UHRF1BP1 | 3.2E-03 |
| rs10109003 | SPAG1    | 3.2E-03 |
| rs2087319  | SRD5A3   | 3.2E-03 |
| rs9288125  | ARL6IP6  | 3.3E-03 |
| rs641032   | LUZP1    | 3.3E-03 |
| rs2814982  | UHRF1BP1 | 3.3E-03 |
| rs2178497  | COG5     | 3.3E-03 |
| rs7560272  | ALMS1    | 3.4E-03 |
| rs10955226 | SPAG1    | 3.5E-03 |
| rs1522926  | ALMS1    | 3.5E-03 |
| rs2744963  | UHRF1BP1 | 3.5E-03 |

|            |          |         |
|------------|----------|---------|
| rs2929275  | ADAL     | 3.5E-03 |
| rs2421489  | ALMS1    | 3.7E-03 |
| rs515926   | MARCKS   | 3.7E-03 |
| rs162367   | RRP1B    | 3.7E-03 |
| rs2782650  | TIE1     | 3.7E-03 |
| rs652941   | TIE1     | 3.8E-03 |
| rs9469917  | UHRF1BP1 | 3.8E-03 |
| rs4346412  | ALMS1    | 3.8E-03 |
| rs3171980  | ARL6IP6  | 3.9E-03 |
| rs2023685  | COG5     | 4.0E-03 |
| rs12472502 | ALMS1    | 4.0E-03 |
| rs10100087 | SPAG1    | 4.0E-03 |
| rs6729468  | ALMS1    | 4.0E-03 |
| rs2744966  | UHRF1BP1 | 4.0E-03 |
| rs6744697  | ALMS1    | 4.0E-03 |
| rs2744967  | UHRF1BP1 | 4.1E-03 |
| rs6546862  | ALMS1    | 4.3E-03 |
| rs7773293  | MARCKS   | 4.3E-03 |
| rs17450586 | HP1BP3   | 4.3E-03 |
| rs2251804  | TIE1     | 4.3E-03 |
| rs13059624 | ST3GAL6  | 4.3E-03 |
| rs6744548  | RTN4     | 4.3E-03 |
| rs7578265  | NFE2L2   | 4.4E-03 |
| rs6740173  | ALMS1    | 4.4E-03 |
| rs10757606 | C9orf66  | 4.4E-03 |
| rs7586361  | ALMS1    | 4.4E-03 |
| rs1403412  | ALMS1    | 4.5E-03 |
| rs7222591  | PHB      | 4.6E-03 |
| rs7582270  | DYSF     | 4.6E-03 |
| rs12215331 | UHRF1BP1 | 4.6E-03 |
| rs7578493  | NFE2L2   | 4.7E-03 |
| rs12898    | FDFT1    | 4.7E-03 |
| rs6994382  | SPAG1    | 5.1E-03 |
| rs1996371  | CTSH     | 5.1E-03 |
| rs1334973  | TIE1     | 5.1E-03 |
| rs839993   | TIE1     | 5.1E-03 |
| rs7785892  | COG5     | 5.1E-03 |
| rs4925138  | C17orf39 | 5.2E-03 |
| rs11688718 | ALMS1    | 5.2E-03 |
| rs6778945  | TMEM39A  | 5.2E-03 |
| rs4818859  | RRP1B    | 5.2E-03 |

|            |          |         |
|------------|----------|---------|
| rs2842180  | TIE1     | 5.4E-03 |
| rs10753514 | HP1BP3   | 5.4E-03 |
| rs11123410 | BCL2L11  | 5.5E-03 |
| rs3924462  | USP4     | 5.5E-03 |
| rs6725139  | RTN4     | 5.6E-03 |
| rs6495314  | CTSH     | 5.6E-03 |
| rs10193972 | ALMS1    | 5.7E-03 |
| rs16898286 | SPAG1    | 5.8E-03 |
| rs11740656 | CENPK    | 6.0E-03 |
| rs12373678 | KIAA1841 | 6.0E-03 |
| rs2520245  | COG5     | 6.0E-03 |
| rs10061042 | CENPK    | 6.1E-03 |
| rs11130199 | USP4     | 6.1E-03 |
| rs6875231  | CENPK    | 6.1E-03 |
| rs28126    | CENPK    | 6.1E-03 |
| rs10274041 | COG5     | 6.2E-03 |
| rs1077394  | AIF1     | 6.2E-03 |
| rs3801944  | COG5     | 6.2E-03 |
| rs6546838  | ALMS1    | 6.2E-03 |
| rs2808     | COG5     | 6.2E-03 |
| rs847852   | UHRF1BP1 | 6.2E-03 |
| rs149514   | CENPK    | 6.3E-03 |
| rs9382695  | RAB23    | 6.3E-03 |
| rs7061     | RBM6     | 6.3E-03 |
| rs839768   | TIE1     | 6.3E-03 |
| rs7760349  | RAB23    | 6.3E-03 |
| rs2712197  | COG5     | 6.4E-03 |
| rs658976   | PGM2L1   | 6.4E-03 |
| rs6701919  | LUZP1    | 6.5E-03 |
| rs6720094  | ALMS1    | 6.5E-03 |
| rs1736090  | FDFT1    | 6.5E-03 |
| rs468974   | CENPK    | 6.6E-03 |
| rs6695218  | HP1BP3   | 6.6E-03 |
| rs7801952  | H2AFV    | 6.6E-03 |
| rs10111982 | SPAG1    | 6.7E-03 |
| rs854787   | C17orf39 | 6.7E-03 |
| rs6466579  | TES      | 6.7E-03 |
| rs12649925 | SRD5A3   | 6.7E-03 |
| rs12478346 | ALMS1    | 6.7E-03 |
| rs8069024  | MXRA7    | 6.8E-03 |
| rs10234355 | COG5     | 6.8E-03 |



|            |           |         |
|------------|-----------|---------|
| rs8112449  | ICAM3     | 6.9E-03 |
| rs722993   | LUZP1     | 6.9E-03 |
| rs1032217  | CNTLN     | 7.0E-03 |
| rs153847   | ANKRD32   | 7.1E-03 |
| rs9469890  | UHRF1BP1  | 7.1E-03 |
| rs10865398 | ALMS1     | 7.1E-03 |
| rs2240769  | MXRA7     | 7.1E-03 |
| rs5215     | NUCB2     | 7.2E-03 |
| rs2894475  | COG5      | 7.2E-03 |
| rs2862162  | DDI2      | 7.3E-03 |
| rs2520263  | COG5      | 7.4E-03 |
| rs945425   | DDI2      | 7.6E-03 |
| rs36133    | CENPK     | 7.6E-03 |
| rs586566   | DCPS      | 7.7E-03 |
| rs586566   | TIRAP     | 7.7E-03 |
| rs4945300  | GAB2      | 7.8E-03 |
| rs6976316  | TES       | 7.8E-03 |
| rs37345    | CENPK     | 7.8E-03 |
| rs2150402  | C21orf7   | 7.8E-03 |
| rs2313275  | let_7b_5p | 7.9E-03 |
| rs13008860 | ALMS1     | 7.9E-03 |
| rs3823438  | UHRF1BP1  | 8.0E-03 |
| rs2901438  | ALMS1     | 8.0E-03 |
| rs10883855 | C10orf32  | 8.1E-03 |
| rs854793   | C17orf39  | 8.1E-03 |
| rs986633   | CPNE3     | 8.1E-03 |
| rs13386124 | ALMS1     | 8.2E-03 |
| rs33395    | CENPK     | 8.2E-03 |
| rs9804722  | HEBP1     | 8.2E-03 |
| rs11724904 | SLAIN2    | 8.3E-03 |
| rs9807961  | ALMS1     | 8.3E-03 |
| rs10165862 | ALMS1     | 8.4E-03 |
| rs3800473  | UHRF1BP1  | 8.4E-03 |
| rs10146912 | POLE2     | 8.4E-03 |
| rs2814993  | UHRF1BP1  | 8.5E-03 |
| rs17405606 | COG5      | 8.5E-03 |
| rs6546835  | ALMS1     | 8.5E-03 |
| rs154861   | CENPK     | 8.5E-03 |
| rs1554483  | SRD5A3    | 8.5E-03 |
| rs6761276  | IL1RN     | 8.5E-03 |
| rs12465867 | ALMS1     | 8.5E-03 |

|            |          |         |
|------------|----------|---------|
| rs1473248  | TMEM91   | 8.7E-03 |
| rs1473248  | EXOSC5   | 8.7E-03 |
| rs7615318  | RBM6     | 8.7E-03 |
| rs7615318  | USP4     | 8.7E-03 |
| rs12995433 | ALMS1    | 8.7E-03 |
| rs2421545  | ALMS1    | 8.7E-03 |
| rs2421546  | ALMS1    | 8.8E-03 |
| rs2421548  | ALMS1    | 8.8E-03 |
| rs4852927  | ALMS1    | 8.8E-03 |
| rs2304240  | ICAM3    | 9.0E-03 |
| rs6730785  | ALMS1    | 9.0E-03 |
| rs512577   | TIRAP    | 9.0E-03 |
| rs7608328  | ALMS1    | 9.3E-03 |
| rs6749680  | ALMS1    | 9.3E-03 |
| rs6706235  | ALMS1    | 9.3E-03 |
| rs12676995 | FDFT1    | 9.3E-03 |
| rs12504300 | SRD5A3   | 9.3E-03 |
| rs6546829  | ALMS1    | 9.7E-03 |
| rs2248465  | COG5     | 9.7E-03 |
| rs1688072  | IL1RN    | 9.7E-03 |
| rs11126399 | ALMS1    | 9.7E-03 |
| rs12648271 | SRD5A3   | 9.8E-03 |
| rs6774354  | RBM6     | 9.8E-03 |
| rs11598702 | C10orf32 | 9.8E-03 |
| rs259743   | CENPK    | 9.8E-03 |
| rs6843722  | SRD5A3   | 9.8E-03 |
| rs1046778  | C10orf32 | 9.9E-03 |
| rs13396983 | BCL2L11  | 9.9E-03 |
| rs8039242  | TPM1     | 1.0E-02 |
| rs6710659  | ALMS1    | 1.0E-02 |
| rs9642786  | SPAG1    | 1.0E-02 |
| rs2231940  | EXOSC5   | 1.0E-02 |
| rs6753785  | BCL2L11  | 1.0E-02 |
| rs152068   | CENPK    | 1.0E-02 |
| rs10512987 | IL20RB   | 1.0E-02 |
| rs154853   | CENPK    | 1.0E-02 |
| rs467976   | CENPK    | 1.0E-02 |
| rs1544336  | COG5     | 1.0E-02 |
| rs260041   | CENPK    | 1.0E-02 |
| rs616130   | BCL2L11  | 1.0E-02 |
| rs2056486  | ALMS1    | 1.0E-02 |

|            |        |         |
|------------|--------|---------|
| rs7503511  | CDC27  | 1.1E-02 |
| rs4864996  | SRD5A3 | 1.1E-02 |
| rs10496191 | ALMS1  | 1.1E-02 |
| rs987391   | COG5   | 1.1E-02 |
| rs4727681  | COG5   | 1.1E-02 |
| rs10251808 | COG5   | 1.1E-02 |
| rs12673675 | COG5   | 1.1E-02 |
| rs37343    | CENPK  | 1.1E-02 |
| rs152066   | CENPK  | 1.1E-02 |
| rs260044   | CENPK  | 1.1E-02 |
| rs154864   | CENPK  | 1.1E-02 |
| rs27144    | CENPK  | 1.1E-02 |
| rs152071   | CENPK  | 1.1E-02 |
| rs154866   | CENPK  | 1.1E-02 |
| rs152070   | CENPK  | 1.1E-02 |
| rs10143848 | CDKL1  | 1.1E-02 |
| rs6849474  | SRD5A3 | 1.1E-02 |
| rs2520277  | COG5   | 1.1E-02 |
| rs154955   | CENPK  | 1.1E-02 |
| rs2237670  | COG5   | 1.1E-02 |
| rs4852976  | ALMS1  | 1.1E-02 |
| rs12667527 | COG5   | 1.1E-02 |
| rs4730245  | COG5   | 1.1E-02 |
| rs2237672  | COG5   | 1.1E-02 |
| rs2237673  | COG5   | 1.1E-02 |
| rs7574291  | ALMS1  | 1.1E-02 |
| rs11133389 | SRD5A3 | 1.1E-02 |
| rs594484   | UCP2   | 1.1E-02 |
| rs10899556 | GAB2   | 1.1E-02 |
| rs9833162  | IL20RB | 1.1E-02 |
| rs2520269  | COG5   | 1.1E-02 |
| rs11000440 | NUDT13 | 1.1E-02 |
| rs1015411  | COG5   | 1.1E-02 |
| rs3813227  | ALMS1  | 1.1E-02 |
| rs4864543  | SRD5A3 | 1.1E-02 |
| rs2520271  | COG5   | 1.1E-02 |
| rs402552   | CENPK  | 1.1E-02 |
| rs27596    | CENPK  | 1.1E-02 |
| rs7658446  | SRD5A3 | 1.2E-02 |
| rs2561218  | CENPK  | 1.2E-02 |
| rs2712191  | COG5   | 1.2E-02 |

|            |           |         |
|------------|-----------|---------|
| rs2520265  | COG5      | 1.2E-02 |
| rs1556581  | TIE1      | 1.2E-02 |
| rs2520268  | COG5      | 1.2E-02 |
| rs13124436 | SRD5A3    | 1.2E-02 |
| rs3094383  | COG5      | 1.2E-02 |
| rs2520260  | COG5      | 1.2E-02 |
| rs2782643  | TIE1      | 1.2E-02 |
| rs2236653  | TIRAP     | 1.2E-02 |
| rs378712   | CENPK     | 1.2E-02 |
| rs4625     | RBM6      | 1.2E-02 |
| rs11133403 | SRD5A3    | 1.2E-02 |
| rs6007891  | TRMU      | 1.2E-02 |
| rs986994   | COG5      | 1.2E-02 |
| rs11753610 | HIST1H2AE | 1.2E-02 |
| rs17138365 | TES       | 1.2E-02 |
| rs12500837 | SRD5A3    | 1.2E-02 |
| rs27143    | CENPK     | 1.2E-02 |
| rs2736428  | AIF1      | 1.2E-02 |
| rs136287   | DUSP18    | 1.2E-02 |
| rs2035691  | SRD5A3    | 1.2E-02 |
| rs12374699 | TES       | 1.2E-02 |
| rs13140173 | SRD5A3    | 1.2E-02 |
| rs13201608 | MAN1A1    | 1.2E-02 |
| rs2918945  | ADAL      | 1.3E-02 |
| rs7457184  | TES       | 1.3E-02 |
| rs972501   | CENPK     | 1.3E-02 |
| rs1370498  | ARL6IP6   | 1.3E-02 |
| rs2883059  | RBM6      | 1.3E-02 |
| rs1061474  | RBM6      | 1.3E-02 |
| rs2520241  | COG5      | 1.3E-02 |
| rs3805382  | SRD5A3    | 1.3E-02 |
| rs12049823 | PGM2L1    | 1.3E-02 |
| rs2712201  | COG5      | 1.3E-02 |
| rs2237677  | COG5      | 1.3E-02 |
| rs7513964  | DEGS1     | 1.3E-02 |
| rs6546827  | ALMS1     | 1.3E-02 |
| rs10501429 | GAB2      | 1.3E-02 |
| rs37350    | CENPK     | 1.3E-02 |
| rs8133276  | RRP1B     | 1.3E-02 |
| rs27137    | CENPK     | 1.3E-02 |
| rs7210     | ALMS1     | 1.3E-02 |

|            |          |         |
|------------|----------|---------|
| rs2412648  | SRD5A3   | 1.3E-02 |
| rs27394    | CENPK    | 1.3E-02 |
| rs7154992  | POLE2    | 1.4E-02 |
| rs37348    | CENPK    | 1.4E-02 |
| rs13116035 | SRD5A3   | 1.4E-02 |
| rs2253271  | COG5     | 1.4E-02 |
| rs13384952 | ALMS1    | 1.4E-02 |
| rs16844819 | DEGS1    | 1.4E-02 |
| rs10946403 | E2F3     | 1.4E-02 |
| rs11638844 | CTSH     | 1.4E-02 |
| rs1105664  | RAC1     | 1.4E-02 |
| rs7644471  | IL20RB   | 1.4E-02 |
| rs10786706 | C10orf32 | 1.4E-02 |
| rs6546826  | ALMS1    | 1.4E-02 |
| rs9858280  | RBM6     | 1.4E-02 |
| rs10849835 | P2RX4    | 1.4E-02 |
| rs4788186  | RABEP2   | 1.4E-02 |
| rs2520249  | COG5     | 1.4E-02 |
| rs4727680  | COG5     | 1.4E-02 |
| rs11133373 | SRD5A3   | 1.4E-02 |
| rs7532266  | LUZP1    | 1.4E-02 |
| rs2856237  | RBM6     | 1.4E-02 |
| rs6789329  | IL20RB   | 1.4E-02 |
| rs166329   | CENPK    | 1.5E-02 |
| rs17664531 | C9orf66  | 1.5E-02 |
| rs2247337  | GZF1     | 1.5E-02 |
| rs1007837  | GAB2     | 1.5E-02 |
| rs7562047  | ALMS1    | 1.5E-02 |
| rs3807971  | TES      | 1.5E-02 |
| rs2237676  | COG5     | 1.5E-02 |
| rs2282226  | TIE1     | 1.5E-02 |
| rs12672307 | TES      | 1.5E-02 |
| rs2842195  | TIE1     | 1.5E-02 |
| rs3761347  | IFNGR2   | 1.5E-02 |
| rs4894243  | NFE2L2   | 1.5E-02 |
| rs33394    | CENPK    | 1.5E-02 |
| rs12510400 | SRD5A3   | 1.5E-02 |
| rs4864999  | SRD5A3   | 1.5E-02 |
| rs1293288  | FDFT1    | 1.5E-02 |
| rs3761980  | MAPK14   | 1.5E-02 |
| rs3761980  | SLC26A8  | 1.5E-02 |

|            |           |         |
|------------|-----------|---------|
| rs4864997  | SRD5A3    | 1.5E-02 |
| rs1290552  | MAN1A2    | 1.6E-02 |
| rs1290552  | FAM46C    | 1.6E-02 |
| rs2346549  | ARL6IP6   | 1.6E-02 |
| rs12644948 | SRD5A3    | 1.6E-02 |
| rs3805151  | SRD5A3    | 1.6E-02 |
| rs1077421  | ADAL      | 1.6E-02 |
| rs2520243  | COG5      | 1.6E-02 |
| rs17830827 | CENPK     | 1.6E-02 |
| rs2057837  | COG5      | 1.6E-02 |
| rs17047430 | let_7b_5p | 1.6E-02 |
| rs12500686 | SRD5A3    | 1.6E-02 |
| rs11133386 | SRD5A3    | 1.6E-02 |
| rs17009372 | ALMS1     | 1.6E-02 |
| rs10858894 | POC1B     | 1.6E-02 |
| rs4340844  | SRD5A3    | 1.6E-02 |
| rs6931514  | E2F3      | 1.6E-02 |
| rs2015454  | BCL2L11   | 1.6E-02 |
| rs6604887  | DEGS1     | 1.6E-02 |
| rs8041377  | CTSH      | 1.7E-02 |
| rs3810175  | TMEM91    | 1.7E-02 |
| rs11570840 | CDKL1     | 1.7E-02 |
| rs7793613  | COG5      | 1.7E-02 |
| rs7794915  | COG5      | 1.7E-02 |
| rs2171618  | SRD5A3    | 1.7E-02 |
| rs11570819 | CDKL1     | 1.7E-02 |
| rs12651640 | SRD5A3    | 1.7E-02 |
| rs1464490  | SRD5A3    | 1.7E-02 |
| rs6971086  | JAZF1     | 1.7E-02 |
| rs17154077 | COG5      | 1.7E-02 |
| rs1388970  | DEGS1     | 1.7E-02 |
| rs10517346 | SRD5A3    | 1.7E-02 |
| rs7598681  | KIAA1841  | 1.7E-02 |
| rs2107713  | COG5      | 1.7E-02 |
| rs10813156 | C9orf66   | 1.7E-02 |
| rs10276604 | COG5      | 1.7E-02 |
| rs1163085  | C10orf32  | 1.7E-02 |
| rs12274970 | UCP2      | 1.7E-02 |
| rs1290539  | MAN1A2    | 1.7E-02 |
| rs1290539  | FAM46C    | 1.7E-02 |
| rs6747145  | ALMS1     | 1.7E-02 |

|            |          |         |
|------------|----------|---------|
| rs797172   | CSDA     | 1.7E-02 |
| rs10409485 | TMEM91   | 1.8E-02 |
| rs503593   | MARCKS   | 1.8E-02 |
| rs6048891  | GZF1     | 1.8E-02 |
| rs13084692 | ST3GAL6  | 1.8E-02 |
| rs406268   | CNTLN    | 1.8E-02 |
| rs2820232  | UHRF1BP1 | 1.8E-02 |
| rs1695739  | TIRAP    | 1.8E-02 |
| rs1695739  | DCPS     | 1.8E-02 |
| rs246400   | CENPK    | 1.8E-02 |
| rs6459182  | RAB23    | 1.8E-02 |
| rs1586555  | SRD5A3   | 1.8E-02 |
| rs11133377 | SRD5A3   | 1.8E-02 |
| rs4803468  | TMEM91   | 1.8E-02 |
| rs10517344 | SRD5A3   | 1.8E-02 |
| rs922691   | CTSH     | 1.9E-02 |
| rs12506788 | SRD5A3   | 1.9E-02 |
| rs763386   | COG5     | 1.9E-02 |
| rs11880539 | TMEM91   | 1.9E-02 |
| rs11880539 | EXOSC5   | 1.9E-02 |
| rs17590975 | CENPK    | 1.9E-02 |
| rs2066735  | COG5     | 1.9E-02 |
| rs2211651  | LEPR     | 1.9E-02 |
| rs17424123 | SPAG1    | 1.9E-02 |
| rs10496325 | ANKRD36B | 1.9E-02 |
| rs6683927  | DEGS1    | 1.9E-02 |
| rs10462032 | SRD5A3   | 1.9E-02 |
| rs4944893  | UCP2     | 1.9E-02 |
| rs10853751 | EXOSC5   | 1.9E-02 |
| rs10853751 | TMEM91   | 1.9E-02 |
| rs2688621  | NUDT13   | 1.9E-02 |
| rs10923294 | MAN1A2   | 1.9E-02 |
| rs462907   | CENPK    | 1.9E-02 |
| rs1186828  | KIAA1841 | 1.9E-02 |
| rs2253269  | COG5     | 1.9E-02 |
| rs13114841 | SRD5A3   | 1.9E-02 |
| rs939823   | SRD5A3   | 2.0E-02 |
| rs10148498 | CDKL1    | 2.0E-02 |
| rs502621   | SF3A3    | 2.0E-02 |
| rs2889195  | LEPR     | 2.0E-02 |
| rs9356743  | E2F3     | 2.0E-02 |

|            |          |         |
|------------|----------|---------|
| rs7576824  | ALMS1    | 2.0E-02 |
| rs13146987 | SRD5A3   | 2.0E-02 |
| rs2307064  | LXN      | 2.0E-02 |
| rs7677085  | SRD5A3   | 2.0E-02 |
| rs12510681 | SRD5A3   | 2.0E-02 |
| rs197265   | DPP4     | 2.0E-02 |
| rs3805155  | SRD5A3   | 2.0E-02 |
| rs2712156  | OCIAD1   | 2.0E-02 |
| rs2894466  | COG5     | 2.0E-02 |
| rs7686261  | SRD5A3   | 2.0E-02 |
| rs11133391 | SRD5A3   | 2.0E-02 |
| rs11933797 | SLAIN2   | 2.0E-02 |
| rs9348440  | E2F3     | 2.0E-02 |
| rs6695100  | RAB4A    | 2.0E-02 |
| rs3749237  | RBM6     | 2.0E-02 |
| rs13040567 | GZF1     | 2.0E-02 |
| rs4864547  | SRD5A3   | 2.1E-02 |
| rs4864546  | SRD5A3   | 2.1E-02 |
| rs1163073  | C10orf32 | 2.1E-02 |
| rs3805150  | SRD5A3   | 2.1E-02 |
| rs6138001  | GZF1     | 2.1E-02 |
| rs7756211  | E2F3     | 2.1E-02 |
| rs284662   | TMEM91   | 2.1E-02 |
| rs284662   | EXOSC5   | 2.1E-02 |
| rs7696832  | SRD5A3   | 2.1E-02 |
| rs1317140  | RBM6     | 2.1E-02 |
| rs1317140  | USP4     | 2.1E-02 |
| rs13108499 | SRD5A3   | 2.1E-02 |
| rs11726198 | SRD5A3   | 2.1E-02 |
| rs13152173 | SRD5A3   | 2.1E-02 |
| rs149208   | CENPK    | 2.1E-02 |
| rs11133398 | SRD5A3   | 2.1E-02 |
| rs11133397 | SRD5A3   | 2.1E-02 |
| rs4865011  | SRD5A3   | 2.1E-02 |
| rs13116194 | SRD5A3   | 2.1E-02 |
| rs9615960  | TRMU     | 2.1E-02 |
| rs2304556  | ARL6IP6  | 2.1E-02 |
| rs3805148  | SRD5A3   | 2.1E-02 |
| rs3801948  | COG5     | 2.1E-02 |
| rs6752673  | KIAA1841 | 2.1E-02 |
| rs330061   | PPP1R3B  | 2.1E-02 |



|            |          |         |
|------------|----------|---------|
| rs9308742  | BCL2L11  | 2.2E-02 |
| rs1290558  | MAN1A2   | 2.2E-02 |
| rs10789332 | EPHA10   | 2.2E-02 |
| rs6083190  | GZF1     | 2.2E-02 |
| rs6844449  | UBE2D3   | 2.2E-02 |
| rs17154027 | FDFT1    | 2.2E-02 |
| rs11133378 | SRD5A3   | 2.2E-02 |
| rs11942279 | SRD5A3   | 2.2E-02 |
| rs1032419  | GSTA4    | 2.2E-02 |
| rs4700085  | CENPK    | 2.2E-02 |
| rs3760781  | ACP5     | 2.3E-02 |
| rs6828570  | SRD5A3   | 2.3E-02 |
| rs729211   | C10orf32 | 2.3E-02 |
| rs11105313 | POC1B    | 2.3E-02 |
| rs12567861 | HP1BP3   | 2.3E-02 |
| rs3134603  | PSMB9    | 2.3E-02 |
| rs1047354  | SRD5A3   | 2.3E-02 |
| rs2279458  | SRD5A3   | 2.3E-02 |
| rs10947953 | TREM1    | 2.3E-02 |
| rs4917386  | C10orf32 | 2.3E-02 |
| rs202380   | ZNF334   | 2.3E-02 |
| rs4729566  | PVRIG    | 2.3E-02 |
| rs4729566  | ZSCAN21  | 2.3E-02 |
| rs7778270  | COG5     | 2.3E-02 |
| rs1007690  | TIRAP    | 2.4E-02 |
| rs2527902  | ZSCAN21  | 2.4E-02 |
| rs11977187 | COG5     | 2.4E-02 |
| rs7598660  | ALMS1    | 2.4E-02 |
| rs4727684  | COG5     | 2.4E-02 |
| rs17346218 | RTN4     | 2.4E-02 |
| rs7778250  | COG5     | 2.4E-02 |
| rs2527900  | ZSCAN21  | 2.4E-02 |
| rs3820500  | FAM46C   | 2.4E-02 |
| rs3820500  | MAN1A2   | 2.4E-02 |
| rs10940043 | CENPK    | 2.4E-02 |
| rs1290551  | MAN1A2   | 2.4E-02 |
| rs3795657  | MAN1A2   | 2.4E-02 |
| rs2307424  | FCER1G   | 2.5E-02 |
| rs12469822 | IL1RN    | 2.5E-02 |
| rs3785499  | C17orf39 | 2.5E-02 |
| rs10184259 | IL1RN    | 2.5E-02 |

|            |          |         |
|------------|----------|---------|
| rs904910   | DDI2     | 2.5E-02 |
| rs6471296  | CPNE3    | 2.5E-02 |
| rs12577525 | NUCB2    | 2.5E-02 |
| rs11933778 | SRD5A3   | 2.5E-02 |
| rs6076084  | GZF1     | 2.5E-02 |
| rs11855406 | CTSH     | 2.5E-02 |
| rs1455942  | OCIAD1   | 2.5E-02 |
| rs1890979  | CDKL1    | 2.5E-02 |
| rs37253    | CENPK    | 2.5E-02 |
| rs42961    | CENPK    | 2.5E-02 |
| rs16831728 | ARL6IP6  | 2.6E-02 |
| rs7774848  | MAN1A1   | 2.6E-02 |
| rs7860253  | C9orf66  | 2.6E-02 |
| rs6667615  | LEPR     | 2.6E-02 |
| rs1352426  | ICAM3    | 2.6E-02 |
| rs11602732 | UCP2     | 2.6E-02 |
| rs11587213 | FCER1G   | 2.6E-02 |
| rs794001   | KLHL5    | 2.6E-02 |
| rs4764043  | HEBP1    | 2.6E-02 |
| rs10856848 | UBE2K    | 2.6E-02 |
| rs3197999  | RBM6     | 2.6E-02 |
| rs1707113  | MAN1A2   | 2.6E-02 |
| rs2870085  | CTSH     | 2.6E-02 |
| rs17298882 | IL20RB   | 2.7E-02 |
| rs11670757 | TMEM91   | 2.7E-02 |
| rs11670757 | EXOSC5   | 2.7E-02 |
| rs37346    | CENPK    | 2.7E-02 |
| rs17842456 | ANKRD36B | 2.7E-02 |
| rs4655795  | LEPR     | 2.7E-02 |
| rs6927955  | MAN1A1   | 2.7E-02 |
| rs7575639  | RTN4     | 2.7E-02 |
| rs552848   | C9orf66  | 2.7E-02 |
| rs11935823 | SRD5A3   | 2.7E-02 |
| rs468754   | CENPK    | 2.7E-02 |
| rs11236042 | PGM2L1   | 2.7E-02 |
| rs6756986  | ANKRD36B | 2.7E-02 |
| rs11105314 | POC1B    | 2.7E-02 |
| rs2983301  | GZF1     | 2.7E-02 |
| rs1013147  | RAB23    | 2.7E-02 |
| rs10858890 | POC1B    | 2.8E-02 |
| rs12022410 | LEPR     | 2.8E-02 |

|            |          |         |
|------------|----------|---------|
| rs3813627  | FCER1G   | 2.8E-02 |
| rs9356746  | E2F3     | 2.8E-02 |
| rs7617304  | LXN      | 2.8E-02 |
| rs302935   | UBE2K    | 2.8E-02 |
| rs10783362 | ATF1     | 2.8E-02 |
| rs10783362 | LIMA1    | 2.8E-02 |
| rs753202   | CSDA     | 2.8E-02 |
| rs11105302 | POC1B    | 2.8E-02 |
| rs2645424  | FDFT1    | 2.8E-02 |
| rs2013012  | PGM1     | 2.8E-02 |
| rs16869914 | TES      | 2.8E-02 |
| rs10089145 | ZDHHC2   | 2.8E-02 |
| rs10031777 | OCIAD1   | 2.8E-02 |
| rs2284997  | PGM1     | 2.8E-02 |
| rs4945261  | GAB2     | 2.8E-02 |
| rs10949013 | RAB23    | 2.9E-02 |
| rs10203833 | ANKRD36B | 2.9E-02 |
| rs639525   | PGM2L1   | 2.9E-02 |
| rs2849025  | LUZP1    | 2.9E-02 |
| rs2510044  | GAB2     | 2.9E-02 |
| rs10866425 | SRD5A3   | 2.9E-02 |
| rs1393786  | IL20RB   | 2.9E-02 |
| rs468821   | CENPK    | 3.0E-02 |
| rs11945371 | SRD5A3   | 3.0E-02 |
| rs13242357 | NCAPG2   | 3.0E-02 |
| rs2070215  | PVRIG    | 3.0E-02 |
| rs2070215  | ZSCAN21  | 3.0E-02 |
| rs10207116 | ANKRD36B | 3.0E-02 |
| rs7589899  | ARL6IP6  | 3.0E-02 |
| rs1531377  | ST3GAL6  | 3.0E-02 |
| rs4145013  | IL1RN    | 3.0E-02 |
| rs740580   | RPS2     | 3.0E-02 |
| rs11883762 | ARL6IP6  | 3.0E-02 |
| rs33396    | CENPK    | 3.0E-02 |
| rs11105309 | POC1B    | 3.0E-02 |
| rs786530   | CENPK    | 3.0E-02 |
| rs2237094  | SLC26A8  | 3.0E-02 |
| rs2237094  | MAPK14   | 3.0E-02 |
| rs37254    | CENPK    | 3.0E-02 |
| rs1054807  | POC1B    | 3.0E-02 |
| rs4679819  | LXN      | 3.1E-02 |

|            |          |         |
|------------|----------|---------|
| rs460262   | CENPK    | 3.1E-02 |
| rs6678033  | LEPR     | 3.1E-02 |
| rs11133400 | SRD5A3   | 3.1E-02 |
| rs4605279  | TMEM91   | 3.1E-02 |
| rs6576996  | ANKRD36B | 3.1E-02 |
| rs389686   | CCNB1    | 3.1E-02 |
| rs566353   | SLC15A3  | 3.1E-02 |
| rs786703   | CENPK    | 3.1E-02 |
| rs13132085 | SRD5A3   | 3.1E-02 |
| rs1446510  | IL1RN    | 3.1E-02 |
| rs9842500  | LXN      | 3.1E-02 |
| rs1557765  | NUCB2    | 3.1E-02 |
| rs11105310 | POC1B    | 3.1E-02 |
| rs7624934  | LXN      | 3.1E-02 |
| rs12468414 | KIAA1841 | 3.1E-02 |
| rs11105325 | POC1B    | 3.2E-02 |
| rs10858896 | POC1B    | 3.2E-02 |
| rs181753   | CENPK    | 3.2E-02 |
| rs11126414 | ALMS1    | 3.2E-02 |
| rs1050331  | H2AFV    | 3.2E-02 |
| rs4660733  | TIE1     | 3.2E-02 |
| rs10858909 | POC1B    | 3.2E-02 |
| rs3741898  | POC1B    | 3.2E-02 |
| rs10858900 | POC1B    | 3.2E-02 |
| rs10899456 | GAB2     | 3.2E-02 |
| rs4842662  | POC1B    | 3.2E-02 |
| rs4842664  | POC1B    | 3.2E-02 |
| rs10858906 | POC1B    | 3.2E-02 |
| rs3825330  | POC1B    | 3.2E-02 |
| rs10416743 | TMEM91   | 3.2E-02 |
| rs2220729  | POC1B    | 3.2E-02 |
| rs2272051  | ALMS1    | 3.3E-02 |
| rs468308   | CENPK    | 3.3E-02 |
| rs13108409 | SRD5A3   | 3.3E-02 |
| rs13447454 | CDC7     | 3.3E-02 |
| rs12705070 | ZSCAN21  | 3.3E-02 |
| rs12705070 | PVRIG    | 3.3E-02 |
| rs3810174  | TMEM91   | 3.3E-02 |
| rs3810174  | EXOSC5   | 3.3E-02 |
| rs8181784  | POC1B    | 3.3E-02 |
| rs187409   | CENPK    | 3.3E-02 |

|            |          |         |
|------------|----------|---------|
| rs10252662 | H2AFV    | 3.4E-02 |
| rs6446298  | RBM6     | 3.4E-02 |
| rs6446298  | CCDC71   | 3.4E-02 |
| rs461534   | CENPK    | 3.4E-02 |
| rs2296569  | C10orf32 | 3.4E-02 |
| rs6738532  | KIAA1841 | 3.4E-02 |
| rs40195    | CENPK    | 3.4E-02 |
| rs9973669  | ANKRD36B | 3.4E-02 |
| rs1061230  | ZSCAN21  | 3.4E-02 |
| rs1061230  | PVRIG    | 3.4E-02 |
| rs2983303  | GZF1     | 3.4E-02 |
| rs37349    | CENPK    | 3.4E-02 |
| rs7828690  | MSRA     | 3.4E-02 |
| rs12933766 | RABEP2   | 3.4E-02 |
| rs1700512  | CENPK    | 3.4E-02 |
| rs4944196  | GAB2     | 3.4E-02 |
| rs938095   | BCL2L11  | 3.4E-02 |
| rs786701   | CENPK    | 3.4E-02 |
| rs27139    | CENPK    | 3.4E-02 |
| rs465675   | CENPK    | 3.4E-02 |
| rs37332    | CENPK    | 3.4E-02 |
| rs36136    | CENPK    | 3.5E-02 |
| rs152060   | CENPK    | 3.5E-02 |
| rs9840571  | LXN      | 3.5E-02 |
| rs36135    | CENPK    | 3.5E-02 |
| rs37330    | CENPK    | 3.5E-02 |
| rs1393787  | IL20RB   | 3.5E-02 |
| rs36134    | CENPK    | 3.5E-02 |
| rs1369324  | CTSH     | 3.5E-02 |
| rs112315   | CENPK    | 3.5E-02 |
| rs27142    | CENPK    | 3.6E-02 |
| rs27560    | CENPK    | 3.6E-02 |
| rs27141    | CENPK    | 3.6E-02 |
| rs27140    | CENPK    | 3.6E-02 |
| rs2450138  | GAB2     | 3.6E-02 |
| rs154943   | CENPK    | 3.6E-02 |
| rs1341491  | MAN1A1   | 3.6E-02 |
| rs12985909 | PGPEP1   | 3.6E-02 |
| rs11765126 | IMPDH1   | 3.6E-02 |
| rs152059   | CENPK    | 3.6E-02 |
| rs154941   | CENPK    | 3.6E-02 |

|            |          |         |
|------------|----------|---------|
| rs41353    | CENPK    | 3.6E-02 |
| rs13403225 | ANKRD36B | 3.6E-02 |
| rs10858885 | POC1B    | 3.6E-02 |
| rs11650467 | MXRA7    | 3.6E-02 |
| rs37338    | CENPK    | 3.6E-02 |
| rs154859   | CENPK    | 3.7E-02 |
| rs2239689  | AIF1     | 3.7E-02 |
| rs17699324 | LXN      | 3.7E-02 |
| rs17132384 | TES      | 3.7E-02 |
| rs245547   | CENPK    | 3.7E-02 |
| rs37337    | CENPK    | 3.7E-02 |
| rs2206734  | E2F3     | 3.7E-02 |
| rs245548   | CENPK    | 3.7E-02 |
| rs1569699  | E2F3     | 3.7E-02 |
| rs7565473  | BCL2L11  | 3.7E-02 |
| rs7950865  | GAB2     | 3.7E-02 |
| rs4540916  | HEBP1    | 3.7E-02 |
| rs6459184  | RAB23    | 3.7E-02 |
| rs2390981  | MPP6     | 3.7E-02 |
| rs154858   | CENPK    | 3.8E-02 |
| rs1320147  | ANKRD36B | 3.8E-02 |
| rs17628530 | MAN1A1   | 3.8E-02 |
| rs154631   | CENPK    | 3.8E-02 |
| rs6895641  | CENPK    | 3.8E-02 |
| rs761845   | GZF1     | 3.8E-02 |
| rs4496335  | IL1RN    | 3.8E-02 |
| rs10946384 | E2F3     | 3.8E-02 |
| rs245549   | CENPK    | 3.8E-02 |
| rs4895788  | PCMT1    | 3.8E-02 |
| rs661356   | C9orf66  | 3.8E-02 |
| rs2206579  | E2F3     | 3.9E-02 |
| rs10747580 | ATF1     | 3.9E-02 |
| rs2272073  | SRD5A3   | 3.9E-02 |
| rs2293479  | PVRIG    | 3.9E-02 |
| rs11771331 | PVRIG    | 3.9E-02 |
| rs11671477 | ZNF544   | 3.9E-02 |
| rs2572023  | ZSCAN21  | 3.9E-02 |
| rs255367   | ANKRD32  | 3.9E-02 |
| rs669571   | CENPK    | 3.9E-02 |
| rs1146298  | FAM46C   | 3.9E-02 |
| rs1146298  | MAN1A2   | 3.9E-02 |

|            |          |         |
|------------|----------|---------|
| rs3749791  | MAPK9    | 3.9E-02 |
| rs2072944  | LUZP1    | 3.9E-02 |
| rs6686248  | SF3A3    | 4.0E-02 |
| rs4852972  | ALMS1    | 4.0E-02 |
| rs9368222  | E2F3     | 4.0E-02 |
| rs7574488  | ANKRD36B | 4.0E-02 |
| rs1827700  | PDCD5    | 4.0E-02 |
| rs2153824  | MAN1A1   | 4.0E-02 |
| rs11105299 | POC1B    | 4.0E-02 |
| rs1437677  | ARL6IP6  | 4.0E-02 |
| rs1318241  | GAB2     | 4.0E-02 |
| rs2071295  | AIF1     | 4.0E-02 |
| rs625525   | CDC7     | 4.0E-02 |
| rs13091236 | ST3GAL6  | 4.0E-02 |
| rs10899527 | GAB2     | 4.0E-02 |
| rs13585    | TRMU     | 4.0E-02 |
| rs3950680  | NUCB2    | 4.1E-02 |
| rs9470222  | MAPK14   | 4.1E-02 |
| rs12276109 | TCP11L1  | 4.1E-02 |
| rs6468712  | SPAG1    | 4.1E-02 |
| rs1088231  | CSDA     | 4.1E-02 |
| rs245554   | CENPK    | 4.1E-02 |
| rs37339    | CENPK    | 4.1E-02 |
| rs10899545 | GAB2     | 4.1E-02 |
| rs7601625  | RTN4     | 4.1E-02 |
| rs10161364 | POC1B    | 4.1E-02 |
| rs10166783 | KIAA1841 | 4.1E-02 |
| rs7935180  | GAB2     | 4.1E-02 |
| rs10858879 | POC1B    | 4.1E-02 |
| rs3912392  | UBE2K    | 4.1E-02 |
| rs2230283  | POC1B    | 4.1E-02 |
| rs245553   | CENPK    | 4.1E-02 |
| rs1872240  | IL20RB   | 4.1E-02 |
| rs245555   | CENPK    | 4.1E-02 |
| rs10161378 | POC1B    | 4.2E-02 |
| rs245550   | CENPK    | 4.2E-02 |
| rs4768878  | ATF1     | 4.2E-02 |
| rs10516289 | BST1     | 4.2E-02 |
| rs12228177 | POC1B    | 4.2E-02 |
| rs2358681  | ICAM3    | 4.2E-02 |
| rs7722983  | CENPK    | 4.2E-02 |

|            |          |         |
|------------|----------|---------|
| rs10882622 | CC2D2B   | 4.2E-02 |
| rs10506972 | POC1B    | 4.2E-02 |
| rs4841339  | MSRA     | 4.2E-02 |
| rs28342    | CENPK    | 4.2E-02 |
| rs2242500  | MACF1    | 4.2E-02 |
| rs17418194 | RTN4     | 4.2E-02 |
| rs6975245  | ARPC1B   | 4.2E-02 |
| rs6845740  | SLAIN2   | 4.2E-02 |
| rs37328    | CENPK    | 4.2E-02 |
| rs6590203  | TIRAP    | 4.2E-02 |
| rs7745079  | FBXO9    | 4.2E-02 |
| rs10161375 | POC1B    | 4.3E-02 |
| rs11169427 | ATF1     | 4.3E-02 |
| rs11169427 | LIMA1    | 4.3E-02 |
| rs2305117  | CENPK    | 4.3E-02 |
| rs706657   | CENPK    | 4.3E-02 |
| rs706658   | CENPK    | 4.3E-02 |
| rs2186245  | LEPR     | 4.3E-02 |
| rs6804230  | LXN      | 4.3E-02 |
| rs786534   | CENPK    | 4.3E-02 |
| rs13120134 | SRD5A3   | 4.3E-02 |
| rs636918   | C9orf66  | 4.3E-02 |
| rs13285641 | NOL8     | 4.3E-02 |
| rs4238104  | ATF1     | 4.3E-02 |
| rs10940040 | CENPK    | 4.3E-02 |
| rs7712178  | CENPK    | 4.3E-02 |
| rs154847   | CENPK    | 4.3E-02 |
| rs4646949  | UHRF1BP1 | 4.3E-02 |
| rs154942   | CENPK    | 4.3E-02 |
| rs402645   | CENPK    | 4.3E-02 |
| rs7756992  | E2F3     | 4.3E-02 |
| rs3803128  | POC1B    | 4.3E-02 |
| rs1008764  | POC1B    | 4.3E-02 |
| rs2412822  | ADAL     | 4.4E-02 |
| rs10899509 | GAB2     | 4.4E-02 |
| rs9649390  | TES      | 4.4E-02 |
| rs154624   | CENPK    | 4.4E-02 |
| rs2525539  | PVRIG    | 4.4E-02 |
| rs10751290 | GAB2     | 4.4E-02 |
| rs6510128  | ZNF544   | 4.4E-02 |
| rs27138    | CENPK    | 4.4E-02 |



|            |         |         |
|------------|---------|---------|
| rs4674     | TMEM91  | 4.4E-02 |
| rs10858867 | POC1B   | 4.4E-02 |
| rs13081671 | IL20RB  | 4.4E-02 |
| rs1962313  | ARL6IP6 | 4.4E-02 |
| rs11943206 | SRD5A3  | 4.4E-02 |
| rs10858865 | POC1B   | 4.4E-02 |
| rs2548130  | RHOBTB3 | 4.5E-02 |
| rs7925034  | GAB2    | 4.5E-02 |
| rs432206   | CENPK   | 4.5E-02 |
| rs1873147  | TPM1    | 4.5E-02 |
| rs10899510 | GAB2    | 4.5E-02 |
| rs13147861 | SRD5A3  | 4.5E-02 |
| rs11570836 | CDKL1   | 4.5E-02 |
| rs11249665 | RNF130  | 4.5E-02 |
| rs10858864 | POC1B   | 4.5E-02 |
| rs11960449 | CENPK   | 4.5E-02 |
| rs10805398 | CENPK   | 4.5E-02 |
| rs10489469 | RAP1A   | 4.5E-02 |
| rs10138451 | CDKL1   | 4.5E-02 |
| rs12111351 | E2F3    | 4.5E-02 |
| rs7111183  | TCP11L1 | 4.5E-02 |
| rs7738223  | AKAP7   | 4.5E-02 |
| rs8180610  | MAN1A1  | 4.5E-02 |
| rs13174535 | CENPK   | 4.5E-02 |
| rs12518963 | CENPK   | 4.5E-02 |
| rs245529   | CENPK   | 4.5E-02 |
| rs6748040  | ALMS1   | 4.5E-02 |
| rs10899536 | GAB2    | 4.5E-02 |
| rs999885   | PVRIG   | 4.5E-02 |
| rs999885   | ZSCAN21 | 4.5E-02 |
| rs10496190 | ALMS1   | 4.6E-02 |
| rs10185455 | ARL6IP6 | 4.6E-02 |
| rs10858851 | POC1B   | 4.6E-02 |
| rs261253   | CENPK   | 4.6E-02 |
| rs3213860  | TMEM91  | 4.6E-02 |
| rs284663   | TMEM91  | 4.6E-02 |
| rs260048   | CENPK   | 4.6E-02 |
| rs10858862 | POC1B   | 4.6E-02 |
| rs6864157  | CENPK   | 4.6E-02 |
| rs12234033 | CENPK   | 4.6E-02 |
| rs13162857 | CENPK   | 4.6E-02 |

|            |          |         |
|------------|----------|---------|
| rs4727676  | COG5     | 4.6E-02 |
| rs6706409  | ALMS1    | 4.6E-02 |
| rs11089465 | DUSP18   | 4.6E-02 |
| rs6897886  | CENPK    | 4.6E-02 |
| rs9557     | MAN1A2   | 4.6E-02 |
| rs447824   | CENPK    | 4.6E-02 |
| rs7040444  | NFIB     | 4.6E-02 |
| rs10858852 | POC1B    | 4.6E-02 |
| rs2286593  | MXRA7    | 4.6E-02 |
| rs10858860 | POC1B    | 4.6E-02 |
| rs10858854 | POC1B    | 4.6E-02 |
| rs2260000  | AIF1     | 4.6E-02 |
| rs6992733  | WDR67    | 4.7E-02 |
| rs2288871  | TMEM91   | 4.7E-02 |
| rs11083619 | TMEM91   | 4.7E-02 |
| rs2842197  | TIE1     | 4.7E-02 |
| rs9312661  | SRD5A3   | 4.7E-02 |
| rs948662   | GAB2     | 4.7E-02 |
| rs2241710  | TMEM91   | 4.7E-02 |
| rs10510432 | SLC6A6   | 4.7E-02 |
| rs6914721  | UHRF1BP1 | 4.7E-02 |
| rs6698100  | MAN1A2   | 4.8E-02 |
| rs12602    | TMEM91   | 4.8E-02 |
| rs1880949  | ZSCAN21  | 4.8E-02 |
| rs1880949  | PVRIG    | 4.8E-02 |
| rs726430   | BCL2L11  | 4.8E-02 |
| rs6775778  | IL20RB   | 4.8E-02 |
| rs11570825 | CDKL1    | 4.8E-02 |
| rs4424195  | PVRIG    | 4.8E-02 |
| rs12621105 | ARL6IP6  | 4.9E-02 |
| rs10858888 | POC1B    | 4.9E-02 |
| rs13160653 | CENPK    | 4.9E-02 |
| rs2367209  | SMC4     | 4.9E-02 |
| rs2241711  | TMEM91   | 4.9E-02 |
| rs17241135 | CENPK    | 4.9E-02 |
| rs7846091  | SPAG1    | 4.9E-02 |
| rs11133388 | SRD5A3   | 4.9E-02 |
| rs7758851  | E2F3     | 4.9E-02 |
| rs4803463  | TMEM91   | 4.9E-02 |
| rs882781   | POC1B    | 4.9E-02 |
| rs1186889  | KIAA1841 | 4.9E-02 |

|            |          |         |
|------------|----------|---------|
| rs3791626  | ARL6IP6  | 4.9E-02 |
| rs744892   | SLC6A6   | 4.9E-02 |
| rs12753193 | LEPR     | 4.9E-02 |
| rs7634255  | SMC4     | 4.9E-02 |
| rs876556   | POC1B    | 4.9E-02 |
| rs13122619 | SRD5A3   | 4.9E-02 |
| rs10274646 | ARPC1B   | 5.0E-02 |
| rs245520   | CENPK    | 5.0E-02 |
| rs7753949  | UHRF1BP1 | 5.0E-02 |
| rs42468    | CENPK    | 5.0E-02 |
| rs1043413  | TMEM91   | 5.0E-02 |
| rs10899513 | GAB2     | 5.0E-02 |

**Supplementary Table XI: CHD signature miRNAs with predicted target genes within the CHD mRNA causal module**

| Target gene | miR         | Target database | mRNA Module       |
|-------------|-------------|-----------------|-------------------|
| KLHL14      | miR_1275    | miRDB           | Key driver        |
| PAX5        | miR_1275    | miRDB           | CHD causal Module |
| TCF4        | miR_152     | miRDB           | CHD causal Module |
| ZNF154      | miR_191_5p  | miRDB           | CHD causal Module |
| BCL11A      | miR_324_5p  | miRDB           | CHD causal Module |
| HLA-DOA     | miR_324_5p  | miRDB           | Key driver        |
| QSOX2       | miR_324_5p  | miRDB           | CHD causal Module |
| MOBKL2B     | miR_339_3p  | miRDB           | Key driver        |
| MOBKL2B     | miR_339_5p  | miRDB           | Key driver        |
| AFF3        | miR_422a    | miRDB           | CHD causal Module |
| QSOX2       | miR_500a_5p | miRDB           | CHD causal Module |
| SCN3A       | miR_500a_5p | miRDB           | Key driver        |
| OSBPL10     | miR_502_3p  | miRDB           | Key driver        |
| FCRL5       | miR_589_3p  | miRDB           | CHD causal Module |
| HLA-DOB     | miR_589_3p  | miRDB           | CHD causal Module |
| KLHL14      | miR_589_3p  | miRDB           | Key driver        |
| MS4A1       | miR_589_3p  | miRDB           | Key driver        |
| STRBP       | miR_589_3p  | miRDB           | CHD causal Module |

**Supplementary Figure I: Volcano Plot of Coronary Heart Disease Differential miRNA Expression**

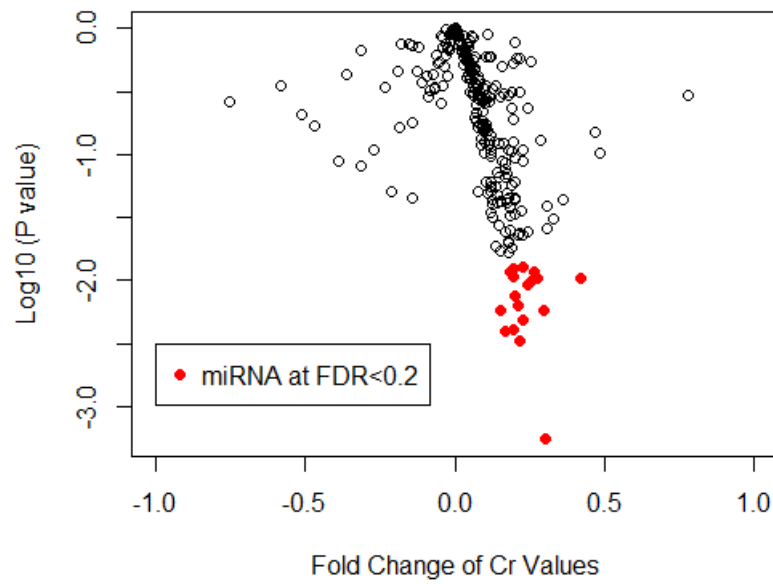

Ct value greater than 30 was considered to show no expression. Cr values are defined as 30 minus Ct values.

**Supplementary Figure II: Venn Diagram of the Overlap in miRNA-mRNA Co-expression Pairs between CHD Case Group, Control Group and Overall Sample Group.**

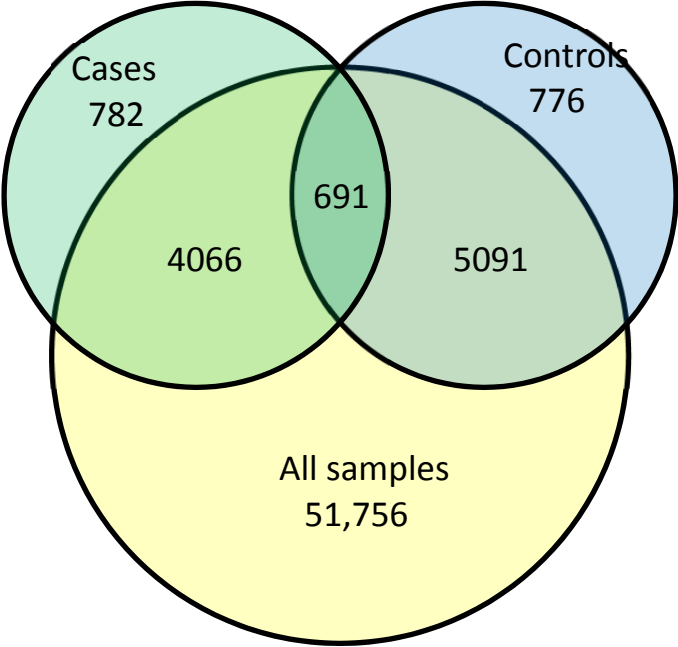

**Supplementary Figure III: Histograms of R-squares of modeling miRNA Ct values on Ct-means of top 50 ubiquitously expressed miRNAs and technique covariates**

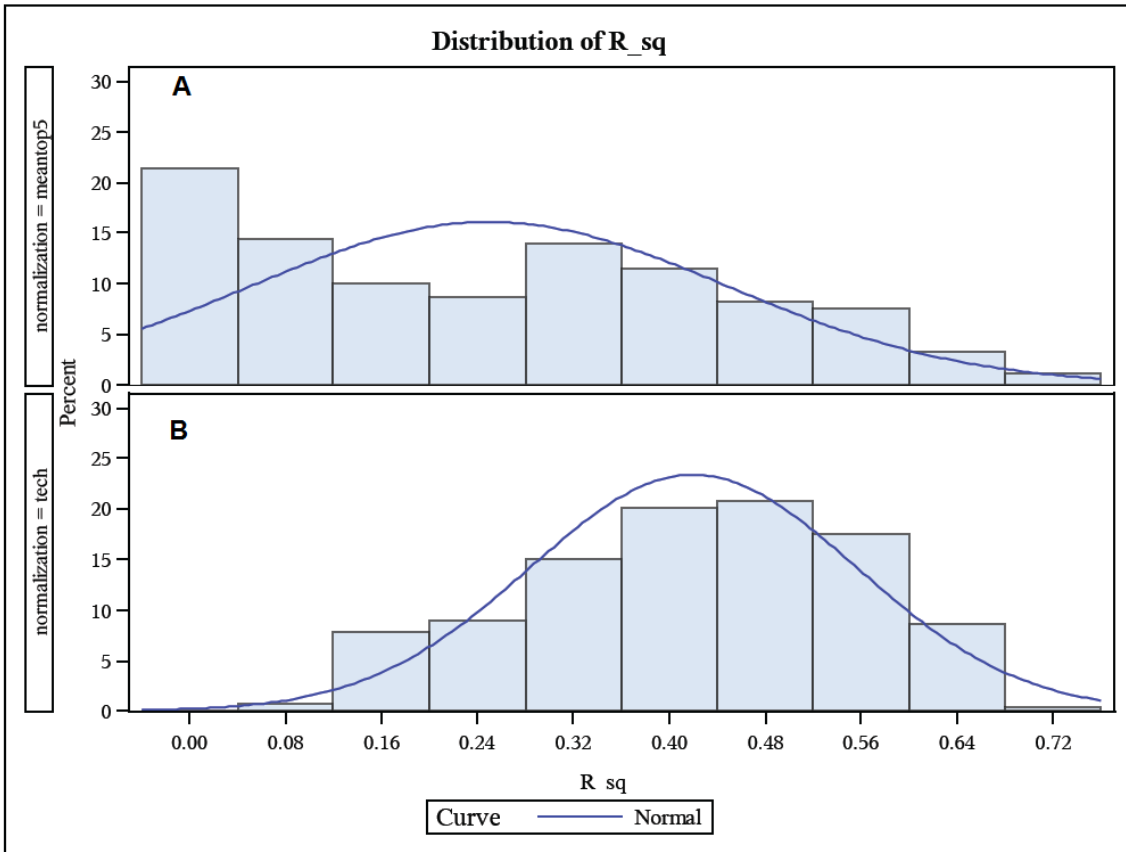

Supplement: NIHMS658382-supplement-1.pdf [file NIHMS658382-supplement-1.pdf]
